# Supplementary material for: Capillary zone electrophoresis–mass spectrometry with microliter-scale loading capacity, 140 min separation window and high peak capacity for bottom-up proteomics
Source: Royal Society of Chemistry journal article supplement (doi:10.1039/c7an00509a), 2017-01-01
Supplement: c7an00509a2.xlsx [file c7an00509a2.xlsx]

## Sheet: Protein ID_500 ug
Accession	Description	ΣCoverage	Σ# Proteins	Σ# Unique Peptides	Σ# Peptides	Σ# PSMs	# AAs	MW [kDa]	calc. pI
Q9CQ48	NudC domain-containing protein 2 OS=Mus musculus GN=Nudcd2 PE=1 SV=1 - [NUDC2_MOUSE]	38.22	2	3	3	4	157	17.6487	5.07178
P67984	60S ribosomal protein L22 OS=Mus musculus GN=Rpl22 PE=1 SV=2 - [RL22_MOUSE]	62.5	1	5	5	9	128	14.7498	9.18799
Q78ZM0	Sorting nexin 3 OS=Mus musculus GN=Snx3 PE=1 SV=1 - [Q78ZM0_MOUSE]	36.42	4	2	3	11	162	18.7508	8.66064
P62743	AP-2 complex subunit sigma OS=Mus musculus GN=Ap2s1 PE=1 SV=1 - [AP2S1_MOUSE]	13.38	3	3	3	14	142	17.0067	6.17627
P60335	Poly(rC)-binding protein 1 OS=Mus musculus GN=Pcbp1 PE=1 SV=1 - [PCBP1_MOUSE]	63.2	1	12	17	114	356	37.4739	7.09326
P62855	40S ribosomal protein S26 OS=Mus musculus GN=Rps26 PE=1 SV=3 - [RS26_MOUSE]	20.87	1	3	3	20	115	13.0071	11.0044
P83870	PHD finger-like domain-containing protein 5A OS=Mus musculus GN=Phf5a PE=1 SV=1 - [PHF5A_MOUSE]	25.45	1	2	2	21	110	12.397	8.41162
P62918	60S ribosomal protein L8 OS=Mus musculus GN=Rpl8 PE=1 SV=2 - [RL8_MOUSE]	16.34	1	3	3	5	257	28.0073	11.0337
Q6ZWQ5	Sorting nexin 12, isoform CRA_c OS=Mus musculus GN=Snx12 PE=1 SV=1 - [Q6ZWQ5_MOUSE]	46.91	4	4	5	17	162	18.8727	8.44092
Q9DBL1	Short/branched chain specific acyl-CoA dehydrogenase, mitochondrial OS=Mus musculus GN=Acadsb PE=1 SV=1 - [ACDSB_MOUSE]	10.65	2	3	3	9	432	47.8433	7.86963
Q3UHJ0	AP2-associated protein kinase 1 OS=Mus musculus GN=Aak1 PE=1 SV=2 - [AAK1_MOUSE]	22.21	2	13	13	51	959	103.282	6.69775
Q7TQF7	Amphiphysin OS=Mus musculus GN=Amph PE=1 SV=1 - [AMPH_MOUSE]	26.38	3	15	17	35	686	74.9672	4.62744
Q8BFZ3	Beta-actin-like protein 2 OS=Mus musculus GN=Actbl2 PE=1 SV=1 - [ACTBL_MOUSE]	26.06	1	1	7	140	376	41.977	5.49072
Q9QYB8	Beta-adducin OS=Mus musculus GN=Add2 PE=1 SV=4 - [ADDB_MOUSE]	15.03	2	9	10	53	725	80.5913	6.21436
Q8JZQ2	AFG3-like protein 2 OS=Mus musculus GN=Afg3l2 PE=1 SV=1 - [AFG32_MOUSE]	6.36	1	4	4	8	802	89.4626	8.60205
Q9QYB5	Gamma-adducin OS=Mus musculus GN=Add3 PE=1 SV=2 - [ADDG_MOUSE]	7.93	1	5	5	7	706	78.7277	5.94775
Q9EST5	Acidic leucine-rich nuclear phosphoprotein 32 family member B OS=Mus musculus GN=Anp32b PE=1 SV=1 - [AN32B_MOUSE]	8.09	1	1	3	8	272	31.0601	4.00537
Q9JME5	AP-3 complex subunit beta-2 OS=Mus musculus GN=Ap3b2 PE=1 SV=2 - [AP3B2_MOUSE]	5.73	1	4	4	19	1082	119.118	5.63037
Q91WU5	Arsenite methyltransferase OS=Mus musculus GN=As3mt PE=1 SV=2 - [AS3MT_MOUSE]	6.12	1	2	2	3	376	41.7671	5.85889
Q8BWG8	Beta-arrestin-1 OS=Mus musculus GN=Arrb1 PE=1 SV=1 - [ARRB1_MOUSE]	10.77	3	2	2	3	418	46.9432	6.27783
O35143	ATPase inhibitor, mitochondrial OS=Mus musculus GN=Atpif1 PE=1 SV=2 - [ATIF1_MOUSE]	27.36	1	1	3	7	106	12.1513	9.64209
O70305	Ataxin-2 OS=Mus musculus GN=Atxn2 PE=1 SV=1 - [ATX2_MOUSE]	2.57	4	3	3	5	1285	136.4	9.5542
Q8C0M9	Isoaspartyl peptidase/L-asparaginase OS=Mus musculus GN=Asrgl1 PE=1 SV=1 - [ASGL1_MOUSE]	45.4	1	12	12	38	326	33.9284	7.6499
P14094	Sodium/potassium-transporting ATPase subunit beta-1 OS=Mus musculus GN=Atp1b1 PE=1 SV=1 - [AT1B1_MOUSE]	17.76	2	4	4	9	304	35.172	8.646
Q9D3D9	ATP synthase subunit delta, mitochondrial OS=Mus musculus GN=Atp5d PE=1 SV=1 - [ATPD_MOUSE]	42.86	1	7	7	48	168	17.5891	5.08447
O54984	ATPase Asna1 OS=Mus musculus GN=Asna1 PE=1 SV=2 - [ASNA_MOUSE]	15.8	1	3	3	4	348	38.7974	4.90674
Q3UGY8	Brefeldin A-inhibited guanine nucleotide-exchange protein 3 OS=Mus musculus GN=Arfgef3 PE=1 SV=1 - [BIG3_MOUSE]	2.21	1	2	2	3	2170	239.938	5.88428
P14106	Complement C1q subcomponent subunit B OS=Mus musculus GN=C1qb PE=1 SV=2 - [C1QB_MOUSE]	8.3	1	2	2	3	253	26.7006	8.14795
Q922D8	C-1-tetrahydrofolate synthase, cytoplasmic OS=Mus musculus GN=Mthfd1 PE=1 SV=4 - [C1TC_MOUSE]	18.07	1	10	10	16	935	101.136	7.13721
O54962	Barrier-to-autointegration factor OS=Mus musculus GN=Banf1 PE=1 SV=1 - [BAF_MOUSE]	26.97	1	1	1	10	89	10.096	6.0874
Q80VC9	Calmodulin-regulated spectrin-associated protein 3 OS=Mus musculus GN=Camsap3 PE=1 SV=1 - [CAMP3_MOUSE]	6.79	8	4	4	8	1252	135.091	8.42627
O35127	Protein C10 OS=Mus musculus GN=Grcc10 PE=1 SV=1 - [C10_MOUSE]	73.02	1	7	7	33	126	13.1857	5.13525
P47754	F-actin-capping protein subunit alpha-2 OS=Mus musculus GN=Capza2 PE=1 SV=3 - [CAZA2_MOUSE]	37.76	3	6	8	25	286	32.9466	5.84619
Q9WUD1	STIP1 homology and U box-containing protein 1 OS=Mus musculus GN=Stub1 PE=1 SV=1 - [CHIP_MOUSE]	34.21	1	9	9	25	304	34.8873	6.01123
P21460	Cystatin-C OS=Mus musculus GN=Cst3 PE=1 SV=2 - [CYTC_MOUSE]	51.43	2	5	5	14	140	15.5208	8.99756
P62897	Cytochrome c, somatic OS=Mus musculus GN=Cycs PE=1 SV=2 - [CYC_MOUSE]	43.81	1	7	9	32	105	11.598	9.5835
P58252	Elongation factor 2 OS=Mus musculus GN=Eef2 PE=1 SV=2 - [EF2_MOUSE]	23.66	1	15	15	65	858	95.2529	6.82959
Q9QZD9	Eukaryotic translation initiation factor 3 subunit I OS=Mus musculus GN=Eif3i PE=1 SV=1 - [EIF3I_MOUSE]	23.69	2	5	5	6	325	36.4376	5.64307
Q3U0V1	Far upstream element-binding protein 2 OS=Mus musculus GN=Khsrp PE=1 SV=2 - [FUBP2_MOUSE]	22.99	1	11	13	50	748	76.7277	7.32764
Q8R059	UDP-glucose 4-epimerase OS=Mus musculus GN=Gale PE=1 SV=1 - [GALE_MOUSE]	10.66	1	2	2	3	347	38.2003	6.7417
O08795	Glucosidase 2 subunit beta OS=Mus musculus GN=Prkcsh PE=1 SV=1 - [GLU2B_MOUSE]	11.52	1	7	7	20	521	58.7558	4.4624
P19157	Glutathione S-transferase P 1 OS=Mus musculus GN=Gstp1 PE=1 SV=2 - [GSTP1_MOUSE]	12.38	2	2	2	9	210	23.5941	7.86963
Q9JKS5	Intracellular hyaluronan-binding protein 4 OS=Mus musculus GN=Habp4 PE=1 SV=2 - [HABP4_MOUSE]	13.14	2	3	3	11	411	45.8964	6.84424
P11352	Glutathione peroxidase 1 OS=Mus musculus GN=Gpx1 PE=1 SV=2 - [GPX1_MOUSE]	29.35	3	3	3	18	201	22.3162	7.21045
Q3THK7	GMP synthase [glutamine-hydrolyzing] OS=Mus musculus GN=Gmps PE=1 SV=2 - [GUAA_MOUSE]	27.99	1	10	10	35	693	76.6749	6.72705
O09172	Glutamate--cysteine ligase regulatory subunit OS=Mus musculus GN=Gclm PE=1 SV=1 - [GSH0_MOUSE]	13.5	4	3	3	6	274	30.5155	5.51611
Q9D8B3	Charged multivesicular body protein 4b OS=Mus musculus GN=Chmp4b PE=1 SV=2 - [CHM4B_MOUSE]	19.64	1	4	4	8	224	24.9206	4.81787
Q91V76	Ester hydrolase C11orf54 homolog OS=Mus musculus PE=1 SV=1 - [CK054_MOUSE]	8.25	1	3	3	4	315	34.9733	6.29053
Q5M8N0	CB1 cannabinoid receptor-interacting protein 1 OS=Mus musculus GN=Cnrip1 PE=1 SV=1 - [CNRP1_MOUSE]	45.73	2	4	4	14	164	18.6006	7.95752
Q61330	Contactin-2 OS=Mus musculus GN=Cntn2 PE=1 SV=2 - [CNTN2_MOUSE]	11.92	2	10	10	18	1040	113.146	7.62061
Q3UJP5	Protein C8orf37 homolog OS=Mus musculus PE=1 SV=1 - [CH037_MOUSE]	21.53	2	3	3	13	209	23.8325	6.85889
Q9QYB1	Chloride intracellular channel protein 4 OS=Mus musculus GN=Clic4 PE=1 SV=3 - [CLIC4_MOUSE]	34.39	1	5	5	7	253	28.7107	5.59229
Q9QXK3	Coatomer subunit gamma-2 OS=Mus musculus GN=Copg2 PE=1 SV=1 - [COPG2_MOUSE]	5.86	1	4	4	6	871	97.6175	5.79541
Q8BH59	Calcium-binding mitochondrial carrier protein Aralar1 OS=Mus musculus GN=Slc25a12 PE=1 SV=1 - [CMC1_MOUSE]	24.52	3	12	12	27	677	74.5227	8.25049
Q9D1A2	Cytosolic non-specific dipeptidase OS=Mus musculus GN=Cndp2 PE=1 SV=1 - [CNDP2_MOUSE]	26.95	1	8	8	21	475	52.7336	5.65576
Q61164	Transcriptional repressor CTCF OS=Mus musculus GN=Ctcf PE=1 SV=2 - [CTCF_MOUSE]	1.22	1	1	1	2	736	83.6919	6.90283
Q9CXX9	CUE domain-containing protein 2 OS=Mus musculus GN=Cuedc2 PE=1 SV=1 - [CUED2_MOUSE]	4.58	1	1	1	2	284	31.832	4.98291
Q8WTY4	Anamorsin OS=Mus musculus GN=Ciapin1 PE=1 SV=1 - [CPIN1_MOUSE]	17.8	3	3	3	12	309	33.4077	5.19873
Q9WV69	Dematin OS=Mus musculus GN=Dmtn PE=1 SV=1 - [DEMA_MOUSE]	31.85	1	12	12	35	405	45.4402	8.41162
Q62108	Disks large homolog 4 OS=Mus musculus GN=Dlg4 PE=1 SV=1 - [DLG4_MOUSE]	11.88	2	6	6	16	724	80.4228	5.87158
P48318	Glutamate decarboxylase 1 OS=Mus musculus GN=Gad1 PE=1 SV=2 - [DCE1_MOUSE]	9.95	3	5	5	20	593	66.6055	7.1665
Q9CQ62	2,4-dienoyl-CoA reductase, mitochondrial OS=Mus musculus GN=Decr1 PE=1 SV=1 - [DECR_MOUSE]	30.15	1	6	6	8	335	36.1907	8.95361
Q9EQF6	Dihydropyrimidinase-related protein 5 OS=Mus musculus GN=Dpysl5 PE=1 SV=1 - [DPYL5_MOUSE]	37.59	1	14	14	48	564	61.4773	7.09326
P08113	Endoplasmin OS=Mus musculus GN=Hsp90b1 PE=1 SV=2 - [ENPL_MOUSE]	21.7	3	12	13	93	802	92.4183	4.81787
Q3TY60	Protein FAM131B OS=Mus musculus GN=Fam131b PE=1 SV=1 - [F131B_MOUSE]	12.65	2	3	3	6	332	35.9355	4.44971
P57759	Endoplasmic reticulum resident protein 29 OS=Mus musculus GN=Erp29 PE=1 SV=2 - [ERP29_MOUSE]	27.1	1	5	5	19	262	28.8051	6.15088
P70186	Epiphycan OS=Mus musculus GN=Epyc PE=2 SV=1 - [EPYC_MOUSE]	1.86	1	1	1	3	322	36.7395	4.97021
Q8C729	Protein FAM126B OS=Mus musculus GN=Fam126b PE=1 SV=1 - [F126B_MOUSE]	3.77	1	2	2	3	530	58.5499	7.72314
Q9CPW2	Ferredoxin-2, mitochondrial OS=Mus musculus GN=Fdx2 PE=1 SV=1 - [FDX2_MOUSE]	26.44	1	3	3	7	174	18.7545	6.03662
E9PV24	Fibrinogen alpha chain OS=Mus musculus GN=Fga PE=1 SV=1 - [FIBA_MOUSE]	7.86	1	4	4	7	789	87.3753	6.11279
P45878	Peptidyl-prolyl cis-trans isomerase FKBP2 OS=Mus musculus GN=Fkbp2 PE=1 SV=1 - [FKBP2_MOUSE]	24.29	1	3	3	6	140	15.3342	8.88037
Q8BUV3	Gephyrin OS=Mus musculus GN=Gphn PE=1 SV=2 - [GEPH_MOUSE]	10.92	2	5	5	18	769	83.2298	5.60498
Q61598	Rab GDP dissociation inhibitor beta OS=Mus musculus GN=Gdi2 PE=1 SV=1 - [GDIB_MOUSE]	19.55	1	5	10	42	445	50.5047	6.25244
Q9CPV4	Glyoxalase domain-containing protein 4 OS=Mus musculus GN=Glod4 PE=1 SV=1 - [GLOD4_MOUSE]	29.87	4	6	6	15	298	33.2955	5.46533
P22315	Ferrochelatase, mitochondrial OS=Mus musculus GN=Fech PE=1 SV=2 - [HEMH_MOUSE]	26.9	2	6	6	11	420	47.1002	8.90967
P70349	Histidine triad nucleotide-binding protein 1 OS=Mus musculus GN=Hint1 PE=1 SV=3 - [HINT1_MOUSE]	64.29	2	8	8	29	126	13.7681	6.87354
P07901	Heat shock protein HSP 90-alpha OS=Mus musculus GN=Hsp90aa1 PE=1 SV=4 - [HS90A_MOUSE]	35.88	3	16	25	176	733	84.7348	5.0083
Q99JP6	Homer protein homolog 3 OS=Mus musculus GN=Homer3 PE=1 SV=2 - [HOME3_MOUSE]	26.12	3	6	6	13	356	39.6701	5.36377
P17879	Heat shock 70 kDa protein 1B OS=Mus musculus GN=Hspa1b PE=1 SV=3 - [HS71B_MOUSE]	26.95	1	1	12	27	642	70.133	5.71924
P48722	Heat shock 70 kDa protein 4L OS=Mus musculus GN=Hspa4l PE=1 SV=2 - [HS74L_MOUSE]	39.38	4	26	28	141	838	94.3225	5.74463
Q61696	Heat shock 70 kDa protein 1A OS=Mus musculus GN=Hspa1a PE=1 SV=2 - [HS71A_MOUSE]	26.83	1	2	13	31	641	70.036	5.71924
Q61316	Heat shock 70 kDa protein 4 OS=Mus musculus GN=Hspa4 PE=1 SV=1 - [HSP74_MOUSE]	35.79	1	1	25	101	841	94.0733	5.23682
Q9R002	Interferon-activable protein 202 OS=Mus musculus GN=Ifi202 PE=1 SV=3 - [IFI2_MOUSE]	2.47	1	1	1	2	445	50.4345	8.48486
Q8BG51	Mitochondrial Rho GTPase 1 OS=Mus musculus GN=Rhot1 PE=1 SV=1 - [MIRO1_MOUSE]	4.91	1	2	2	5	631	72.1956	6.49365
Q8BMF4	Dihydrolipoyllysine-residue acetyltransferase component of pyruvate dehydrogenase complex, mitochondrial OS=Mus musculus GN=Dlat PE=1 SV=2 - [ODP2_MOUSE]	26.17	1	15	15	68	642	67.8987	8.57275
Q9DCC4	Pyrroline-5-carboxylate reductase 3 OS=Mus musculus GN=Pycrl PE=1 SV=2 - [P5CR3_MOUSE]	11.68	1	3	3	11	274	28.7027	7.26904
Q63850	Nuclear pore glycoprotein p62 OS=Mus musculus GN=Nup62 PE=1 SV=2 - [NUP62_MOUSE]	3.99	1	1	1	4	526	53.2224	5.31299
P29341	Polyadenylate-binding protein 1 OS=Mus musculus GN=Pabpc1 PE=1 SV=2 - [PABP1_MOUSE]	11.16	3	4	4	5	636	70.6259	9.49561
Q9D051	Pyruvate dehydrogenase E1 component subunit beta, mitochondrial OS=Mus musculus GN=Pdhb PE=1 SV=1 - [ODPB_MOUSE]	54.32	1	18	18	173	359	38.912	6.87354
Q6IFZ6	Keratin, type II cytoskeletal 1b OS=Mus musculus GN=Krt77 PE=1 SV=1 - [K2C1B_MOUSE]	10.14	4	4	4	15	572	61.3216	8.01611
Q60749	KH domain-containing, RNA-binding, signal transduction-associated protein 1 OS=Mus musculus GN=Khdrbs1 PE=1 SV=2 - [KHDR1_MOUSE]	11.51	1	2	2	3	443	48.3404	8.71924
O35066	Kinesin-like protein KIF3C OS=Mus musculus GN=Kif3c PE=1 SV=3 - [KIF3C_MOUSE]	3.89	1	1	2	3	796	89.917	8.06006
Q61771	Kinesin-like protein KIF3B OS=Mus musculus GN=Kif3b PE=1 SV=1 - [KIF3B_MOUSE]	10.98	1	4	5	8	747	85.2358	7.69385
P16125	L-lactate dehydrogenase B chain OS=Mus musculus GN=Ldhb PE=1 SV=2 - [LDHB_MOUSE]	44.91	3	13	14	65	334	36.549	6.04932
Q9DB98	Leukocyte receptor cluster member 1 homolog OS=Mus musculus GN=Leng1 PE=2 SV=1 - [LENG1_MOUSE]	3.45	1	1	1	2	261	30.4509	9.94971
Q922Q8	Leucine-rich repeat-containing protein 59 OS=Mus musculus GN=Lrrc59 PE=1 SV=1 - [LRC59_MOUSE]	8.14	1	2	2	3	307	34.8558	9.5249
Q8JZS0	Protein lin-7 homolog A OS=Mus musculus GN=Lin7a PE=1 SV=2 - [LIN7A_MOUSE]	45.92	2	7	8	20	233	25.9766	8.71924
P21619	Lamin-B2 OS=Mus musculus GN=Lmnb2 PE=1 SV=2 - [LMNB2_MOUSE]	24.5	2	7	8	18	596	67.2773	5.50342
Q505F5	Leucine-rich repeat-containing protein 47 OS=Mus musculus GN=Lrrc47 PE=1 SV=1 - [LRC47_MOUSE]	13.25	2	4	4	18	581	63.5507	8.104
P60469	Liprin-alpha-3 OS=Mus musculus GN=Ppfia3 PE=1 SV=2 - [LIPA3_MOUSE]	18.93	2	14	14	31	1194	133.344	5.64307
P20917	Myelin-associated glycoprotein OS=Mus musculus GN=Mag PE=1 SV=2 - [MAG_MOUSE]	12.94	4	7	7	14	626	69.2158	5.09717
P56942	Pro-MCH OS=Mus musculus GN=Pmch PE=1 SV=2 - [MCH_MOUSE]	7.27	1	1	1	12	165	18.5042	7.13721
Q9QYR6	Microtubule-associated protein 1A OS=Mus musculus GN=Map1a PE=1 SV=2 - [MAP1A_MOUSE]	15.96	2	32	33	84	2776	299.957	4.99561
P53986	Monocarboxylate transporter 1 OS=Mus musculus GN=Slc16a1 PE=1 SV=1 - [MOT1_MOUSE]	4.06	1	1	1	10	493	53.2324	7.47412
P20357	Microtubule-associated protein 2 OS=Mus musculus GN=Map2 PE=1 SV=2 - [MTAP2_MOUSE]	32.77	11	44	44	190	1828	199.01	4.90674
Q8C854	Myelin expression factor 2 OS=Mus musculus GN=Myef2 PE=1 SV=1 - [MYEF2_MOUSE]	22	7	10	10	37	591	63.2543	8.86572
P52503	NADH dehydrogenase [ubiquinone] iron-sulfur protein 6, mitochondrial OS=Mus musculus GN=Ndufs6 PE=1 SV=2 - [NDUS6_MOUSE]	56.03	1	8	8	30	116	13.0117	8.646
Q8BLF1	Neutral cholesterol ester hydrolase 1 OS=Mus musculus GN=Nceh1 PE=1 SV=1 - [NCEH1_MOUSE]	6.13	2	2	2	4	408	45.7107	7.04932
Q8K3J1	NADH dehydrogenase [ubiquinone] iron-sulfur protein 8, mitochondrial OS=Mus musculus GN=Ndufs8 PE=1 SV=1 - [NDUS8_MOUSE]	41.98	1	7	7	44	212	24.0228	6.21436
Q810U3	Neurofascin OS=Mus musculus GN=Nfasc PE=1 SV=1 - [NFASC_MOUSE]	19.68	1	1	16	69	1240	137.889	6.18896
Q9Z1J3	Cysteine desulfurase, mitochondrial OS=Mus musculus GN=Nfs1 PE=1 SV=3 - [NFS1_MOUSE]	19.83	4	6	6	10	459	50.538	8.1626
Q62433	Protein NDRG1 OS=Mus musculus GN=Ndrg1 PE=1 SV=1 - [NDRG1_MOUSE]	23.35	6	9	9	42	394	42.9809	6.1001
O55126	Protein NipSnap homolog 2 OS=Mus musculus GN=Gbas PE=1 SV=1 - [NIPS2_MOUSE]	6.76	2	3	3	10	281	32.9119	9.26123
Q9DCS9	NADH dehydrogenase [ubiquinone] 1 beta subcomplex subunit 10 OS=Mus musculus GN=Ndufb10 PE=1 SV=3 - [NDUBA_MOUSE]	67.05	2	15	15	59	176	21.0104	8.03076
Q02819	Nucleobindin-1 OS=Mus musculus GN=Nucb1 PE=1 SV=2 - [NUCB1_MOUSE]	8.5	3	3	3	16	459	53.3759	5.07178
Q810U4	Neuronal cell adhesion molecule OS=Mus musculus GN=Nrcam PE=1 SV=2 - [NRCAM_MOUSE]	12.9	1	11	11	34	1256	138.435	5.90967
Q9Z0P4	Paralemmin-1 OS=Mus musculus GN=Palm PE=1 SV=1 - [PALM_MOUSE]	7.31	1	2	2	8	383	41.5888	4.84326
Q61823	Programmed cell death protein 4 OS=Mus musculus GN=Pdcd4 PE=1 SV=1 - [PDCD4_MOUSE]	8.1	3	3	3	4	469	51.67	5.16064
Q8BFQ8	Parkinson disease 7 domain-containing protein 1 OS=Mus musculus GN=Pddc1 PE=1 SV=1 - [PDDC1_MOUSE]	16.82	1	2	2	17	220	23.2628	7.04932
Q8CAA7	Glucose 1,6-bisphosphate synthase OS=Mus musculus GN=Pgm2l1 PE=1 SV=1 - [PGM2L_MOUSE]	5.64	2	2	2	3	621	70.2343	6.49365
Q9D404	3-oxoacyl-[acyl-carrier-protein] synthase, mitochondrial OS=Mus musculus GN=Oxsm PE=1 SV=1 - [OXSM_MOUSE]	9.15	2	2	2	3	459	48.5965	7.06396
P08003	Protein disulfide-isomerase A4 OS=Mus musculus GN=Pdia4 PE=1 SV=3 - [PDIA4_MOUSE]	11.29	2	4	4	5	638	71.9375	5.31299
Q9DAK9	14 kDa phosphohistidine phosphatase OS=Mus musculus GN=Phpt1 PE=1 SV=1 - [PHP14_MOUSE]	33.87	1	5	5	50	124	13.9877	5.52881
Q01065	Calcium/calmodulin-dependent 3',5'-cyclic nucleotide phosphodiesterase 1B OS=Mus musculus GN=Pde1b PE=1 SV=2 - [PDE1B_MOUSE]	12.15	1	3	3	8	535	61.1867	5.71924
Q9QUR7	Peptidyl-prolyl cis-trans isomerase NIMA-interacting 1 OS=Mus musculus GN=Pin1 PE=1 SV=1 - [PIN1_MOUSE]	45.45	1	8	8	51	165	18.3591	8.79248
O35621	Phosphomannomutase 1 OS=Mus musculus GN=Pmm1 PE=1 SV=1 - [PMM1_MOUSE]	20.61	3	3	4	8	262	29.7561	5.46533
Q9CR16	Peptidyl-prolyl cis-trans isomerase D OS=Mus musculus GN=Ppid PE=1 SV=3 - [PPID_MOUSE]	41.62	1	12	12	23	370	40.7167	7.43018
Q9Z1B3	1-phosphatidylinositol 4,5-bisphosphate phosphodiesterase beta-1 OS=Mus musculus GN=Plcb1 PE=1 SV=2 - [PLCB1_MOUSE]	14.23	1	12	12	20	1216	138.309	6.12549
Q99KR7	Peptidyl-prolyl cis-trans isomerase F, mitochondrial OS=Mus musculus GN=Ppif PE=1 SV=1 - [PPIF_MOUSE]	65.05	1	9	9	56	206	21.723	9.15869
P32848	Parvalbumin alpha OS=Mus musculus GN=Pvalb PE=1 SV=3 - [PRVA_MOUSE]	30.91	1	2	2	8	110	11.9231	5.18604
Q6PB44	Tyrosine-protein phosphatase non-receptor type 23 OS=Mus musculus GN=Ptpn23 PE=1 SV=2 - [PTN23_MOUSE]	1.12	1	2	2	6	1692	185.1	6.80029
Q11011	Puromycin-sensitive aminopeptidase OS=Mus musculus GN=Npepps PE=1 SV=2 - [PSA_MOUSE]	11.85	5	9	9	32	920	103.26	5.89697
Q9Z2U0	Proteasome subunit alpha type-7 OS=Mus musculus GN=Psma7 PE=1 SV=1 - [PSA7_MOUSE]	32.26	2	5	5	37	248	27.8376	8.45557
P54830	Tyrosine-protein phosphatase non-receptor type 5 OS=Mus musculus GN=Ptpn5 PE=1 SV=2 - [PTN5_MOUSE]	4.07	1	2	2	4	541	60.7764	5.19873
Q8C570	mRNA export factor OS=Mus musculus GN=Rae1 PE=1 SV=1 - [RAE1L_MOUSE]	18.21	2	5	5	14	368	40.9389	7.82568
P69566	Ran-binding protein 9 OS=Mus musculus GN=Ranbp9 PE=1 SV=1 - [RANB9_MOUSE]	8.88	2	4	4	18	653	70.9666	6.84424
Q9Z268	RasGAP-activating-like protein 1 OS=Mus musculus GN=Rasal1 PE=1 SV=2 - [RASL1_MOUSE]	6.13	1	3	3	6	799	89.3388	6.3667
Q5U3K5	Rab-like protein 6 OS=Mus musculus GN=Rabl6 PE=1 SV=2 - [RABL6_MOUSE]	3.72	1	1	1	4	725	79.7817	5.52881
P51150	Ras-related protein Rab-7a OS=Mus musculus GN=Rab7a PE=1 SV=2 - [RAB7A_MOUSE]	26.57	3	5	5	12	207	23.4748	6.69775
Q8CI94	Glycogen phosphorylase, brain form OS=Mus musculus GN=Pygb PE=1 SV=3 - [PYGB_MOUSE]	12.1	1	7	7	18	843	96.6685	6.72705
Q8VIJ6	Splicing factor, proline- and glutamine-rich OS=Mus musculus GN=Sfpq PE=1 SV=1 - [SFPQ_MOUSE]	16.17	1	9	9	31	699	75.3943	9.43701
P34022	Ran-specific GTPase-activating protein OS=Mus musculus GN=Ranbp1 PE=1 SV=2 - [RANG_MOUSE]	35.47	2	7	7	12	203	23.5817	5.22412
P63321	Ras-related protein Ral-A OS=Mus musculus GN=Rala PE=1 SV=1 - [RALA_MOUSE]	12.62	2	2	2	7	206	23.538	7.10791
Q91VI7	Ribonuclease inhibitor OS=Mus musculus GN=Rnh1 PE=1 SV=1 - [RINI_MOUSE]	48.9	4	14	14	53	456	49.7841	4.77979
Q9D8E6	60S ribosomal protein L4 OS=Mus musculus GN=Rpl4 PE=1 SV=3 - [RL4_MOUSE]	10.5	1	3	3	4	419	47.124	11.0044
Q9D0Q7	39S ribosomal protein L45, mitochondrial OS=Mus musculus GN=Mrpl45 PE=1 SV=1 - [RM45_MOUSE]	9.15	1	1	1	2	306	35.3884	9.23193
P47955	60S acidic ribosomal protein P1 OS=Mus musculus GN=Rplp1 PE=1 SV=1 - [RLA1_MOUSE]	66.67	2	3	3	39	114	11.4677	4.32275
P62911	60S ribosomal protein L32 OS=Mus musculus GN=Rpl32 PE=1 SV=2 - [RL32_MOUSE]	34.81	1	6	6	7	135	15.8498	11.3267
P47911	60S ribosomal protein L6 OS=Mus musculus GN=Rpl6 PE=1 SV=3 - [RL6_MOUSE]	13.51	2	3	3	5	296	33.4889	10.6968
Q8BFU3	RING finger protein 214 OS=Mus musculus GN=Rnf214 PE=1 SV=1 - [RN214_MOUSE]	5.69	1	2	2	8	668	73.5784	6.22705
Q91YQ5	Dolichyl-diphosphooligosaccharide--protein glycosyltransferase subunit 1 OS=Mus musculus GN=Rpn1 PE=1 SV=1 - [RPN1_MOUSE]	8.39	2	4	4	10	608	68.4857	6.45557
Q8VD37	SH3-containing GRB2-like protein 3-interacting protein 1 OS=Mus musculus GN=Sgip1 PE=1 SV=1 - [SGIP1_MOUSE]	22.83	2	11	11	24	806	86.0098	7.86963
Q9ES97	Reticulon-3 OS=Mus musculus GN=Rtn3 PE=1 SV=2 - [RTN3_MOUSE]	9.96	1	7	7	17	964	103.814	4.91943
Q9D1J3	SAP domain-containing ribonucleoprotein OS=Mus musculus GN=Sarnp PE=1 SV=3 - [SARNP_MOUSE]	19.05	1	3	3	9	210	23.5183	6.65381
Q9CQA3	Succinate dehydrogenase [ubiquinone] iron-sulfur subunit, mitochondrial OS=Mus musculus GN=Sdhb PE=1 SV=1 - [SDHB_MOUSE]	44.68	1	13	13	90	282	31.7929	8.67529
Q64105	Sepiapterin reductase OS=Mus musculus GN=Spr PE=1 SV=1 - [SPRE_MOUSE]	36.78	4	7	7	77	261	27.8654	5.74463
Q7TN29	Stromal membrane-associated protein 2 OS=Mus musculus GN=Smap2 PE=1 SV=1 - [SMAP2_MOUSE]	5.84	1	1	1	2	428	46.5467	8.86572
P97364	Selenide, water dikinase 2 OS=Mus musculus GN=Sephs2 PE=1 SV=3 - [SPS2_MOUSE]	5.97	1	2	2	3	452	47.804	6.06201
Q80U23	Syntaphilin OS=Mus musculus GN=Snph PE=1 SV=3 - [SNPH_MOUSE]	18.38	2	5	5	22	495	53.7196	5.89697
Q9Z2I9	Succinate--CoA ligase [ADP-forming] subunit beta, mitochondrial OS=Mus musculus GN=Sucla2 PE=1 SV=2 - [SUCB1_MOUSE]	28.08	1	16	16	52	463	50.0821	7.00537
P48428	Tubulin-specific chaperone A OS=Mus musculus GN=Tbca PE=1 SV=3 - [TBCA_MOUSE]	29.63	1	3	3	7	108	12.7496	5.2749
Q9R1Q8	Transgelin-3 OS=Mus musculus GN=Tagln3 PE=1 SV=1 - [TAGL3_MOUSE]	54.77	1	16	17	82	199	22.4562	7.32764
Q8QZT1	Acetyl-CoA acetyltransferase, mitochondrial OS=Mus musculus GN=Acat1 PE=1 SV=1 - [THIL_MOUSE]	57.55	1	17	17	175	424	44.7873	8.51416
P26039	Talin-1 OS=Mus musculus GN=Tln1 PE=1 SV=2 - [TLN1_MOUSE]	8.7	1	8	10	17	2541	269.653	6.17627
P62077	Mitochondrial import inner membrane translocase subunit Tim8 B OS=Mus musculus GN=Timm8b PE=1 SV=1 - [TIM8B_MOUSE]	38.55	1	2	2	6	83	9.28052	5.12256
Q8CAY6	Acetyl-CoA acetyltransferase, cytosolic OS=Mus musculus GN=Acat2 PE=1 SV=2 - [THIC_MOUSE]	37.78	4	8	8	25	397	41.2712	7.50342
Q69ZU6	Thrombospondin type-1 domain-containing protein 7A OS=Mus musculus GN=Thsd7a PE=1 SV=2 - [THS7A_MOUSE]	6.02	3	5	5	9	1645	183.406	7.1958
Q8CH72	E3 ubiquitin-protein ligase TRIM32 OS=Mus musculus GN=Trim32 PE=1 SV=2 - [TRI32_MOUSE]	6.26	1	2	2	3	655	72.0113	6.90283
Q9CRB6	Tubulin polymerization-promoting protein family member 3 OS=Mus musculus GN=Tppp3 PE=1 SV=1 - [TPPP3_MOUSE]	51.14	1	10	10	20	176	18.9537	9.11475
Q9CPQ3	Mitochondrial import receptor subunit TOM22 homolog OS=Mus musculus GN=Tomm22 PE=1 SV=3 - [TOM22_MOUSE]	17.61	1	1	1	16	142	15.5268	4.33545
Q921I1	Serotransferrin OS=Mus musculus GN=Tf PE=1 SV=1 - [TRFE_MOUSE]	26.26	6	16	16	44	697	76.6737	7.18115
Q9EP53	Hamartin OS=Mus musculus GN=Tsc1 PE=1 SV=1 - [TSC1_MOUSE]	4.05	3	2	2	8	1161	128.666	6.3667
Q9CZY3	Ubiquitin-conjugating enzyme E2 variant 1 OS=Mus musculus GN=Ube2v1 PE=1 SV=1 - [UB2V1_MOUSE]	70.75	4	6	9	32	147	16.3442	7.95752
P52479	Ubiquitin carboxyl-terminal hydrolase 10 OS=Mus musculus GN=Usp10 PE=1 SV=3 - [UBP10_MOUSE]	6.06	1	2	2	3	792	86.9677	5.17334
Q9D2M8	Ubiquitin-conjugating enzyme E2 variant 2 OS=Mus musculus GN=Ube2v2 PE=1 SV=4 - [UB2V2_MOUSE]	75.17	3	5	8	53	145	16.3562	8.08936
P51863	V-type proton ATPase subunit d 1 OS=Mus musculus GN=Atp6v0d1 PE=1 SV=2 - [VA0D1_MOUSE]	11.68	1	3	3	9	351	40.2752	4.99561
Q9Z1G3	V-type proton ATPase subunit C 1 OS=Mus musculus GN=Atp6v1c1 PE=1 SV=4 - [VATC1_MOUSE]	14.92	1	5	5	35	382	43.8599	7.45947
Q8R307	Vacuolar protein sorting-associated protein 18 homolog OS=Mus musculus GN=Vps18 PE=1 SV=2 - [VPS18_MOUSE]	1.44	1	1	1	2	973	110.149	6.0874
Q8CGF6	WD repeat-containing protein 47 OS=Mus musculus GN=Wdr47 PE=1 SV=2 - [WDR47_MOUSE]	7.17	1	3	3	5	920	102.247	5.97314
Q9Z0U1	Tight junction protein ZO-2 OS=Mus musculus GN=Tjp2 PE=1 SV=2 - [ZO2_MOUSE]	9.17	1	5	5	34	1167	131.2	6.78564
E0CY11	Neurexin-1 OS=Mus musculus GN=Nrxn1 PE=1 SV=2 - [E0CY11_MOUSE]	1.54	4	2	2	4	1495	164.091	5.8335
D3Z7E5	Glycogen synthase kinase-3 alpha OS=Mus musculus GN=Gsk3a PE=1 SV=1 - [D3Z7E5_MOUSE]	7	2	1	1	2	486	51.2142	8.90967
B1AS06	Disks large-associated protein 3 OS=Mus musculus GN=Dlgap3 PE=1 SV=1 - [B1AS06_MOUSE]	8.7	2	3	3	9	966	104.607	8.80713
F8VQ11	Rho GTPase-activating protein 23 OS=Mus musculus GN=Arhgap23 PE=1 SV=1 - [F8VQ11_MOUSE]	8.77	4	4	5	9	1277	139.223	9.05615
A0A087WNW2	Neurofascin OS=Mus musculus GN=Nfasc PE=1 SV=1 - [A0A087WNW2_MOUSE]	26.81	5	1	16	67	899	101.103	8.41162
D3Z4U0	Zinc finger Ran-binding domain-containing protein 2 OS=Mus musculus GN=Zranb2 PE=1 SV=2 - [D3Z4U0_MOUSE]	6.25	2	3	3	8	320	36.2595	9.67139
G3UY38	Heterogeneous nuclear ribonucleoprotein L OS=Mus musculus GN=Hnrnpl PE=1 SV=1 - [G3UY38_MOUSE]	19.08	3	7	7	20	456	50.5325	7.50342
A0A067XG53	Peripheral plasma membrane protein CASK (Fragment) OS=Mus musculus GN=Cask PE=1 SV=1 - [A0A067XG53_MOUSE]	3.67	2	2	2	4	871	99.1644	6.62451
G3UYU6	Receptor-type tyrosine-protein phosphatase delta OS=Mus musculus GN=Ptprd PE=1 SV=1 - [G3UYU6_MOUSE]	5.82	10	5	6	11	1495	168.24	6.65381
E9Q704	Peptidyl-glycine alpha-amidating monooxygenase OS=Mus musculus GN=Pam PE=1 SV=1 - [E9Q704_MOUSE]	14.43	4	6	6	20	873	97.1146	6.7417
E9Q2C4	Type II inositol 3,4-bisphosphate 4-phosphatase (Fragment) OS=Mus musculus GN=Inpp4b PE=1 SV=1 - [E9Q2C4_MOUSE]	3.95	6	1	1	2	633	71.7034	5.79541
A0A0G2JFK2	Far upstream element-binding protein 1 (Fragment) OS=Mus musculus GN=Fubp1 PE=1 SV=1 - [A0A0G2JFK2_MOUSE]	32.03	7	5	7	16	306	32.4252	6.26514
A0A0R4J098	DBIRD complex subunit ZNF326 OS=Mus musculus GN=Zfp326 PE=1 SV=1 - [A0A0R4J098_MOUSE]	8.1	3	3	3	5	580	65.1265	5.21143
A2AN84	55 kDa erythrocyte membrane protein OS=Mus musculus GN=Mpp1 PE=1 SV=1 - [A2AN84_MOUSE]	10.4	5	4	4	8	452	50.504	9.18799
E9Q0U7	Heat shock protein 105 kDa OS=Mus musculus GN=Hsph1 PE=1 SV=1 - [E9Q0U7_MOUSE]	21.54	5	12	14	67	817	91.62	5.59229
G3UZ60	Small ubiquitin-related modifier 3 OS=Mus musculus GN=Sumo3 PE=1 SV=1 - [G3UZ60_MOUSE]	30.67	10	2	2	3	75	8.59637	9.20264
A0A075B6D7	Phosphatidylinositol 4,5-bisphosphate 5-phosphatase A OS=Mus musculus GN=Inpp5j PE=1 SV=1 - [A0A075B6D7_MOUSE]	6.23	2	2	2	6	899	96.7466	9.43701
D6RGM3	Echinoderm microtubule-associated protein-like 2 OS=Mus musculus GN=Eml2 PE=1 SV=1 - [D6RGM3_MOUSE]	7.73	5	2	2	3	427	46.7166	6.62451
E9Q7S0	Synaptojanin-1 OS=Mus musculus GN=Synj1 PE=1 SV=1 - [E9Q7S0_MOUSE]	8.94	7	8	8	22	1309	144.505	7.34229
E9Q7L0	Protein Ogdhl OS=Mus musculus GN=Ogdhl PE=1 SV=1 - [E9Q7L0_MOUSE]	22.93	1	15	17	49	1029	116.526	6.84424
D3Z4F9	Protein C-ets-2 (Fragment) OS=Mus musculus GN=Ets2 PE=4 SV=1 - [D3Z4F9_MOUSE]	9.22	2	1	1	2	282	31.4321	4.89404
D3Z6I8	Tropomyosin alpha-3 chain OS=Mus musculus GN=Tpm3 PE=1 SV=1 - [D3Z6I8_MOUSE]	62.35	4	2	15	33	247	28.7058	4.79248
E9Q3M9	Protein 2010300C02Rik OS=Mus musculus GN=2010300C02Rik PE=1 SV=1 - [E9Q3M9_MOUSE]	12	2	7	8	15	1175	125.832	7.37158
D3Z1U9	NADH dehydrogenase [ubiquinone] flavoprotein 1, mitochondrial OS=Mus musculus GN=Ndufv1 PE=1 SV=1 - [D3Z1U9_MOUSE]	27.27	3	6	6	24	385	41.8069	6.96143
G3UWM5	Rho GTPase-activating protein 21 (Fragment) OS=Mus musculus GN=Arhgap21 PE=1 SV=1 - [G3UWM5_MOUSE]	2.38	5	1	2	3	1263	141.201	7.60596
E9Q7Q3	Tropomyosin alpha-3 chain OS=Mus musculus GN=Tpm3 PE=1 SV=1 - [E9Q7Q3_MOUSE]	59.68	4	1	14	36	248	28.7167	4.71631
E9PY16	Protein Adap1 OS=Mus musculus GN=Adap1 PE=1 SV=1 - [E9PY16_MOUSE]	14.97	1	5	5	6	374	43.3428	8.646
E9Q5J9	Tropomyosin alpha-3 chain OS=Mus musculus GN=Tpm3 PE=1 SV=1 - [E9Q5J9_MOUSE]	40.7	4	2	8	77	285	33.2598	4.76709
A0A0G2JDL3	Cyclin-dependent-like kinase 5 OS=Mus musculus GN=Cdk5 PE=1 SV=1 - [A0A0G2JDL3_MOUSE]	13.08	2	2	2	10	260	29.5091	6.41748
H3BKQ7	Protein Ppp1r9a OS=Mus musculus GN=Ppp1r9a PE=1 SV=1 - [H3BKQ7_MOUSE]	12.46	9	7	7	12	955	107.105	5.09717
E9PYA3	Hydroxyacylglutathione hydrolase, mitochondrial (Fragment) OS=Mus musculus GN=Hagh PE=1 SV=1 - [E9PYA3_MOUSE]	32.91	5	8	8	16	237	25.9832	8.44092
Z4YJV4	2-oxoglutarate dehydrogenase, mitochondrial OS=Mus musculus GN=Ogdh PE=1 SV=1 - [Z4YJV4_MOUSE]	19.14	3	11	13	33	1019	115.953	6.97607
A0A0R4J2B0	CUGBP Elav-like family member 2 OS=Mus musculus GN=Celf2 PE=1 SV=1 - [A0A0R4J2B0_MOUSE]	21.36	11	7	10	29	440	46.5783	8.98291
Q91VB8	Alpha globin 1 OS=Mus musculus GN=Hba-a1 PE=1 SV=1 - [Q91VB8_MOUSE]	74.65	2	14	14	425	142	15.1028	8.22119
Q3UGB5	DAZ associated protein 1, isoform CRA_b OS=Mus musculus GN=Dazap1 PE=1 SV=1 - [Q3UGB5_MOUSE]	10.34	3	2	2	5	406	43.13	8.55811
A2AE27	AMP deaminase 2 OS=Mus musculus GN=Ampd2 PE=1 SV=1 - [A2AE27_MOUSE]	3.64	2	2	2	3	824	94.6359	6.50732
Q6P6I8	Signal-regulatory protein alpha OS=Mus musculus GN=Sirpa PE=1 SV=1 - [Q6P6I8_MOUSE]	18.66	8	7	8	40	509	55.9514	8.27979
Q68FG2	Protein Sptbn2 OS=Mus musculus GN=Sptbn2 PE=1 SV=1 - [Q68FG2_MOUSE]	15.33	1	26	28	102	2388	270.756	5.85889
D3YWT1	MCG11326, isoform CRA_b OS=Mus musculus GN=Hnrnph3 PE=1 SV=1 - [D3YWT1_MOUSE]	7.85	2	2	2	4	331	35.1594	6.87354
G3XA16	Calcium binding protein 2, isoform CRA_a OS=Mus musculus GN=Cabp2 PE=4 SV=1 - [G3XA16_MOUSE]	14.29	4	1	1	2	168	19.2174	4.60205
G5E8J2	Ankyrin 1, erythroid OS=Mus musculus GN=Ank1 PE=1 SV=1 - [G5E8J2_MOUSE]	11.15	12	11	12	35	1848	202.394	6.65381
Q7M739	Nuclear pore complex-associated intranuclear coiled-coil protein TPR OS=Mus musculus GN=Tpr PE=1 SV=1 - [Q7M739_MOUSE]	6.58	3	9	9	17	2357	266.764	5.0083
Q3TJ22	Angio-associated migratory protein OS=Mus musculus GN=Aamp PE=1 SV=1 - [Q3TJ22_MOUSE]	7.13	3	2	2	3	435	46.8654	4.41162
G3X9L6	MCG55033 OS=Mus musculus GN=Gm10250 PE=4 SV=1 - [G3X9L6_MOUSE]	81.25	3	16	16	114	160	18.6095	5.43994
Q99J77	N-acetylneuraminic acid synthase (Sialic acid synthase) OS=Mus musculus GN=Nans PE=1 SV=1 - [Q99J77_MOUSE]	4.74	1	1	1	2	359	39.9984	7.06396
Q91YS7	Dual-specificity mitogen-activated protein kinase kinase 2 OS=Mus musculus GN=Map2k2 PE=1 SV=1 - [Q91YS7_MOUSE]	9	3	1	3	14	400	44.275	7.04932
Q91WH7	Sodium/potassium-transporting ATPase subunit alpha OS=Mus musculus GN=Atp4a PE=1 SV=1 - [Q91WH7_MOUSE]	12.78	3	5	9	39	1025	112.963	5.80811
A2AJ72	MCG130458 OS=Mus musculus GN=Fubp3 PE=1 SV=1 - [A2AJ72_MOUSE]	4.92	3	1	2	5	569	61.4093	8.27979
Q3UW66	Sulfurtransferase OS=Mus musculus GN=Mpst PE=1 SV=1 - [Q3UW66_MOUSE]	11.78	2	2	2	5	297	33.0765	6.46826
Q8JZN2	Cold shock domain-containing protein E1 OS=Mus musculus GN=Csde1 PE=1 SV=1 - [Q8JZN2_MOUSE]	11.34	3	7	7	19	767	85.5993	6.32861
Q3UYN2	Copine-6 OS=Mus musculus GN=Cpne6 PE=1 SV=1 - [Q3UYN2_MOUSE]	17.45	3	6	6	13	556	61.6135	5.50342
G5E8R3	Pyruvate carboxylase OS=Mus musculus GN=Pcx PE=1 SV=1 - [G5E8R3_MOUSE]	21.05	3	18	18	35	1178	129.618	6.7124
G3UX26	Voltage-dependent anion-selective channel protein 2 (Fragment) OS=Mus musculus GN=Vdac2 PE=1 SV=1 - [G3UX26_MOUSE]	53	4	12	12	55	283	30.427	7.57666
E9QMC2	Metabotropic glutamate receptor 5 OS=Mus musculus GN=Grm5 PE=1 SV=1 - [E9QMC2_MOUSE]	2.39	2	1	2	3	1171	128.187	7.57666
G3UW57	RAB11 family interacting protein 2 (Class I), isoform CRA_a OS=Mus musculus GN=Rab11fip2 PE=1 SV=1 - [G3UW57_MOUSE]	10.27	2	2	2	2	370	41.743	9.34912
Q3TGS9	ADP-ribosylation factor GTPase-activating protein 1 OS=Mus musculus GN=Arfgap1 PE=1 SV=1 - [Q3TGS9_MOUSE]	39.09	4	9	9	37	394	43.1574	5.5415
Q5PR72	Phosphodiesterase OS=Mus musculus GN=Pde2a PE=1 SV=1 - [Q5PR72_MOUSE]	7.91	5	3	3	6	935	105.179	5.41455
Q3U2G2	Heat shock 70 kDa protein 4 OS=Mus musculus GN=Hspa4 PE=1 SV=1 - [Q3U2G2_MOUSE]	37.41	1	1	25	106	842	94.1494	5.21143
G3UVV4	Hexokinase 1, isoform CRA_f OS=Mus musculus GN=Hk1 PE=1 SV=1 - [G3UVV4_MOUSE]	38.93	13	28	28	103	917	101.808	6.66846
E0CY19	cAMP-regulated phosphoprotein 21 (Fragment) OS=Mus musculus GN=Arpp21 PE=1 SV=8 - [E0CY19_MOUSE]	11.46	8	1	1	18	96	10.4612	4.94482
H3BKR7	Phosphatidate cytidylyltransferase 2 OS=Mus musculus GN=Cds2 PE=1 SV=1 - [H3BKR7_MOUSE]	39.29	1	1	1	1	56	6.54904	4.79248
E9Q7D8	Poly(rC)-binding protein 3 OS=Mus musculus GN=Pcbp3 PE=1 SV=1 - [E9Q7D8_MOUSE]	41.15	2	2	8	50	226	24.1015	8.86572
A0A0G2JH07	Paired immunoglobulin-like type 2 receptor beta (Fragment) OS=Mus musculus GN=Pilrb1 PE=4 SV=1 - [A0A0G2JH07_MOUSE]	21.74	1	1	1	4	69	7.0366	5.66846
E9Q0W6	Actin-binding LIM protein 2 OS=Mus musculus GN=Ablim2 PE=1 SV=1 - [E9Q0W6_MOUSE]	27.18	8	8	8	15	607	67.2426	7.98682
E9PZB3	Protein Gm5093 OS=Mus musculus GN=Gm5093 PE=1 SV=1 - [E9PZB3_MOUSE]	26.44	4	7	7	13	174	19.8634	9.51025
E9QPX3	NADH dehydrogenase [ubiquinone] iron-sulfur protein 4, mitochondrial OS=Mus musculus GN=Ndufs4 PE=1 SV=1 - [E9QPX3_MOUSE]	20.57	2	3	3	4	175	19.7902	9.99365
S4R1K4	Ankyrin repeat and sterile alpha motif domain-containing protein 1B (Fragment) OS=Mus musculus GN=Anks1b PE=1 SV=1 - [S4R1K4_MOUSE]	12.5	14	1	1	2	128	14.6338	9.99365
D3Z396	Neurotrimin OS=Mus musculus GN=Ntm PE=1 SV=1 - [D3Z396_MOUSE]	29.75	5	6	8	27	316	34.9327	6.96143
A0A0U1RPI1	Phospholemman OS=Mus musculus GN=Fxyd1 PE=1 SV=1 - [A0A0U1RPI1_MOUSE]	17.91	2	1	1	2	67	7.5967	8.55811
A0A0J9YTX3	Transcription factor 4 (Fragment) OS=Mus musculus GN=Tcf4 PE=1 SV=1 - [A0A0J9YTX3_MOUSE]	6	1	1	1	4	100	10.4295	6.94678
V9GWT6	ELKS/Rab6-interacting/CAST family member 1 OS=Mus musculus GN=Erc1 PE=1 SV=1 - [V9GWT6_MOUSE]	8.02	7	5	7	14	948	108.781	6.60986
E9Q456	Tropomyosin alpha-1 chain OS=Mus musculus GN=Tpm1 PE=1 SV=1 - [E9Q456_MOUSE]	48.39	8	1	11	36	248	28.6506	4.76709
A0A087WS46	Elongation factor 1-beta OS=Mus musculus GN=Eef1b2 PE=1 SV=1 - [A0A087WS46_MOUSE]	25.54	2	5	5	33	184	20.124	4.56396
D3Z0Y2	Peroxiredoxin-6 OS=Mus musculus GN=Prdx6 PE=1 SV=1 - [D3Z0Y2_MOUSE]	53.5	4	12	12	40	200	22.4799	8.88037
A0A0A6YWP5	Tumor suppressor candidate 2 OS=Mus musculus GN=Tusc2 PE=1 SV=1 - [A0A0A6YWP5_MOUSE]	24.51	2	1	1	4	102	11.1988	9.5249
G5E839	T-complex protein 1 subunit delta OS=Mus musculus GN=Cct4 PE=1 SV=1 - [G5E839_MOUSE]	27.11	3	8	9	32	509	54.8271	8.01611
A0A0N4SVC3	Olfactory receptor OS=Mus musculus GN=Gm44444 PE=3 SV=1 - [A0A0N4SVC3_MOUSE]	8.33	2	1	1	2	312	35.5219	9.0708
A0A140LJF7	Ryanodine receptor 3 OS=Mus musculus GN=Ryr3 PE=1 SV=1 - [A0A140LJF7_MOUSE]	0.29	4	1	1	2	4858	550.481	5.79541
A2AJ38	Protein Gm13941 (Fragment) OS=Mus musculus GN=Gm13941 PE=4 SV=1 - [A2AJ38_MOUSE]	8.57	1	1	1	2	245	26.8972	5.87158
A0A0N4SW94	Myeloid-associated differentiation marker (Fragment) OS=Mus musculus GN=Myadm PE=1 SV=1 - [A0A0N4SW94_MOUSE]	20.99	2	1	1	4	81	8.63453	8.38232
E9Q1V9	Calcium/calmodulin-dependent protein kinase type II subunit delta OS=Mus musculus GN=Camk2d PE=1 SV=2 - [E9Q1V9_MOUSE]	25.82	10	6	13	65	488	55.258	7.56201
P05202	Aspartate aminotransferase, mitochondrial OS=Mus musculus GN=Got2 PE=1 SV=1 - [AATM_MOUSE]	50.93	1	22	22	92	430	47.3812	8.99756
P57780	Alpha-actinin-4 OS=Mus musculus GN=Actn4 PE=1 SV=1 - [ACTN4_MOUSE]	7.68	4	3	8	31	912	104.911	5.41455
P22892	AP-1 complex subunit gamma-1 OS=Mus musculus GN=Ap1g1 PE=1 SV=3 - [AP1G1_MOUSE]	2.07	2	1	1	1	822	91.2921	6.80029
P48036	Annexin A5 OS=Mus musculus GN=Anxa5 PE=1 SV=1 - [ANXA5_MOUSE]	13.48	2	4	4	13	319	35.7302	4.95752
P56212	cAMP-regulated phosphoprotein 19 OS=Mus musculus GN=Arpp19 PE=1 SV=2 - [ARP19_MOUSE]	25.89	3	1	3	4	112	12.2853	9.08545
P14231	Sodium/potassium-transporting ATPase subunit beta-2 OS=Mus musculus GN=Atp1b2 PE=1 SV=2 - [AT1B2_MOUSE]	31.38	2	5	5	49	290	33.3225	8.30908
Q9DB20	ATP synthase subunit O, mitochondrial OS=Mus musculus GN=Atp5o PE=1 SV=1 - [ATPO_MOUSE]	53.05	3	14	14	99	213	23.3487	9.99365
Q9Z1W8	Potassium-transporting ATPase alpha chain 2 OS=Mus musculus GN=Atp12a PE=1 SV=3 - [AT12A_MOUSE]	12.95	1	4	12	47	1035	114.654	6.32861
Q80WR5	UPF0688 protein C1orf174 homolog OS=Mus musculus PE=1 SV=1 - [CA174_MOUSE]	20	2	2	2	7	230	24.7591	6.03662
P40124	Adenylyl cyclase-associated protein 1 OS=Mus musculus GN=Cap1 PE=1 SV=4 - [CAP1_MOUSE]	20.46	1	6	6	10	474	51.5324	7.51807
P24270	Catalase OS=Mus musculus GN=Cat PE=1 SV=4 - [CATA_MOUSE]	19.17	2	6	6	11	527	59.7577	7.88428
P30658	Chromobox protein homolog 2 OS=Mus musculus GN=Cbx2 PE=1 SV=2 - [CBX2_MOUSE]	4.05	1	2	2	2	519	54.8846	9.94971
Q8K354	Carbonyl reductase [NADPH] 3 OS=Mus musculus GN=Cbr3 PE=1 SV=1 - [CBR3_MOUSE]	37.55	1	6	7	15	277	30.9339	6.56592
P47757	F-actin-capping protein subunit beta OS=Mus musculus GN=Capzb PE=1 SV=3 - [CAPZB_MOUSE]	22.38	5	5	5	6	277	31.3258	5.74463
P56391	Cytochrome c oxidase subunit 6B1 OS=Mus musculus GN=Cox6b1 PE=1 SV=2 - [CX6B1_MOUSE]	83.72	2	11	11	70	86	10.0649	8.71924
P60840	Alpha-endosulfine OS=Mus musculus GN=Ensa PE=1 SV=1 - [ENSA_MOUSE]	36.36	2	2	4	9	121	13.3267	7.23975
Q8CBY0	Glutamyl-tRNA(Gln) amidotransferase subunit C, mitochondrial OS=Mus musculus GN=Gatc PE=1 SV=1 - [GATC_MOUSE]	27.74	1	2	2	2	155	16.6564	5.16064
P62881	Guanine nucleotide-binding protein subunit beta-5 OS=Mus musculus GN=Gnb5 PE=1 SV=1 - [GBB5_MOUSE]	13.67	1	4	4	10	395	43.5369	6.45557
Q91Z53	Glyoxylate reductase/hydroxypyruvate reductase OS=Mus musculus GN=Grhpr PE=1 SV=1 - [GRHPR_MOUSE]	26.22	2	5	5	20	328	35.3065	7.6499
Q64433	10 kDa heat shock protein, mitochondrial OS=Mus musculus GN=Hspe1 PE=1 SV=2 - [CH10_MOUSE]	80.39	1	10	10	90	102	10.9559	8.35303
O89053	Coronin-1A OS=Mus musculus GN=Coro1a PE=1 SV=5 - [COR1A_MOUSE]	29.5	3	9	9	16	461	50.9569	6.48096
P45591	Cofilin-2 OS=Mus musculus GN=Cfl2 PE=1 SV=1 - [COF2_MOUSE]	57.83	1	8	13	50	166	18.6978	7.88428
Q06890	Clusterin OS=Mus musculus GN=Clu PE=1 SV=1 - [CLUS_MOUSE]	20.54	6	7	7	12	448	51.6226	5.66846
P00015	Cytochrome c, testis-specific OS=Mus musculus GN=Cyct PE=1 SV=3 - [CYC2_MOUSE]	23.81	1	4	6	21	105	11.706	9.51025
Q9D735	Uncharacterized protein C19orf43 homolog OS=Mus musculus PE=1 SV=1 - [CS043_MOUSE]	32.37	1	2	2	2	173	18.3653	9.67139
Q8R1Q8	Cytoplasmic dynein 1 light intermediate chain 1 OS=Mus musculus GN=Dync1li1 PE=1 SV=1 - [DC1L1_MOUSE]	20.65	1	6	6	13	523	56.5791	6.41748
Q9Z2W0	Aspartyl aminopeptidase OS=Mus musculus GN=Dnpep PE=1 SV=2 - [DNPEP_MOUSE]	21.35	3	7	7	8	473	52.1738	7.25439
Q9CR98	Protein FAM136A OS=Mus musculus GN=Fam136a PE=1 SV=1 - [F136A_MOUSE]	59.42	3	7	7	14	138	15.6635	7.60596
Q05816	Fatty acid-binding protein, epidermal OS=Mus musculus GN=Fabp5 PE=1 SV=3 - [FABP5_MOUSE]	69.63	1	8	8	119	135	15.1274	6.53662
Q62446	Peptidyl-prolyl cis-trans isomerase FKBP3 OS=Mus musculus GN=Fkbp3 PE=1 SV=2 - [FKBP3_MOUSE]	5.8	1	1	1	1	224	25.1323	9.27588
P50396	Rab GDP dissociation inhibitor alpha OS=Mus musculus GN=Gdi1 PE=1 SV=3 - [GDIA_MOUSE]	46.98	3	16	21	103	447	50.4891	5.08447
Q07079	Insulin-like growth factor-binding protein 5 OS=Mus musculus GN=Igfbp5 PE=1 SV=1 - [IBP5_MOUSE]	5.17	1	1	1	1	271	30.3518	8.11865
O88844	Isocitrate dehydrogenase [NADP] cytoplasmic OS=Mus musculus GN=Idh1 PE=1 SV=2 - [IDHC_MOUSE]	46.14	5	15	15	31	414	46.6445	7.1665
Q9CZ44	NSFL1 cofactor p47 OS=Mus musculus GN=Nsfl1c PE=1 SV=1 - [NSF1C_MOUSE]	20.27	2	4	4	15	370	40.6854	5.14795
Q80ZQ5	Juxtaposed with another zinc finger protein 1 OS=Mus musculus GN=Jazf1 PE=1 SV=2 - [JAZF1_MOUSE]	3.29	1	1	1	1	243	27.0803	8.35303
Q8C078	Calcium/calmodulin-dependent protein kinase kinase 2 OS=Mus musculus GN=Camkk2 PE=1 SV=2 - [KKCC2_MOUSE]	12.41	5	5	5	14	588	64.5765	5.89697
Q9ERR1	Nuclear distribution protein nudE-like 1 OS=Mus musculus GN=Ndel1 PE=1 SV=2 - [NDEL1_MOUSE]	16.81	3	5	5	12	345	38.3424	5.23682
Q91WS2	NACHT, LRR and PYD domains-containing protein 6 OS=Mus musculus GN=Nlrp6 PE=2 SV=3 - [NLRP6_MOUSE]	1.5	2	1	1	2	869	97.3405	8.42627
Q9QYF9	Protein NDRG3 OS=Mus musculus GN=Ndrg3 PE=1 SV=1 - [NDRG3_MOUSE]	26.4	3	6	6	15	375	41.5285	5.24951
P15532	Nucleoside diphosphate kinase A OS=Mus musculus GN=Nme1 PE=1 SV=1 - [NDKA_MOUSE]	67.11	5	10	10	25	152	17.1969	7.37158
P09405	Nucleolin OS=Mus musculus GN=Ncl PE=1 SV=2 - [NUCL_MOUSE]	7.92	1	3	3	7	707	76.6768	4.75439
P63054	Purkinje cell protein 4 OS=Mus musculus GN=Pcp4 PE=3 SV=2 - [PCP4_MOUSE]	45.16	2	5	5	20	62	6.80329	6.7124
P49443	Protein phosphatase 1A OS=Mus musculus GN=Ppm1a PE=1 SV=1 - [PPM1A_MOUSE]	24.08	1	4	5	14	382	42.4057	5.36377
E9PUL5	Proline-rich transmembrane protein 2 OS=Mus musculus GN=Prrt2 PE=1 SV=1 - [PRRT2_MOUSE]	3.76	1	1	1	1	346	35.9019	4.62744
Q5SUR0	Phosphoribosylformylglycinamidine synthase OS=Mus musculus GN=Pfas PE=1 SV=1 - [PUR4_MOUSE]	12.79	2	8	8	11	1337	144.538	5.66846
P61021	Ras-related protein Rab-5B OS=Mus musculus GN=Rab5b PE=1 SV=1 - [RAB5B_MOUSE]	6.51	1	1	1	2	215	23.6919	8.1333
P35278	Ras-related protein Rab-5C OS=Mus musculus GN=Rab5c PE=1 SV=2 - [RAB5C_MOUSE]	18.06	2	3	3	11	216	23.3978	8.41162
Q9CQR2	40S ribosomal protein S21 OS=Mus musculus GN=Rps21 PE=1 SV=1 - [RS21_MOUSE]	38.55	1	5	5	12	83	9.13555	8.51416
P14206	40S ribosomal protein SA OS=Mus musculus GN=Rpsa PE=1 SV=4 - [RSSA_MOUSE]	21.69	1	6	6	26	295	32.8174	4.86865
Q8BP47	Asparagine--tRNA ligase, cytoplasmic OS=Mus musculus GN=Nars PE=1 SV=2 - [SYNC_MOUSE]	10.2	1	3	3	4	559	64.238	5.85889
P11031	Activated RNA polymerase II transcriptional coactivator p15 OS=Mus musculus GN=Sub1 PE=1 SV=3 - [TCP4_MOUSE]	40.16	3	3	3	7	127	14.4184	9.59814
Q93092	Transaldolase OS=Mus musculus GN=Taldo1 PE=1 SV=2 - [TALDO_MOUSE]	24.04	2	9	9	16	337	37.3634	7.03467
P01831	Thy-1 membrane glycoprotein OS=Mus musculus GN=Thy1 PE=1 SV=1 - [THY1_MOUSE]	16.05	1	3	3	12	162	18.0685	8.96826
Q921H8	3-ketoacyl-CoA thiolase A, peroxisomal OS=Mus musculus GN=Acaa1a PE=1 SV=1 - [THIKA_MOUSE]	37.26	6	9	9	21	424	43.9257	8.44092
Q9WVA2	Mitochondrial import inner membrane translocase subunit Tim8 A OS=Mus musculus GN=Timm8a1 PE=1 SV=1 - [TIM8A_MOUSE]	59.79	2	7	7	29	97	11.0353	5.16064
Q9CYG7	Mitochondrial import receptor subunit TOM34 OS=Mus musculus GN=Tomm34 PE=1 SV=1 - [TOM34_MOUSE]	27.18	1	5	5	11	309	34.2568	9.14404
Q9CR68	Cytochrome b-c1 complex subunit Rieske, mitochondrial OS=Mus musculus GN=Uqcrfs1 PE=1 SV=1 - [UCRI_MOUSE]	44.89	1	8	8	27	274	29.3492	8.70459
P50516	V-type proton ATPase catalytic subunit A OS=Mus musculus GN=Atp6v1a PE=1 SV=2 - [VATA_MOUSE]	42.46	3	24	24	204	617	68.2826	5.57959
Q3UVL4	Vacuolar protein sorting-associated protein 51 homolog OS=Mus musculus GN=Vps51 PE=1 SV=2 - [VPS51_MOUSE]	5.12	1	3	3	4	782	86.1333	6.23975
A0A087WNV1	Arf-GAP domain and FG repeat-containing protein 1 OS=Mus musculus GN=Agfg1 PE=1 SV=1 - [A0A087WNV1_MOUSE]	9.21	5	2	2	2	521	53.9413	8.92432
A0A0J9YUM4	C-terminal-binding protein 1 OS=Mus musculus GN=Ctbp1 PE=1 SV=1 - [A0A0J9YUM4_MOUSE]	40.95	8	10	10	19	337	36.9831	6.7417
D3YU17	Nicalin OS=Mus musculus GN=Ncln PE=1 SV=1 - [D3YU17_MOUSE]	4.09	2	2	2	2	562	62.7404	6.49365
A2AKH7	Leucine-rich repeat-containing protein 57 (Fragment) OS=Mus musculus GN=Lrrc57 PE=1 SV=8 - [A2AKH7_MOUSE]	33.49	4	4	4	7	218	24.117	7.94287
Q5SQB0	Nucleophosmin OS=Mus musculus GN=Npm1 PE=1 SV=1 - [Q5SQB0_MOUSE]	24.62	5	6	6	31	264	29.5062	4.58936
A0A0J9YUD8	High mobility group protein B1 OS=Mus musculus GN=Hmgb1 PE=1 SV=1 - [A0A0J9YUD8_MOUSE]	19.88	3	2	2	2	171	19.7611	9.71533
E9QLH4	E3 ubiquitin-protein ligase TRIM9 OS=Mus musculus GN=Trim9 PE=1 SV=1 - [E9QLH4_MOUSE]	9.77	3	4	4	5	788	87.4914	6.91748
A2A6Q8	Myosin light chain 4 (Fragment) OS=Mus musculus GN=Myl4 PE=1 SV=8 - [A2A6Q8_MOUSE]	6.81	3	1	1	1	191	21.0315	5.03369
E9QLL2	Dynamin-3 OS=Mus musculus GN=Dnm3 PE=1 SV=1 - [E9QLL2_MOUSE]	9.62	4	2	6	9	863	97.2127	8.55811
A0A0R4J2B2	BTB/POZ domain-containing protein KCTD12 OS=Mus musculus GN=Kctd12 PE=1 SV=1 - [A0A0R4J2B2_MOUSE]	12.23	2	3	3	4	327	35.8658	5.80811
F8WIR1	Cathepsin D OS=Mus musculus GN=Ctsd PE=1 SV=2 - [F8WIR1_MOUSE]	20.3	4	6	6	15	404	44.1867	7.37158
A0A0A6YW88	CaM kinase-like vesicle-associated protein OS=Mus musculus GN=Camkv PE=1 SV=1 - [A0A0A6YW88_MOUSE]	13.64	2	3	3	8	484	51.6428	5.45264
Q3UW43	Protein Spag11b OS=Mus musculus GN=Spag11b PE=2 SV=1 - [Q3UW43_MOUSE]	21.11	1	1	1	1	90	9.99429	10.5063
A1BN54	Alpha actinin 1a OS=Mus musculus GN=Actn1 PE=1 SV=1 - [A1BN54_MOUSE]	9.47	5	4	9	22	887	102.655	5.47803
Q3U0I3	T-complex protein 1 subunit gamma OS=Mus musculus GN=Cct3 PE=1 SV=1 - [Q3U0I3_MOUSE]	39.92	4	16	16	34	521	58.2412	7.25439
Q9CQB4	Cytochrome b-c1 complex subunit 7 OS=Mus musculus GN=Uqcrb PE=1 SV=1 - [Q9CQB4_MOUSE]	54.05	2	7	7	37	111	13.5529	9.11475
A0A0N4SUT0	MCG13108, isoform CRA_b OS=Mus musculus GN=Lsm5 PE=1 SV=1 - [A0A0N4SUT0_MOUSE]	45.76	2	1	1	2	59	6.37425	4.14502
G3UYV7	40S ribosomal protein S28 (Fragment) OS=Mus musculus GN=Rps28 PE=1 SV=1 - [G3UYV7_MOUSE]	62.5	3	2	2	20	56	6.34037	9.96436
Q5SW87	Protein Rab1a OS=Mus musculus GN=Rab1a PE=1 SV=1 - [Q5SW87_MOUSE]	31.88	4	3	3	7	138	15.0156	8.1333
A2AQC3	Phospholipid-transporting ATPase OS=Mus musculus GN=Atp9a PE=1 SV=1 - [A2AQC3_MOUSE]	1.18	1	1	1	1	1105	124.381	8.20654
A0A0N4SV66	Histone H2A OS=Mus musculus GN=H2afj PE=1 SV=1 - [A0A0N4SV66_MOUSE]	41.27	17	5	5	27	126	13.6517	11.019
A0A140T8L5	Protein Rps2-ps6 OS=Mus musculus GN=Rps2-ps6 PE=3 SV=1 - [A0A140T8L5_MOUSE]	26.7	8	6	6	9	221	24.185	9.78857
F6SVV1	Protein Gm9493 OS=Mus musculus GN=Gm9493 PE=4 SV=1 - [F6SVV1_MOUSE]	28.65	2	5	5	14	192	21.8692	10.0229
F8WJK8	Hsc70-interacting protein OS=Mus musculus GN=St13 PE=1 SV=1 - [F8WJK8_MOUSE]	10.22	4	4	4	5	362	40.513	5.30029
K3W4T3	V-type proton ATPase subunit a OS=Mus musculus GN=Atp6v0a1 PE=1 SV=1 - [K3W4T3_MOUSE]	14.2	3	11	11	37	838	96.3642	6.84424
P63216	Guanine nucleotide-binding protein G(I)/G(S)/G(O) subunit gamma-3 OS=Mus musculus GN=Gng3 PE=1 SV=1 - [GBG3_MOUSE]	41.33	1	2	2	2	75	8.29916	7.78174
Q60605	Myosin light polypeptide 6 OS=Mus musculus GN=Myl6 PE=1 SV=3 - [MYL6_MOUSE]	58.94	7	6	6	25	151	16.9191	4.65283
P62320	Small nuclear ribonucleoprotein Sm D3 OS=Mus musculus GN=Snrpd3 PE=1 SV=1 - [SMD3_MOUSE]	10.32	1	2	2	3	126	13.9073	10.3159
P84228	Histone H3.2 OS=Mus musculus GN=Hist1h3b PE=1 SV=2 - [H32_MOUSE]	28.68	3	1	2	3	136	15.3785	11.2681
P61161	Actin-related protein 2 OS=Mus musculus GN=Actr2 PE=1 SV=1 - [ARP2_MOUSE]	5.84	1	2	2	2	394	44.7322	6.7417
B2RSH2	Guanine nucleotide-binding protein G(i) subunit alpha-1 OS=Mus musculus GN=Gnai1 PE=1 SV=1 - [GNAI1_MOUSE]	26.27	7	3	8	27	354	40.3352	5.97314
Q99JI6	Ras-related protein Rap-1b OS=Mus musculus GN=Rap1b PE=1 SV=2 - [RAP1B_MOUSE]	19.57	2	1	3	7	184	20.8116	5.78271
P62830	60S ribosomal protein L23 OS=Mus musculus GN=Rpl23 PE=1 SV=1 - [RL23_MOUSE]	45.71	2	5	5	10	140	14.8561	10.5063
P62192	26S protease regulatory subunit 4 OS=Mus musculus GN=Psmc1 PE=1 SV=1 - [PRS4_MOUSE]	14.77	1	4	5	9	440	49.1537	6.21436
P62334	26S protease regulatory subunit 10B OS=Mus musculus GN=Psmc6 PE=1 SV=1 - [PRS10_MOUSE]	26.99	1	8	8	27	389	44.1451	7.48877
Q80WC7	Arf-GAP domain and FG repeat-containing protein 2 OS=Mus musculus GN=Agfg2 PE=1 SV=1 - [AGFG2_MOUSE]	16.7	3	3	3	11	479	48.9374	9.1001
P55264	Adenosine kinase OS=Mus musculus GN=Adk PE=1 SV=2 - [ADK_MOUSE]	3.32	1	1	1	2	361	40.1235	6.21436
Q9R1V7	Disintegrin and metalloproteinase domain-containing protein 23 OS=Mus musculus GN=Adam23 PE=1 SV=1 - [ADA23_MOUSE]	8.69	2	5	5	7	829	91.4884	7.6792
Q9D898	Actin-related protein 2/3 complex subunit 5-like protein OS=Mus musculus GN=Arpc5l PE=1 SV=1 - [ARP5L_MOUSE]	30.07	1	5	5	12	153	16.9698	6.80029
P56135	ATP synthase subunit f, mitochondrial OS=Mus musculus GN=Atp5j2 PE=1 SV=3 - [ATPK_MOUSE]	32.95	2	4	4	18	88	10.3374	9.94971
P24288	Branched-chain-amino-acid aminotransferase, cytosolic OS=Mus musculus GN=Bcat1 PE=1 SV=2 - [BCAT1_MOUSE]	10.62	6	3	3	4	386	42.7636	5.38916
Q9D8S9	BolA-like protein 1 OS=Mus musculus GN=Bola1 PE=1 SV=1 - [BOLA1_MOUSE]	39.42	1	3	3	6	137	14.3703	8.76318
Q6ZQ38	Cullin-associated NEDD8-dissociated protein 1 OS=Mus musculus GN=Cand1 PE=1 SV=2 - [CAND1_MOUSE]	7.64	2	5	5	24	1230	136.245	5.78271
Q80U49	Centrosomal protein of 170 kDa protein B OS=Mus musculus GN=Cep170b PE=1 SV=2 - [C170B_MOUSE]	9.34	1	9	9	26	1574	170.718	6.87354
P33146	Cadherin-15 OS=Mus musculus GN=Cdh15 PE=1 SV=3 - [CAD15_MOUSE]	1.91	1	1	1	1	784	85.5915	4.85596
P48758	Carbonyl reductase [NADPH] 1 OS=Mus musculus GN=Cbr1 PE=1 SV=3 - [CBR1_MOUSE]	29.96	2	6	7	28	277	30.622	8.30908
Q8VE99	Coiled-coil domain-containing protein 115 OS=Mus musculus GN=Ccdc115 PE=1 SV=1 - [CC115_MOUSE]	21.11	1	2	2	2	180	19.7304	8.80713
P23198	Chromobox protein homolog 3 OS=Mus musculus GN=Cbx3 PE=1 SV=2 - [CBX3_MOUSE]	27.87	2	3	3	4	183	20.8423	5.22412
Q9CXS4	Centromere protein V OS=Mus musculus GN=Cenpv PE=1 SV=2 - [CENPV_MOUSE]	17.06	1	3	3	7	252	27.5238	9.78857
P43024	Cytochrome c oxidase subunit 6A1, mitochondrial OS=Mus musculus GN=Cox6a1 PE=1 SV=2 - [CX6A1_MOUSE]	63.96	2	4	4	8	111	12.3443	9.979
Q8BPU7	Engulfment and cell motility protein 1 OS=Mus musculus GN=Elmo1 PE=1 SV=2 - [ELMO1_MOUSE]	1.51	1	1	1	1	727	83.8817	6.27783
Q00612	Glucose-6-phosphate 1-dehydrogenase X OS=Mus musculus GN=G6pdx PE=1 SV=3 - [G6PD1_MOUSE]	2.72	1	1	1	2	515	59.2248	6.49365
Q60779	Growth arrest-specific protein 8 OS=Mus musculus GN=Gas8 PE=1 SV=2 - [GAS8_MOUSE]	1.46	1	1	1	2	478	56.2286	7.88428
Q923Z0	G-protein coupled receptor family C group 5 member B OS=Mus musculus GN=Gprc5b PE=1 SV=1 - [GPC5B_MOUSE]	10.98	2	3	3	4	410	45.8691	8.38232
Q64521	Glycerol-3-phosphate dehydrogenase, mitochondrial OS=Mus musculus GN=Gpd2 PE=1 SV=2 - [GPDM_MOUSE]	31.09	2	19	19	46	727	80.9025	6.60986
P47791	Glutathione reductase, mitochondrial OS=Mus musculus GN=Gsr PE=1 SV=3 - [GSHR_MOUSE]	22.8	1	8	8	20	500	53.6285	7.98682
P35802	Neuronal membrane glycoprotein M6-a OS=Mus musculus GN=Gpm6a PE=1 SV=1 - [GPM6A_MOUSE]	12.95	1	4	4	6	278	31.1284	5.2749
Q9CZU6	Citrate synthase, mitochondrial OS=Mus musculus GN=Cs PE=1 SV=1 - [CISY_MOUSE]	18.53	2	9	9	39	464	51.7034	8.57275
Q8R4N0	Citrate lyase subunit beta-like protein, mitochondrial OS=Mus musculus GN=Clybl PE=1 SV=2 - [CLYBL_MOUSE]	23.08	1	6	6	20	338	37.5248	8.54346
Q61908	Cx9C motif-containing protein 4 OS=Mus musculus GN=Cmc4 PE=2 SV=1 - [CMC4_MOUSE]	13.24	1	1	1	1	68	7.73776	8.38232
P19783	Cytochrome c oxidase subunit 4 isoform 1, mitochondrial OS=Mus musculus GN=Cox4i1 PE=1 SV=2 - [COX41_MOUSE]	22.49	1	2	2	19	169	19.5179	9.23193
P19536	Cytochrome c oxidase subunit 5B, mitochondrial OS=Mus musculus GN=Cox5b PE=1 SV=1 - [COX5B_MOUSE]	82.03	4	7	7	14	128	13.8039	8.38232
Q68ED7	CREB-regulated transcription coactivator 1 OS=Mus musculus GN=Crtc1 PE=1 SV=1 - [CRTC1_MOUSE]	6.51	1	3	3	10	630	66.904	6.04932
Q9EPL2	Calsyntenin-1 OS=Mus musculus GN=Clstn1 PE=1 SV=1 - [CSTN1_MOUSE]	4.49	1	3	3	7	979	108.831	4.91943
Q9Z0Y1	Dynactin subunit 3 OS=Mus musculus GN=Dctn3 PE=1 SV=2 - [DCTN3_MOUSE]	23.12	1	2	2	5	186	20.9653	6.06201
P50171	Estradiol 17-beta-dehydrogenase 8 OS=Mus musculus GN=Hsd17b8 PE=1 SV=2 - [DHB8_MOUSE]	25.1	2	5	5	18	259	26.5716	6.53662
Q8BWT5	Disco-interacting protein 2 homolog A OS=Mus musculus GN=Dip2a PE=1 SV=3 - [DIP2A_MOUSE]	0.92	3	1	1	2	1523	165.149	7.60596
Q8CBY8	Dynactin subunit 4 OS=Mus musculus GN=Dctn4 PE=1 SV=1 - [DCTN4_MOUSE]	17.34	1	5	5	29	467	53.0231	7.72314
Q8BVI4	Dihydropteridine reductase OS=Mus musculus GN=Qdpr PE=1 SV=2 - [DHPR_MOUSE]	42.32	6	11	11	52	241	25.5538	7.81104
Q6NS52	Diacylglycerol kinase beta OS=Mus musculus GN=Dgkb PE=1 SV=2 - [DGKB_MOUSE]	6.23	1	3	3	4	802	90.2132	7.92822
Q8K1M6	Dynamin-1-like protein OS=Mus musculus GN=Dnm1l PE=1 SV=2 - [DNM1L_MOUSE]	16.58	1	3	10	36	742	82.6065	7.04932
P51880	Fatty acid-binding protein, brain OS=Mus musculus GN=Fabp7 PE=1 SV=2 - [FABP7_MOUSE]	29.55	2	4	4	8	132	14.8834	5.63037
Q9DB41	Mitochondrial glutamate carrier 2 OS=Mus musculus GN=Slc25a18 PE=1 SV=4 - [GHC2_MOUSE]	20.94	1	3	5	21	320	34.1438	9.18799
O08842	GDNF family receptor alpha-2 OS=Mus musculus GN=Gfra2 PE=1 SV=2 - [GFRA2_MOUSE]	3.02	1	1	1	7	464	51.6929	7.75244
Q8K0U4	Heat shock 70 kDa protein 12A OS=Mus musculus GN=Hspa12a PE=1 SV=1 - [HS12A_MOUSE]	22.52	1	10	10	25	675	74.8245	6.771
Q7TNR6	Immunoglobulin superfamily member 21 OS=Mus musculus GN=Igsf21 PE=2 SV=1 - [IGS21_MOUSE]	3.42	1	1	1	1	468	51.9046	6.94678
O55023	Inositol monophosphatase 1 OS=Mus musculus GN=Impa1 PE=1 SV=1 - [IMPA1_MOUSE]	32.85	5	8	8	31	277	30.4162	5.18604
Q8CAQ8	MICOS complex subunit Mic60 OS=Mus musculus GN=Immt PE=1 SV=1 - [MIC60_MOUSE]	16.12	7	9	9	25	757	83.8482	6.60986
Q9CWE0	Mitochondrial fission regulator 1-like OS=Mus musculus GN=Mtfr1l PE=1 SV=1 - [MFR1L_MOUSE]	28.37	4	4	4	16	289	31.7062	6.1001
Q5F2E7	Nuclear fragile X mental retardation-interacting protein 2 OS=Mus musculus GN=Nufip2 PE=1 SV=1 - [NUFP2_MOUSE]	2.02	1	2	2	2	692	75.6107	8.70459
Q9CZ30	Obg-like ATPase 1 OS=Mus musculus GN=Ola1 PE=1 SV=1 - [OLA1_MOUSE]	14.39	2	4	4	6	396	44.7013	7.81104
Q922Q4	Pyrroline-5-carboxylate reductase 2 OS=Mus musculus GN=Pycr2 PE=1 SV=1 - [P5CR2_MOUSE]	26.25	5	6	6	13	320	33.6376	7.76709
Q9D8S4	Oligoribonuclease, mitochondrial OS=Mus musculus GN=Rexo2 PE=1 SV=2 - [ORN_MOUSE]	40.93	1	6	6	12	237	26.7216	7.15186
Q8BNW9	Kelch repeat and BTB domain-containing protein 11 OS=Mus musculus GN=Kbtbd11 PE=1 SV=3 - [KBTBB_MOUSE]	20.54	1	7	7	25	633	67.9036	5.38916
P05132	cAMP-dependent protein kinase catalytic subunit alpha OS=Mus musculus GN=Prkaca PE=1 SV=3 - [KAPCA_MOUSE]	6.55	1	1	2	2	351	40.545	8.79248
Q9Z2I0	LETM1 and EF-hand domain-containing protein 1, mitochondrial OS=Mus musculus GN=Letm1 PE=1 SV=1 - [LETM1_MOUSE]	10.03	1	4	4	9	738	82.9369	6.52197
Q7TNC4	Putative RNA-binding protein Luc7-like 2 OS=Mus musculus GN=Luc7l2 PE=1 SV=1 - [LC7L2_MOUSE]	9.18	3	2	2	3	392	46.5547	10.0962
Q61792	LIM and SH3 domain protein 1 OS=Mus musculus GN=Lasp1 PE=1 SV=1 - [LASP1_MOUSE]	33.46	10	9	9	28	263	29.9753	7.04932
P48678	Prelamin-A/C OS=Mus musculus GN=Lmna PE=1 SV=2 - [LMNA_MOUSE]	21.35	2	10	10	31	665	74.1927	6.97607
Q9D0E3	LysM and putative peptidoglycan-binding domain-containing protein 1 OS=Mus musculus GN=Lysmd1 PE=1 SV=1 - [LYSM1_MOUSE]	16.81	1	3	3	3	226	24.7987	8.92432
Q7TSJ2	Microtubule-associated protein 6 OS=Mus musculus GN=Map6 PE=1 SV=2 - [MAP6_MOUSE]	32.12	3	16	16	222	906	96.3906	9.49561
Q99KE1	NAD-dependent malic enzyme, mitochondrial OS=Mus musculus GN=Me2 PE=1 SV=1 - [MAOM_MOUSE]	14.09	1	3	3	10	589	65.7569	7.60596
P31938	Dual specificity mitogen-activated protein kinase kinase 1 OS=Mus musculus GN=Map2k1 PE=1 SV=2 - [MP2K1_MOUSE]	17.81	1	3	5	15	393	43.4464	6.69775
Q924M7	Mannose-6-phosphate isomerase OS=Mus musculus GN=Mpi PE=1 SV=1 - [MPI_MOUSE]	15.13	2	5	5	9	423	46.5447	5.94775
Q9CQ65	S-methyl-5'-thioadenosine phosphorylase OS=Mus musculus GN=Mtap PE=1 SV=1 - [MTAP_MOUSE]	33.57	1	8	8	11	283	31.0417	7.13721
P63239	Neuroendocrine convertase 1 OS=Mus musculus GN=Pcsk1 PE=1 SV=1 - [NEC1_MOUSE]	3.45	1	1	1	1	753	84.1214	6.43018
Q9CR61	NADH dehydrogenase [ubiquinone] 1 beta subcomplex subunit 7 OS=Mus musculus GN=Ndufb7 PE=1 SV=3 - [NDUB7_MOUSE]	32.12	1	3	3	12	137	16.3202	8.17725
Q91ZP9	N-terminal EF-hand calcium-binding protein 2 OS=Mus musculus GN=Necab2 PE=1 SV=1 - [NECA2_MOUSE]	22.37	2	8	8	20	389	43.4137	5.30029
P32020	Non-specific lipid-transfer protein OS=Mus musculus GN=Scp2 PE=1 SV=3 - [NLTP_MOUSE]	10.79	1	5	5	10	547	59.0878	7.44482
P28656	Nucleosome assembly protein 1-like 1 OS=Mus musculus GN=Nap1l1 PE=1 SV=2 - [NP1L1_MOUSE]	22.25	2	4	5	17	391	45.3169	4.4624
Q78ZA7	Nucleosome assembly protein 1-like 4 OS=Mus musculus GN=Nap1l4 PE=1 SV=1 - [NP1L4_MOUSE]	13.07	3	3	4	9	375	42.6529	4.66553
P57774	Pro-neuropeptide Y OS=Mus musculus GN=Npy PE=1 SV=2 - [NPY_MOUSE]	8.25	1	1	1	1	97	10.8665	7.12256
Q9D6T0	Nitric oxide synthase-interacting protein OS=Mus musculus GN=Nosip PE=1 SV=1 - [NOSIP_MOUSE]	3.99	1	1	1	1	301	33.188	8.6167
Q80XU3	Nuclear ubiquitous casein and cyclin-dependent kinase substrate 1 OS=Mus musculus GN=Nucks1 PE=1 SV=1 - [NUCKS_MOUSE]	17.52	2	4	4	13	234	26.2976	5.13525
P47857	ATP-dependent 6-phosphofructokinase, muscle type OS=Mus musculus GN=Pfkm PE=1 SV=3 - [PFKAM_MOUSE]	19.36	1	9	10	41	780	85.2146	8.00146
O70591	Prefoldin subunit 2 OS=Mus musculus GN=Pfdn2 PE=1 SV=2 - [PFD2_MOUSE]	24.68	2	4	4	14	154	16.5236	6.58057
Q9DBG5	Perilipin-3 OS=Mus musculus GN=Plin3 PE=1 SV=1 - [PLIN3_MOUSE]	18.31	1	4	4	10	437	47.233	5.61768
Q62048	Astrocytic phosphoprotein PEA-15 OS=Mus musculus GN=Pea15 PE=1 SV=1 - [PEA15_MOUSE]	12.31	1	2	2	3	130	15.0448	5.021
P61759	Prefoldin subunit 3 OS=Mus musculus GN=Vbp1 PE=1 SV=2 - [PFD3_MOUSE]	26.02	2	4	4	15	196	22.4214	6.27783
Q8BVQ5	Protein phosphatase methylesterase 1 OS=Mus musculus GN=Ppme1 PE=1 SV=5 - [PPME1_MOUSE]	19.69	2	6	6	17	386	42.2292	5.97314
O35551	Rab GTPase-binding effector protein 1 OS=Mus musculus GN=Rabep1 PE=1 SV=2 - [RABE1_MOUSE]	13.23	3	8	8	15	862	99.4624	5.0083
Q62419	Endophilin-A2 OS=Mus musculus GN=Sh3gl1 PE=1 SV=1 - [SH3G1_MOUSE]	22.83	1	6	7	30	368	41.4922	5.71924
Q9CU62	Structural maintenance of chromosomes protein 1A OS=Mus musculus GN=Smc1a PE=1 SV=4 - [SMC1A_MOUSE]	4.22	1	3	3	3	1233	143.146	7.63525
Q921E2	Ras-related protein Rab-31 OS=Mus musculus GN=Rab31 PE=1 SV=1 - [RAB31_MOUSE]	18.04	2	2	2	3	194	21.3178	7.40088
Q8C2Q3	RNA-binding protein 14 OS=Mus musculus GN=Rbm14 PE=1 SV=1 - [RBM14_MOUSE]	9.27	4	6	7	13	669	69.406	9.67139
Q8BIF2	RNA binding protein fox-1 homolog 3 OS=Mus musculus GN=Rbfox3 PE=1 SV=2 - [RFOX3_MOUSE]	4.81	1	1	1	8	374	40.585	7.89893
P12970	60S ribosomal protein L7a OS=Mus musculus GN=Rpl7a PE=1 SV=2 - [RL7A_MOUSE]	16.54	5	4	4	7	266	29.958	10.5649
Q6ZWV7	60S ribosomal protein L35 OS=Mus musculus GN=Rpl35 PE=1 SV=1 - [RL35_MOUSE]	11.38	1	1	1	1	123	14.5436	11.0483
Q9D1N9	39S ribosomal protein L21, mitochondrial OS=Mus musculus GN=Mrpl21 PE=1 SV=1 - [RM21_MOUSE]	9.09	1	2	2	3	209	23.3517	9.99365
P62983	Ubiquitin-40S ribosomal protein S27a OS=Mus musculus GN=Rps27a PE=1 SV=2 - [RS27A_MOUSE]	30.77	11	3	3	7	156	17.9395	9.64209
P97351	40S ribosomal protein S3a OS=Mus musculus GN=Rps3a PE=1 SV=3 - [RS3A_MOUSE]	35.23	1	8	8	27	264	29.8657	9.72998
Q9Z306	Solute carrier family 22 member 4 OS=Mus musculus GN=Slc22a4 PE=1 SV=1 - [S22A4_MOUSE]	1.81	1	1	1	1	553	62.2495	6.40479
Q61753	D-3-phosphoglycerate dehydrogenase OS=Mus musculus GN=Phgdh PE=1 SV=3 - [SERA_MOUSE]	40.9	2	19	19	71	533	56.5491	6.53662
Q9JK48	Endophilin-B1 OS=Mus musculus GN=Sh3glb1 PE=1 SV=1 - [SHLB1_MOUSE]	16.44	4	5	5	9	365	40.8298	6.03662
Q8BTI8	Serine/arginine repetitive matrix protein 2 OS=Mus musculus GN=Srrm2 PE=1 SV=3 - [SRRM2_MOUSE]	4.88	3	7	7	17	2703	294.666	12.0298
Q8R086	Sulfite oxidase, mitochondrial OS=Mus musculus GN=Suox PE=1 SV=2 - [SUOX_MOUSE]	12.27	1	3	3	9	546	60.7178	6.53662
Q3TWW8	Serine/arginine-rich splicing factor 6 OS=Mus musculus GN=Srsf6 PE=1 SV=1 - [SRSF6_MOUSE]	8.55	3	2	3	7	339	39.0021	11.4585
Q9D0R2	Threonine--tRNA ligase, cytoplasmic OS=Mus musculus GN=Tars PE=1 SV=2 - [SYTC_MOUSE]	2.08	1	1	1	1	722	83.3029	7.35693
P58871	182 kDa tankyrase-1-binding protein OS=Mus musculus GN=Tnks1bp1 PE=1 SV=2 - [TB182_MOUSE]	9.59	2	10	10	16	1720	181.714	4.88135
P80317	T-complex protein 1 subunit zeta OS=Mus musculus GN=Cct6a PE=1 SV=3 - [TCPZ_MOUSE]	33.33	3	12	12	29	531	57.9677	7.07861
Q921P9	Transcription elongation factor A protein-like 1 OS=Mus musculus GN=Tceal1 PE=2 SV=1 - [TCAL1_MOUSE]	7.27	1	1	1	1	165	19.3002	4.53857
Q5SSZ5	Tensin-3 OS=Mus musculus GN=Tns3 PE=1 SV=1 - [TENS3_MOUSE]	2.01	1	1	1	1	1440	155.491	6.65381
Q9WV98	Mitochondrial import inner membrane translocase subunit Tim9 OS=Mus musculus GN=Timm9 PE=1 SV=1 - [TIM9_MOUSE]	25.84	1	3	3	14	89	10.3372	7.21045
Q9D328	Transmembrane protein 35A OS=Mus musculus GN=Tmem35a PE=1 SV=1 - [TM35A_MOUSE]	11.98	1	1	1	1	167	18.4933	9.99365
Q8C996	Transmembrane protein 163 OS=Mus musculus GN=Tmem163 PE=1 SV=1 - [TM163_MOUSE]	7.64	1	2	2	4	288	31.1734	7.92822
A2AN08	E3 ubiquitin-protein ligase UBR4 OS=Mus musculus GN=Ubr4 PE=1 SV=1 - [UBR4_MOUSE]	0.33	1	1	1	2	5180	571.927	6.06201
P52760	Ribonuclease UK114 OS=Mus musculus GN=Hrsp12 PE=1 SV=3 - [UK114_MOUSE]	95.56	1	11	11	44	135	14.2465	8.67529
Q91ZJ5	UTP--glucose-1-phosphate uridylyltransferase OS=Mus musculus GN=Ugp2 PE=1 SV=3 - [UGPA_MOUSE]	23.03	1	8	8	25	508	56.9437	7.60596
Q9D1C8	Vacuolar protein sorting-associated protein 28 homolog OS=Mus musculus GN=Vps28 PE=1 SV=1 - [VPS28_MOUSE]	14.93	1	2	2	2	221	25.4357	5.5415
Q8R5H6	Wiskott-Aldrich syndrome protein family member 1 OS=Mus musculus GN=Wasf1 PE=1 SV=2 - [WASF1_MOUSE]	10.91	1	5	5	9	559	61.4708	6.3667
D3YUW2	Protein A830010M20Rik (Fragment) OS=Mus musculus GN=A830010M20Rik PE=1 SV=1 - [D3YUW2_MOUSE]	2.72	5	1	1	3	405	42.9961	10.2573
A0A0A6YW06	Protein enabled homolog OS=Mus musculus GN=Enah PE=1 SV=1 - [A0A0A6YW06_MOUSE]	7.77	7	3	3	5	785	83.9327	7.53271
A0A0R4J0Q2	Type I inositol 3,4-bisphosphate 4-phosphatase OS=Mus musculus GN=Inpp4a PE=1 SV=1 - [A0A0R4J0Q2_MOUSE]	4.86	11	3	3	3	679	76.461	7.28369
F6RIN9	Protein scribble homolog (Fragment) OS=Mus musculus GN=Scrib PE=1 SV=1 - [F6RIN9_MOUSE]	2.33	2	1	1	1	945	99.5833	6.48096
V9GXD9	Synergin gamma OS=Mus musculus GN=Synrg PE=1 SV=1 - [V9GXD9_MOUSE]	2.63	3	1	1	1	1216	129.913	5.021
D3Z0K7	WAS/WASL-interacting protein family member 2 (Fragment) OS=Mus musculus GN=Wipf2 PE=1 SV=1 - [D3Z0K7_MOUSE]	13.66	2	1	1	1	183	18.7677	10.4185
D3Z4S6	Transmembrane protein 132A OS=Mus musculus GN=Tmem132a PE=1 SV=1 - [D3Z4S6_MOUSE]	3.78	2	1	1	2	687	74.7258	6.63916
D3YZ62	Unconventional myosin-Va OS=Mus musculus GN=Myo5a PE=1 SV=1 - [D3YZ62_MOUSE]	3.01	6	4	4	6	1828	212.201	8.6167
A0A140T8T3	Protein Rps18-ps3 OS=Mus musculus GN=Rps18-ps3 PE=3 SV=1 - [A0A140T8T3_MOUSE]	13.99	1	2	2	2	143	16.7233	10.9604
D3Z0V7	TSC22 domain family protein 1 OS=Mus musculus GN=Tsc22d1 PE=1 SV=1 - [D3Z0V7_MOUSE]	9.65	5	4	4	6	995	102.024	5.77002
A0A0G2JGQ6	Serine/threonine-protein kinase DCLK1 OS=Mus musculus GN=Dclk1 PE=1 SV=1 - [A0A0G2JGQ6_MOUSE]	16.1	12	4	8	19	739	82.0539	8.66064
A0A1B0GT76	Amyloid beta A4 precursor protein-binding family B member 1 (Fragment) OS=Mus musculus GN=Apbb1 PE=1 SV=1 - [A0A1B0GT76_MOUSE]	7.83	8	1	1	1	230	25.2108	8.48486
D3YV69	Ras-related protein Rab-6A OS=Mus musculus GN=Rab6a PE=1 SV=1 - [D3YV69_MOUSE]	25.71	2	2	3	7	175	19.949	5.07178
A2AS33	O-acetyl-ADP-ribose deacetylase MACROD2 OS=Mus musculus GN=Macrod2 PE=1 SV=1 - [A2AS33_MOUSE]	2.6	2	1	1	3	423	46.4522	4.66553
F8WHZ9	Alpha-adducin OS=Mus musculus GN=Add1 PE=1 SV=1 - [F8WHZ9_MOUSE]	28.4	6	2	13	39	662	73.1178	6.58057
E9Q175	Unconventional myosin-VI OS=Mus musculus GN=Myo6 PE=1 SV=1 - [E9Q175_MOUSE]	5.11	7	3	3	9	1253	144.682	8.51416
E9Q1K3	Alpha-adducin OS=Mus musculus GN=Add1 PE=1 SV=1 - [E9Q1K3_MOUSE]	31.52	4	2	13	38	660	72.8806	6.31592
A0A0R4J1H6	Golgin subfamily A member 3 OS=Mus musculus GN=Golga3 PE=1 SV=1 - [A0A0R4J1H6_MOUSE]	1.66	3	2	2	4	1447	162.792	5.37646
E9PUI3	Tripartite motif-containing protein 46 OS=Mus musculus GN=Trim46 PE=1 SV=1 - [E9PUI3_MOUSE]	11.86	4	2	2	2	447	49.689	8.32373
D3Z5P0	Serine/threonine-protein kinase BRSK1 OS=Mus musculus GN=Brsk1 PE=1 SV=1 - [D3Z5P0_MOUSE]	15.93	2	5	5	11	703	77.1486	9.17334
E9PWY9	Phenylalanine--tRNA ligase alpha subunit OS=Mus musculus GN=Farsa PE=1 SV=1 - [E9PWY9_MOUSE]	8.09	3	3	3	3	507	57.4347	8.01611
A0A0M3HEP7	Phospholipid-transporting ATPase OS=Mus musculus GN=Atp8a1 PE=1 SV=1 - [A0A0M3HEP7_MOUSE]	4.47	4	3	3	4	1164	131.425	6.88818
Q3TYE5	Limbic system-associated membrane protein OS=Mus musculus GN=Lsamp PE=1 SV=1 - [Q3TYE5_MOUSE]	24.26	4	5	5	9	338	37.2871	6.68311
G3XA10	Heterogeneous nuclear ribonucleoprotein U OS=Mus musculus GN=Gm28062 PE=1 SV=1 - [G3XA10_MOUSE]	18.41	2	12	12	35	793	86.7513	5.92236
Q8BZN7	Thyroid hormone receptor-associated protein 3 OS=Mus musculus GN=Thrap3 PE=1 SV=1 - [Q8BZN7_MOUSE]	4.51	3	2	2	8	709	80.063	10.3159
B1AZ46	Brain-specific angiogenesis inhibitor 1-associated protein 2 OS=Mus musculus GN=Baiap2 PE=1 SV=1 - [B1AZ46_MOUSE]	28.41	2	7	7	31	521	57.6461	8.79248
Q8R2K3	Single-stranded DNA-binding protein OS=Mus musculus GN=Ssbp1 PE=1 SV=1 - [Q8R2K3_MOUSE]	60.81	3	6	6	6	148	17.1459	9.78857
Q68FL0	Slc8a1 protein OS=Mus musculus GN=Slc8a1 PE=1 SV=1 - [Q68FL0_MOUSE]	6.37	4	3	3	9	958	106.595	4.99561
Q3UU93	Receptor-type tyrosine-protein phosphatase N2 OS=Mus musculus GN=Ptprn2 PE=1 SV=1 - [Q3UU93_MOUSE]	7.17	2	6	6	8	934	104.134	5.99854
Q80VB6	Dclk1 protein OS=Mus musculus GN=Dclk1 PE=1 SV=1 - [Q80VB6_MOUSE]	20.66	6	1	5	10	363	40.3558	9.67139
Q9D8I4	Thioredoxin reductase 2, mitochondrial OS=Mus musculus GN=Txnrd2 PE=1 SV=1 - [Q9D8I4_MOUSE]	29.7	11	2	3	8	101	10.7984	9.0415
Q6ZWZ4	60S ribosomal protein L36 OS=Mus musculus GN=Rpl36 PE=1 SV=1 - [Q6ZWZ4_MOUSE]	25.71	3	3	3	4	105	12.2459	11.5903
Q6PF96	Electron transfer flavoprotein-ubiquinone oxidoreductase, mitochondrial OS=Mus musculus GN=Etfdh PE=1 SV=1 - [Q6PF96_MOUSE]	11.69	2	5	5	8	556	61.122	6.82959
A2A4A6	Phosphoinositide phospholipase C OS=Mus musculus GN=Plcg1 PE=1 SV=1 - [A2A4A6_MOUSE]	1.09	2	1	1	1	1290	148.44	5.98584
A2AFI8	RalBP1-associated Eps domain-containing protein 2 OS=Mus musculus GN=Reps2 PE=1 SV=1 - [A2AFI8_MOUSE]	14.22	4	5	5	5	647	70.4404	7.25439
A0A0G2JDL9	MCG10748, isoform CRA_b OS=Mus musculus GN=Rap1a PE=1 SV=1 - [A0A0G2JDL9_MOUSE]	32.2	4	2	4	9	118	13.4171	9.21729
Q3TFT3	Coiled-coil-helix-coiled-coil-helix domain-containing protein 7 OS=Mus musculus GN=Chchd7 PE=1 SV=1 - [Q3TFT3_MOUSE]	34.62	5	1	1	3	52	6.36593	8.19189
J3QMX0	Ribonuclease P 14 subunit (Human) OS=Mus musculus GN=Rpp14 PE=1 SV=1 - [J3QMX0_MOUSE]	17.72	1	1	1	1	158	17.3741	8.96826
Q561M1	Acp1 protein OS=Mus musculus GN=Acp1 PE=1 SV=1 - [Q561M1_MOUSE]	50.63	2	6	6	17	158	17.9108	6.53662
Q52KF7	Disks large homolog 3 OS=Mus musculus GN=Dlg3 PE=1 SV=1 - [Q52KF7_MOUSE]	10.28	4	5	6	9	817	90.2716	7.03467
B2RW11	Ankyrin repeat domain 34A OS=Mus musculus GN=Ankrd34a PE=1 SV=1 - [B2RW11_MOUSE]	11.72	1	3	3	11	495	52.4182	9.45166
F6V9T4	SLAIN motif-containing protein 1 (Fragment) OS=Mus musculus GN=Slain1 PE=1 SV=1 - [F6V9T4_MOUSE]	8.88	4	1	1	1	214	24.0955	5.47803
S4R2K9	Ankyrin-3 (Fragment) OS=Mus musculus GN=Ank3 PE=1 SV=1 - [S4R2K9_MOUSE]	9.38	20	14	16	39	2622	284.467	7.94287
D3YUZ8	Disks large homolog 2 OS=Mus musculus GN=Dlg2 PE=1 SV=1 - [D3YUZ8_MOUSE]	15.89	4	8	9	19	755	83.8987	5.93506
F6XUR8	Serine protease HTRA2, mitochondrial (Fragment) OS=Mus musculus GN=Htra2 PE=1 SV=1 - [F6XUR8_MOUSE]	20.88	7	3	3	10	249	26.7501	7.06396
G3V005	Coronin-2B (Fragment) OS=Mus musculus GN=Coro2b PE=1 SV=1 - [G3V005_MOUSE]	12.4	3	1	1	1	121	13.6148	8.51416
S4R1F2	Annexin OS=Mus musculus GN=Anxa4 PE=1 SV=1 - [S4R1F2_MOUSE]	7.65	6	1	1	1	196	21.854	4.98291
F6UKG4	1-phosphatidylinositol 4,5-bisphosphate phosphodiesterase eta-2 (Fragment) OS=Mus musculus GN=Plch2 PE=1 SV=1 - [F6UKG4_MOUSE]	23.42	6	2	2	2	111	12.5902	7.09326
A0A0A6YWA8	Translocon-associated protein subunit beta (Fragment) OS=Mus musculus GN=Ssr2 PE=1 SV=1 - [A0A0A6YWA8_MOUSE]	9.4	4	1	1	1	117	12.7266	4.93213
D3YUT3	40S ribosomal protein S19 (Fragment) OS=Mus musculus GN=Rps19 PE=1 SV=2 - [D3YUT3_MOUSE]	32.33	6	6	6	11	133	14.8869	10.3452
E9Q0X0	Proteasome subunit alpha type (Fragment) OS=Mus musculus GN=Psma4 PE=1 SV=1 - [E9Q0X0_MOUSE]	9.35	3	1	1	1	139	15.69	5.93506
E9Q6U4	Prefoldin subunit 4 OS=Mus musculus GN=Pfdn4 PE=1 SV=1 - [E9Q6U4_MOUSE]	30	5	3	3	7	130	14.7223	4.50049
G3UXK7	Cytochrome c-type heme lyase OS=Mus musculus GN=Hccs PE=1 SV=1 - [G3UXK7_MOUSE]	13.98	2	1	1	2	93	9.54651	6.26514
E9PZI9	OX-2 membrane glycoprotein OS=Mus musculus GN=Cd200 PE=1 SV=1 - [E9PZI9_MOUSE]	21.71	5	2	2	3	129	14.2982	7.81104
F8WHV1	Mitotic spindle-associated MMXD complex subunit MIP18 OS=Mus musculus GN=Fam96b PE=1 SV=1 - [F8WHV1_MOUSE]	16.18	2	1	1	2	136	14.9943	5.45264
E9Q9P1	Leucine zipper transcription factor-like protein 1 OS=Mus musculus GN=Lztfl1 PE=1 SV=1 - [E9Q9P1_MOUSE]	9.7	2	1	1	1	134	15.509	4.95752
E9Q6W2	Cytochrome c oxidase assembly factor 3 homolog, mitochondrial OS=Mus musculus GN=Coa3 PE=1 SV=1 - [E9Q6W2_MOUSE]	10	2	1	1	1	90	9.81627	11.4438
A2A5E1	DnaJ homolog subfamily C member 7 (Fragment) OS=Mus musculus GN=Dnajc7 PE=1 SV=1 - [A2A5E1_MOUSE]	10.2	3	1	1	3	147	17.1663	8.85107
E0CZ27	Histone H3 (Fragment) OS=Mus musculus GN=H3f3a PE=3 SV=1 - [E0CZ27_MOUSE]	32.77	5	1	2	5	119	13.3144	11.019
A0A140T8K8	60S ribosomal protein L13 OS=Mus musculus GN=Rpl13-ps3 PE=3 SV=1 - [A0A140T8K8_MOUSE]	27.05	2	6	6	17	207	23.9933	11.4878
G3UX67	26S proteasome non-ATPase regulatory subunit 11 (Fragment) OS=Mus musculus GN=Psmd11 PE=1 SV=1 - [G3UX67_MOUSE]	38.81	7	1	1	1	67	7.59205	7.25439
D3YVM8	Biogenesis of lysosome-related organelles complex 1 subunit 1 OS=Mus musculus GN=Bloc1s1 PE=1 SV=1 - [D3YVM8_MOUSE]	5.79	2	1	1	1	121	13.8911	6.78564
P60843	Eukaryotic initiation factor 4A-I OS=Mus musculus GN=Eif4a1 PE=1 SV=1 - [IF4A1_MOUSE]	18.97	6	4	5	18	406	46.1246	5.47803
P62204	Calmodulin OS=Mus musculus GN=Calm1 PE=1 SV=2 - [CALM_MOUSE]	77.18	4	8	8	388	149	16.8268	4.22119
P62311	U6 snRNA-associated Sm-like protein LSm3 OS=Mus musculus GN=Lsm3 PE=1 SV=2 - [LSM3_MOUSE]	21.57	1	3	3	9	102	11.838	4.70361
Q9Z2U1	Proteasome subunit alpha type-5 OS=Mus musculus GN=Psma5 PE=1 SV=1 - [PSA5_MOUSE]	39.42	2	9	9	17	241	26.3942	4.79248
P62196	26S protease regulatory subunit 8 OS=Mus musculus GN=Psmc5 PE=1 SV=1 - [PRS8_MOUSE]	28.08	2	7	8	19	406	45.5971	7.54736
Q63810	Calcineurin subunit B type 1 OS=Mus musculus GN=Ppp3r1 PE=1 SV=3 - [CANB1_MOUSE]	40.59	1	4	4	61	170	19.2876	4.80518
P62627	Dynein light chain roadblock-type 1 OS=Mus musculus GN=Dynlrb1 PE=1 SV=3 - [DLRB1_MOUSE]	78.13	2	4	4	45	96	10.9828	7.25439
P62267	40S ribosomal protein S23 OS=Mus musculus GN=Rps23 PE=1 SV=3 - [RS23_MOUSE]	27.27	1	2	2	3	143	15.7977	10.4917
P62331	ADP-ribosylation factor 6 OS=Mus musculus GN=Arf6 PE=1 SV=2 - [ARF6_MOUSE]	17.14	1	1	1	1	175	20.0694	8.95361
P22599	Alpha-1-antitrypsin 1-2 OS=Mus musculus GN=Serpina1b PE=1 SV=2 - [A1AT2_MOUSE]	9.93	1	1	3	21	413	45.9455	5.5415
Q9CQ60	6-phosphogluconolactonase OS=Mus musculus GN=Pgls PE=1 SV=1 - [6PGL_MOUSE]	37.35	4	9	9	53	257	27.2374	5.84619
Q07417	Short-chain specific acyl-CoA dehydrogenase, mitochondrial OS=Mus musculus GN=Acads PE=1 SV=2 - [ACADS_MOUSE]	5.58	1	2	2	2	412	44.8611	8.47021
D3YVF0	A-kinase anchor protein 5 OS=Mus musculus GN=Akap5 PE=1 SV=2 - [AKAP5_MOUSE]	11.95	2	5	5	15	745	79.3495	4.75439
O55137	Acyl-coenzyme A thioesterase 1 OS=Mus musculus GN=Acot1 PE=1 SV=1 - [ACOT1_MOUSE]	5.49	7	2	2	11	419	46.1067	6.58057
P56213	FAD-linked sulfhydryl oxidase ALR OS=Mus musculus GN=Gfer PE=1 SV=2 - [ALR_MOUSE]	19.7	1	4	4	7	198	22.862	7.92822
O54774	AP-3 complex subunit delta-1 OS=Mus musculus GN=Ap3d1 PE=1 SV=1 - [AP3D1_MOUSE]	6.09	1	5	5	7	1199	134.996	7.37158
Q00623	Apolipoprotein A-I OS=Mus musculus GN=Apoa1 PE=1 SV=2 - [APOA1_MOUSE]	26.52	1	7	7	19	264	30.5966	5.73193
Q9D0A3	Arpin OS=Mus musculus GN=Arpin PE=1 SV=1 - [ARPIN_MOUSE]	7.52	1	1	1	1	226	25.1775	5.18604
Q8VBT9	Tether containing UBX domain for GLUT4 OS=Mus musculus GN=Aspscr1 PE=1 SV=1 - [ASPC1_MOUSE]	22.91	10	7	7	16	550	59.7588	6.96143
Q06185	ATP synthase subunit e, mitochondrial OS=Mus musculus GN=Atp5i PE=1 SV=2 - [ATP5I_MOUSE]	59.15	2	6	6	32	71	8.23047	9.34912
Q80TZ3	Putative tyrosine-protein phosphatase auxilin OS=Mus musculus GN=Dnajc6 PE=1 SV=2 - [AUXI_MOUSE]	4.37	4	1	2	2	938	102.235	7.2251
Q9CQQ7	ATP synthase F(0) complex subunit B1, mitochondrial OS=Mus musculus GN=Atp5f1 PE=1 SV=1 - [AT5F1_MOUSE]	20.31	2	5	5	7	256	28.9304	9.05615
Q923D2	Flavin reductase (NADPH) OS=Mus musculus GN=Blvrb PE=1 SV=3 - [BLVRB_MOUSE]	38.35	4	4	4	7	206	22.1834	7.00537
Q6PHS9	Voltage-dependent calcium channel subunit alpha-2/delta-2 OS=Mus musculus GN=Cacna2d2 PE=1 SV=1 - [CA2D2_MOUSE]	3.73	2	3	3	3	1154	130.303	5.65576
Q02105	Complement C1q subcomponent subunit C OS=Mus musculus GN=C1qc PE=1 SV=2 - [C1QC_MOUSE]	5.28	1	1	1	2	246	25.9749	8.54346
O08539	Myc box-dependent-interacting protein 1 OS=Mus musculus GN=Bin1 PE=1 SV=1 - [BIN1_MOUSE]	28.4	3	16	18	49	588	64.4302	5.03369
P12658	Calbindin OS=Mus musculus GN=Calb1 PE=1 SV=2 - [CALB1_MOUSE]	14.94	1	3	4	5	261	29.9751	4.83057
Q99N28	Cell adhesion molecule 3 OS=Mus musculus GN=Cadm3 PE=1 SV=1 - [CADM3_MOUSE]	19.44	2	3	3	5	396	42.9375	5.79541
Q8C1B1	Calmodulin-regulated spectrin-associated protein 2 OS=Mus musculus GN=Camsap2 PE=1 SV=3 - [CAMP2_MOUSE]	1.64	4	2	2	2	1461	164.23	6.85889
Q00493	Carboxypeptidase E OS=Mus musculus GN=Cpe PE=1 SV=2 - [CBPE_MOUSE]	9.87	1	3	3	12	476	53.2223	5.18604
Q8VCN6	CD99 antigen OS=Mus musculus GN=Cd99 PE=1 SV=1 - [CD99_MOUSE]	6.29	1	1	1	3	175	16.7723	5.32568
Q6IRU7	Centrosomal protein of 78 kDa OS=Mus musculus GN=Cep78 PE=2 SV=1 - [CEP78_MOUSE]	9.24	1	2	2	2	790	86.8359	8.54346
P47753	F-actin-capping protein subunit alpha-1 OS=Mus musculus GN=Capza1 PE=1 SV=4 - [CAZA1_MOUSE]	19.93	3	2	4	13	286	32.9193	5.5542
P23927	Alpha-crystallin B chain OS=Mus musculus GN=Cryab PE=1 SV=2 - [CRYAB_MOUSE]	49.71	1	5	5	7	175	20.0564	7.32764
Q9JLB4	Cubilin OS=Mus musculus GN=Cubn PE=1 SV=3 - [CUBN_MOUSE]	0.22	1	1	1	1	3623	398.841	5.75732
Q7TMB8	Cytoplasmic FMR1-interacting protein 1 OS=Mus musculus GN=Cyfip1 PE=1 SV=1 - [CYFP1_MOUSE]	3.83	3	1	5	5	1253	145.148	6.90283
Q5SQX6	Cytoplasmic FMR1-interacting protein 2 OS=Mus musculus GN=Cyfip2 PE=1 SV=2 - [CYFP2_MOUSE]	4.79	2	2	6	7	1253	145.565	7.04932
P56564	Excitatory amino acid transporter 1 OS=Mus musculus GN=Slc1a3 PE=1 SV=2 - [EAA1_MOUSE]	9.94	2	4	4	7	543	59.5837	8.39697
Q9D7X3	Dual specificity protein phosphatase 3 OS=Mus musculus GN=Dusp3 PE=1 SV=1 - [DUS3_MOUSE]	42.16	5	6	6	23	185	20.4592	6.53662
Q9D7S9	Charged multivesicular body protein 5 OS=Mus musculus GN=Chmp5 PE=1 SV=1 - [CHMP5_MOUSE]	42.01	1	4	4	7	219	24.5603	4.79248
Q9DAU1	Protein canopy homolog 3 OS=Mus musculus GN=Cnpy3 PE=1 SV=1 - [CNPY3_MOUSE]	15.22	1	2	2	5	276	30.5186	5.61768
Q921W0	Charged multivesicular body protein 1a OS=Mus musculus GN=Chmp1a PE=1 SV=1 - [CHM1A_MOUSE]	23.47	1	3	3	3	196	21.5942	8.06006
Q9CQI6	Coactosin-like protein OS=Mus musculus GN=Cotl1 PE=1 SV=3 - [COTL1_MOUSE]	41.55	1	5	5	8	142	15.934	5.40186
Q8C9B9	Death-inducer obliterator 1 OS=Mus musculus GN=Dido1 PE=1 SV=4 - [DIDO1_MOUSE]	1.64	1	1	1	1	2256	247.024	7.91357
Q9R0P5	Destrin OS=Mus musculus GN=Dstn PE=1 SV=3 - [DEST_MOUSE]	42.42	1	7	9	29	165	18.5095	7.97217
Q91VR5	ATP-dependent RNA helicase DDX1 OS=Mus musculus GN=Ddx1 PE=1 SV=1 - [DDX1_MOUSE]	12.03	1	5	5	8	740	82.4478	7.21045
Q9D8N0	Elongation factor 1-gamma OS=Mus musculus GN=Eef1g PE=1 SV=3 - [EF1G_MOUSE]	11.21	1	5	5	8	437	50.0292	6.7417
Q8K3H0	DCC-interacting protein 13-alpha OS=Mus musculus GN=Appl1 PE=1 SV=1 - [DP13A_MOUSE]	8.77	1	3	3	3	707	79.2784	5.41455
Q8BH95	Enoyl-CoA hydratase, mitochondrial OS=Mus musculus GN=Echs1 PE=1 SV=1 - [ECHM_MOUSE]	44.48	1	12	12	29	290	31.4542	8.48486
Q60900	ELAV-like protein 3 OS=Mus musculus GN=Elavl3 PE=1 SV=1 - [ELAV3_MOUSE]	6.81	4	1	2	2	367	39.5083	9.27588
Q6PH08	ERC protein 2 OS=Mus musculus GN=Erc2 PE=1 SV=2 - [ERC2_MOUSE]	8.99	2	5	7	16	957	110.571	7.03467
Q9D1Q6	Endoplasmic reticulum resident protein 44 OS=Mus musculus GN=Erp44 PE=1 SV=1 - [ERP44_MOUSE]	13.05	3	5	5	6	406	46.8233	5.2749
Q8BHZ0	Protein FAM49A OS=Mus musculus GN=Fam49a PE=1 SV=1 - [FA49A_MOUSE]	23.22	1	3	5	21	323	37.3187	6.01123
Q9D6M3	Mitochondrial glutamate carrier 1 OS=Mus musculus GN=Slc25a22 PE=1 SV=1 - [GHC1_MOUSE]	30.65	11	6	8	31	323	34.6482	9.08545
Q9D0S9	Histidine triad nucleotide-binding protein 2, mitochondrial OS=Mus musculus GN=Hint2 PE=1 SV=1 - [HINT2_MOUSE]	42.33	1	6	6	19	163	17.3094	9.81787
Q7TMY8	E3 ubiquitin-protein ligase HUWE1 OS=Mus musculus GN=Huwe1 PE=1 SV=5 - [HUWE1_MOUSE]	2.67	2	6	6	8	4377	482.332	5.22412
Q8BGD9	Eukaryotic translation initiation factor 4B OS=Mus musculus GN=Eif4b PE=1 SV=1 - [IF4B_MOUSE]	2.62	1	1	1	2	611	68.7992	5.66846
O55135	Eukaryotic translation initiation factor 6 OS=Mus musculus GN=Eif6 PE=1 SV=2 - [IF6_MOUSE]	15.51	4	2	2	5	245	26.4942	4.7417
P70168	Importin subunit beta-1 OS=Mus musculus GN=Kpnb1 PE=1 SV=2 - [IMB1_MOUSE]	4.91	1	3	3	15	876	97.1221	4.77979
P85094	Isochorismatase domain-containing protein 2A OS=Mus musculus GN=Isoc2a PE=1 SV=1 - [ISC2A_MOUSE]	34.95	1	4	4	17	206	22.403	8.01611
Q8VIM9	Immunity-related GTPase family Q protein OS=Mus musculus GN=Irgq PE=1 SV=1 - [IRGQ_MOUSE]	4.8	1	2	2	2	583	59.2868	4.83057
P63085	Mitogen-activated protein kinase 1 OS=Mus musculus GN=Mapk1 PE=1 SV=3 - [MK01_MOUSE]	27.65	16	4	7	14	358	41.2492	6.97607
Q59J78	Mimitin, mitochondrial OS=Mus musculus GN=Ndufaf2 PE=1 SV=1 - [MIMIT_MOUSE]	8.33	1	1	1	1	168	19.6158	8.25049
P29758	Ornithine aminotransferase, mitochondrial OS=Mus musculus GN=Oat PE=1 SV=1 - [OAT_MOUSE]	48.06	1	13	13	22	439	48.3239	6.62451
O08600	Endonuclease G, mitochondrial OS=Mus musculus GN=Endog PE=1 SV=1 - [NUCG_MOUSE]	26.19	1	5	5	7	294	32.1708	9.53955
Q9JM14	5'(3')-deoxyribonucleotidase, cytosolic type OS=Mus musculus GN=Nt5c PE=1 SV=1 - [NT5C_MOUSE]	41.5	2	8	8	32	200	23.0618	5.49072
Q9WUR9	Adenylate kinase 4, mitochondrial OS=Mus musculus GN=Ak4 PE=1 SV=1 - [KAD4_MOUSE]	36.32	3	5	5	22	223	25.0461	7.53271
Q62120	Tyrosine-protein kinase JAK2 OS=Mus musculus GN=Jak2 PE=1 SV=2 - [JAK2_MOUSE]	2.21	2	1	1	1	1129	130.152	7.51807
P63318	Protein kinase C gamma type OS=Mus musculus GN=Prkcg PE=1 SV=1 - [KPCG_MOUSE]	16.93	4	7	8	16	697	78.3071	7.45947
Q8BFW7	Lipoma-preferred partner homolog OS=Mus musculus GN=Lpp PE=1 SV=1 - [LPP_MOUSE]	6.85	1	2	2	3	613	65.8479	7.37158
Q9CPU0	Lactoylglutathione lyase OS=Mus musculus GN=Glo1 PE=1 SV=3 - [LGUL_MOUSE]	26.63	1	5	5	9	184	20.7964	5.46533
Q9CQQ8	U6 snRNA-associated Sm-like protein LSm7 OS=Mus musculus GN=Lsm7 PE=1 SV=1 - [LSM7_MOUSE]	7.77	1	1	1	1	103	11.629	5.2749
Q9CXT8	Mitochondrial-processing peptidase subunit beta OS=Mus musculus GN=Pmpcb PE=1 SV=1 - [MPPB_MOUSE]	15.13	1	4	4	9	489	54.5797	6.99072
Q8VDD5	Myosin-9 OS=Mus musculus GN=Myh9 PE=1 SV=4 - [MYH9_MOUSE]	1.38	1	2	3	4	1960	226.232	5.65576
P70232	Neural cell adhesion molecule L1-like protein OS=Mus musculus GN=Chl1 PE=1 SV=2 - [NCHL1_MOUSE]	4.22	1	3	3	5	1209	134.99	5.56689
Q9QYG0	Protein NDRG2 OS=Mus musculus GN=Ndrg2 PE=1 SV=1 - [NDRG2_MOUSE]	30.73	1	8	8	51	371	40.7632	5.40186
Q80TM9	Nischarin OS=Mus musculus GN=Nisch PE=1 SV=2 - [NISCH_MOUSE]	1.32	2	2	2	2	1593	174.903	5.16064
Q9CQ75	NADH dehydrogenase [ubiquinone] 1 alpha subcomplex subunit 2 OS=Mus musculus GN=Ndufa2 PE=1 SV=3 - [NDUA2_MOUSE]	65.66	1	9	9	64	99	10.9088	9.99365
Q9DCT2	NADH dehydrogenase [ubiquinone] iron-sulfur protein 3, mitochondrial OS=Mus musculus GN=Ndufs3 PE=1 SV=2 - [NDUS3_MOUSE]	13.31	1	4	4	31	263	30.1305	7.1665
O88998	Noelin OS=Mus musculus GN=Olfm1 PE=1 SV=1 - [NOE1_MOUSE]	11.96	3	1	3	11	485	55.3625	6.94678
Q9JKN6	RNA-binding protein Nova-1 OS=Mus musculus GN=Nova1 PE=1 SV=2 - [NOVA1_MOUSE]	14.4	1	3	6	10	507	51.724	8.71924
O70340	Neuronal pentraxin-2 OS=Mus musculus GN=Nptx2 PE=2 SV=1 - [NPTX2_MOUSE]	2.8	1	1	1	1	429	47.1074	5.80811
O70400	PDZ and LIM domain protein 1 OS=Mus musculus GN=Pdlim1 PE=1 SV=4 - [PDLI1_MOUSE]	18.04	2	3	3	7	327	35.7519	6.84424
Q03958	Prefoldin subunit 6 OS=Mus musculus GN=Pfdn6 PE=1 SV=1 - [PFD6_MOUSE]	73.23	2	7	7	13	127	14.4457	8.88037
Q8BH04	Phosphoenolpyruvate carboxykinase [GTP], mitochondrial OS=Mus musculus GN=Pck2 PE=1 SV=1 - [PCKGM_MOUSE]	9.22	2	4	4	13	640	70.4825	7.28369
P60487	Pyridoxal phosphate phosphatase OS=Mus musculus GN=Pdxp PE=1 SV=1 - [PLPP_MOUSE]	46.23	1	7	7	29	292	31.4921	5.74463
O35405	Phospholipase D3 OS=Mus musculus GN=Pld3 PE=1 SV=1 - [PLD3_MOUSE]	4.92	1	1	1	5	488	54.3544	6.52197
O35226	26S proteasome non-ATPase regulatory subunit 4 OS=Mus musculus GN=Psmd4 PE=1 SV=1 - [PSMD4_MOUSE]	31.12	2	8	8	17	376	40.6782	4.79248
Q8VDQ1	Prostaglandin reductase 2 OS=Mus musculus GN=Ptgr2 PE=1 SV=2 - [PTGR2_MOUSE]	26.78	3	6	6	21	351	37.991	5.41455
Q9D0J8	Parathymosin OS=Mus musculus GN=Ptms PE=1 SV=3 - [PTMS_MOUSE]	13.86	1	2	2	7	101	11.4231	4.22119
A2A8L5	Receptor-type tyrosine-protein phosphatase F OS=Mus musculus GN=Ptprf PE=1 SV=1 - [PTPRF_MOUSE]	1.58	1	1	2	3	1898	211.356	6.65381
B0V2N1	Receptor-type tyrosine-protein phosphatase S OS=Mus musculus GN=Ptprs PE=1 SV=1 - [PTPRS_MOUSE]	6.29	1	7	7	10	1907	211.771	7.2251
Q8CI08	SLAIN motif-containing protein 2 OS=Mus musculus GN=Slain2 PE=1 SV=2 - [SLAI2_MOUSE]	2.93	1	1	1	1	581	62.3402	9.46631
Q9JJ43	RNA binding protein fox-1 homolog 1 OS=Mus musculus GN=Rbfox1 PE=1 SV=3 - [RFOX1_MOUSE]	4.55	1	1	1	5	396	42.6517	6.85889
Q9EQZ7	Regulating synaptic membrane exocytosis protein 2 OS=Mus musculus GN=Rims2 PE=1 SV=1 - [RIMS2_MOUSE]	1.44	2	1	1	3	1530	172.757	9.24658
A2ALS5	Rap1 GTPase-activating protein 1 OS=Mus musculus GN=Rap1gap PE=1 SV=2 - [RPGP1_MOUSE]	11.01	3	2	5	5	663	73.3874	5.87158
P47708	Rabphilin-3A OS=Mus musculus GN=Rph3a PE=1 SV=2 - [RP3A_MOUSE]	32.89	1	16	16	44	681	75.4417	8.26514
Q99J08	SEC14-like protein 2 OS=Mus musculus GN=Sec14l2 PE=1 SV=1 - [S14L2_MOUSE]	8.44	1	2	2	2	403	46.2706	7.10791
E9Q401	Ryanodine receptor 2 OS=Mus musculus GN=Ryr2 PE=1 SV=1 - [RYR2_MOUSE]	0.68	2	2	2	4	4966	564.458	6.0874
Q99P72	Reticulon-4 OS=Mus musculus GN=Rtn4 PE=1 SV=2 - [RTN4_MOUSE]	4.65	1	2	2	3	1162	126.535	4.53857
A2ASZ8	Calcium-binding mitochondrial carrier protein SCaMC-2 OS=Mus musculus GN=Slc25a25 PE=1 SV=1 - [SCMC2_MOUSE]	5.12	1	1	1	1	469	52.5872	8.54346
Q78YZ6	Short coiled-coil protein OS=Mus musculus GN=Scoc PE=1 SV=1 - [SCOC_MOUSE]	36.8	1	2	2	2	125	14.1459	4.67822
Q9DBC0	Selenoprotein O OS=Mus musculus GN=Selo PE=1 SV=4 - [SELO_MOUSE]	3	1	1	1	1	667	74.175	5.8335
P09671	Superoxide dismutase [Mn], mitochondrial OS=Mus musculus GN=Sod2 PE=1 SV=3 - [SODM_MOUSE]	19.37	1	3	3	11	222	24.5875	8.6167
Q99L88	Beta-1-syntrophin OS=Mus musculus GN=Sntb1 PE=1 SV=4 - [SNTB1_MOUSE]	3.91	1	1	1	1	537	58.045	8.30908
P61264	Syntaxin-1B OS=Mus musculus GN=Stx1b PE=1 SV=1 - [STX1B_MOUSE]	35.76	5	14	15	57	288	33.2238	5.37646
Q9WVA4	Transgelin-2 OS=Mus musculus GN=Tagln2 PE=1 SV=4 - [TAGL2_MOUSE]	38.19	2	5	6	7	199	22.3812	8.23584
Q9CZD3	Glycine--tRNA ligase OS=Mus musculus GN=Gars PE=1 SV=1 - [SYG_MOUSE]	7.54	1	3	3	4	729	81.8257	6.65381
Q9WV96	Mitochondrial import inner membrane translocase subunit Tim10 B OS=Mus musculus GN=Timm10b PE=1 SV=1 - [T10B_MOUSE]	34	7	4	4	28	100	11.3066	7.07861
O08784	Treacle protein OS=Mus musculus GN=Tcof1 PE=1 SV=1 - [TCOF_MOUSE]	3.64	4	2	2	4	1320	134.921	9.34912
P80316	T-complex protein 1 subunit epsilon OS=Mus musculus GN=Cct5 PE=1 SV=1 - [TCPE_MOUSE]	29.94	2	12	13	40	541	59.5859	6.02393
Q9ESN6	Tripartite motif-containing protein 2 OS=Mus musculus GN=Trim2 PE=1 SV=1 - [TRIM2_MOUSE]	9.68	6	4	4	8	744	81.3941	6.96143
Q9QZ06	Toll-interacting protein OS=Mus musculus GN=Tollip PE=1 SV=1 - [TOLIP_MOUSE]	37.23	4	5	5	19	274	30.325	5.17334
O54818	Tumor protein D53 OS=Mus musculus GN=Tpd52l1 PE=1 SV=1 - [TPD53_MOUSE]	6.86	1	1	1	1	204	22.5011	6.21436
Q9JKK7	Tropomodulin-2 OS=Mus musculus GN=Tmod2 PE=1 SV=2 - [TMOD2_MOUSE]	37.61	1	9	9	26	351	39.4866	5.35107
Q8BH48	Ubiquitin-associated protein 1 OS=Mus musculus GN=Ubap1 PE=1 SV=1 - [UBAP1_MOUSE]	5.98	2	2	2	2	502	54.9934	5.07178
Q9D1K2	V-type proton ATPase subunit F OS=Mus musculus GN=Atp6v1f PE=1 SV=2 - [VATF_MOUSE]	51.26	3	4	4	12	119	13.362	5.8208
Q8CBE3	WD repeat-containing protein 37 OS=Mus musculus GN=Wdr37 PE=1 SV=1 - [WDR37_MOUSE]	12.5	2	4	4	13	496	55.0118	7.2251
Q91V09	WD repeat-containing protein 13 OS=Mus musculus GN=Wdr13 PE=1 SV=1 - [WDR13_MOUSE]	17.32	3	5	5	8	485	53.6302	9.14404
A2AQE4	COP9 signalosome complex subunit 2 OS=Mus musculus GN=Cops2 PE=1 SV=1 - [A2AQE4_MOUSE]	5.72	2	2	2	2	402	46.8843	5.16064
A0A1B0GSR9	L-lactate dehydrogenase A chain OS=Mus musculus GN=Ldha PE=1 SV=1 - [A0A1B0GSR9_MOUSE]	22.86	12	4	5	23	315	34.5773	8.55811
A0A0G2JFY9	Spermatogenesis-associated protein 1 (Fragment) OS=Mus musculus GN=Spata1 PE=1 SV=1 - [A0A0G2JFY9_MOUSE]	14.67	3	1	1	1	75	8.67161	10.0669
A0A0R4J0F6	Cyclin-G-associated kinase OS=Mus musculus GN=Gak PE=1 SV=1 - [A0A0R4J0F6_MOUSE]	2.45	4	1	2	2	1305	143.58	5.69385
A0A140LIZ5	26S protease regulatory subunit 6B OS=Mus musculus GN=Psmc4 PE=1 SV=1 - [A0A140LIZ5_MOUSE]	23	2	5	6	31	387	43.5226	5.26221
A0A0A0MQB8	Homeobox protein Meis1 OS=Mus musculus GN=Meis1 PE=1 SV=1 - [A0A0A0MQB8_MOUSE]	12.61	3	1	1	1	349	38.5897	6.39209
A2A547	Ribosomal protein L19 OS=Mus musculus GN=Rpl19 PE=1 SV=1 - [A2A547_MOUSE]	14.43	2	3	3	5	194	23.2332	11.4731
F6RPX5	Alpha-tubulin N-acetyltransferase 1 (Fragment) OS=Mus musculus GN=Atat1 PE=1 SV=1 - [F6RPX5_MOUSE]	10.94	2	1	1	6	128	14.1255	11.7075
A3KGE4	Noelin OS=Mus musculus GN=Olfm1 PE=1 SV=1 - [A3KGE4_MOUSE]	14.03	2	1	3	10	442	50.9951	6.53662
A0A0R4J252	Transporter (Fragment) OS=Mus musculus GN=Slc6a17 PE=1 SV=1 - [A0A0R4J252_MOUSE]	5.1	3	3	3	32	686	76.432	6.45557
B1AVN9	Phosphatase and actin regulator (Fragment) OS=Mus musculus GN=Phactr2 PE=1 SV=1 - [B1AVN9_MOUSE]	2.5	5	1	1	1	560	61.7263	5.69385
A0A0G2JGY9	Phospholipid phosphatase-related protein type 4 (Fragment) OS=Mus musculus GN=Plppr4 PE=1 SV=1 - [A0A0G2JGY9_MOUSE]	3.54	2	2	2	2	707	76.6986	8.93896
E9Q2H1	E3 ubiquitin-protein ligase UBR5 OS=Mus musculus GN=Ubr5 PE=1 SV=1 - [E9Q2H1_MOUSE]	1.04	1	1	1	1	2798	308.774	5.8335
A2AMH3	Choline transporter-like protein 1 OS=Mus musculus GN=Slc44a1 PE=1 SV=1 - [A2AMH3_MOUSE]	5.7	4	2	2	3	526	59.0782	9.27588
F8WGG5	Phosphatidylinositol transfer protein alpha isoform OS=Mus musculus GN=Pitpna PE=1 SV=1 - [F8WGG5_MOUSE]	22.22	6	3	3	3	99	11.1116	5.42725
G3UZR1	Tubulin beta-5 chain (Fragment) OS=Mus musculus GN=Tubb5 PE=1 SV=8 - [G3UZR1_MOUSE]	92.42	1	1	3	86	66	7.20238	4.94482
F6TZK4	Regulating synaptic membrane exocytosis protein 1 OS=Mus musculus GN=Rims1 PE=1 SV=2 - [F6TZK4_MOUSE]	5.32	9	4	4	8	1260	139.639	9.18799
G3UZM4	Cell adhesion molecule 2 (Fragment) OS=Mus musculus GN=Cadm2 PE=1 SV=1 - [G3UZM4_MOUSE]	19.08	2	3	3	35	435	47.316	5.41455
Q7TQE2	Zyx protein OS=Mus musculus GN=Zyx PE=1 SV=1 - [Q7TQE2_MOUSE]	13.7	5	4	4	7	533	56.99	6.63916
A7E1Z5	Anion exchange protein OS=Mus musculus GN=Slc4a4 PE=1 SV=1 - [A7E1Z5_MOUSE]	11.31	2	1	6	16	1070	120.387	6.84424
A0A0R4J0I9	Low density lipoprotein receptor-related protein 1 OS=Mus musculus GN=Lrp1 PE=1 SV=1 - [A0A0R4J0I9_MOUSE]	2.53	2	7	7	10	4545	504.441	5.36377
Q0VGU4	MCG18019 OS=Mus musculus GN=Vgf PE=1 SV=1 - [Q0VGU4_MOUSE]	27.88	2	11	11	34	617	68.1909	4.70361
D3YZU6	Hydroxyacylglutathione hydrolase-like protein OS=Mus musculus GN=Haghl PE=1 SV=1 - [D3YZU6_MOUSE]	12.77	2	2	2	3	235	26.0929	5.90967
A0A0R4J0M1	Tubulin-specific chaperone C OS=Mus musculus GN=Tbcc PE=1 SV=1 - [A0A0R4J0M1_MOUSE]	6.16	2	2	2	2	341	38.0712	5.30029
G3UW88	MCG65130 OS=Mus musculus GN=Gm44 PE=4 SV=1 - [G3UW88_MOUSE]	2.73	1	1	1	1	330	37.7023	8.08936
Q3U4W8	Ubiquitin carboxyl-terminal hydrolase 5 OS=Mus musculus GN=Usp5 PE=1 SV=1 - [Q3U4W8_MOUSE]	24.31	4	12	12	49	835	93.2954	5.05908
Q6DFY2	Opioid binding protein/cell adhesion molecule-like OS=Mus musculus GN=Opcml PE=1 SV=1 - [Q6DFY2_MOUSE]	17.21	2	4	6	11	337	37.1328	6.68311
Q8BRQ9	Sideroflexin OS=Mus musculus GN=Sfxn5 PE=1 SV=1 - [Q8BRQ9_MOUSE]	6.29	2	1	1	2	302	32.7622	9.36377
Q3U4F0	Sideroflexin-3 OS=Mus musculus GN=Sfxn3 PE=1 SV=1 - [Q3U4F0_MOUSE]	45.55	2	9	11	48	281	30.932	8.98291
Q6PDK0	Protein Zbtb39 OS=Mus musculus GN=Zbtb39 PE=1 SV=1 - [Q6PDK0_MOUSE]	1.4	1	1	1	1	712	78.9975	6.50732
Q9D6T9	28S ribosomal protein S36, mitochondrial OS=Mus musculus GN=Mrps36 PE=1 SV=1 - [Q9D6T9_MOUSE]	39	2	5	5	17	100	10.9357	9.99365
D3YYI8	Histone deacetylase OS=Mus musculus GN=Gm10093 PE=3 SV=1 - [D3YYI8_MOUSE]	1.24	4	1	1	1	482	55.0126	5.42725
F8VQE9	Arf-GAP with GTPase, ANK repeat and PH domain-containing protein 3 OS=Mus musculus GN=Agap3 PE=1 SV=1 - [F8VQE9_MOUSE]	2.97	4	2	2	3	910	97.6344	7.76709
H3BJP2	S-formylglutathione hydrolase (Fragment) OS=Mus musculus GN=Esd PE=1 SV=1 - [H3BJP2_MOUSE]	34.82	8	4	4	19	247	27.1132	6.85889
B7ZC59	Sterile alpha motif domain-containing protein 14 (Fragment) OS=Mus musculus GN=Samd14 PE=1 SV=1 - [B7ZC59_MOUSE]	10.61	2	1	1	1	132	14.1261	7.56201
F7C0F2	Breast carcinoma-amplified sequence 3 homolog (Fragment) OS=Mus musculus GN=Bcas3 PE=1 SV=1 - [F7C0F2_MOUSE]	6.2	6	3	3	4	693	74.981	6.58057
B1AZQ0	Proenkephalin-A (Fragment) OS=Mus musculus GN=Penk PE=1 SV=1 - [B1AZQ0_MOUSE]	14.04	2	1	1	13	178	20.1187	5.18604
A0A140T8V1	Protein Fabp3-ps1 OS=Mus musculus GN=Fabp3-ps1 PE=3 SV=1 - [A0A140T8V1_MOUSE]	6.77	2	1	1	1	133	14.9247	7.34229
A2AKJ9	Syntenin-1 OS=Mus musculus GN=Sdcbp PE=1 SV=1 - [A2AKJ9_MOUSE]	20.1	5	2	2	3	199	21.4951	6.17627
F6T1Y2	Rho GTPase-activating protein 44 (Fragment) OS=Mus musculus GN=Arhgap44 PE=1 SV=1 - [F6T1Y2_MOUSE]	7.13	2	2	2	3	645	69.8702	6.85889
D3Z111	Acyl-protein thioesterase 1 OS=Mus musculus GN=Lypla1 PE=1 SV=1 - [D3Z111_MOUSE]	15.31	6	2	2	3	196	21.1375	6.17627
E9Q8N8	Anion exchange protein OS=Mus musculus GN=Slc4a4 PE=1 SV=1 - [E9Q8N8_MOUSE]	13.07	2	3	8	31	1094	123.008	6.88818
D3YZZ4	TSC22 domain family protein 4 OS=Mus musculus GN=Tsc22d4 PE=1 SV=1 - [D3YZZ4_MOUSE]	23.21	3	3	3	15	168	17.567	8.51416
E9Q1X8	Voltage-dependent calcium channel subunit alpha-2/delta-1 OS=Mus musculus GN=Cacna2d1 PE=1 SV=2 - [E9Q1X8_MOUSE]	11.18	3	8	8	20	1091	123.128	5.17334
P62908	40S ribosomal protein S3 OS=Mus musculus GN=Rps3 PE=1 SV=1 - [RS3_MOUSE]	15.64	1	2	2	2	243	26.6574	9.65674
Q9D115	Zinc finger protein 706 OS=Mus musculus GN=Znf706 PE=1 SV=1 - [ZN706_MOUSE]	14.47	1	1	1	2	76	8.49245	10.0083
P62317	Small nuclear ribonucleoprotein Sm D2 OS=Mus musculus GN=Snrpd2 PE=1 SV=1 - [SMD2_MOUSE]	23.73	2	2	2	2	118	13.5182	9.90576
P63276	40S ribosomal protein S17 OS=Mus musculus GN=Rps17 PE=1 SV=2 - [RS17_MOUSE]	42.96	1	4	4	9	135	15.5144	9.84717
O88952	Protein lin-7 homolog C OS=Mus musculus GN=Lin7c PE=1 SV=2 - [LIN7C_MOUSE]	18.78	1	2	3	11	197	21.8205	8.42627
P62827	GTP-binding nuclear protein Ran OS=Mus musculus GN=Ran PE=1 SV=3 - [RAN_MOUSE]	18.98	2	4	4	11	216	24.4076	7.48877
P63001	Ras-related C3 botulinum toxin substrate 1 OS=Mus musculus GN=Rac1 PE=1 SV=1 - [RAC1_MOUSE]	21.88	3	4	6	32	192	21.4362	8.49951
Q60972	Histone-binding protein RBBP4 OS=Mus musculus GN=Rbbp4 PE=1 SV=5 - [RBBP4_MOUSE]	4.71	5	2	2	3	425	47.6261	4.89404
P62852	40S ribosomal protein S25 OS=Mus musculus GN=Rps25 PE=1 SV=1 - [RS25_MOUSE]	22.4	1	4	4	7	125	13.7337	10.1108
P61963	DDB1- and CUL4-associated factor 7 OS=Mus musculus GN=Dcaf7 PE=1 SV=1 - [DCAF7_MOUSE]	5.26	1	1	1	1	342	38.9011	5.51611
Q9CPW4	Actin-related protein 2/3 complex subunit 5 OS=Mus musculus GN=Arpc5 PE=1 SV=3 - [ARPC5_MOUSE]	23.18	2	2	2	3	151	16.2783	5.66846
P12961	Neuroendocrine protein 7B2 OS=Mus musculus GN=Scg5 PE=1 SV=1 - [7B2_MOUSE]	14.15	1	2	2	4	212	23.8509	5.80811
Q61151	Serine/threonine-protein phosphatase 2A 56 kDa regulatory subunit epsilon isoform OS=Mus musculus GN=Ppp2r5e PE=1 SV=3 - [2A5E_MOUSE]	7.49	1	3	3	5	467	54.6785	6.94678
Q8BW75	Amine oxidase [flavin-containing] B OS=Mus musculus GN=Maob PE=1 SV=4 - [AOFB_MOUSE]	7.31	3	2	3	3	520	58.5204	8.29443
O08915	AH receptor-interacting protein OS=Mus musculus GN=Aip PE=1 SV=1 - [AIP_MOUSE]	10	1	2	2	8	330	37.5811	6.40479
Q80ZD9	Amphoterin-induced protein 2 OS=Mus musculus GN=Amigo2 PE=1 SV=1 - [AMGO2_MOUSE]	4.24	1	1	1	1	519	57.5254	8.47021
Q3V140	Acrosin-binding protein OS=Mus musculus GN=Acrbp PE=1 SV=1 - [ACRBP_MOUSE]	2.78	1	1	1	1	540	61.1012	4.98291
P31230	Aminoacyl tRNA synthase complex-interacting multifunctional protein 1 OS=Mus musculus GN=Aimp1 PE=1 SV=2 - [AIMP1_MOUSE]	26.45	6	6	6	15	310	33.9759	8.35303
Q8R010	Aminoacyl tRNA synthase complex-interacting multifunctional protein 2 OS=Mus musculus GN=Aimp2 PE=1 SV=2 - [AIMP2_MOUSE]	13.75	2	3	3	4	320	35.3552	7.82568
P45376	Aldose reductase OS=Mus musculus GN=Akr1b1 PE=1 SV=3 - [ALDR_MOUSE]	18.67	2	5	5	23	316	35.7095	7.18115
Q6PD24	Ankyrin repeat domain-containing protein 13D OS=Mus musculus GN=Ankrd13d PE=1 SV=2 - [AN13D_MOUSE]	1.98	1	1	1	1	605	68.0334	5.46533
Q9DBG3	AP-2 complex subunit beta OS=Mus musculus GN=Ap2b1 PE=1 SV=1 - [AP2B1_MOUSE]	12.59	4	7	8	13	937	104.516	5.37646
Q8CG72	Poly(ADP-ribose) glycohydrolase ARH3 OS=Mus musculus GN=Adprhl2 PE=1 SV=1 - [ARHL2_MOUSE]	13.78	1	3	3	7	370	39.3894	4.95752
Q8BHE3	Caytaxin OS=Mus musculus GN=Atcay PE=1 SV=1 - [ATCAY_MOUSE]	13.17	1	2	2	7	372	42.1519	4.67822
Q8BGS2	BolA-like protein 2 OS=Mus musculus GN=Bola2 PE=1 SV=1 - [BOLA2_MOUSE]	62.79	1	3	3	3	86	10.2082	6.16357
Q8CAK1	Putative transferase CAF17 homolog, mitochondrial OS=Mus musculus GN=Iba57 PE=1 SV=1 - [CAF17_MOUSE]	10.06	2	3	3	8	358	38.375	9.01221
Q9D920	BLOC-1-related complex subunit 5 OS=Mus musculus GN=Borcs5 PE=1 SV=1 - [BORC5_MOUSE]	28.21	2	3	3	4	195	22.1062	6.55127
Q69Z98	Serine/threonine-protein kinase BRSK2 OS=Mus musculus GN=Brsk2 PE=1 SV=2 - [BRSK2_MOUSE]	8.71	5	3	3	10	735	81.6821	8.79248
Q8VE95	UPF0598 protein C8orf82 homolog OS=Mus musculus PE=1 SV=1 - [CH082_MOUSE]	12.39	1	1	1	1	218	24.3143	8.70459
P40240	CD9 antigen OS=Mus musculus GN=Cd9 PE=1 SV=2 - [CD9_MOUSE]	11.06	1	1	1	8	226	25.2409	7.2251
Q99M71	Mammalian ependymin-related protein 1 OS=Mus musculus GN=Epdr1 PE=1 SV=1 - [EPDR1_MOUSE]	10.27	1	2	2	9	224	25.4687	7.57666
Q3USW5	FAD-dependent oxidoreductase domain-containing protein 2 OS=Mus musculus GN=Foxred2 PE=2 SV=1 - [FXRD2_MOUSE]	1.5	1	1	1	1	665	75.9562	6.87354
Q9QYY0	GRB2-associated-binding protein 1 OS=Mus musculus GN=Gab1 PE=1 SV=2 - [GAB1_MOUSE]	10.22	2	3	3	3	695	76.7643	5.66846
Q9D964	Glycine amidinotransferase, mitochondrial OS=Mus musculus GN=Gatm PE=1 SV=1 - [GATM_MOUSE]	2.13	1	1	1	1	423	48.2661	7.88428
P06745	Glucose-6-phosphate isomerase OS=Mus musculus GN=Gpi PE=1 SV=4 - [G6PI_MOUSE]	26.34	4	11	11	20	558	62.7272	8.1333
Q9CQI3	Glia maturation factor beta OS=Mus musculus GN=Gmfb PE=1 SV=3 - [GMFB_MOUSE]	47.18	5	8	8	16	142	16.7124	5.16064
Q8BFR4	N-acetylglucosamine-6-sulfatase OS=Mus musculus GN=Gns PE=1 SV=1 - [GNS_MOUSE]	2.39	1	1	1	3	544	61.1357	8.23584
Q3UHX2	28 kDa heat- and acid-stable phosphoprotein OS=Mus musculus GN=Pdap1 PE=1 SV=1 - [HAP28_MOUSE]	18.23	1	2	2	2	181	20.5925	7.38623
O88703	Potassium/sodium hyperpolarization-activated cyclic nucleotide-gated channel 2 OS=Mus musculus GN=Hcn2 PE=1 SV=1 - [HCN2_MOUSE]	6.6	11	3	4	21	863	94.6612	8.73389
Q6IR34	G-protein-signaling modulator 1 OS=Mus musculus GN=Gpsm1 PE=1 SV=3 - [GPSM1_MOUSE]	17.38	4	6	6	15	673	74.3162	6.22705
P97772	Metabotropic glutamate receptor 1 OS=Mus musculus GN=Grm1 PE=1 SV=2 - [GRM1_MOUSE]	1.92	1	1	1	1	1199	133.127	6.85889
Q78WH7	Calcium/calmodulin-dependent protein kinase II inhibitor 2 OS=Mus musculus GN=Camk2n2 PE=1 SV=1 - [CK2N2_MOUSE]	36.71	1	2	2	4	79	8.62229	5.47803
Q9WUM4	Coronin-1C OS=Mus musculus GN=Coro1c PE=1 SV=2 - [COR1C_MOUSE]	22.57	3	7	7	25	474	53.087	7.07861
Q8BT51	Cytochrome c oxidase assembly factor 4 homolog, mitochondrial OS=Mus musculus GN=COA4 PE=3 SV=1 - [COA4_MOUSE]	21.84	1	1	1	2	87	10.1287	6.90283
O88485	Cytoplasmic dynein 1 intermediate chain 1 OS=Mus musculus GN=Dync1i1 PE=1 SV=2 - [DC1I1_MOUSE]	14.33	2	1	6	75	628	70.6806	5.12256
Q99LB2	Dehydrogenase/reductase SDR family member 4 OS=Mus musculus GN=Dhrs4 PE=1 SV=3 - [DHRS4_MOUSE]	3.23	1	1	1	1	279	29.8657	9.37842
Q3UH60	Disco-interacting protein 2 homolog B OS=Mus musculus GN=Dip2b PE=1 SV=1 - [DIP2B_MOUSE]	2.03	1	2	2	4	1574	171.017	8.08936
P51660	Peroxisomal multifunctional enzyme type 2 OS=Mus musculus GN=Hsd17b4 PE=1 SV=3 - [DHB4_MOUSE]	8.16	1	4	4	7	735	79.432	8.57275
Q9QYJ0	DnaJ homolog subfamily A member 2 OS=Mus musculus GN=Dnaja2 PE=1 SV=1 - [DNJA2_MOUSE]	24.51	1	8	8	21	412	45.7166	6.48096
Q80VP1	Epsin-1 OS=Mus musculus GN=Epn1 PE=1 SV=3 - [EPN1_MOUSE]	11.3	1	2	2	11	575	60.1747	4.80518
A2ARK0	Protein FAM83C OS=Mus musculus GN=Fam83c PE=2 SV=1 - [FA83C_MOUSE]	1.16	1	1	1	1	776	84.0184	7.26904
P23591	GDP-L-fucose synthase OS=Mus musculus GN=Tsta3 PE=1 SV=3 - [FCL_MOUSE]	3.74	1	1	1	1	321	35.855	6.7417
Q9CRY7	Glycerophosphodiester phosphodiesterase domain-containing protein 1 OS=Mus musculus GN=Gdpd1 PE=1 SV=1 - [GDPD1_MOUSE]	3.82	1	1	1	1	314	35.8439	8.30908
P17095	High mobility group protein HMG-I/HMG-Y OS=Mus musculus GN=Hmga1 PE=1 SV=4 - [HMGA1_MOUSE]	41.12	1	2	2	12	107	11.6071	10.3159
P38060	Hydroxymethylglutaryl-CoA lyase, mitochondrial OS=Mus musculus GN=Hmgcl PE=1 SV=2 - [HMGCL_MOUSE]	28.92	5	7	7	27	325	34.2167	8.41162
Q8BUK6	Protein Hook homolog 3 OS=Mus musculus GN=Hook3 PE=1 SV=2 - [HOOK3_MOUSE]	3.76	2	2	2	3	718	83.1665	5.18604
Q9JKR6	Hypoxia up-regulated protein 1 OS=Mus musculus GN=Hyou1 PE=1 SV=1 - [HYOU1_MOUSE]	15.82	3	9	9	16	999	111.112	5.18604
P34914	Bifunctional epoxide hydrolase 2 OS=Mus musculus GN=Ephx2 PE=1 SV=2 - [HYES_MOUSE]	4.87	1	1	1	1	554	62.4746	6.18896
P54071	Isocitrate dehydrogenase [NADP], mitochondrial OS=Mus musculus GN=Idh2 PE=1 SV=3 - [IDHP_MOUSE]	20.13	4	7	7	10	452	50.8739	8.68994
O70139	cAMP-dependent protein kinase inhibitor gamma OS=Mus musculus GN=Pkig PE=1 SV=1 - [IPKG_MOUSE]	73.68	3	2	2	21	76	7.93856	4.2085
P49442	Inositol polyphosphate 1-phosphatase OS=Mus musculus GN=Inpp1 PE=1 SV=2 - [INPP_MOUSE]	15.4	1	3	3	7	396	43.3189	5.0083
Q9QZS3	Protein numb homolog OS=Mus musculus GN=Numb PE=1 SV=1 - [NUMB_MOUSE]	6.43	6	3	3	3	653	70.7686	8.646
Q99MN9	Propionyl-CoA carboxylase beta chain, mitochondrial OS=Mus musculus GN=Pccb PE=1 SV=2 - [PCCB_MOUSE]	30.5	4	11	11	26	541	58.3719	7.66455
Q9R0Y5	Adenylate kinase isoenzyme 1 OS=Mus musculus GN=Ak1 PE=1 SV=1 - [KAD1_MOUSE]	60.31	3	12	12	62	194	21.5261	5.80811
P14733	Lamin-B1 OS=Mus musculus GN=Lmnb1 PE=1 SV=3 - [LMNB1_MOUSE]	17.86	1	7	8	8	588	66.7448	5.16064
Q922Q1	Mitochondrial amidoxime reducing component 2 OS=Mus musculus GN=Marc2 PE=1 SV=1 - [MARC2_MOUSE]	17.75	2	3	3	3	338	38.1696	8.67529
Q8C1S0	Mediator of RNA polymerase II transcription subunit 19 OS=Mus musculus GN=Med19 PE=1 SV=1 - [MED19_MOUSE]	10.25	1	1	1	1	244	26.2465	9.87646
Q9JK81	UPF0160 protein MYG1, mitochondrial OS=Mus musculus GN=Myg1 PE=1 SV=1 - [MYG1_MOUSE]	16.84	3	4	4	5	380	42.6956	7.02002
Q9ERS2	NADH dehydrogenase [ubiquinone] 1 alpha subcomplex subunit 13 OS=Mus musculus GN=Ndufa13 PE=1 SV=3 - [NDUAD_MOUSE]	42.36	1	4	4	18	144	16.8486	9.48096
Q7TMF3	NADH dehydrogenase [ubiquinone] 1 alpha subcomplex subunit 12 OS=Mus musculus GN=Ndufa12 PE=1 SV=2 - [NDUAC_MOUSE]	28.97	2	3	3	6	145	17.0756	9.36377
P21661	Neuroendocrine convertase 2 OS=Mus musculus GN=Pcsk2 PE=1 SV=1 - [NEC2_MOUSE]	8.48	1	3	3	4	637	70.7407	6.41748
Q8VDK1	Nitrilase homolog 1 OS=Mus musculus GN=Nit1 PE=1 SV=2 - [NIT1_MOUSE]	22.6	1	4	4	5	323	35.682	7.94287
Q9CQZ5	NADH dehydrogenase [ubiquinone] 1 alpha subcomplex subunit 6 OS=Mus musculus GN=Ndufa6 PE=1 SV=1 - [NDUA6_MOUSE]	23.66	1	3	3	5	131	15.273	10.1108
Q9JJF0	Nucleosome assembly protein 1-like 5 OS=Mus musculus GN=Nap1l5 PE=1 SV=1 - [NP1L5_MOUSE]	16.67	1	4	4	5	156	17.013	4.32275
Q7M6Y3	Phosphatidylinositol-binding clathrin assembly protein OS=Mus musculus GN=Picalm PE=1 SV=1 - [PICAL_MOUSE]	4.09	4	1	2	2	660	71.4983	7.91357
Q9D0F9	Phosphoglucomutase-1 OS=Mus musculus GN=Pgm1 PE=1 SV=4 - [PGM1_MOUSE]	5.52	2	2	2	2	562	61.3796	6.56592
Q8BWR2	PITH domain-containing protein 1 OS=Mus musculus GN=Pithd1 PE=1 SV=1 - [PITH1_MOUSE]	12.32	1	2	2	3	211	24.1768	5.74463
Q8BP40	Lysophosphatidic acid phosphatase type 6 OS=Mus musculus GN=Acp6 PE=1 SV=1 - [PPA6_MOUSE]	11	1	3	3	3	418	47.5946	7.72314
Q91VC7	Protein phosphatase 1 regulatory subunit 14A OS=Mus musculus GN=Ppp1r14a PE=1 SV=1 - [PP14A_MOUSE]	22.45	2	2	2	6	147	16.6385	7.34229
Q62084	Protein phosphatase 1 regulatory subunit 14B OS=Mus musculus GN=Ppp1r14b PE=1 SV=2 - [PP14B_MOUSE]	17.01	1	1	1	4	147	15.9471	4.85596
Q9CWJ9	Bifunctional purine biosynthesis protein PURH OS=Mus musculus GN=Atic PE=1 SV=2 - [PUR9_MOUSE]	26.52	1	9	9	22	592	64.1771	6.75635
Q9CZT8	Ras-related protein Rab-3B OS=Mus musculus GN=Rab3b PE=1 SV=1 - [RAB3B_MOUSE]	15.07	2	1	2	3	219	24.7412	5.10986
O09164	Extracellular superoxide dismutase [Cu-Zn] OS=Mus musculus GN=Sod3 PE=1 SV=1 - [SODE_MOUSE]	16.73	1	2	2	6	251	27.3747	6.84424
Q91ZM2	SH2B adapter protein 1 OS=Mus musculus GN=Sh2b1 PE=1 SV=2 - [SH2B1_MOUSE]	3.04	1	1	1	1	756	79.5757	5.24951
Q9D1G1	Ras-related protein Rab-1B OS=Mus musculus GN=Rab1b PE=1 SV=1 - [RAB1B_MOUSE]	20.9	1	3	3	6	201	22.1732	5.73193
Q921J2	GTP-binding protein Rheb OS=Mus musculus GN=Rheb PE=1 SV=1 - [RHEB_MOUSE]	8.7	1	1	1	1	184	20.4385	5.92236
Q9CT10	Ran-binding protein 3 OS=Mus musculus GN=Ranbp3 PE=1 SV=2 - [RANB3_MOUSE]	5.91	1	2	2	2	491	52.5407	5.12256
Q9EPU0	Regulator of nonsense transcripts 1 OS=Mus musculus GN=Upf1 PE=1 SV=2 - [RENT1_MOUSE]	6.76	1	4	4	16	1124	123.889	6.60986
Q00915	Retinol-binding protein 1 OS=Mus musculus GN=Rbp1 PE=1 SV=2 - [RET1_MOUSE]	15.56	1	3	3	12	135	15.8358	5.24951
Q811P8	Rho GTPase-activating protein 32 OS=Mus musculus GN=Arhgap32 PE=1 SV=2 - [RHG32_MOUSE]	6.37	4	6	6	14	2089	229.576	6.85889
O09167	60S ribosomal protein L21 OS=Mus musculus GN=Rpl21 PE=1 SV=3 - [RL21_MOUSE]	18.75	2	4	4	4	160	18.5501	10.4917
Q8VDS4	Regulation of nuclear pre-mRNA domain-containing protein 1A OS=Mus musculus GN=Rprd1a PE=1 SV=1 - [RPR1A_MOUSE]	15.38	1	2	2	2	312	35.6786	7.57666
P63325	40S ribosomal protein S10 OS=Mus musculus GN=Rps10 PE=1 SV=1 - [RS10_MOUSE]	14.55	1	1	1	1	165	18.9038	10.1548
P60122	RuvB-like 1 OS=Mus musculus GN=Ruvbl1 PE=1 SV=1 - [RUVB1_MOUSE]	7.89	1	3	3	3	456	50.1823	6.41748
Q99LB7	Sarcosine dehydrogenase, mitochondrial OS=Mus musculus GN=Sardh PE=1 SV=1 - [SARDH_MOUSE]	1.52	1	1	1	3	919	101.618	6.7417
Q6PGE7	Sodium-dependent proline transporter OS=Mus musculus GN=Slc6a7 PE=1 SV=1 - [SC6A7_MOUSE]	4.4	1	1	1	3	637	71.0186	6.60986
P17563	Selenium-binding protein 1 OS=Mus musculus GN=Selenbp1 PE=1 SV=2 - [SBP1_MOUSE]	24.36	7	9	9	15	472	52.4804	6.29053
Q80Z38	SH3 and multiple ankyrin repeat domains protein 2 OS=Mus musculus GN=Shank2 PE=1 SV=2 - [SHAN2_MOUSE]	15.51	3	15	15	39	1476	158.871	7.18115
Q9DB05	Alpha-soluble NSF attachment protein OS=Mus musculus GN=Napa PE=1 SV=1 - [SNAA_MOUSE]	19.32	1	3	4	6	295	33.1682	5.45264
Q9R0P4	Small acidic protein OS=Mus musculus GN=Smap PE=1 SV=1 - [SMAP_MOUSE]	34.25	5	6	6	10	181	20.0341	4.81787
Q8BH69	Selenide, water dikinase 1 OS=Mus musculus GN=Sephs1 PE=1 SV=1 - [SPS1_MOUSE]	12.24	1	3	3	4	392	42.8787	5.97314
Q6P069	Sorcin OS=Mus musculus GN=Sri PE=1 SV=1 - [SORCN_MOUSE]	23.23	1	4	4	6	198	21.6133	5.59229
Q8BGQ7	Alanine--tRNA ligase, cytoplasmic OS=Mus musculus GN=Aars PE=1 SV=1 - [SYAC_MOUSE]	11.36	1	9	9	19	968	106.841	5.66846
O55106	Striatin OS=Mus musculus GN=Strn PE=1 SV=2 - [STRN_MOUSE]	17.56	3	8	8	24	780	85.9127	5.2749
Q9ER72	Cysteine--tRNA ligase, cytoplasmic OS=Mus musculus GN=Cars PE=1 SV=2 - [SYCC_MOUSE]	2.89	1	2	2	3	831	94.8	6.75635
Q62277	Synaptophysin OS=Mus musculus GN=Syp PE=1 SV=2 - [SYPH_MOUSE]	5.1	1	2	2	9	314	34.0025	4.94482
Q9JJL8	Serine--tRNA ligase, mitochondrial OS=Mus musculus GN=Sars2 PE=1 SV=2 - [SYSM_MOUSE]	6.56	1	2	2	4	518	58.2798	7.89893
Q8K0H5	Transcription initiation factor TFIID subunit 10 OS=Mus musculus GN=Taf10 PE=1 SV=1 - [TAF10_MOUSE]	11.47	1	1	1	1	218	21.8269	6.55127
P80313	T-complex protein 1 subunit eta OS=Mus musculus GN=Cct7 PE=1 SV=1 - [TCPH_MOUSE]	21.69	2	8	8	22	544	59.6141	7.84033
Q62318	Transcription intermediary factor 1-beta OS=Mus musculus GN=Trim28 PE=1 SV=3 - [TIF1B_MOUSE]	16.31	1	7	7	29	834	88.7905	5.77002
P42932	T-complex protein 1 subunit theta OS=Mus musculus GN=Cct8 PE=1 SV=3 - [TCPQ_MOUSE]	31.39	6	12	12	22	548	59.5175	5.61768
O89023	Tripeptidyl-peptidase 1 OS=Mus musculus GN=Tpp1 PE=1 SV=2 - [TPP1_MOUSE]	8.72	1	4	4	6	562	61.3038	6.56592
Q9JMH6	Thioredoxin reductase 1, cytoplasmic OS=Mus musculus GN=Txnrd1 PE=1 SV=3 - [TRXR1_MOUSE]	13.05	2	4	5	14	613	67.042	7.44482
Q3TW96	UDP-N-acetylhexosamine pyrophosphorylase-like protein 1 OS=Mus musculus GN=Uap1l1 PE=1 SV=1 - [UAP1L_MOUSE]	10.26	1	3	3	10	507	56.5777	5.42725
B1AY13	Ubiquitin carboxyl-terminal hydrolase 24 OS=Mus musculus GN=Usp24 PE=1 SV=1 - [UBP24_MOUSE]	0.99	2	1	1	1	2617	293.814	6.18896
Q6ZPJ3	(E3-independent) E2 ubiquitin-conjugating enzyme UBE2O OS=Mus musculus GN=Ube2o PE=1 SV=3 - [UBE2O_MOUSE]	4.43	1	3	3	12	1288	140.746	5.05908
Q8VDJ3	Vigilin OS=Mus musculus GN=Hdlbp PE=1 SV=1 - [VIGLN_MOUSE]	6.23	2	4	4	5	1268	141.655	6.87354
Q9EPK7	Exportin-7 OS=Mus musculus GN=Xpo7 PE=1 SV=3 - [XPO7_MOUSE]	3.31	2	2	2	2	1087	123.731	6.37939
O88342	WD repeat-containing protein 1 OS=Mus musculus GN=Wdr1 PE=1 SV=3 - [WDR1_MOUSE]	32.84	2	15	15	42	606	66.365	6.59521
A0A0R4J169	Leucine-rich repeat flightless-interacting protein 2 OS=Mus musculus GN=Lrrfip2 PE=1 SV=1 - [A0A0R4J169_MOUSE]	8.25	8	2	2	4	400	45.4971	5.59229
E9Q6Q2	Serine/threonine-protein kinase WNK2 OS=Mus musculus GN=Wnk2 PE=1 SV=1 - [E9Q6Q2_MOUSE]	7.43	10	6	6	12	1991	210.986	5.78271
A0A1B0GTA0	Fucose mutarotase (Fragment) OS=Mus musculus GN=Fuom PE=1 SV=1 - [A0A1B0GTA0_MOUSE]	21.82	4	1	1	1	55	5.71273	5.08447
F8WI80	Adenosine deaminase domain-containing protein 1 OS=Mus musculus GN=Adad1 PE=1 SV=1 - [F8WI80_MOUSE]	2.74	2	1	1	1	548	60.238	8.55811
H3BJ97	Tubulointerstitial nephritis antigen-like OS=Mus musculus GN=Tinagl1 PE=1 SV=1 - [H3BJ97_MOUSE]	5.29	2	1	1	2	435	49.2444	7.15186
E9Q9A3	Clathrin coat assembly protein AP180 OS=Mus musculus GN=Snap91 PE=1 SV=2 - [E9Q9A3_MOUSE]	7.16	7	3	4	13	838	86.0019	5.07178
E9Q912	Protein Rap1gds1 OS=Mus musculus GN=Rap1gds1 PE=1 SV=1 - [E9Q912_MOUSE]	8.9	4	5	5	8	607	66.0343	5.35107
E9PUD2	Dynamin-1-like protein OS=Mus musculus GN=Dnm1l PE=1 SV=1 - [E9PUD2_MOUSE]	15.45	1	1	8	10	712	79.4829	7.07861
A2AIS0	Voltage-dependent N-type calcium channel subunit alpha OS=Mus musculus GN=Cacna1b PE=1 SV=1 - [A2AIS0_MOUSE]	1.27	6	1	2	2	2288	256.908	8.52881
E0CXZ1	FSD1-like protein (Fragment) OS=Mus musculus GN=Fsd1l PE=1 SV=2 - [E0CXZ1_MOUSE]	12.58	4	4	4	4	493	55.3045	6.25244
F6U6U5	Serine/threonine-protein kinase SIK3 (Fragment) OS=Mus musculus GN=Sik3 PE=1 SV=1 - [F6U6U5_MOUSE]	1.4	4	1	1	1	1214	134.791	6.81494
Z4YK85	Agrin OS=Mus musculus GN=Agrn PE=1 SV=1 - [Z4YK85_MOUSE]	2.02	4	2	2	2	1927	204.82	6.31592
E9QLQ9	Adenomatous polyposis coli protein OS=Mus musculus GN=Apc PE=1 SV=1 - [E9QLQ9_MOUSE]	0.39	3	1	1	1	2808	307.278	7.6499
Q3UJB0	Protein Sf3b2 OS=Mus musculus GN=Sf3b2 PE=1 SV=1 - [Q3UJB0_MOUSE]	10.93	1	5	5	8	878	98.1368	5.61768
Q9CZN7	Serine hydroxymethyltransferase OS=Mus musculus GN=Shmt2 PE=1 SV=1 - [Q9CZN7_MOUSE]	7.34	1	3	3	8	504	55.7236	8.47021
A2AEG6	Glycoprotein m6b, isoform CRA_g OS=Mus musculus GN=Gpm6b PE=1 SV=1 - [A2AEG6_MOUSE]	6.71	2	3	3	6	328	36.1727	6.13818
A0A0R4IZX6	AP-1 complex subunit mu-2 OS=Mus musculus GN=Ap1m2 PE=1 SV=1 - [A0A0R4IZX6_MOUSE]	3.31	4	1	1	1	423	48.1202	7.54736
Q3U3J1	2-oxoisovalerate dehydrogenase subunit alpha, mitochondrial OS=Mus musculus GN=Bckdha PE=1 SV=1 - [Q3U3J1_MOUSE]	7.4	2	3	3	11	446	50.7412	8.06006
Q6F5F2	Protein Sirpb1a OS=Mus musculus GN=SIRP-beta PE=2 SV=1 - [Q6F5F2_MOUSE]	5.63	5	1	2	5	391	43.4639	7.98682
A2AC16	Dicarbonyl L-xylulose reductase, isoform CRA_a OS=Mus musculus GN=Dcxr PE=1 SV=1 - [A2AC16_MOUSE]	11.44	2	2	2	3	236	24.9741	6.55127
A2AC13	RAS-related C3 botulinum substrate 3, isoform CRA_a (Fragment) OS=Mus musculus GN=Rac3 PE=1 SV=1 - [A2AC13_MOUSE]	15.14	3	2	4	19	185	20.7217	8.22119
Q91V55	40S ribosomal protein S5 OS=Mus musculus GN=Rps5 PE=1 SV=1 - [Q91V55_MOUSE]	18.14	4	2	2	2	204	22.8621	9.71533
Q5U4C5	Importin-4 OS=Mus musculus GN=Ipo4 PE=1 SV=1 - [Q5U4C5_MOUSE]	2.08	2	1	1	4	818	90.6667	5.04639
A0A0R4IZW8	Calpain small subunit 1 OS=Mus musculus GN=Capns1 PE=1 SV=1 - [A0A0R4IZW8_MOUSE]	19.03	1	1	1	1	268	28.3879	5.63037
D3Z3A0	MCG126099, isoform CRA_b OS=Mus musculus GN=Ppp1r2 PE=1 SV=1 - [D3Z3A0_MOUSE]	37.95	2	4	4	7	195	21.9055	4.729
G3UY29	MCG22989, isoform CRA_a OS=Mus musculus GN=Rab11b PE=4 SV=1 - [G3UY29_MOUSE]	16.11	6	2	2	2	149	16.9138	6.96143
F7CVL0	Histone-lysine N-methyltransferase, H3 lysine-79 specific (Fragment) OS=Mus musculus GN=Dot1l PE=1 SV=1 - [F7CVL0_MOUSE]	1.25	2	1	1	1	1202	128.636	9.71533
E0CZ84	Cerebral cavernous malformations protein 2 homolog (Fragment) OS=Mus musculus GN=Ccm2 PE=1 SV=1 - [E0CZ84_MOUSE]	10.62	4	1	1	1	113	12.4625	7.12256
B1AXY0	DnaJ homolog subfamily A member 1 (Fragment) OS=Mus musculus GN=Dnaja1 PE=1 SV=1 - [B1AXY0_MOUSE]	22.12	4	3	3	4	208	23.1587	9.23193
E9Q9F3	Protein Cald1 (Fragment) OS=Mus musculus GN=Cald1 PE=1 SV=1 - [E9Q9F3_MOUSE]	5.53	7	1	1	1	253	29.9779	5.16064
A2ARF0	Multivesicular body subunit 12B (Fragment) OS=Mus musculus GN=Mvb12b PE=1 SV=1 - [A2ARF0_MOUSE]	11.64	2	1	1	1	189	20.9297	7.85498
D3Z2J6	Thioredoxin-related transmembrane protein 2 OS=Mus musculus GN=Tmx2 PE=1 SV=1 - [D3Z2J6_MOUSE]	8.95	2	2	2	3	257	29.5722	8.71924
F7CD74	Peripheral-type benzodiazepine receptor-associated protein 1 (Fragment) OS=Mus musculus GN=Bzrap1 PE=4 SV=1 - [F7CD74_MOUSE]	6.77	4	1	1	2	251	26.7787	4.65283
D3YYK8	Microtubule-associated protein RP/EB family member 2 (Fragment) OS=Mus musculus GN=Mapre2 PE=1 SV=1 - [D3YYK8_MOUSE]	19.62	4	4	4	5	260	29.4067	6.44287
J3QMT0	Heterogeneous nuclear ribonucleoprotein F (Fragment) OS=Mus musculus GN=Hnrnpf PE=1 SV=8 - [J3QMT0_MOUSE]	14.42	3	2	2	3	208	23.2936	5.63037
D3YZR1	Protein TSSC4 (Fragment) OS=Mus musculus GN=Tssc4 PE=1 SV=1 - [D3YZR1_MOUSE]	10.6	2	1	1	1	217	23.2891	4.64014
G3UXG7	Casein kinase II subunit beta OS=Mus musculus GN=Csnk2b PE=1 SV=1 - [G3UXG7_MOUSE]	33.54	6	5	5	26	164	18.9133	6.85889
F6S054	MTSS1-like protein (Fragment) OS=Mus musculus GN=Mtss1l PE=1 SV=1 - [F6S054_MOUSE]	6.92	2	1	1	1	289	31.6076	8.48486
E9Q6B6	C-Jun-amino-terminal kinase-interacting protein 3 OS=Mus musculus GN=Mapk8ip3 PE=1 SV=1 - [E9Q6B6_MOUSE]	4.08	7	2	4	7	1300	143.356	5.41455
A0A140LHI9	Sodium- and chloride-dependent glycine transporter 2 OS=Mus musculus GN=Slc6a5 PE=1 SV=1 - [A0A140LHI9_MOUSE]	30.94	3	3	3	8	181	18.3211	6.91748
A2AM66	SH2 domain-containing protein 5 (Fragment) OS=Mus musculus GN=Sh2d5 PE=1 SV=1 - [A2AM66_MOUSE]	6.15	3	1	1	1	195	21.4062	9.1001
A0A0G2JDV8	Calponin OS=Mus musculus GN=Cnn3 PE=1 SV=1 - [A0A0G2JDV8_MOUSE]	8.1	3	2	2	4	284	31.3753	6.16357
D3YU12	NmrA-like family domain-containing protein 1 OS=Mus musculus GN=Nmral1 PE=1 SV=1 - [D3YU12_MOUSE]	20.4	3	5	5	9	299	33.0609	6.80029
P59999	Actin-related protein 2/3 complex subunit 4 OS=Mus musculus GN=Arpc4 PE=1 SV=3 - [ARPC4_MOUSE]	6.55	1	1	1	1	168	19.6543	8.42627
Q91X97	Neurocalcin-delta OS=Mus musculus GN=Ncald PE=1 SV=4 - [NCALD_MOUSE]	10.36	2	1	2	3	193	22.2309	5.35107
P62073	Mitochondrial import inner membrane translocase subunit Tim10 OS=Mus musculus GN=Timm10 PE=1 SV=1 - [TIM10_MOUSE]	52.22	1	8	8	16	90	10.3259	6.29053
P62264	40S ribosomal protein S14 OS=Mus musculus GN=Rps14 PE=1 SV=3 - [RS14_MOUSE]	45.03	3	7	7	18	151	16.2625	10.0522
Q80SW1	Putative adenosylhomocysteinase 2 OS=Mus musculus GN=Ahcyl1 PE=1 SV=1 - [SAHH2_MOUSE]	24.15	4	5	10	20	530	58.9134	6.88818
P62806	Histone H4 OS=Mus musculus GN=Hist1h4a PE=1 SV=2 - [H4_MOUSE]	33.01	1	5	5	6	103	11.3604	11.356
P84075	Neuron-specific calcium-binding protein hippocalcin OS=Mus musculus GN=Hpca PE=1 SV=2 - [HPCA_MOUSE]	15.03	4	2	3	6	193	22.413	4.97021
Q8VHQ9	Acyl-coenzyme A thioesterase 11 OS=Mus musculus GN=Acot11 PE=1 SV=1 - [ACO11_MOUSE]	2.53	2	1	1	3	594	67.3117	6.80029
P28271	Cytoplasmic aconitate hydratase OS=Mus musculus GN=Aco1 PE=1 SV=3 - [ACOC_MOUSE]	5.4	1	2	2	3	889	98.0635	7.50342
Q8VCW8	Acyl-CoA synthetase family member 2, mitochondrial OS=Mus musculus GN=Acsf2 PE=1 SV=1 - [ACSF2_MOUSE]	16.59	1	6	6	12	615	67.907	8.17725
Q00897	Alpha-1-antitrypsin 1-4 OS=Mus musculus GN=Serpina1d PE=1 SV=1 - [A1AT4_MOUSE]	10.17	1	1	3	21	413	45.9694	5.43994
Q9JII6	Alcohol dehydrogenase [NADP(+)] OS=Mus musculus GN=Akr1a1 PE=1 SV=3 - [AK1A1_MOUSE]	32	2	7	7	25	325	36.5639	7.38623
Q3UHD9	Arf-GAP with GTPase, ANK repeat and PH domain-containing protein 2 OS=Mus musculus GN=Agap2 PE=1 SV=1 - [AGAP2_MOUSE]	7.17	1	5	5	10	1186	124.434	9.89111
Q80TR1	Adhesion G protein-coupled receptor L1 OS=Mus musculus GN=Adgrl1 PE=1 SV=2 - [AGRL1_MOUSE]	6.14	6	7	7	17	1466	161.583	6.48096
Q9ES28	Rho guanine nucleotide exchange factor 7 OS=Mus musculus GN=Arhgef7 PE=1 SV=2 - [ARHG7_MOUSE]	7.66	8	6	6	6	862	96.9951	6.80029
Q5SQY2	Biorientation of chromosomes in cell division protein 1 OS=Mus musculus GN=Bod1 PE=3 SV=1 - [BOD1_MOUSE]	9.25	2	1	1	1	173	18.3523	5.89697
E9Q6B2	Coiled-coil domain-containing protein 85C OS=Mus musculus GN=Ccdc85c PE=1 SV=1 - [CC85C_MOUSE]	8.33	1	2	2	3	420	45.3062	6.96143
P62812	Gamma-aminobutyric acid receptor subunit alpha-1 OS=Mus musculus GN=Gabra1 PE=1 SV=1 - [GBRA1_MOUSE]	5.93	1	3	3	3	455	51.7207	9.30518
Q7TPM6	Fibronectin type III and SPRY domain-containing protein 1 OS=Mus musculus GN=Fsd1 PE=1 SV=1 - [FSD1_MOUSE]	6.25	1	3	3	10	496	55.4898	6.66846
O09131	Glutathione S-transferase omega-1 OS=Mus musculus GN=Gsto1 PE=1 SV=2 - [GSTO1_MOUSE]	28.75	3	5	5	13	240	27.4799	7.35693
Q3U5Q7	UMP-CMP kinase 2, mitochondrial OS=Mus musculus GN=Cmpk2 PE=1 SV=2 - [CMPK2_MOUSE]	17.23	1	6	6	14	447	50.0047	7.26904
Q8CJ40	Rootletin OS=Mus musculus GN=Crocc PE=1 SV=2 - [CROCC_MOUSE]	1.1	1	1	2	2	2009	226.809	5.5542
Q91XD7	Cysteine-rich with EGF-like domain protein 1 OS=Mus musculus GN=Creld1 PE=1 SV=1 - [CREL1_MOUSE]	5.48	1	2	2	3	420	45.687	5.021
Q8BGD5	Carnitine O-palmitoyltransferase 1, brain isoform OS=Mus musculus GN=Cpt1c PE=1 SV=1 - [CPT1C_MOUSE]	3.88	1	1	1	1	798	89.9724	7.48877
Q9DAR7	m7GpppX diphosphatase OS=Mus musculus GN=Dcps PE=1 SV=1 - [DCPS_MOUSE]	7.1	1	2	2	2	338	38.9643	6.48096
P61148	Fibroblast growth factor 1 OS=Mus musculus GN=Fgf1 PE=1 SV=1 - [FGF1_MOUSE]	15.48	5	2	2	2	155	17.4067	7.02002
P26040	Ezrin OS=Mus musculus GN=Ezr PE=1 SV=3 - [EZRI_MOUSE]	10.24	1	2	5	8	586	69.3636	6.1001
P97447	Four and a half LIM domains protein 1 OS=Mus musculus GN=Fhl1 PE=1 SV=3 - [FHL1_MOUSE]	15.36	5	3	3	6	280	31.8668	8.36768
Q8R0H9	ADP-ribosylation factor-binding protein GGA1 OS=Mus musculus GN=Gga1 PE=1 SV=1 - [GGA1_MOUSE]	7.09	1	2	2	6	635	69.9278	5.2749
Q91VF2	Histamine N-methyltransferase OS=Mus musculus GN=Hnmt PE=1 SV=1 - [HNMT_MOUSE]	8.47	1	1	1	1	295	33.6429	5.05908
Q63844	Mitogen-activated protein kinase 3 OS=Mus musculus GN=Mapk3 PE=1 SV=5 - [MK03_MOUSE]	27.37	18	1	8	11	380	43.0391	6.60986
Q8R404	MICOS complex subunit MIC13 OS=Mus musculus GN=Mic13 PE=1 SV=1 - [MIC13_MOUSE]	18.49	1	1	1	1	119	13.3648	8.63135
Q62422	Osteoclast-stimulating factor 1 OS=Mus musculus GN=Ostf1 PE=1 SV=2 - [OSTF1_MOUSE]	18.6	1	3	3	3	215	23.7679	5.68115
Q920P5	Adenylate kinase isoenzyme 5 OS=Mus musculus GN=Ak5 PE=1 SV=2 - [KAD5_MOUSE]	16.55	2	6	6	17	562	63.283	5.2876
P16388	Potassium voltage-gated channel subfamily A member 1 OS=Mus musculus GN=Kcna1 PE=1 SV=1 - [KCNA1_MOUSE]	7.07	1	2	2	4	495	56.3734	5.13525
Q9JM63	ATP-sensitive inward rectifier potassium channel 10 OS=Mus musculus GN=Kcnj10 PE=1 SV=1 - [KCJ10_MOUSE]	8.71	1	2	2	4	379	42.4053	8.29443
Q9WVL0	Maleylacetoacetate isomerase OS=Mus musculus GN=Gstz1 PE=1 SV=1 - [MAAI_MOUSE]	14.35	1	2	2	6	216	24.2598	7.85498
P59759	MKL/myocardin-like protein 2 OS=Mus musculus GN=Mkl2 PE=1 SV=1 - [MKL2_MOUSE]	4.17	3	2	2	2	1080	117.474	6.16357
Q91W39	Nuclear receptor coactivator 5 OS=Mus musculus GN=Ncoa5 PE=1 SV=1 - [NCOA5_MOUSE]	6.04	3	2	2	2	579	65.2797	9.81787
O35683	NADH dehydrogenase [ubiquinone] 1 alpha subcomplex subunit 1 OS=Mus musculus GN=Ndufa1 PE=1 SV=1 - [NDUA1_MOUSE]	38.57	1	3	3	4	70	8.13323	9.48096
Q9CR95	Adaptin ear-binding coat-associated protein 1 OS=Mus musculus GN=Necap1 PE=1 SV=2 - [NECP1_MOUSE]	14.55	1	3	3	4	275	29.6211	6.37939
P12382	ATP-dependent 6-phosphofructokinase, liver type OS=Mus musculus GN=Pfkl PE=1 SV=4 - [PFKAL_MOUSE]	12.69	1	6	8	18	780	85.3054	7.1665
O70172	Phosphatidylinositol 5-phosphate 4-kinase type-2 alpha OS=Mus musculus GN=Pip4k2a PE=1 SV=1 - [PI42A_MOUSE]	7.9	2	2	3	12	405	46.1225	6.99072
Q80XI4	Phosphatidylinositol 5-phosphate 4-kinase type-2 beta OS=Mus musculus GN=Pip4k2b PE=1 SV=1 - [PI42B_MOUSE]	14.9	1	4	5	17	416	47.2888	7.32764
Q8CGA0	Protein phosphatase 1F OS=Mus musculus GN=Ppm1f PE=1 SV=1 - [PPM1F_MOUSE]	2.21	1	1	1	1	452	49.58	5.30029
Q9EPX2	Papilin OS=Mus musculus GN=Papln PE=2 SV=2 - [PPN_MOUSE]	2.73	2	1	1	1	1280	138.816	7.75244
Q9JIG8	PRA1 family protein 2 OS=Mus musculus GN=Praf2 PE=1 SV=1 - [PRAF2_MOUSE]	10.67	2	1	1	2	178	19.4657	9.59814
P70195	Proteasome subunit beta type-7 OS=Mus musculus GN=Psmb7 PE=1 SV=1 - [PSB7_MOUSE]	11.19	1	1	1	4	277	29.8723	7.98682
Q61838	Pregnancy zone protein OS=Mus musculus GN=Pzp PE=1 SV=3 - [PZP_MOUSE]	6.22	1	5	5	16	1495	165.748	6.68311
Q8BJU0	Small glutamine-rich tetratricopeptide repeat-containing protein alpha OS=Mus musculus GN=Sgta PE=1 SV=2 - [SGTA_MOUSE]	13.97	1	5	5	16	315	34.3009	5.05908
O54941	SWI/SNF-related matrix-associated actin-dependent regulator of chromatin subfamily E member 1 OS=Mus musculus GN=Smarce1 PE=1 SV=1 - [SMCE1_MOUSE]	7.3	1	2	2	4	411	46.6096	4.88135
P70390	Short stature homeobox protein 2 OS=Mus musculus GN=Shox2 PE=2 SV=1 - [SHOX2_MOUSE]	11.78	1	2	2	2	331	34.8836	8.82178
Q9D554	Splicing factor 3A subunit 3 OS=Mus musculus GN=Sf3a3 PE=1 SV=2 - [SF3A3_MOUSE]	4.99	1	1	1	1	501	58.8052	5.33838
Q8K2C6	NAD-dependent protein deacylase sirtuin-5, mitochondrial OS=Mus musculus GN=Sirt5 PE=1 SV=1 - [SIR5_MOUSE]	20.65	1	4	4	5	310	34.1122	8.52881
Q8BK67	Protein RCC2 OS=Mus musculus GN=Rcc2 PE=1 SV=1 - [RCC2_MOUSE]	2.5	1	1	1	1	520	55.9481	8.71924
P99027	60S acidic ribosomal protein P2 OS=Mus musculus GN=Rplp2 PE=1 SV=3 - [RLA2_MOUSE]	35.65	1	6	6	20	115	11.6438	4.53857
P62849	40S ribosomal protein S24 OS=Mus musculus GN=Rps24 PE=1 SV=1 - [RS24_MOUSE]	9.02	1	1	1	1	133	15.4134	10.7847
Q924T2	28S ribosomal protein S2, mitochondrial OS=Mus musculus GN=Mrps2 PE=1 SV=1 - [RT02_MOUSE]	7.22	1	1	1	2	291	32.2928	9.14404
Q9R1T4	Septin-6 OS=Mus musculus GN=Sept6 PE=1 SV=4 - [SEPT6_MOUSE]	22.12	2	6	8	13	434	49.5882	6.43018
Q99JR1	Sideroflexin-1 OS=Mus musculus GN=Sfxn1 PE=1 SV=3 - [SFXN1_MOUSE]	17.39	1	2	4	19	322	35.6263	9.23193
Q3UTJ2	Sorbin and SH3 domain-containing protein 2 OS=Mus musculus GN=Sorbs2 PE=1 SV=2 - [SRBS2_MOUSE]	4.58	11	3	3	7	1180	132.266	8.52881
Q9WUM5	Succinate--CoA ligase [ADP/GDP-forming] subunit alpha, mitochondrial OS=Mus musculus GN=Suclg1 PE=1 SV=4 - [SUCA_MOUSE]	27.75	2	10	10	48	346	36.132	9.39307
O70439	Syntaxin-7 OS=Mus musculus GN=Stx7 PE=1 SV=3 - [STX7_MOUSE]	17.62	2	3	3	4	261	29.8023	5.78271
Q99MN1	Lysine--tRNA ligase OS=Mus musculus GN=Kars PE=1 SV=1 - [SYK_MOUSE]	2.69	2	1	1	1	595	67.7965	5.93506
P10639	Thioredoxin OS=Mus musculus GN=Txn PE=1 SV=3 - [THIO_MOUSE]	54.29	1	4	4	7	105	11.6676	4.91943
Q9WVM6	Tolloid-like protein 2 OS=Mus musculus GN=Tll2 PE=1 SV=1 - [TLL2_MOUSE]	0.99	1	1	1	5	1012	113.18	5.96045
Q6IRU2	Tropomyosin alpha-4 chain OS=Mus musculus GN=Tpm4 PE=1 SV=3 - [TPM4_MOUSE]	18.95	1	3	3	3	248	28.4504	4.67822
P62075	Mitochondrial import inner membrane translocase subunit Tim13 OS=Mus musculus GN=Timm13 PE=1 SV=1 - [TIM13_MOUSE]	49.47	1	4	4	12	95	10.4509	8.17725
Q9QYA2	Mitochondrial import receptor subunit TOM40 homolog OS=Mus musculus GN=Tomm40 PE=1 SV=3 - [TOM40_MOUSE]	13.85	2	2	2	2	361	37.8711	7.73779
P07309	Transthyretin OS=Mus musculus GN=Ttr PE=1 SV=1 - [TTHY_MOUSE]	26.53	1	2	2	2	147	15.766	6.16357
P83741	Serine/threonine-protein kinase WNK1 OS=Mus musculus GN=Wnk1 PE=1 SV=2 - [WNK1_MOUSE]	0.42	1	1	1	1	2377	250.779	6.43018
Q8BZ94	Zinc finger matrin-type protein 4 OS=Mus musculus GN=Zmat4 PE=2 SV=1 - [ZMAT4_MOUSE]	7.42	1	1	1	1	229	25.6549	9.33447
D3YU02	Serine/threonine-protein kinase D3 OS=Mus musculus GN=Prkd3 PE=1 SV=1 - [D3YU02_MOUSE]	12.12	4	1	1	1	297	33.6765	7.1665
A0A0G2JDQ1	Myocyte-specific enhancer factor 2C OS=Mus musculus GN=Mef2c PE=1 SV=1 - [A0A0G2JDQ1_MOUSE]	9.75	16	4	4	20	400	43.1248	8.60205
D3YZJ1	Sequestosome-1 OS=Mus musculus GN=Sqstm1 PE=1 SV=1 - [D3YZJ1_MOUSE]	5.24	2	1	1	2	382	41.6564	7.72314
D3YTY9	Kininogen-1 OS=Mus musculus GN=Kng1 PE=1 SV=1 - [D3YTY9_MOUSE]	8.33	4	3	3	5	480	53.1709	5.10986
F8WGT1	Adenosylhomocysteinase OS=Mus musculus GN=Ahcyl2 PE=1 SV=1 - [F8WGT1_MOUSE]	13.24	8	2	7	37	612	66.7285	7.35693
A0A0G2JGW6	Cyclin-dependent kinase-like 5 OS=Mus musculus GN=Cdkl5 PE=1 SV=1 - [A0A0G2JGW6_MOUSE]	4.06	4	2	2	2	960	107.506	9.53955
A0A0R4J285	Acetylserotonin O-methyltransferase OS=Mus musculus GN=Asmt PE=3 SV=1 - [A0A0R4J285_MOUSE]	6.2	2	1	1	1	387	40.7469	9.37842
D3YZU4	SH3 and multiple ankyrin repeat domains protein 1 OS=Mus musculus GN=Shank1 PE=1 SV=1 - [D3YZU4_MOUSE]	13.85	3	12	12	28	2159	225.212	8.14795
D3Z4J9	Echinoderm microtubule-associated protein-like 1 OS=Mus musculus GN=Eml1 PE=1 SV=1 - [D3Z4J9_MOUSE]	4.13	3	2	2	2	800	88.2723	7.94287
B1AR28	Very long-chain-specific acyl-CoA dehydrogenase, mitochondrial OS=Mus musculus GN=Acadvl PE=1 SV=1 - [B1AR28_MOUSE]	12.15	2	5	5	10	634	68.5075	8.74854
A2BI12	PC4 and SFRS1-interacting protein OS=Mus musculus GN=Psip1 PE=1 SV=1 - [A2BI12_MOUSE]	14.37	3	5	5	9	327	36.9459	9.23193
A2A934	PR domain zinc finger protein 16 OS=Mus musculus GN=Prdm16 PE=1 SV=1 - [A2A934_MOUSE]	0.76	5	1	1	8	1177	130.258	6.26514
F6SG45	Fasciculation and elongation protein zeta-1 (Fragment) OS=Mus musculus GN=Fez1 PE=1 SV=1 - [F6SG45_MOUSE]	19.78	4	1	1	1	91	10.581	4.28467
Q5U425	Protein FAM220A OS=Mus musculus GN=Fam220a PE=2 SV=1 - [Q5U425_MOUSE]	16.18	2	1	1	1	68	7.75222	10.8726
D5MCW4	Protein CutA OS=Mus musculus GN=Cuta PE=1 SV=1 - [D5MCW4_MOUSE]	20.78	2	2	2	6	154	16.4426	6.29053
Q3UGN9	Signal transducing adapter molecule 1 OS=Mus musculus GN=Stam PE=1 SV=1 - [Q3UGN9_MOUSE]	9.52	3	4	4	13	462	51.1122	4.86865
Q80ZP8	Armet protein OS=Mus musculus GN=Manf PE=1 SV=1 - [Q80ZP8_MOUSE]	23.64	5	3	3	8	165	18.9998	8.1333
A0A0N4SVQ1	Cytochrome c oxidase subunit NDUFA4 OS=Mus musculus GN=Ndufa4 PE=1 SV=1 - [A0A0N4SVQ1_MOUSE]	79.59	2	6	6	10	49	5.87291	8.47021
Q78TU8	Family with sequence similarity 107, member A OS=Mus musculus GN=Fam107a PE=1 SV=1 - [Q78TU8_MOUSE]	15.97	1	2	2	3	144	17.4993	9.74463
Q8C605	ATP-dependent 6-phosphofructokinase OS=Mus musculus GN=Pfkp PE=1 SV=1 - [Q8C605_MOUSE]	15.05	3	9	11	35	784	85.4923	6.88818
Q6YJU1	Fetuin-B OS=Mus musculus GN=Fetub PE=1 SV=1 - [Q6YJU1_MOUSE]	3.57	2	1	1	1	308	33.8579	6.53662
Q8CAD1	Ras-binding protein DA-Raf OS=Mus musculus GN=Araf PE=1 SV=1 - [Q8CAD1_MOUSE]	18.28	4	2	2	4	186	20.8715	8.47021
A0A087WPM2	MCG5343 OS=Mus musculus GN=Ppfia4 PE=1 SV=1 - [A0A087WPM2_MOUSE]	5.49	3	4	4	5	1184	133.567	6.30322
D3Z6H3	Dynactin 6, isoform CRA_b OS=Mus musculus GN=Dctn6 PE=1 SV=1 - [D3Z6H3_MOUSE]	34.59	4	3	3	10	185	20.0283	6.37939
F6SWQ9	Ephexin-1 (Fragment) OS=Mus musculus GN=Ngef PE=1 SV=1 - [F6SWQ9_MOUSE]	8.98	3	1	1	1	245	28.3629	8.99756
D3YVH4	Splicing factor 1 (Fragment) OS=Mus musculus GN=Sf1 PE=1 SV=1 - [D3YVH4_MOUSE]	23.6	5	4	4	6	267	30.1066	8.38232
F6WZH1	Methyl-CpG-binding domain protein 3 (Fragment) OS=Mus musculus GN=Mbd3 PE=1 SV=1 - [F6WZH1_MOUSE]	8.11	4	1	1	2	185	20.5423	4.66553
D6RE33	Enhancer of mRNA-decapping protein 4 OS=Mus musculus GN=Edc4 PE=1 SV=1 - [D6RE33_MOUSE]	1.97	4	1	1	1	1318	141.867	5.5415
E9Q2S9	Coiled-coil domain-containing protein 43 OS=Mus musculus GN=Ccdc43 PE=1 SV=1 - [E9Q2S9_MOUSE]	12.16	2	2	2	3	222	25.02	5.021
F7BNZ5	Breast carcinoma-amplified sequence 1 homolog (Fragment) OS=Mus musculus GN=Bcas1 PE=1 SV=1 - [F7BNZ5_MOUSE]	8.71	4	4	4	28	379	40.5124	9.02686
A0A0G2JF64	Methylcrotonoyl-CoA carboxylase subunit alpha, mitochondrial (Fragment) OS=Mus musculus GN=Mccc1 PE=1 SV=1 - [A0A0G2JF64_MOUSE]	22.39	2	2	2	2	201	22.7964	5.60498
B0V2H4	V-type proton ATPase subunit G 2 OS=Mus musculus GN=Atp6v1g2 PE=1 SV=1 - [B0V2H4_MOUSE]	73.12	3	7	7	45	93	10.8805	10.2427
A0A1B0GSR7	Keratin, type I cytoskeletal 10 OS=Mus musculus GN=Krt10 PE=4 SV=1 - [A0A1B0GSR7_MOUSE]	54.64	1	1	1	1	97	9.26029	8.48486
D3YYV8	60S ribosomal protein L5 (Fragment) OS=Mus musculus GN=Rpl5 PE=1 SV=1 - [D3YYV8_MOUSE]	18.4	2	2	2	3	163	17.986	7.35693
P62892	60S ribosomal protein L39 OS=Mus musculus GN=Rpl39 PE=1 SV=2 - [RL39_MOUSE]	19.61	1	1	1	1	51	6.40265	12.5571
P63147	Ubiquitin-conjugating enzyme E2 B OS=Mus musculus GN=Ube2b PE=1 SV=1 - [UBE2B_MOUSE]	7.89	1	1	1	1	152	17.3015	5.0083
P61089	Ubiquitin-conjugating enzyme E2 N OS=Mus musculus GN=Ube2n PE=1 SV=1 - [UBE2N_MOUSE]	28.29	1	4	4	16	152	17.127	6.56592
Q99MR0	Actin-like protein 6B OS=Mus musculus GN=Actl6b PE=1 SV=1 - [ACL6B_MOUSE]	9.15	7	3	3	6	426	46.8613	5.70654
Q5XJF6	Ribosomal protein OS=Mus musculus GN=Rpl10a PE=1 SV=1 - [Q5XJF6_MOUSE]	22.58	3	4	4	6	217	24.8155	9.93506
P62137	Serine/threonine-protein phosphatase PP1-alpha catalytic subunit OS=Mus musculus GN=Ppp1ca PE=1 SV=1 - [PP1A_MOUSE]	16.67	6	1	3	4	330	37.5158	6.32861
Q3THG9	Alanyl-tRNA editing protein Aarsd1 OS=Mus musculus GN=Aarsd1 PE=1 SV=2 - [AASD1_MOUSE]	21.36	3	4	4	13	412	44.9432	6.41748
Q9Z1Q2	Protein ABHD16A OS=Mus musculus GN=Abhd16a PE=1 SV=3 - [ABHGA_MOUSE]	3.76	2	2	2	2	558	63.046	8.25049
Q00896	Alpha-1-antitrypsin 1-3 OS=Mus musculus GN=Serpina1c PE=1 SV=2 - [A1AT3_MOUSE]	4.85	4	1	2	4	412	45.7944	5.43994
Q9WTQ5	A-kinase anchor protein 12 OS=Mus musculus GN=Akap12 PE=1 SV=1 - [AKA12_MOUSE]	3.86	1	4	4	5	1684	180.586	4.43701
P28474	Alcohol dehydrogenase class-3 OS=Mus musculus GN=Adh5 PE=1 SV=3 - [ADHX_MOUSE]	11.5	1	3	3	4	374	39.5221	7.25439
Q9QZB7	Actin-related protein 10 OS=Mus musculus GN=Actr10 PE=1 SV=2 - [ARP10_MOUSE]	2.16	1	1	1	1	417	46.1783	7.60596
P09813	Apolipoprotein A-II OS=Mus musculus GN=Apoa2 PE=1 SV=2 - [APOA2_MOUSE]	14.71	1	1	1	2	102	11.3017	7.18115
Q80XK6	Autophagy-related protein 2 homolog B OS=Mus musculus GN=Atg2b PE=1 SV=3 - [ATG2B_MOUSE]	0.53	1	1	1	1	2075	231.253	5.88428
Q9CPQ8	ATP synthase subunit g, mitochondrial OS=Mus musculus GN=Atp5l PE=1 SV=1 - [ATP5L_MOUSE]	35.92	2	3	3	10	103	11.4172	9.74463
P01887	Beta-2-microglobulin OS=Mus musculus GN=B2m PE=1 SV=2 - [B2MG_MOUSE]	13.45	1	1	1	1	119	13.7699	8.44092
Q9Z0S1	3'(2'),5'-bisphosphate nucleotidase 1 OS=Mus musculus GN=Bpnt1 PE=1 SV=2 - [BPNT1_MOUSE]	40.58	4	9	9	25	308	33.1751	5.8208
Q8R464	Cell adhesion molecule 4 OS=Mus musculus GN=Cadm4 PE=1 SV=1 - [CADM4_MOUSE]	26.55	1	6	6	27	388	42.6968	6.30322
Q9DB72	BTB/POZ domain-containing protein 17 OS=Mus musculus GN=Btbd17 PE=1 SV=1 - [BTBDH_MOUSE]	7.74	1	2	2	6	478	52.5695	9.42236
Q78PG9	Coiled-coil domain-containing protein 25 OS=Mus musculus GN=Ccdc25 PE=1 SV=1 - [CCD25_MOUSE]	13.94	1	2	2	3	208	24.4642	6.94678
Q9WU84	Copper chaperone for superoxide dismutase OS=Mus musculus GN=Ccs PE=1 SV=1 - [CCS_MOUSE]	15.33	1	3	3	4	274	28.8934	6.1001
Q61735	Leukocyte surface antigen CD47 OS=Mus musculus GN=Cd47 PE=1 SV=2 - [CD47_MOUSE]	4.29	1	1	1	4	303	33.0758	8.63135
Q9JLQ0	CD2-associated protein OS=Mus musculus GN=Cd2ap PE=1 SV=3 - [CD2AP_MOUSE]	2.83	1	1	1	1	637	70.4069	6.37939
Q9CXP8	Guanine nucleotide-binding protein G(I)/G(S)/G(O) subunit gamma-10 OS=Mus musculus GN=Gng10 PE=3 SV=1 - [GBG10_MOUSE]	19.12	1	1	1	2	68	7.22477	7.85498
Q9R0N0	Galactokinase OS=Mus musculus GN=Galk1 PE=1 SV=2 - [GALK1_MOUSE]	2.81	1	1	1	1	392	42.2685	5.26221
Q8CCK0	Core histone macro-H2A.2 OS=Mus musculus GN=H2afy2 PE=1 SV=3 - [H2AW_MOUSE]	8.6	1	2	3	5	372	40.0674	9.68604
Q9WV60	Glycogen synthase kinase-3 beta OS=Mus musculus GN=Gsk3b PE=1 SV=2 - [GSK3B_MOUSE]	13.81	2	2	2	15	420	46.6809	8.77783
Q9QXT0	Protein canopy homolog 2 OS=Mus musculus GN=Cnpy2 PE=1 SV=1 - [CNPY2_MOUSE]	23.63	1	3	3	15	182	20.7543	5.07178
Q9Z0H8	CAP-Gly domain-containing linker protein 2 OS=Mus musculus GN=Clip2 PE=1 SV=2 - [CLIP2_MOUSE]	6.4	1	5	6	7	1047	115.84	6.48096
Q9D1P4	Cysteine and histidine-rich domain-containing protein 1 OS=Mus musculus GN=Chordc1 PE=1 SV=1 - [CHRD1_MOUSE]	14.5	1	3	3	3	331	37.3267	7.89893
Q921H9	Cytochrome c oxidase assembly factor 7 OS=Mus musculus GN=Coa7 PE=1 SV=1 - [COA7_MOUSE]	17.32	1	3	3	4	231	25.6001	6.29053
Q61245	Collagen alpha-1(XI) chain OS=Mus musculus GN=Col11a1 PE=1 SV=2 - [COBA1_MOUSE]	6.21	3	3	3	3	1804	180.921	5.21143
Q71M36	Chondroitin sulfate proteoglycan 5 OS=Mus musculus GN=Cspg5 PE=1 SV=2 - [CSPG5_MOUSE]	9.89	1	3	3	15	566	60.368	4.53857
Q3U1J4	DNA damage-binding protein 1 OS=Mus musculus GN=Ddb1 PE=1 SV=2 - [DDB1_MOUSE]	1.58	1	1	1	1	1140	126.772	5.26221
Q9DD18	D-tyrosyl-tRNA(Tyr) deacylase 1 OS=Mus musculus GN=Dtd1 PE=1 SV=2 - [DTD1_MOUSE]	14.83	1	2	2	17	209	23.3698	7.86963
P26883	Peptidyl-prolyl cis-trans isomerase FKBP1A OS=Mus musculus GN=Fkbp1a PE=1 SV=2 - [FKB1A_MOUSE]	28.7	2	5	5	20	108	11.9151	8.1626
Q6PGF7	Exocyst complex component 8 OS=Mus musculus GN=Exoc8 PE=1 SV=1 - [EXOC8_MOUSE]	5.73	1	3	3	5	716	80.9842	5.40186
P30416	Peptidyl-prolyl cis-trans isomerase FKBP4 OS=Mus musculus GN=Fkbp4 PE=1 SV=5 - [FKBP4_MOUSE]	21.62	3	6	6	9	458	51.5399	5.71924
P29699	Alpha-2-HS-glycoprotein OS=Mus musculus GN=Ahsg PE=1 SV=1 - [FETUA_MOUSE]	15.94	1	3	3	6	345	37.3017	6.50732
Q9CX53	Gem-associated protein 6 OS=Mus musculus GN=Gemin6 PE=1 SV=2 - [GEMI6_MOUSE]	7.83	1	1	1	2	166	18.7384	5.24951
Q9QYE6	Golgin subfamily A member 5 OS=Mus musculus GN=Golga5 PE=1 SV=2 - [GOGA5_MOUSE]	1.37	1	1	1	2	729	82.3176	6.22705
Q99PT1	Rho GDP-dissociation inhibitor 1 OS=Mus musculus GN=Arhgdia PE=1 SV=3 - [GDIR1_MOUSE]	25.98	1	4	4	15	204	23.3928	5.19873
O35668	Huntingtin-associated protein 1 OS=Mus musculus GN=Hap1 PE=1 SV=1 - [HAP1_MOUSE]	12.1	3	6	6	15	628	70.073	4.7417
Q61191	Host cell factor 1 OS=Mus musculus GN=Hcfc1 PE=1 SV=2 - [HCFC1_MOUSE]	3.47	3	4	4	4	2045	210.306	7.18115
P10518	Delta-aminolevulinic acid dehydratase OS=Mus musculus GN=Alad PE=1 SV=1 - [HEM2_MOUSE]	8.79	1	2	2	3	330	36.0003	6.78564
Q9EPL8	Importin-7 OS=Mus musculus GN=Ipo7 PE=1 SV=2 - [IPO7_MOUSE]	3.66	1	2	2	2	1038	119.41	4.81787
O55091	Protein IMPACT OS=Mus musculus GN=Impact PE=1 SV=2 - [IMPCT_MOUSE]	27.36	1	5	5	5	318	36.2532	5.04639
Q9DCZ4	MICOS complex subunit Mic26 OS=Mus musculus GN=Apoo PE=1 SV=2 - [MIC26_MOUSE]	18.18	1	4	4	11	198	22.5896	9.24658
Q6PCP5	Mitochondrial fission factor OS=Mus musculus GN=Mff PE=1 SV=1 - [MFF_MOUSE]	14.78	4	3	3	5	291	32.911	6.82959
Q8CI95	Oxysterol-binding protein-related protein 11 OS=Mus musculus GN=Osbpl11 PE=1 SV=2 - [OSB11_MOUSE]	2	2	1	1	1	751	83.5765	7.00537
Q8K010	5-oxoprolinase OS=Mus musculus GN=Oplah PE=1 SV=1 - [OPLA_MOUSE]	9.94	4	7	7	7	1288	137.525	6.27783
Q8BTS4	Nuclear pore complex protein Nup54 OS=Mus musculus GN=Nup54 PE=1 SV=1 - [NUP54_MOUSE]	1.76	1	1	1	1	510	55.6975	7.02002
P50580	Proliferation-associated protein 2G4 OS=Mus musculus GN=Pa2g4 PE=1 SV=3 - [PA2G4_MOUSE]	20.81	2	6	6	11	394	43.6712	6.85889
P62482	Voltage-gated potassium channel subunit beta-2 OS=Mus musculus GN=Kcnab2 PE=1 SV=1 - [KCAB2_MOUSE]	15.53	5	4	4	4	367	40.995	8.99756
Q9WTP7	GTP:AMP phosphotransferase AK3, mitochondrial OS=Mus musculus GN=Ak3 PE=1 SV=3 - [KAD3_MOUSE]	51.1	1	10	10	37	227	25.4105	8.83643
Q9QYH6	Melanoma-associated antigen D1 OS=Mus musculus GN=Maged1 PE=1 SV=1 - [MAGD1_MOUSE]	5.94	1	2	2	2	775	85.6167	7.50342
Q61166	Microtubule-associated protein RP/EB family member 1 OS=Mus musculus GN=Mapre1 PE=1 SV=3 - [MARE1_MOUSE]	26.87	1	5	5	9	268	29.9972	5.22412
Q8K215	LYR motif-containing protein 4 OS=Mus musculus GN=Lyrm4 PE=1 SV=1 - [LYRM4_MOUSE]	8.79	1	1	1	1	91	10.8477	10.1255
Q78J03	Methionine-R-sulfoxide reductase B2, mitochondrial OS=Mus musculus GN=Msrb2 PE=1 SV=1 - [MSRB2_MOUSE]	11.43	1	3	3	3	175	19.1445	9.05615
Q9JLB2	MAGUK p55 subfamily member 5 OS=Mus musculus GN=Mpp5 PE=1 SV=1 - [MPP5_MOUSE]	3.11	1	2	2	2	675	77.1816	6.0874
Q9DBR7	Protein phosphatase 1 regulatory subunit 12A OS=Mus musculus GN=Ppp1r12a PE=1 SV=2 - [MYPT1_MOUSE]	4.76	1	4	4	8	1029	114.927	5.49072
Q9CPT4	Myeloid-derived growth factor OS=Mus musculus GN=Mydgf PE=1 SV=1 - [MYDGF_MOUSE]	7.23	1	1	1	4	166	17.971	6.78564
Q6DFV7	Nuclear receptor coactivator 7 OS=Mus musculus GN=Ncoa7 PE=1 SV=2 - [NCOA7_MOUSE]	2.86	1	2	2	2	943	106.291	5.42725
Q5SWP3	NAC-alpha domain-containing protein 1 OS=Mus musculus GN=Nacad PE=1 SV=1 - [NACAD_MOUSE]	4.72	1	3	3	10	1504	156.668	4.56396
Q8BZL1	Sialidase-4 OS=Mus musculus GN=Neu4 PE=2 SV=3 - [NEUR4_MOUSE]	3.56	1	1	1	1	478	52.3929	6.52197
Q8CFV4	Neuritin OS=Mus musculus GN=Nrn1 PE=1 SV=1 - [NRN1_MOUSE]	13.38	2	1	1	1	142	15.3427	6.99072
Q9JHK4	Geranylgeranyl transferase type-2 subunit alpha OS=Mus musculus GN=Rabggta PE=1 SV=1 - [PGTA_MOUSE]	10.23	1	4	4	7	567	64.9481	5.79541
P70271	PDZ and LIM domain protein 4 OS=Mus musculus GN=Pdlim4 PE=1 SV=3 - [PDLI4_MOUSE]	6.36	1	1	1	3	330	35.5337	8.04541
O88531	Palmitoyl-protein thioesterase 1 OS=Mus musculus GN=Ppt1 PE=1 SV=2 - [PPT1_MOUSE]	17.97	3	3	3	7	306	34.4674	8.00146
Q60692	Proteasome subunit beta type-6 OS=Mus musculus GN=Psmb6 PE=1 SV=3 - [PSB6_MOUSE]	30.67	1	6	6	33	238	25.3625	5.10986
Q6PE13	Proline-rich transmembrane protein 3 OS=Mus musculus GN=Prrt3 PE=1 SV=1 - [PRRT3_MOUSE]	11.23	3	6	6	9	971	101.162	7.51807
Q64737	Trifunctional purine biosynthetic protein adenosine-3 OS=Mus musculus GN=Gart PE=1 SV=3 - [PUR2_MOUSE]	6.34	2	3	3	6	1010	107.436	6.68311
Q6NZL0	Protein SOGA3 OS=Mus musculus GN=Soga3 PE=1 SV=2 - [SOGA3_MOUSE]	9.31	1	6	6	13	945	103.416	6.13818
Q05186	Reticulocalbin-1 OS=Mus musculus GN=Rcn1 PE=1 SV=1 - [RCN1_MOUSE]	4.92	1	1	1	1	325	38.0896	4.84326
P41105	60S ribosomal protein L28 OS=Mus musculus GN=Rpl28 PE=1 SV=2 - [RL28_MOUSE]	21.9	1	2	2	3	137	15.7237	12.0151
Q8R2U0	Nucleoporin SEH1 OS=Mus musculus GN=Seh1l PE=2 SV=1 - [SEH1_MOUSE]	3.06	1	1	1	1	360	39.7494	8.04541
Q8BGT7	Survival of motor neuron-related-splicing factor 30 OS=Mus musculus GN=Smndc1 PE=1 SV=1 - [SPF30_MOUSE]	5.04	1	1	1	1	238	26.7365	7.23975
Q922B2	Aspartate--tRNA ligase, cytoplasmic OS=Mus musculus GN=Dars PE=1 SV=2 - [SYDC_MOUSE]	10.58	2	4	4	4	501	57.1112	6.49365
Q8R570	Synaptosomal-associated protein 47 OS=Mus musculus GN=Snap47 PE=1 SV=1 - [SNP47_MOUSE]	4.6	1	1	1	3	413	46.4951	5.75732
O88811	Signal transducing adapter molecule 2 OS=Mus musculus GN=Stam2 PE=1 SV=1 - [STAM2_MOUSE]	6.31	1	2	2	2	523	57.4185	5.07178
Q8CGC7	Bifunctional glutamate/proline--tRNA ligase OS=Mus musculus GN=Eprs PE=1 SV=4 - [SYEP_MOUSE]	1.79	1	3	3	8	1512	169.972	7.66455
Q8BU30	Isoleucine--tRNA ligase, cytoplasmic OS=Mus musculus GN=Iars PE=1 SV=2 - [SYIC_MOUSE]	2.54	1	2	2	4	1262	144.179	6.55127
P46096	Synaptotagmin-1 OS=Mus musculus GN=Syt1 PE=1 SV=1 - [SYT1_MOUSE]	17.34	2	4	4	8	421	47.3878	8.52881
Q9DCC8	Mitochondrial import receptor subunit TOM20 homolog OS=Mus musculus GN=Tomm20 PE=1 SV=1 - [TOM20_MOUSE]	8.97	1	1	1	2	145	16.2736	8.60205
Q9DAM7	Transmembrane protein 263 OS=Mus musculus GN=Tmem263 PE=1 SV=1 - [TM263_MOUSE]	22.61	1	2	2	3	115	11.542	9.31982
Q64514	Tripeptidyl-peptidase 2 OS=Mus musculus GN=Tpp2 PE=1 SV=3 - [TPP2_MOUSE]	4.2	4	3	3	11	1262	139.791	6.58057
Q9JKB1	Ubiquitin carboxyl-terminal hydrolase isozyme L3 OS=Mus musculus GN=Uchl3 PE=1 SV=2 - [UCHL3_MOUSE]	23.04	2	4	4	15	230	26.135	5.04639
Q8BY87	Ubiquitin carboxyl-terminal hydrolase 47 OS=Mus musculus GN=Usp47 PE=1 SV=2 - [UBP47_MOUSE]	0.87	1	1	1	1	1376	157.356	5.10986
O35633	Vesicular inhibitory amino acid transporter OS=Mus musculus GN=Slc32a1 PE=1 SV=3 - [VIAAT_MOUSE]	5.71	2	5	6	10	525	57.3435	6.63916
Q8VDZ4	Palmitoyltransferase ZDHHC5 OS=Mus musculus GN=Zdhhc5 PE=1 SV=1 - [ZDHC5_MOUSE]	2.24	1	1	1	3	715	77.4521	9.01221
D3YZR4	Phosphodiesterase OS=Mus musculus GN=Pde10a PE=1 SV=1 - [D3YZR4_MOUSE]	2.54	3	1	1	1	512	58.7333	7.32764
A0A0R4J0M9	Deubiquitinating protein VCIP135 OS=Mus musculus GN=Vcpip1 PE=1 SV=1 - [A0A0R4J0M9_MOUSE]	3.85	2	3	3	3	1220	134.358	7.1665
A0A140LJB1	Contactin-associated protein-like 2 (Fragment) OS=Mus musculus GN=Cntnap2 PE=1 SV=2 - [A0A140LJB1_MOUSE]	9.24	3	1	1	1	119	13.1794	9.17334
F7APP3	Glycylpeptide N-tetradecanoyltransferase 2 OS=Mus musculus GN=Nmt2 PE=1 SV=1 - [F7APP3_MOUSE]	2.68	3	1	1	3	485	56.5017	9.56885
D3Z555	Janus kinase and microtubule-interacting protein 1 (Fragment) OS=Mus musculus GN=Jakmip1 PE=1 SV=1 - [D3Z555_MOUSE]	2.65	4	1	1	1	339	39.3479	8.90967
B7ZCU2	Abl interactor 1 OS=Mus musculus GN=Abi1 PE=1 SV=1 - [B7ZCU2_MOUSE]	21.12	7	6	7	16	393	43.1477	6.55127
F6QA95	Dynein heavy chain 12, axonemal (Fragment) OS=Mus musculus GN=Dnah12 PE=1 SV=1 - [F6QA95_MOUSE]	1.49	2	1	1	1	1340	152.304	5.70654
E9PZ41	Trafficking protein particle complex subunit 9 OS=Mus musculus GN=Trappc9 PE=1 SV=1 - [E9PZ41_MOUSE]	1.06	3	1	1	1	852	95.3479	7.13721
B8JJI7	Microtubule cross-linking factor 1 (Fragment) OS=Mus musculus GN=Mtcl1 PE=1 SV=1 - [B8JJI7_MOUSE]	0.8	3	1	1	1	1496	166.307	6.02393
E9PYF1	Aminopeptidase B OS=Mus musculus GN=Rnpep PE=1 SV=1 - [E9PYF1_MOUSE]	1.8	2	1	1	2	611	67.9589	5.50342
E9PUM3	Alpha-1,4 glucan phosphorylase OS=Mus musculus GN=Pygm PE=1 SV=1 - [E9PUM3_MOUSE]	5.7	2	1	2	4	754	87.4561	8.51416
E9Q9N6	Serine/threonine-protein kinase MARK2 OS=Mus musculus GN=Mark2 PE=1 SV=1 - [E9Q9N6_MOUSE]	3.39	14	2	2	3	707	79.0426	9.64209
J3QNU1	Arginyl-tRNA--protein transferase 1 OS=Mus musculus GN=Ate1 PE=1 SV=1 - [J3QNU1_MOUSE]	4.72	3	3	3	3	509	58.1836	7.25439
E9PWX1	Dipeptidyl aminopeptidase-like protein 6 OS=Mus musculus GN=Dpp6 PE=1 SV=1 - [E9PWX1_MOUSE]	8.38	4	7	7	13	859	97.163	6.48096
E9PX94	Coiled-coil and C2 domain-containing protein 1A OS=Mus musculus GN=Cc2d1a PE=1 SV=2 - [E9PX94_MOUSE]	1.9	2	1	1	1	897	98.5824	7.35693
Q8BH80	Vesicle-associated membrane protein, associated protein B and C OS=Mus musculus GN=Vapb PE=1 SV=1 - [Q8BH80_MOUSE]	13.58	2	3	3	7	243	26.901	7.78174
J3QMM7	ATP-dependent (S)-NAD(P)H-hydrate dehydratase OS=Mus musculus GN=Naxd PE=1 SV=1 - [J3QMM7_MOUSE]	30.58	5	6	6	27	327	35.1472	8.1333
Q9R1R8	Retinol dehydrogenase 11 OS=Mus musculus GN=Rdh11 PE=1 SV=1 - [Q9R1R8_MOUSE]	4.67	2	1	1	2	300	33.2192	8.79248
Q9CQF7	Prefoldin 1 OS=Mus musculus GN=Pfdn1 PE=1 SV=1 - [Q9CQF7_MOUSE]	35.25	2	5	5	18	122	14.2465	6.81494
D3YX62	Heme oxygenase 2 (Fragment) OS=Mus musculus GN=Hmox2 PE=1 SV=1 - [D3YX62_MOUSE]	5.26	2	1	1	1	228	26.3691	5.85889
B1ATL6	Dual-specificity mitogen-activated protein kinase kinase 4 (Fragment) OS=Mus musculus GN=Map2k4 PE=1 SV=1 - [B1ATL6_MOUSE]	8.25	2	1	1	2	206	22.4612	8.646
H3BL05	Zinc finger protein 428 (Fragment) OS=Mus musculus GN=Zfp428 PE=1 SV=1 - [H3BL05_MOUSE]	31.37	3	4	4	7	153	16.3073	4.2085
E9Q6R3	Vesicle-trafficking protein SEC22b OS=Mus musculus GN=Sec22b PE=1 SV=1 - [E9Q6R3_MOUSE]	26.51	3	3	3	12	166	18.9106	5.92236
A0A0U1RPL0	Ataxin-2-like protein OS=Mus musculus GN=Atxn2l PE=1 SV=1 - [A0A0U1RPL0_MOUSE]	6.2	4	4	4	9	1096	115.195	8.66064
D3Z3F8	Spartin OS=Mus musculus GN=Spg20 PE=1 SV=1 - [D3Z3F8_MOUSE]	2.58	2	1	1	1	582	63.0407	5.57959
D3Z4W5	Protein 1700074P13Rik (Fragment) OS=Mus musculus GN=1700074P13Rik PE=3 SV=1 - [D3Z4W5_MOUSE]	3.98	2	1	1	3	176	20.137	5.05908
F7DCH5	CLIP-associating protein 2 OS=Mus musculus GN=Clasp2 PE=1 SV=1 - [F7DCH5_MOUSE]	8.88	1	1	8	23	1307	142.762	8.66064
D6RFU2	Monoacylglycerol lipase ABHD12 OS=Mus musculus GN=Abhd12 PE=1 SV=1 - [D6RFU2_MOUSE]	16.78	3	2	2	3	298	33.3141	8.5874
D6RFB9	Syntaxin-1A OS=Mus musculus GN=Stx1a PE=1 SV=1 - [D6RFB9_MOUSE]	20.31	6	4	5	11	256	29.4666	4.98291
F6RCU2	CAP-Gly domain-containing linker protein 1 (Fragment) OS=Mus musculus GN=Clip1 PE=1 SV=1 - [F6RCU2_MOUSE]	8.07	7	4	5	6	1066	121.34	5.22412
B1AVF2	TSC22 domain family protein 3 OS=Mus musculus GN=Tsc22d3 PE=1 SV=1 - [B1AVF2_MOUSE]	34.51	2	3	3	5	113	12.5544	4.67822
E9Q8N5	CLIP-associating protein 2 OS=Mus musculus GN=Clasp2 PE=1 SV=1 - [E9Q8N5_MOUSE]	8.32	3	1	8	21	1286	140.638	8.63135
P83882	60S ribosomal protein L36a OS=Mus musculus GN=Rpl36a PE=1 SV=2 - [RL36A_MOUSE]	13.21	1	2	2	2	106	12.4328	10.5796
P84089	Enhancer of rudimentary homolog OS=Mus musculus GN=Erh PE=1 SV=1 - [ERH_MOUSE]	16.35	2	1	1	22	104	12.251	5.92236
Q9CQF3	Cleavage and polyadenylation specificity factor subunit 5 OS=Mus musculus GN=Nudt21 PE=1 SV=1 - [CPSF5_MOUSE]	15.42	1	2	2	2	227	26.2237	8.82178
Q6ZWZ6	40S ribosomal protein S12 OS=Mus musculus GN=Rps12 PE=1 SV=1 - [Q6ZWZ6_MOUSE]	50	2	6	6	11	132	14.5055	7.21045
Q6ZWX6	Eukaryotic translation initiation factor 2 subunit 1 OS=Mus musculus GN=Eif2s1 PE=1 SV=3 - [IF2A_MOUSE]	6.98	1	3	3	6	315	36.0854	5.08447
Q8BP67	60S ribosomal protein L24 OS=Mus musculus GN=Rpl24 PE=1 SV=2 - [RL24_MOUSE]	21.66	1	3	3	9	157	17.7679	11.2534
P45952	Medium-chain specific acyl-CoA dehydrogenase, mitochondrial OS=Mus musculus GN=Acadm PE=1 SV=1 - [ACADM_MOUSE]	9.5	2	2	2	7	421	46.4516	8.36768
P56379	6.8 kDa mitochondrial proteolipid OS=Mus musculus GN=Mp68 PE=1 SV=1 - [68MP_MOUSE]	13.79	1	1	1	1	58	6.69359	9.99365
Q8QZR5	Alanine aminotransferase 1 OS=Mus musculus GN=Gpt PE=1 SV=3 - [ALAT1_MOUSE]	10.69	1	5	5	9	496	55.107	6.63916
Q9JLJ2	4-trimethylaminobutyraldehyde dehydrogenase OS=Mus musculus GN=Aldh9a1 PE=1 SV=1 - [AL9A1_MOUSE]	15.18	2	5	5	7	494	53.4801	6.97607
Q3UL36	Arginine and glutamate-rich protein 1 OS=Mus musculus GN=Arglu1 PE=1 SV=2 - [ARGL1_MOUSE]	3.32	1	1	1	2	271	32.8677	10.3599
P10107	Annexin A1 OS=Mus musculus GN=Anxa1 PE=1 SV=2 - [ANXA1_MOUSE]	4.05	1	1	1	1	346	38.71	7.37158
Q9D7N9	Adipocyte plasma membrane-associated protein OS=Mus musculus GN=Apmap PE=1 SV=1 - [APMAP_MOUSE]	11.33	1	2	2	3	415	46.4047	6.31592
Q99JY9	Actin-related protein 3 OS=Mus musculus GN=Actr3 PE=1 SV=3 - [ARP3_MOUSE]	24.16	4	5	5	7	418	47.327	5.88428
P97450	ATP synthase-coupling factor 6, mitochondrial OS=Mus musculus GN=Atp5j PE=1 SV=1 - [ATP5J_MOUSE]	50.93	2	6	6	16	108	12.4886	9.36377
Q9CXE2	B-cell CLL/lymphoma 7 protein family member A OS=Mus musculus GN=Bcl7a PE=2 SV=1 - [BCL7A_MOUSE]	10.95	6	1	2	5	210	22.7669	5.05908
O08688	Calpain-5 OS=Mus musculus GN=Capn5 PE=1 SV=1 - [CAN5_MOUSE]	2.34	1	1	1	1	640	72.9086	7.35693
P28651	Carbonic anhydrase-related protein OS=Mus musculus GN=Ca8 PE=1 SV=5 - [CAH8_MOUSE]	12.71	1	2	2	5	291	33.0605	4.77979
Q3V3V9	Capping protein, Arp2/3 and myosin-I linker protein 2 OS=Mus musculus GN=Carmil2 PE=1 SV=2 - [CARL2_MOUSE]	6.02	1	4	4	11	1296	141.284	7.18115
Q61081	Hsp90 co-chaperone Cdc37 OS=Mus musculus GN=Cdc37 PE=1 SV=1 - [CDC37_MOUSE]	4.75	1	1	1	1	379	44.5649	5.33838
Q9CQD4	Charged multivesicular body protein 1b-2 OS=Mus musculus GN=Chmp1b2 PE=2 SV=2 - [CH1B2_MOUSE]	7.54	1	2	2	2	199	22.1472	8.104
Q2KN98	Cytospin-A OS=Mus musculus GN=Specc1l PE=1 SV=1 - [CYTSA_MOUSE]	1.88	2	1	1	1	1118	124.412	5.75732
Q8BIQ5	Cleavage stimulation factor subunit 2 OS=Mus musculus GN=Cstf2 PE=1 SV=2 - [CSTF2_MOUSE]	25	5	7	9	22	580	61.3015	6.82959
Q80TQ2	Ubiquitin carboxyl-terminal hydrolase CYLD OS=Mus musculus GN=Cyld PE=1 SV=2 - [CYLD_MOUSE]	1.37	2	1	1	1	952	106.517	5.63037
Q9WVK4	EH domain-containing protein 1 OS=Mus musculus GN=Ehd1 PE=1 SV=1 - [EHD1_MOUSE]	17.04	1	5	5	6	534	60.5646	6.82959
Q99MS7	EH domain-binding protein 1-like protein 1 OS=Mus musculus GN=Ehbp1l1 PE=1 SV=1 - [EH1L1_MOUSE]	2.16	1	2	2	7	1716	184.722	4.729
Q63829	COMM domain-containing protein 3 OS=Mus musculus GN=Commd3 PE=1 SV=1 - [COMD3_MOUSE]	15.9	1	2	2	7	195	22.023	5.59229
Q9CPQ1	Cytochrome c oxidase subunit 6C OS=Mus musculus GN=Cox6c PE=1 SV=3 - [COX6C_MOUSE]	36.84	2	4	4	9	76	8.46351	10.1401
Q8CIE6	Coatomer subunit alpha OS=Mus musculus GN=Copa PE=1 SV=2 - [COPA_MOUSE]	3.76	2	3	3	4	1224	138.344	7.6499
Q6P9K8	Caskin-1 OS=Mus musculus GN=Caskin1 PE=1 SV=2 - [CSKI1_MOUSE]	18.1	1	12	12	43	1431	150.403	9.17334
Q99LJ0	CTTNBP2 N-terminal-like protein OS=Mus musculus GN=Cttnbp2nl PE=1 SV=1 - [CT2NL_MOUSE]	3.45	1	1	1	1	638	69.7985	7.7085
Q9QZB9	Dynactin subunit 5 OS=Mus musculus GN=Dctn5 PE=1 SV=1 - [DCTN5_MOUSE]	24.18	1	3	3	4	182	20.1273	8.01611
Q8N7N5	DDB1- and CUL4-associated factor 8 OS=Mus musculus GN=Dcaf8 PE=1 SV=1 - [DCAF8_MOUSE]	4.4	1	2	2	3	591	65.9908	5.87158
Q501J6	Probable ATP-dependent RNA helicase DDX17 OS=Mus musculus GN=Ddx17 PE=1 SV=1 - [DDX17_MOUSE]	13.38	2	5	7	9	650	72.354	8.5874
Q9QYJ3	DnaJ homolog subfamily B member 1 OS=Mus musculus GN=Dnajb1 PE=1 SV=3 - [DNJB1_MOUSE]	11.47	1	3	3	10	340	38.1434	8.63135
Q8BPN8	DmX-like protein 2 OS=Mus musculus GN=Dmxl2 PE=1 SV=3 - [DMXL2_MOUSE]	4.12	4	8	8	22	3032	337.995	6.41748
Q8C522	Endonuclease domain-containing 1 protein OS=Mus musculus GN=Endod1 PE=1 SV=2 - [ENDD1_MOUSE]	15.17	1	5	5	16	501	55.2267	6.16357
Q6A0A9	Constitutive coactivator of PPAR-gamma-like protein 1 OS=Mus musculus GN=FAM120A PE=1 SV=2 - [F120A_MOUSE]	1.17	1	1	1	1	1112	121.569	8.92432
O35392	Forkhead box protein D2 OS=Mus musculus GN=Foxd2 PE=2 SV=1 - [FOXD2_MOUSE]	9.76	1	1	1	1	492	48.9061	7.06396
O70443	Guanine nucleotide-binding protein G(z) subunit alpha OS=Mus musculus GN=Gnaz PE=1 SV=4 - [GNAZ_MOUSE]	3.94	1	2	2	5	355	40.8238	7.60596
Q91X72	Hemopexin OS=Mus musculus GN=Hpx PE=1 SV=2 - [HEMO_MOUSE]	8.7	1	2	2	12	460	51.2852	7.79639
Q99L45	Eukaryotic translation initiation factor 2 subunit 2 OS=Mus musculus GN=Eif2s2 PE=1 SV=1 - [IF2B_MOUSE]	3.63	1	1	1	1	331	38.0682	5.79541
Q9D819	Inorganic pyrophosphatase OS=Mus musculus GN=Ppa1 PE=1 SV=1 - [IPYR_MOUSE]	19.72	1	4	4	9	289	32.6462	5.60498
Q8BYN3	Inositol-tetrakisphosphate 1-kinase OS=Mus musculus GN=Itpk1 PE=2 SV=1 - [ITPK1_MOUSE]	5.25	1	1	1	1	419	46.1164	6.29053
P53395	Lipoamide acyltransferase component of branched-chain alpha-keto acid dehydrogenase complex, mitochondrial OS=Mus musculus GN=Dbt PE=1 SV=2 - [ODB2_MOUSE]	6.02	1	3	3	5	482	53.2129	8.60205
Q91W45	Polyadenylate-binding protein-interacting protein 2B OS=Mus musculus GN=Paip2b PE=1 SV=2 - [PAI2B_MOUSE]	12.5	1	1	1	1	136	15.4621	4.32275
P70188	Kinesin-associated protein 3 OS=Mus musculus GN=Kifap3 PE=1 SV=1 - [KIFA3_MOUSE]	1.64	1	1	1	2	793	91.2327	5.10986
Q6PER3	Microtubule-associated protein RP/EB family member 3 OS=Mus musculus GN=Mapre3 PE=1 SV=1 - [MARE3_MOUSE]	19.22	3	5	5	21	281	31.946	5.5415
Q8VEM8	Phosphate carrier protein, mitochondrial OS=Mus musculus GN=Slc25a3 PE=1 SV=1 - [MPCP_MOUSE]	21.85	2	6	6	11	357	39.6065	9.26123
Q8VCR8	Myosin light chain kinase 2, skeletal/cardiac muscle OS=Mus musculus GN=Mylk2 PE=1 SV=2 - [MYLK2_MOUSE]	7.83	1	1	1	1	613	65.9483	5.66846
Q9D6J5	NADH dehydrogenase [ubiquinone] 1 beta subcomplex subunit 8, mitochondrial OS=Mus musculus GN=Ndufb8 PE=1 SV=1 - [NDUB8_MOUSE]	8.6	1	1	1	4	186	21.8615	6.63916
Q8BM13	Noelin-2 OS=Mus musculus GN=Olfm2 PE=1 SV=2 - [NOE2_MOUSE]	2.46	1	1	1	1	448	50.6881	8.51416
Q9DB60	Prostamide/prostaglandin F synthase OS=Mus musculus GN=Fam213b PE=1 SV=1 - [PGFS_MOUSE]	23.88	2	3	3	7	201	21.6563	6.7417
O35954	Membrane-associated phosphatidylinositol transfer protein 1 OS=Mus musculus GN=Pitpnm1 PE=1 SV=1 - [PITM1_MOUSE]	4.02	2	3	3	4	1243	134.855	6.06201
Q9Z2M7	Phosphomannomutase 2 OS=Mus musculus GN=Pmm2 PE=1 SV=1 - [PMM2_MOUSE]	9.92	1	1	2	4	242	27.639	6.41748
P20918	Plasminogen OS=Mus musculus GN=Plg PE=1 SV=3 - [PLMN_MOUSE]	2.59	1	1	1	1	812	90.7489	6.59521
Q9QUR6	Prolyl endopeptidase OS=Mus musculus GN=Prep PE=1 SV=1 - [PPCE_MOUSE]	3.66	1	2	2	5	710	80.6999	5.73193
P04925	Major prion protein OS=Mus musculus GN=Prnp PE=1 SV=2 - [PRIO_MOUSE]	8.27	1	1	1	1	254	27.9595	9.33447
Q9Z1S5	Neuronal-specific septin-3 OS=Mus musculus GN=Sept3 PE=1 SV=2 - [SEPT3_MOUSE]	28.29	1	9	9	15	350	40.0126	6.81494
Q61165	Sodium/hydrogen exchanger 1 OS=Mus musculus GN=Slc9a1 PE=1 SV=1 - [SL9A1_MOUSE]	4.76	1	2	2	7	820	91.4095	7.12256
Q6P8X1	Sorting nexin-6 OS=Mus musculus GN=Snx6 PE=1 SV=2 - [SNX6_MOUSE]	15.02	1	4	4	5	406	46.6198	6.16357
Q8CH25	SAFB-like transcription modulator OS=Mus musculus GN=Sltm PE=1 SV=1 - [SLTM_MOUSE]	1.45	1	1	1	1	1031	116.85	7.72314
O88834	SH2 domain-containing adapter protein D OS=Mus musculus GN=Shd PE=1 SV=1 - [SHD_MOUSE]	7.87	1	2	2	3	343	38.4577	5.04639
Q8BYW1	Rho GTPase-activating protein 25 OS=Mus musculus GN=Arhgap25 PE=1 SV=2 - [RHG25_MOUSE]	2.31	1	1	1	1	648	73.337	6.37939
B2RQE8	Rho GTPase-activating protein 42 OS=Mus musculus GN=Arhgap42 PE=1 SV=1 - [RHG42_MOUSE]	2.26	1	1	1	1	841	94.5759	8.00146
Q9D1H8	39S ribosomal protein L53, mitochondrial OS=Mus musculus GN=Mrpl53 PE=1 SV=1 - [RM53_MOUSE]	11.86	1	1	1	1	118	12.7296	9.5249
P14115	60S ribosomal protein L27a OS=Mus musculus GN=Rpl27a PE=1 SV=5 - [RL27A_MOUSE]	12.16	1	3	3	3	148	16.595	11.1216
Q9EQZ6	Rap guanine nucleotide exchange factor 4 OS=Mus musculus GN=Rapgef4 PE=1 SV=1 - [RPGF4_MOUSE]	1.09	1	1	1	1	1011	115.418	6.91748
Q5SUC9	Protein SCO1 homolog, mitochondrial OS=Mus musculus GN=Sco1 PE=1 SV=1 - [SCO1_MOUSE]	5.63	2	1	1	1	284	31.5973	8.47021
Q8C145	Zinc transporter ZIP6 OS=Mus musculus GN=Slc39a6 PE=1 SV=1 - [S39A6_MOUSE]	1.57	1	1	1	1	765	86.3258	6.84424
Q7TPE5	Probable RNA polymerase II nuclear localization protein SLC7A6OS OS=Mus musculus GN=Slc7a6os PE=1 SV=1 - [S7A6O_MOUSE]	3.59	1	1	1	1	306	35.0195	4.57666
Q80ZS3	28S ribosomal protein S26, mitochondrial OS=Mus musculus GN=Mrps26 PE=1 SV=1 - [RT26_MOUSE]	9.5	1	1	1	1	200	23.4295	9.96436
Q8R127	Saccharopine dehydrogenase-like oxidoreductase OS=Mus musculus GN=Sccpdh PE=1 SV=1 - [SCPDL_MOUSE]	7.23	3	3	3	3	429	47.0991	8.60205
Q9ERB0	Synaptosomal-associated protein 29 OS=Mus musculus GN=Snap29 PE=1 SV=1 - [SNP29_MOUSE]	17.69	1	3	3	6	260	29.5539	5.37646
Q7TNE3	Sperm-associated antigen 7 OS=Mus musculus GN=Spag7 PE=1 SV=1 - [SPAG7_MOUSE]	4.41	1	1	1	2	227	25.9051	7.43018
Q9Z0F7	Gamma-synuclein OS=Mus musculus GN=Sncg PE=1 SV=1 - [SYUG_MOUSE]	13.82	1	2	2	2	123	13.1516	4.65283
P26638	Serine--tRNA ligase, cytoplasmic OS=Mus musculus GN=Sars PE=1 SV=3 - [SYSC_MOUSE]	16.6	4	7	7	16	512	58.3517	6.30322
Q8BHL3	TBC1 domain family member 10B OS=Mus musculus GN=Tbc1d10b PE=1 SV=2 - [TB10B_MOUSE]	3.38	1	1	1	1	798	87.2206	8.89502
P11983	T-complex protein 1 subunit alpha OS=Mus musculus GN=Tcp1 PE=1 SV=3 - [TCPA_MOUSE]	20.86	2	7	7	26	556	60.4107	6.16357
Q6A039	TBC1 domain family member 12 OS=Mus musculus GN=Tbc1d12 PE=1 SV=2 - [TBC12_MOUSE]	2.16	2	1	1	1	696	76.7621	6.16357
Q99KF1	Transmembrane emp24 domain-containing protein 9 OS=Mus musculus GN=Tmed9 PE=1 SV=2 - [TMED9_MOUSE]	8.09	1	2	2	2	235	27.1101	8.41162
Q80W04	Transmembrane and coiled-coil domains protein 2 OS=Mus musculus GN=Tmcc2 PE=1 SV=1 - [TMCC2_MOUSE]	2.27	1	1	1	1	706	77.0072	6.84424
O88746	Target of Myb protein 1 OS=Mus musculus GN=Tom1 PE=1 SV=1 - [TOM1_MOUSE]	22.97	2	6	6	7	492	54.2912	4.94482
Q9QZM0	Ubiquilin-2 OS=Mus musculus GN=Ubqln2 PE=1 SV=2 - [UBQL2_MOUSE]	14.42	1	3	6	37	638	67.3083	5.22412
Q99NB8	Ubiquilin-4 OS=Mus musculus GN=Ubqln4 PE=1 SV=1 - [UBQL4_MOUSE]	6.54	1	1	2	3	596	63.4652	5.03369
Q8R317	Ubiquilin-1 OS=Mus musculus GN=Ubqln1 PE=1 SV=1 - [UBQL1_MOUSE]	17.18	1	3	6	19	582	61.9372	4.94482
Q8VE47	Ubiquitin-like modifier-activating enzyme 5 OS=Mus musculus GN=Uba5 PE=1 SV=2 - [UBA5_MOUSE]	13.9	2	4	4	11	403	44.761	4.95752
A0A140LHG3	A-kinase anchor protein 13 (Fragment) OS=Mus musculus GN=Akap13 PE=1 SV=1 - [A0A140LHG3_MOUSE]	2.64	3	1	1	4	607	69.1458	9.0708
F8WI95	Methylthioribose-1-phosphate isomerase (Fragment) OS=Mus musculus GN=Mri1 PE=1 SV=1 - [F8WI95_MOUSE]	23.42	3	2	2	2	158	16.9879	7.40088
A0A0G2JDJ5	Farnesyl pyrophosphate synthase (Fragment) OS=Mus musculus GN=Fdps PE=4 SV=1 - [A0A0G2JDJ5_MOUSE]	14.88	4	1	1	1	121	13.8661	5.94775
A0A1B0GTA1	60S ribosomal protein L13a (Fragment) OS=Mus musculus GN=Rpl13a PE=4 SV=1 - [A0A1B0GTA1_MOUSE]	14.69	8	2	2	2	177	20.5578	11.1216
F6T9T6	Protein shisa-7 (Fragment) OS=Mus musculus GN=Shisa7 PE=1 SV=1 - [F6T9T6_MOUSE]	2.67	2	1	1	1	375	40.527	10.3599
D3Z519	Diacylglycerol kinase OS=Mus musculus GN=Dgki PE=1 SV=1 - [D3Z519_MOUSE]	9.01	5	4	5	13	899	101.267	7.97217
D3Z7V3	Sarcolemmal membrane-associated protein OS=Mus musculus GN=Slmap PE=1 SV=1 - [D3Z7V3_MOUSE]	1.52	3	1	1	1	790	90.6652	5.24951
F8VPX1	Ubiquitin carboxyl-terminal hydrolase 7 OS=Mus musculus GN=Usp7 PE=1 SV=1 - [F8VPX1_MOUSE]	1.36	3	1	1	1	1103	128.392	5.5542
E9QND8	Atlastin-2 OS=Mus musculus GN=Atl2 PE=1 SV=1 - [E9QND8_MOUSE]	9.47	2	2	2	5	412	46.8455	5.94775
A0A0A6YWM0	Protein Pcdh9 (Fragment) OS=Mus musculus GN=Pcdh9 PE=1 SV=1 - [A0A0A6YWM0_MOUSE]	1.37	5	1	1	1	873	96.1475	5.10986
E9PXJ0	Neuronal tyrosine-phosphorylated phosphoinositide-3-kinase adapter 1 (Fragment) OS=Mus musculus GN=Nyap1 PE=1 SV=1 - [E9PXJ0_MOUSE]	2.78	2	1	1	1	790	82.7496	9.18799
A0A0A6YW60	Target of rapamycin complex 2 subunit MAPKAP1 (Fragment) OS=Mus musculus GN=Mapkap1 PE=1 SV=1 - [A0A0A6YW60_MOUSE]	23.98	2	1	1	1	171	19.3337	8.27979
F7CCI4	Pre-mRNA-splicing regulator WTAP (Fragment) OS=Mus musculus GN=Wtap PE=1 SV=1 - [F7CCI4_MOUSE]	13.67	3	1	1	2	139	16.1462	4.93213
A0A0J9YTY0	Septin-11 OS=Mus musculus GN=Sept11 PE=1 SV=1 - [A0A0J9YTY0_MOUSE]	36.71	7	7	13	21	425	48.9481	6.96143
A0A0A6YXR4	Quinone oxidoreductase (Fragment) OS=Mus musculus GN=Cryz PE=1 SV=5 - [A0A0A6YXR4_MOUSE]	21.93	8	5	5	6	301	32.0587	8.29443
A0A0R4J0B5	Protein BC017158 OS=Mus musculus GN=BC017158 PE=1 SV=1 - [A0A0R4J0B5_MOUSE]	3	1	1	1	5	466	50.4981	7.56201
Q3UTM5	Regulator of G-protein-signaling 6 OS=Mus musculus GN=Rgs6 PE=1 SV=1 - [Q3UTM5_MOUSE]	10.6	12	2	2	2	368	42.2905	6.44287
G3X8X7	Vacuolar protein sorting 16 (Yeast) OS=Mus musculus GN=Vps16 PE=1 SV=1 - [G3X8X7_MOUSE]	2.38	2	1	1	1	839	94.7658	6.91748
Q91WB5	ABPA27 OS=Mus musculus GN=Scgb1b27 PE=1 SV=1 - [Q91WB5_MOUSE]	17.39	1	1	1	1	92	10.0732	5.43994
Q3TQP6	Malic enzyme OS=Mus musculus GN=Me1 PE=1 SV=1 - [Q3TQP6_MOUSE]	8.33	2	3	3	7	552	61.4417	6.48096
G3X915	LysM and putative peptidoglycan-binding domain-containing protein 2 OS=Mus musculus GN=Lysmd2 PE=1 SV=1 - [G3X915_MOUSE]	16.28	2	2	2	7	215	23.5801	5.51611
G5E850	Cytochrome b-5, isoform CRA_a OS=Mus musculus GN=Cyb5a PE=1 SV=1 - [G5E850_MOUSE]	18.37	3	1	1	1	98	11.1355	5.30029
A0A0R3P9D0	Phospholipid phosphatase-related protein type 3 OS=Mus musculus GN=Plppr3 PE=1 SV=1 - [A0A0R3P9D0_MOUSE]	4.75	3	3	3	3	716	76.6767	6.01123
Q3V117	ATP-citrate synthase OS=Mus musculus GN=Acly PE=1 SV=1 - [Q3V117_MOUSE]	8.99	3	7	7	24	1101	120.718	7.44482
G3X9K4	SAPS domain family, member 2, isoform CRA_a OS=Mus musculus GN=Ppp6r2 PE=1 SV=1 - [G3X9K4_MOUSE]	7.58	2	4	4	7	923	100.397	4.81787
Q8C2Q8	ATP synthase subunit gamma OS=Mus musculus GN=Atp5c1 PE=1 SV=1 - [Q8C2Q8_MOUSE]	36.86	7	10	10	69	274	30.2368	8.83643
J3QP80	MCG15559 OS=Mus musculus GN=Gm5814 PE=4 SV=1 - [J3QP80_MOUSE]	26.4	2	2	2	2	125	14.1531	4.85596
G3X9B1	HEAT repeat containing 1 OS=Mus musculus GN=Heatr1 PE=1 SV=1 - [G3X9B1_MOUSE]	1.03	1	1	1	1	2143	241.917	6.97607
D3Z0K9	Iron-sulfur cluster assembly enzyme ISCU, mitochondrial (Fragment) OS=Mus musculus GN=Iscu PE=1 SV=1 - [D3Z0K9_MOUSE]	12.5	3	1	1	1	136	14.6825	6.75635
F6QKX8	Protein Mmp27 (Fragment) OS=Mus musculus GN=Mmp27 PE=3 SV=1 - [F6QKX8_MOUSE]	3.4	3	1	1	2	470	53.51	8.36768
A2A8E2	Protein 0610037L13Rik OS=Mus musculus GN=0610037L13Rik PE=1 SV=1 - [A2A8E2_MOUSE]	42.75	6	5	5	8	138	15.7728	5.64307
E9Q3P4	Protein Cenpf OS=Mus musculus GN=Cenpf PE=1 SV=1 - [E9Q3P4_MOUSE]	0.7	1	1	1	1	2997	342.261	5.16064
E9Q3V6	Septin-2 OS=Mus musculus GN=Sept2 PE=1 SV=1 - [E9Q3V6_MOUSE]	20.56	9	4	4	15	321	36.9549	6.0874
E9PX33	RELT-like protein 2 OS=Mus musculus GN=Rell2 PE=1 SV=1 - [E9PX33_MOUSE]	16.98	2	1	1	1	212	21.9408	7.26904
Q5SVG5	AP-1 complex subunit beta-1 OS=Mus musculus GN=Ap1b1 PE=1 SV=1 - [Q5SVG5_MOUSE]	6.66	3	3	4	8	916	101.128	5.22412
A0A0G2JEH5	UDP-N-acetylglucosamine transferase subunit ALG14 homolog (Fragment) OS=Mus musculus GN=Alg14 PE=1 SV=1 - [A0A0G2JEH5_MOUSE]	5.26	1	1	1	1	133	15.3171	9.64209
D3YYL1	B-cell CLL/lymphoma 7 protein family member B OS=Mus musculus GN=Bcl7b PE=1 SV=1 - [D3YYL1_MOUSE]	33.1	6	1	2	4	145	16.0781	5.14795
B1B0C7	Basement membrane-specific heparan sulfate proteoglycan core protein OS=Mus musculus GN=Hspg2 PE=1 SV=1 - [B1B0C7_MOUSE]	1.28	3	3	3	4	4375	468.725	6.48096
A0A0R4J2D7	Microtubule-associated protein 9 (Fragment) OS=Mus musculus GN=Map9 PE=1 SV=1 - [A0A0R4J2D7_MOUSE]	2.52	4	1	1	3	357	38.9448	4.69092
A0A0U1RNX8	B-cell CLL/lymphoma 7 protein family member C OS=Mus musculus GN=Bcl7c PE=1 SV=1 - [A0A0U1RNX8_MOUSE]	12.03	6	1	2	4	241	26.3379	10.6528
A2AL79	Aspartyl/asparaginyl beta-hydroxylase OS=Mus musculus GN=Asph PE=1 SV=1 - [A2AL79_MOUSE]	22.34	8	2	2	2	197	20.7118	4.38623
D3YXT0	NADH dehydrogenase [ubiquinone] iron-sulfur protein 2, mitochondrial OS=Mus musculus GN=Ndufs2 PE=1 SV=1 - [D3YXT0_MOUSE]	14.42	4	4	4	9	437	49.5411	8.14795
B2KF67	Diphosphoinositol polyphosphate phosphohydrolase 1 OS=Mus musculus GN=Nudt3 PE=1 SV=1 - [B2KF67_MOUSE]	26.62	5	3	3	5	139	15.692	6.78564
A2AIM4	Tropomyosin beta chain OS=Mus musculus GN=Tpm2 PE=1 SV=1 - [A2AIM4_MOUSE]	17.96	4	1	3	6	284	32.9736	4.69092
B8JJ90	Apoptotic chromatin condensation inducer in the nucleus (Fragment) OS=Mus musculus GN=Acin1 PE=1 SV=8 - [B8JJ90_MOUSE]	9.95	6	1	1	1	221	24.443	5.30029
A0A0A6YWZ1	Acyl-CoA-binding domain-containing protein 6 (Fragment) OS=Mus musculus GN=Acbd6 PE=1 SV=1 - [A0A0A6YWZ1_MOUSE]	21.62	2	1	1	1	37	3.93093	7.12256
E9QAT4	Protein Sec16a OS=Mus musculus GN=Sec16a PE=1 SV=1 - [E9QAT4_MOUSE]	0.47	2	1	1	2	2357	254.045	5.80811
A0A0J9YUI7	OCIA domain-containing protein 2 (Fragment) OS=Mus musculus GN=Ociad2 PE=1 SV=3 - [A0A0J9YUI7_MOUSE]	9.2	3	1	1	1	87	9.74118	9.80322
Q9D0R8	Protein LSM12 homolog OS=Mus musculus GN=Lsm12 PE=1 SV=1 - [LSM12_MOUSE]	9.74	1	2	2	13	195	21.6871	7.73779
P62900	60S ribosomal protein L31 OS=Mus musculus GN=Rpl31 PE=1 SV=1 - [RL31_MOUSE]	22.4	3	3	3	8	125	14.4539	10.5356
Q9DB50	AP-1 complex subunit sigma-2 OS=Mus musculus GN=Ap1s2 PE=1 SV=1 - [AP1S2_MOUSE]	11.88	1	1	1	3	160	18.9169	5.47803
P68040	Receptor of activated protein C kinase 1 OS=Mus musculus GN=Rack1 PE=1 SV=3 - [RACK1_MOUSE]	2.84	1	1	1	1	317	35.0546	7.69385
Q61578	NADPH:adrenodoxin oxidoreductase, mitochondrial OS=Mus musculus GN=Fdxr PE=1 SV=1 - [ADRO_MOUSE]	7.29	1	2	2	6	494	54.1684	8.66064
Q9CQM6	Ankyrin repeat domain-containing protein 61 OS=Mus musculus GN=Ankrd61 PE=2 SV=1 - [ANR61_MOUSE]	3.8	1	1	1	1	421	46.5585	8.85107
Q64133	Amine oxidase [flavin-containing] A OS=Mus musculus GN=Maoa PE=1 SV=3 - [AOFA_MOUSE]	7.79	1	2	3	6	526	59.5637	7.81104
Q8BSZ2	AP-3 complex subunit sigma-2 OS=Mus musculus GN=Ap3s2 PE=1 SV=1 - [AP3S2_MOUSE]	9.33	1	1	1	1	193	22.0033	5.22412
Q8BW86	Rho guanine nucleotide exchange factor 33 OS=Mus musculus GN=Arhgef33 PE=1 SV=3 - [ARG33_MOUSE]	1.53	1	1	1	1	850	94.6984	6.63916
P03930	ATP synthase protein 8 OS=Mus musculus GN=Mtatp8 PE=1 SV=1 - [ATP8_MOUSE]	28.36	1	2	2	8	67	7.76119	9.87646
P14211	Calreticulin OS=Mus musculus GN=Calr PE=1 SV=1 - [CALR_MOUSE]	18.51	1	4	4	29	416	47.9649	4.48779
Q9JIG7	Coiled-coil domain-containing protein 22 OS=Mus musculus GN=Ccdc22 PE=1 SV=1 - [CCD22_MOUSE]	2.07	1	1	1	1	627	70.7998	6.01123
P28659	CUGBP Elav-like family member 1 OS=Mus musculus GN=Celf1 PE=1 SV=2 - [CELF1_MOUSE]	6.58	2	1	4	5	486	52.0739	8.45557
Q8BR90	UPF0600 protein C5orf51 homolog OS=Mus musculus PE=1 SV=1 - [CE051_MOUSE]	9.86	1	2	2	2	294	33.4496	5.18604
Q9CQX2	Cytochrome b5 type B OS=Mus musculus GN=Cyb5b PE=1 SV=1 - [CYB5B_MOUSE]	8.9	1	1	1	2	146	16.3078	4.89404
Q8C7E9	Cleavage stimulation factor subunit 2 tau variant OS=Mus musculus GN=Cstf2t PE=1 SV=2 - [CSTFT_MOUSE]	10.92	1	1	3	5	632	65.8195	7.25439
Q9D0M3	Cytochrome c1, heme protein, mitochondrial OS=Mus musculus GN=Cyc1 PE=1 SV=1 - [CY1_MOUSE]	13.54	1	3	3	65	325	35.3049	9.15869
Q8BL66	Early endosome antigen 1 OS=Mus musculus GN=Eea1 PE=1 SV=2 - [EEA1_MOUSE]	1.63	1	3	3	8	1411	160.817	5.77002
P63080	Gamma-aminobutyric acid receptor subunit beta-3 OS=Mus musculus GN=Gabrb3 PE=2 SV=1 - [GBRB3_MOUSE]	2.96	3	1	1	3	473	54.1308	9.1001
Q5SNZ0	Girdin OS=Mus musculus GN=Ccdc88a PE=1 SV=2 - [GRDN_MOUSE]	0.91	1	1	1	1	1873	215.786	6.23975
P26339	Chromogranin-A OS=Mus musculus GN=Chga PE=1 SV=1 - [CMGA_MOUSE]	7.99	8	1	2	2	463	51.7579	4.71631
P97478	5-demethoxyubiquinone hydroxylase, mitochondrial OS=Mus musculus GN=Coq7 PE=1 SV=3 - [COQ7_MOUSE]	5.07	3	1	1	2	217	24.0263	7.1665
Q922R1	UPF0183 protein C16orf70 homolog OS=Mus musculus PE=1 SV=2 - [CP070_MOUSE]	8.29	1	2	2	4	422	47.386	7.73779
P47941	Crk-like protein OS=Mus musculus GN=Crkl PE=1 SV=2 - [CRKL_MOUSE]	6.93	1	2	2	3	303	33.809	6.7417
Q8R555	Cartilage acidic protein 1 OS=Mus musculus GN=Crtac1 PE=2 SV=1 - [CRAC1_MOUSE]	1.39	1	1	1	1	646	70.2804	5.13525
Q8CIT0	Corticoliberin OS=Mus musculus GN=Crh PE=2 SV=1 - [CRF_MOUSE]	16.04	1	2	2	2	187	20.7649	10.521
Q570Y9	DEP domain-containing mTOR-interacting protein OS=Mus musculus GN=Deptor PE=1 SV=2 - [DPTOR_MOUSE]	2.69	1	1	1	1	409	46.0902	7.91357
Q3U7R1	Extended synaptotagmin-1 OS=Mus musculus GN=Esyt1 PE=1 SV=2 - [ESYT1_MOUSE]	1.37	1	1	1	1	1092	121.478	5.94775
A6H5Z3	Exocyst complex component 6B OS=Mus musculus GN=Exoc6b PE=1 SV=1 - [EXC6B_MOUSE]	1.36	1	1	1	1	810	94.0701	6.39209
Q80UW2	F-box only protein 2 OS=Mus musculus GN=Fbxo2 PE=1 SV=1 - [FBX2_MOUSE]	31.65	1	6	6	40	297	33.6551	4.28467
Q8CIB5	Fermitin family homolog 2 OS=Mus musculus GN=Fermt2 PE=1 SV=1 - [FERM2_MOUSE]	6.76	3	2	2	2	680	77.7505	6.69775
Q9QZQ8	Core histone macro-H2A.1 OS=Mus musculus GN=H2afy PE=1 SV=3 - [H2AY_MOUSE]	12.9	1	3	4	11	372	39.7105	9.80322
P42859	Huntingtin OS=Mus musculus GN=Htt PE=1 SV=2 - [HD_MOUSE]	0.45	2	1	1	1	3119	344.471	6.29053
Q80W93	Hydrocephalus-inducing protein OS=Mus musculus GN=Hydin PE=1 SV=2 - [HYDIN_MOUSE]	0.8	1	1	1	1	5154	581.154	6.37939
Q9JK92	Heat shock protein beta-8 OS=Mus musculus GN=Hspb8 PE=1 SV=1 - [HSPB8_MOUSE]	5.1	1	1	1	1	196	21.5197	5.021
Q61730	Interleukin-1 receptor accessory protein OS=Mus musculus GN=Il1rap PE=1 SV=1 - [IL1AP_MOUSE]	2.98	1	1	1	1	570	65.6986	7.76709
Q6P9J5	KN motif and ankyrin repeat domain-containing protein 4 OS=Mus musculus GN=Kank4 PE=1 SV=1 - [KANK4_MOUSE]	4.43	1	2	2	3	1016	110.336	4.88135
Q9DCS3	Trans-2-enoyl-CoA reductase, mitochondrial OS=Mus musculus GN=Mecr PE=1 SV=2 - [MECR_MOUSE]	20.38	2	4	4	6	373	40.3173	9.0708
Q60805	Tyrosine-protein kinase Mer OS=Mus musculus GN=Mertk PE=1 SV=1 - [MERTK_MOUSE]	3.62	1	1	1	1	994	110.088	5.50342
Q9Z2D6	Methyl-CpG-binding protein 2 OS=Mus musculus GN=Mecp2 PE=1 SV=1 - [MECP2_MOUSE]	15.5	3	6	6	7	484	52.2755	9.96436
O08919	Numb-like protein OS=Mus musculus GN=Numbl PE=1 SV=3 - [NUMBL_MOUSE]	9.27	1	4	4	5	604	64.0902	8.82178
Q5PR69	Uncharacterized protein KIAA1211 OS=Mus musculus GN=Kiaa1211 PE=1 SV=3 - [K1211_MOUSE]	4.56	3	3	3	4	1207	132.206	5.40186
Q5DTX6	Junctional protein associated with coronary artery disease OS=Mus musculus GN=Jcad PE=1 SV=2 - [JCAD_MOUSE]	2.95	1	2	2	2	1320	144.708	6.52197
O88447	Kinesin light chain 1 OS=Mus musculus GN=Klc1 PE=1 SV=3 - [KLC1_MOUSE]	15.71	6	8	8	19	541	61.4118	5.68115
P16054	Protein kinase C epsilon type OS=Mus musculus GN=Prkce PE=1 SV=1 - [KPCE_MOUSE]	4.34	1	2	2	4	737	83.507	7.03467
P24527	Leukotriene A-4 hydrolase OS=Mus musculus GN=Lta4h PE=1 SV=4 - [LKHA4_MOUSE]	3.11	1	2	2	4	611	69.0071	6.41748
Q9R1L5	Microtubule-associated serine/threonine-protein kinase 1 OS=Mus musculus GN=Mast1 PE=1 SV=3 - [MAST1_MOUSE]	1.34	1	1	1	1	1570	170.892	8.44092
Q8K3C3	Protein LZIC OS=Mus musculus GN=Lzic PE=1 SV=1 - [LZIC_MOUSE]	4.74	1	1	1	1	190	21.5231	4.95752
Q2WF71	Leucine-rich repeat and fibronectin type III domain-containing protein 1 OS=Mus musculus GN=Lrfn1 PE=1 SV=1 - [LRFN1_MOUSE]	1.57	1	1	1	2	766	81.8931	7.59131
P16332	Methylmalonyl-CoA mutase, mitochondrial OS=Mus musculus GN=Mut PE=1 SV=2 - [MUTA_MOUSE]	4.68	1	2	2	3	748	82.7916	6.88818
P62774	Myotrophin OS=Mus musculus GN=Mtpn PE=1 SV=2 - [MTPN_MOUSE]	20.34	1	2	2	5	118	12.8526	5.51611
Q8JZV7	N-acetylglucosamine-6-phosphate deacetylase OS=Mus musculus GN=Amdhd2 PE=1 SV=1 - [NAGA_MOUSE]	4.65	1	1	1	1	409	43.4733	6.22705
Q9CQJ8	NADH dehydrogenase [ubiquinone] 1 beta subcomplex subunit 9 OS=Mus musculus GN=Ndufb9 PE=1 SV=3 - [NDUB9_MOUSE]	15.64	1	2	2	2	179	21.9697	7.79639
Q8K596	Sodium/calcium exchanger 2 OS=Mus musculus GN=Slc8a2 PE=1 SV=1 - [NAC2_MOUSE]	3.58	1	2	2	2	921	100.647	5.12256
Q9CQS2	H/ACA ribonucleoprotein complex subunit 3 OS=Mus musculus GN=Nop10 PE=3 SV=1 - [NOP10_MOUSE]	20.31	1	2	2	2	64	7.70097	9.99365
P09103	Protein disulfide-isomerase OS=Mus musculus GN=P4hb PE=1 SV=2 - [PDIA1_MOUSE]	11.39	2	2	2	15	509	57.0228	4.88135
Q9WU78	Programmed cell death 6-interacting protein OS=Mus musculus GN=Pdcd6ip PE=1 SV=3 - [PDC6I_MOUSE]	6.21	1	3	3	6	869	95.9642	6.52197
Q3USB7	Inactive phospholipase C-like protein 1 OS=Mus musculus GN=Plcl1 PE=1 SV=3 - [PLCL1_MOUSE]	8.39	1	6	6	19	1096	122.594	5.64307
P36993	Protein phosphatase 1B OS=Mus musculus GN=Ppm1b PE=1 SV=1 - [PPM1B_MOUSE]	16.67	2	2	3	7	390	42.7676	5.18604
Q923M0	Protein phosphatase 1 regulatory subunit 16A OS=Mus musculus GN=Ppp1r16a PE=1 SV=1 - [PP16A_MOUSE]	3.63	1	1	1	1	524	57.4939	5.80811
A2AR02	Peptidyl-prolyl cis-trans isomerase G OS=Mus musculus GN=Ppig PE=1 SV=1 - [PPIG_MOUSE]	3.19	2	2	2	2	752	88.2719	10.272
O35449	Proline-rich transmembrane protein 1 OS=Mus musculus GN=Prrt1 PE=1 SV=1 - [PRRT1_MOUSE]	4.9	1	1	1	2	306	31.369	7.6499
Q9R1Z7	6-pyruvoyl tetrahydrobiopterin synthase OS=Mus musculus GN=Pts PE=1 SV=2 - [PTPS_MOUSE]	11.11	1	2	2	2	144	16.1782	6.52197
O70435	Proteasome subunit alpha type-3 OS=Mus musculus GN=Psma3 PE=1 SV=3 - [PSA3_MOUSE]	13.73	5	4	4	9	255	28.3871	5.43994
O54724	Polymerase I and transcript release factor OS=Mus musculus GN=Ptrf PE=1 SV=1 - [PTRF_MOUSE]	6.38	1	2	2	3	392	43.927	5.51611
O09061	Proteasome subunit beta type-1 OS=Mus musculus GN=Psmb1 PE=1 SV=1 - [PSB1_MOUSE]	14.58	1	2	2	2	240	26.3553	7.81104
P35293	Ras-related protein Rab-18 OS=Mus musculus GN=Rab18 PE=1 SV=2 - [RAB18_MOUSE]	12.62	1	2	2	3	206	23.0207	5.36377
P28650	Adenylosuccinate synthetase isozyme 1 OS=Mus musculus GN=Adssl1 PE=1 SV=2 - [PURA1_MOUSE]	8.1	2	2	3	6	457	50.223	8.42627
Q8BJU9	Peptide chain release factor 1-like, mitochondrial OS=Mus musculus GN=Mtrf1l PE=2 SV=1 - [RF1ML_MOUSE]	5.63	1	1	1	2	373	42.2216	8.1626
Q9CQE5	Regulator of G-protein signaling 10 OS=Mus musculus GN=Rgs10 PE=1 SV=1 - [RGS10_MOUSE]	27.07	1	3	3	3	181	21.1376	6.81494
Q9QUI0	Transforming protein RhoA OS=Mus musculus GN=Rhoa PE=1 SV=1 - [RHOA_MOUSE]	26.94	7	4	4	8	193	21.7681	6.1001
Q9DB15	39S ribosomal protein L12, mitochondrial OS=Mus musculus GN=Mrpl12 PE=1 SV=2 - [RM12_MOUSE]	23.88	1	2	2	5	201	21.6948	9.29053
Q56A07	Sodium channel subunit beta-2 OS=Mus musculus GN=Scn2b PE=1 SV=1 - [SCN2B_MOUSE]	4.65	1	1	1	1	215	24.2122	6.53662
Q9EQC5	N-terminal kinase-like protein OS=Mus musculus GN=Scyl1 PE=1 SV=1 - [SCYL1_MOUSE]	1.86	1	1	1	1	806	89.104	6.44287
Q9Z2I8	Succinate--CoA ligase [GDP-forming] subunit beta, mitochondrial OS=Mus musculus GN=Suclg2 PE=1 SV=3 - [SUCB2_MOUSE]	15.7	2	4	4	9	433	46.8107	7.02002
Q64332	Synapsin-2 OS=Mus musculus GN=Syn2 PE=1 SV=2 - [SYN2_MOUSE]	29.52	1	13	15	56	586	63.3327	8.42627
Q7TMY4	THO complex subunit 7 homolog OS=Mus musculus GN=Thoc7 PE=1 SV=2 - [THOC7_MOUSE]	9.8	1	1	1	1	204	23.7	5.66846
P52196	Thiosulfate sulfurtransferase OS=Mus musculus GN=Tst PE=1 SV=3 - [THTR_MOUSE]	21.21	1	4	4	12	297	33.4448	7.85498
Q8BZA9	Fructose-2,6-bisphosphatase TIGAR OS=Mus musculus GN=Tigar PE=1 SV=1 - [TIGAR_MOUSE]	11.52	1	2	2	6	269	29.1718	8.17725
Q9CQM5	Thioredoxin domain-containing protein 17 OS=Mus musculus GN=Txndc17 PE=1 SV=1 - [TXD17_MOUSE]	40.65	1	3	3	7	123	14.0057	4.76709
Q4KUS2	Protein unc-13 homolog A OS=Mus musculus GN=Unc13a PE=1 SV=3 - [UN13A_MOUSE]	0.76	2	1	1	1	1712	193.66	5.24951
P29533	Vascular cell adhesion protein 1 OS=Mus musculus GN=Vcam1 PE=1 SV=1 - [VCAM1_MOUSE]	5.14	2	2	2	2	739	81.2655	5.30029
P57746	V-type proton ATPase subunit D OS=Mus musculus GN=Atp6v1d PE=1 SV=1 - [VATD_MOUSE]	12.15	1	3	3	6	247	28.3514	9.45166
Q8CC88	von Willebrand factor A domain-containing protein 8 OS=Mus musculus GN=Vwa8 PE=1 SV=2 - [VWA8_MOUSE]	1.57	1	2	2	2	1905	213.287	6.59521
Q8VEJ9	Vacuolar protein sorting-associated protein 4A OS=Mus musculus GN=Vps4a PE=1 SV=1 - [VPS4A_MOUSE]	13.96	2	3	4	6	437	48.8761	7.79639
Q8VDD8	WAS protein family homolog 1 OS=Mus musculus GN=Wash1 PE=1 SV=1 - [WASH1_MOUSE]	1.68	1	1	1	1	475	51.6266	5.43994
Q91YD9	Neural Wiskott-Aldrich syndrome protein OS=Mus musculus GN=Wasl PE=1 SV=1 - [WASL_MOUSE]	5.99	1	1	1	1	501	54.2403	7.92822
D3Z636	Inorganic pyrophosphatase 2, mitochondrial OS=Mus musculus GN=Ppa2 PE=1 SV=1 - [D3Z636_MOUSE]	15.2	3	3	3	4	329	37.9611	7.13721
J3QK20	Voltage-dependent L-type calcium channel subunit beta-4 OS=Mus musculus GN=Cacnb4 PE=1 SV=1 - [J3QK20_MOUSE]	11.37	9	2	4	22	519	57.8144	9.14404
A0A0U1RNT6	S-adenosylmethionine synthase isoform type-2 OS=Mus musculus GN=Mat2a PE=1 SV=1 - [A0A0U1RNT6_MOUSE]	13.54	4	3	3	12	362	39.7133	6.03662
F6ZV59	Heterogeneous nuclear ribonucleoprotein D0 (Fragment) OS=Mus musculus GN=Hnrnpd PE=1 SV=1 - [F6ZV59_MOUSE]	27.78	7	5	5	20	216	24.7055	9.5249
Z4YKV1	Guanine nucleotide-binding protein G(s) subunit alpha isoforms short OS=Mus musculus GN=Gnas PE=1 SV=1 - [Z4YKV1_MOUSE]	11.87	6	3	5	20	379	44.1503	6.46826
E9QN14	SLIT-ROBO Rho GTPase-activating protein 3 OS=Mus musculus GN=Srgap3 PE=1 SV=1 - [E9QN14_MOUSE]	9.12	3	7	7	10	1075	121.648	6.56592
A2AKD7	Alpha-1-syntrophin OS=Mus musculus GN=Snta1 PE=1 SV=1 - [A2AKD7_MOUSE]	14.83	2	4	4	6	499	53.2494	6.80029
A0A140T8M7	Protein Rpl23a-ps3 OS=Mus musculus GN=Rpl23a-ps3 PE=3 SV=1 - [A0A140T8M7_MOUSE]	10.9	2	2	2	6	156	17.6871	10.4185
E9PV26	Protein Prr36 OS=Mus musculus GN=Prr36 PE=1 SV=1 - [E9PV26_MOUSE]	3.1	1	2	2	2	1098	110.624	9.979
E9Q8K5	Titin OS=Mus musculus GN=Ttn PE=1 SV=1 - [E9Q8K5_MOUSE]	0.12	5	2	2	4	33467	3713.74	6.3667
D6RCW3	Cholinephosphotransferase 1 OS=Mus musculus GN=Chpt1 PE=1 SV=1 - [D6RCW3_MOUSE]	5.5	4	1	1	1	218	24.4214	5.77002
A2A6M1	Vacuolar-sorting protein SNF8 OS=Mus musculus GN=Snf8 PE=1 SV=1 - [A2A6M1_MOUSE]	6.01	2	1	1	2	233	25.9515	6.22705
A0A0N4SVP8	Protein Gm5580 OS=Mus musculus GN=Gm5580 PE=3 SV=1 - [A0A0N4SVP8_MOUSE]	6.33	7	1	2	6	411	46.9294	7.75244
F8VQK5	SAM and SH3 domain-containing protein 1 OS=Mus musculus GN=Sash1 PE=1 SV=1 - [F8VQK5_MOUSE]	2.6	2	2	2	2	1230	135.537	6.20166
E9Q3K3	Arf-GAP with GTPase, ANK repeat and PH domain-containing protein 1 OS=Mus musculus GN=Agap1 PE=1 SV=2 - [E9Q3K3_MOUSE]	2.09	3	1	1	1	670	73.8792	8.57275
D3Z2W0	TNFAIP3-interacting protein 1 OS=Mus musculus GN=Tnip1 PE=1 SV=1 - [D3Z2W0_MOUSE]	1.7	3	1	1	2	646	72.893	6.30322
F6UY44	Cullin-3 (Fragment) OS=Mus musculus GN=Cul3 PE=1 SV=1 - [F6UY44_MOUSE]	11.71	3	1	1	1	111	12.6056	9.48096
A2A543	Voltage-dependent L-type calcium channel subunit beta-1 OS=Mus musculus GN=Cacnb1 PE=1 SV=1 - [A2A543_MOUSE]	7.54	10	2	4	6	597	65.4419	6.62451
H7BX46	Rho GTPase-activating protein 39 OS=Mus musculus GN=Arhgap39 PE=1 SV=1 - [H7BX46_MOUSE]	1.48	3	1	1	2	1078	121.602	7.51807
D3Z7V4	Small G protein-signaling modulator 1 OS=Mus musculus GN=Sgsm1 PE=1 SV=1 - [D3Z7V4_MOUSE]	4.73	4	2	2	2	677	76.3434	7.56201
E0CZE0	NEDD8-activating enzyme E1 regulatory subunit OS=Mus musculus GN=Nae1 PE=1 SV=1 - [E0CZE0_MOUSE]	1.96	2	1	1	1	510	57.5835	5.84619
G3X9Y1	Synaptotagmin III, isoform CRA_a OS=Mus musculus GN=Syt3 PE=1 SV=1 - [G3X9Y1_MOUSE]	3.07	2	1	1	1	587	63.2056	6.62451
Q3TDT0	Tripartite motif-containing protein 3 OS=Mus musculus GN=Trim3 PE=1 SV=1 - [Q3TDT0_MOUSE]	7.95	3	4	4	9	717	78.2226	8.1626
Q792Z1	MCG140784 OS=Mus musculus GN=Try10 PE=1 SV=1 - [Q792Z1_MOUSE]	4.07	1	1	1	11	246	26.2039	5.8335
Q9D034	Guanine nucleotide-binding protein subunit alpha-13 OS=Mus musculus GN=Gna13 PE=1 SV=1 - [Q9D034_MOUSE]	16.76	4	2	3	6	173	19.9243	9.26123
Q5RL57	A kinase (PRKA) anchor protein 8-like OS=Mus musculus GN=Akap8l PE=1 SV=1 - [Q5RL57_MOUSE]	5.77	2	2	2	2	641	71.2554	5.05908
Q792Y8	MCG15081 OS=Mus musculus GN=Gm10334 PE=3 SV=1 - [Q792Y8_MOUSE]	22.36	6	3	3	33	246	26.1017	4.91943
G5E843	Roundabout homolog 1 OS=Mus musculus GN=Robo1 PE=1 SV=1 - [G5E843_MOUSE]	1.99	2	2	2	2	1612	176.265	6.18896
G5E919	NEDD8-conjugating enzyme Ubc12 OS=Mus musculus GN=Ube2m PE=1 SV=1 - [G5E919_MOUSE]	12.79	4	1	1	4	86	10.0961	5.37646
Q3TYJ3	Cytoplasmic dynein 1 intermediate chain 1 OS=Mus musculus GN=Dync1i1 PE=1 SV=1 - [Q3TYJ3_MOUSE]	17.18	2	1	6	51	617	69.5821	5.08447
H6TMF5	cAMP-dependent protein kinase catalytic subunit beta (Fragment) OS=Mus musculus GN=Prkacb PE=1 SV=1 - [H6TMF5_MOUSE]	13.76	2	1	2	3	189	22.5174	7.6499
Q3U422	NADH dehydrogenase [ubiquinone] flavoprotein 3, mitochondrial OS=Mus musculus GN=Ndufv3 PE=1 SV=1 - [Q3U422_MOUSE]	17.31	1	3	3	10	468	50.4681	8.96826
A0A0U1RPU8	Protein tweety homolog OS=Mus musculus GN=Ttyh1 PE=1 SV=1 - [A0A0U1RPU8_MOUSE]	6.21	2	2	2	6	354	38.8818	4.69092
A0A0H2UKB7	Intraflagellar transport protein 22 homolog (Fragment) OS=Mus musculus GN=Ift22 PE=1 SV=1 - [A0A0H2UKB7_MOUSE]	35.05	4	1	1	3	97	10.526	4.71631
A0A0A6YVV6	Regulator of G-protein-signaling 7 (Fragment) OS=Mus musculus GN=Rgs7 PE=1 SV=1 - [A0A0A6YVV6_MOUSE]	15.49	6	1	1	4	71	8.32327	9.84717
F6YBV1	CCR4-NOT transcription complex subunit 3 (Fragment) OS=Mus musculus GN=Cnot3 PE=1 SV=1 - [F6YBV1_MOUSE]	5.88	2	2	2	2	340	37.5758	5.89697
E9Q5Z7	FRAS1-related extracellular matrix protein 1 OS=Mus musculus GN=Frem1 PE=1 SV=1 - [E9Q5Z7_MOUSE]	0.51	2	1	1	1	2173	242.532	6.39209
K3W4Q9	Golgi-associated PDZ and coiled-coil motif-containing protein OS=Mus musculus GN=Gopc PE=1 SV=1 - [K3W4Q9_MOUSE]	5.18	2	1	1	2	463	50.6049	6.354
Q5SX46	Mitochondrial 2-oxoglutarate/malate carrier protein (Fragment) OS=Mus musculus GN=Slc25a11 PE=1 SV=1 - [Q5SX46_MOUSE]	13.99	2	2	2	3	193	20.8019	9.5835
E9PWN3	Isoleucine--tRNA ligase, mitochondrial OS=Mus musculus GN=Iars2 PE=1 SV=1 - [E9PWN3_MOUSE]	3.04	3	1	1	3	560	62.3927	8.79248
F6UT94	WD repeat-containing protein 26 (Fragment) OS=Mus musculus GN=Wdr26 PE=1 SV=1 - [F6UT94_MOUSE]	11.67	4	1	1	1	120	13.5496	7.18115
V9GX31	Peptidyl-prolyl cis-trans isomerase OS=Mus musculus GN=Gm12728 PE=1 SV=1 - [V9GX31_MOUSE]	50.65	2	1	2	35	77	8.55516	4.88135
A0A087WSS1	Protein 2310035C23Rik OS=Mus musculus GN=2310035C23Rik PE=1 SV=1 - [A0A087WSS1_MOUSE]	3.44	5	3	3	4	1192	131.792	5.2876
G3UWN4	Phospholipase DDHD1 (Fragment) OS=Mus musculus GN=Ddhd1 PE=1 SV=1 - [G3UWN4_MOUSE]	12.18	5	1	1	1	156	17.683	9.42236
D3YYH8	Protein Prdm15 (Fragment) OS=Mus musculus GN=Prdm15 PE=1 SV=1 - [D3YYH8_MOUSE]	16.95	5	1	1	2	59	6.69006	4.34814
G3UZH4	Kazrin (Fragment) OS=Mus musculus GN=Kazn PE=1 SV=1 - [G3UZH4_MOUSE]	4.96	6	1	1	1	242	26.9607	8.98291
A2AGR1	MAP kinase-activating death domain protein OS=Mus musculus GN=Madd PE=1 SV=1 - [A2AGR1_MOUSE]	2.51	15	2	2	6	1475	163.194	6.45557
P60867	40S ribosomal protein S20 OS=Mus musculus GN=Rps20 PE=1 SV=1 - [RS20_MOUSE]	36.13	1	3	3	3	119	13.3643	9.93506
P60603	Reactive oxygen species modulator 1 OS=Mus musculus GN=Romo1 PE=2 SV=1 - [ROMO1_MOUSE]	30.38	1	1	1	1	79	8.17686	9.33447
P84104	Serine/arginine-rich splicing factor 3 OS=Mus musculus GN=Srsf3 PE=1 SV=1 - [SRSF3_MOUSE]	5.49	1	1	1	2	164	19.3179	11.6489
P60766	Cell division control protein 42 homolog OS=Mus musculus GN=Cdc42 PE=1 SV=2 - [CDC42_MOUSE]	20.94	1	4	4	13	191	21.245	6.55127
P12023	Amyloid beta A4 protein OS=Mus musculus GN=App PE=1 SV=3 - [A4_MOUSE]	7.53	1	4	4	8	770	86.667	4.79248
Q80VW7	AT-hook-containing transcription factor OS=Mus musculus GN=Akna PE=1 SV=1 - [AKNA_MOUSE]	0.64	1	1	1	1	1404	153.03	6.18896
P50428	Arylsulfatase A OS=Mus musculus GN=Arsa PE=1 SV=2 - [ARSA_MOUSE]	14.82	2	4	4	9	506	53.7137	5.87158
Q8BH66	Atlastin-1 OS=Mus musculus GN=Atl1 PE=1 SV=1 - [ATLA1_MOUSE]	3.58	1	1	1	1	558	63.3373	6.49365
Q64444	Carbonic anhydrase 4 OS=Mus musculus GN=Ca4 PE=1 SV=1 - [CAH4_MOUSE]	17.05	2	3	3	4	305	34.3295	8.20654
P23242	Gap junction alpha-1 protein OS=Mus musculus GN=Gja1 PE=1 SV=2 - [CXA1_MOUSE]	18.06	1	3	3	12	382	42.9769	8.76318
P42125	Enoyl-CoA delta isomerase 1, mitochondrial OS=Mus musculus GN=Eci1 PE=1 SV=2 - [ECI1_MOUSE]	5.19	1	1	1	8	289	32.2298	8.98291
Q9R062	Glycogenin-1 OS=Mus musculus GN=Gyg1 PE=1 SV=3 - [GLYG_MOUSE]	6.31	3	2	2	2	333	37.3783	5.2876
Q61625	Glutamate receptor ionotropic, delta-2 OS=Mus musculus GN=Grid2 PE=1 SV=1 - [GRID2_MOUSE]	1.89	1	1	1	1	1007	113.01	6.1001
Q9WUM3	Coronin-1B OS=Mus musculus GN=Coro1b PE=1 SV=1 - [COR1B_MOUSE]	21.07	1	4	4	22	484	53.878	5.78271
P17665	Cytochrome c oxidase subunit 7C, mitochondrial OS=Mus musculus GN=Cox7c PE=1 SV=1 - [COX7C_MOUSE]	31.75	1	1	1	1	63	7.32788	11.0044
Q6RUT7	Protein CCSMST1 OS=Mus musculus GN=Ccsmst1 PE=1 SV=1 - [CSMT1_MOUSE]	18.38	1	1	1	1	136	15.3387	4.93213
Q8CIQ7	Dedicator of cytokinesis protein 3 OS=Mus musculus GN=Dock3 PE=1 SV=1 - [DOCK3_MOUSE]	0.84	2	1	1	1	2027	232.76	6.99072
Q9QYI5	DnaJ homolog subfamily B member 2 OS=Mus musculus GN=Dnajb2 PE=1 SV=2 - [DNJB2_MOUSE]	11.91	2	1	1	4	277	30.596	4.98291
Q921I9	Exosome complex component RRP41 OS=Mus musculus GN=Exosc4 PE=1 SV=3 - [EXOS4_MOUSE]	8.98	1	1	1	1	245	26.2333	6.15088
Q8QZS1	3-hydroxyisobutyryl-CoA hydrolase, mitochondrial OS=Mus musculus GN=Hibch PE=1 SV=1 - [HIBCH_MOUSE]	11.43	2	4	4	5	385	43.0102	8.06006
Q61189	Methylosome subunit pICln OS=Mus musculus GN=Clns1a PE=1 SV=1 - [ICLN_MOUSE]	18.64	2	2	2	8	236	26.0049	4.11963
O35678	Monoglyceride lipase OS=Mus musculus GN=Mgll PE=1 SV=1 - [MGLL_MOUSE]	8.58	4	2	2	4	303	33.366	7.15186
Q63912	Oligodendrocyte-myelin glycoprotein OS=Mus musculus GN=Omg PE=1 SV=1 - [OMGP_MOUSE]	7.27	2	2	2	14	440	49.252	8.41162
Q8K2C7	Protein OS-9 OS=Mus musculus GN=Os9 PE=1 SV=2 - [OS9_MOUSE]	4.32	1	2	2	2	672	76.061	4.84326
Q8BW96	Calcium/calmodulin-dependent protein kinase type 1D OS=Mus musculus GN=Camk1d PE=1 SV=2 - [KCC1D_MOUSE]	3.9	1	2	2	2	385	42.8917	7.1665
Q6ZQ58	La-related protein 1 OS=Mus musculus GN=Larp1 PE=1 SV=3 - [LARP1_MOUSE]	3.92	2	2	2	2	1072	121.05	8.79248
Q8BJS7	Microtubule-associated protein 10 OS=Mus musculus GN=Map10 PE=1 SV=1 - [MAP10_MOUSE]	1.57	1	1	1	1	891	96.0958	7.38623
Q6PCZ4	Melanoma-associated antigen E1 OS=Mus musculus GN=Magee1 PE=1 SV=1 - [MAGE1_MOUSE]	1.85	1	1	1	2	918	101.568	6.66846
Q9QZ23	NFU1 iron-sulfur cluster scaffold homolog, mitochondrial OS=Mus musculus GN=Nfu1 PE=1 SV=2 - [NFU1_MOUSE]	34.12	3	5	5	9	255	28.5494	5.03369
Q69ZP3	Probable hydrolase PNKD OS=Mus musculus GN=Pnkd PE=1 SV=2 - [PNKD_MOUSE]	6.23	1	1	1	2	385	42.99	8.93896
Q8BX10	Serine/threonine-protein phosphatase PGAM5, mitochondrial OS=Mus musculus GN=Pgam5 PE=1 SV=1 - [PGAM5_MOUSE]	9.38	1	2	2	2	288	31.9746	9.0415
Q3V0K9	Plastin-1 OS=Mus musculus GN=Pls1 PE=1 SV=1 - [PLSI_MOUSE]	2.06	1	1	1	2	630	70.3634	5.37646
Q8K4R4	Cytoplasmic phosphatidylinositol transfer protein 1 OS=Mus musculus GN=Pitpnc1 PE=1 SV=1 - [PITC1_MOUSE]	9.64	2	2	2	3	332	38.3592	6.31592
Q9D0W5	Peptidyl-prolyl cis-trans isomerase-like 1 OS=Mus musculus GN=Ppil1 PE=1 SV=1 - [PPIL1_MOUSE]	10.24	1	1	1	1	166	18.2251	7.98682
Q9JII2	Prolactin-5A1 OS=Mus musculus GN=Prl5a1 PE=2 SV=1 - [PR5A1_MOUSE]	12.17	1	1	1	2	230	26.5387	9.17334
Q9CR00	26S proteasome non-ATPase regulatory subunit 9 OS=Mus musculus GN=Psmd9 PE=1 SV=1 - [PSMD9_MOUSE]	33.78	2	6	6	28	222	24.7046	6.43018
Q64674	Spermidine synthase OS=Mus musculus GN=Srm PE=1 SV=1 - [SPEE_MOUSE]	10.93	1	4	4	4	302	33.9728	5.50342
Q8BP92	Reticulocalbin-2 OS=Mus musculus GN=Rcn2 PE=1 SV=1 - [RCN2_MOUSE]	11.25	1	2	2	4	320	37.2478	4.42432
P14148	60S ribosomal protein L7 OS=Mus musculus GN=Rpl7 PE=1 SV=2 - [RL7_MOUSE]	7.04	2	2	2	3	270	31.3998	10.8872
Q9DCT5	Stromal cell-derived factor 2 OS=Mus musculus GN=Sdf2 PE=1 SV=1 - [SDF2_MOUSE]	11.37	2	1	1	6	211	23.1444	7.32764
Q8K2P7	Sodium-coupled neutral amino acid transporter 1 OS=Mus musculus GN=Slc38a1 PE=1 SV=1 - [S38A1_MOUSE]	5.15	1	1	1	1	485	53.7601	7.07861
P16014	Secretogranin-1 OS=Mus musculus GN=Chgb PE=1 SV=2 - [SCG1_MOUSE]	5.17	1	2	2	7	677	77.9223	5.07178
D3YXK2	Scaffold attachment factor B1 OS=Mus musculus GN=Safb PE=1 SV=2 - [SAFB1_MOUSE]	4.48	2	4	4	11	937	105.04	5.35107
Q923A2	Protein Spindly OS=Mus musculus GN=Spdl1 PE=1 SV=2 - [SPDLY_MOUSE]	2.14	1	1	1	1	608	70.1929	5.99854
P56873	Sjoegren syndrome/scleroderma autoantigen 1 homolog OS=Mus musculus GN=Sssca1 PE=1 SV=1 - [SSA27_MOUSE]	23.12	1	2	2	5	199	21.3226	5.12256
Q91YJ2	Sorting nexin-4 OS=Mus musculus GN=Snx4 PE=1 SV=1 - [SNX4_MOUSE]	3.56	1	1	1	1	450	51.7451	5.79541
P32921	Tryptophan--tRNA ligase, cytoplasmic OS=Mus musculus GN=Wars PE=1 SV=2 - [SYWC_MOUSE]	14.35	1	7	7	12	481	54.3231	6.88818
Q6Y685	Transforming acidic coiled-coil-containing protein 1 OS=Mus musculus GN=Tacc1 PE=1 SV=1 - [TACC1_MOUSE]	8.53	6	3	3	3	774	83.8997	5.03369
Q9D0I9	Arginine--tRNA ligase, cytoplasmic OS=Mus musculus GN=Rars PE=1 SV=2 - [SYRC_MOUSE]	7.12	1	3	3	9	660	75.6251	7.54736
P21981	Protein-glutamine gamma-glutamyltransferase 2 OS=Mus musculus GN=Tgm2 PE=1 SV=4 - [TGM2_MOUSE]	2.19	1	1	1	1	686	77.0123	5.09717
P70362	Ubiquitin fusion degradation protein 1 homolog OS=Mus musculus GN=Ufd1l PE=1 SV=2 - [UFD1_MOUSE]	7.17	1	1	1	1	307	34.4593	6.69775
A0A0R4J1K4	Anion exchange protein OS=Mus musculus GN=Slc4a2 PE=1 SV=1 - [A0A0R4J1K4_MOUSE]	1.64	4	1	1	1	1223	135.352	6.07471
A0A1B0GRB5	Nuclear pore complex protein Nup98-Nup96 OS=Mus musculus GN=Nup98 PE=1 SV=1 - [A0A1B0GRB5_MOUSE]	1.76	6	1	1	1	967	101.193	6.94678
E9Q242	Adenylosuccinate lyase OS=Mus musculus GN=Adsl PE=1 SV=1 - [E9Q242_MOUSE]	4.69	2	1	1	2	469	53.0959	7.26904
F6Z9T5	R3H domain-containing protein 2 (Fragment) OS=Mus musculus GN=R3hdm2 PE=1 SV=1 - [F6Z9T5_MOUSE]	3.23	4	1	1	1	743	79.9515	8.88037
F6TRJ8	Coiled-coil domain-containing protein 85A (Fragment) OS=Mus musculus GN=Ccdc85a PE=1 SV=1 - [F6TRJ8_MOUSE]	10.42	3	1	1	1	144	15.9556	6.26514
D3YUP9	Disintegrin and metalloproteinase domain-containing protein 22 OS=Mus musculus GN=Adam22 PE=1 SV=1 - [D3YUP9_MOUSE]	10.14	13	5	5	6	897	99.4947	7.82568
F8WI90	Neuronal proto-oncogene tyrosine-protein kinase Src OS=Mus musculus GN=Src PE=1 SV=1 - [F8WI90_MOUSE]	2.99	2	1	1	1	535	59.853	7.41553
A2AQ17	Complex I intermediate-associated protein 30, mitochondrial OS=Mus musculus GN=Ndufaf1 PE=1 SV=1 - [A2AQ17_MOUSE]	5.79	3	1	1	1	328	37.7592	8.60205
Q921K2	Poly [ADP-ribose] polymerase OS=Mus musculus GN=Parp1 PE=1 SV=1 - [Q921K2_MOUSE]	3.06	1	1	1	1	1014	112.65	8.95361
Q6NZD2	Sorting nexin 1 OS=Mus musculus GN=Snx1 PE=1 SV=1 - [Q6NZD2_MOUSE]	9.98	3	4	4	8	521	58.8426	5.26221
Q6AXH6	Abi2 protein OS=Mus musculus GN=Abi2 PE=1 SV=1 - [Q6AXH6_MOUSE]	20.63	9	7	8	10	480	52.8072	6.02393
Q3U8Y1	28S ribosomal protein S11, mitochondrial OS=Mus musculus GN=Mrps11 PE=1 SV=1 - [Q3U8Y1_MOUSE]	10.47	2	1	1	1	191	20.2386	10.9458
Q3UXS0	Secretory carrier-associated membrane protein 3 OS=Mus musculus GN=Scamp3 PE=1 SV=1 - [Q3UXS0_MOUSE]	12.86	3	2	2	3	350	38.5614	7.63525
D6RHQ8	IQ motif and SEC7 domain-containing protein 3 OS=Mus musculus GN=Iqsec3 PE=1 SV=1 - [D6RHQ8_MOUSE]	8.06	3	1	1	1	211	22.6636	6.59521
B7XG49	Golgi-associated Rab2B interactor-like 4 OS=Mus musculus GN=Fam71a PE=2 SV=1 - [B7XG49_MOUSE]	5.13	1	1	1	1	585	64.1913	9.48096
B0LM42	Protein Gm21992 OS=Mus musculus GN=Gm21992 PE=1 SV=1 - [B0LM42_MOUSE]	13.1	5	1	2	6	336	36.7589	8.54346
A0A0J9YVH9	Phosphoserine phosphatase (Fragment) OS=Mus musculus GN=Psph PE=1 SV=1 - [A0A0J9YVH9_MOUSE]	24.78	3	2	2	2	113	12.5705	6.771
A2AS44	Plakophilin-4 (Fragment) OS=Mus musculus GN=Pkp4 PE=1 SV=1 - [A2AS44_MOUSE]	8.09	5	3	3	8	803	88.0599	8.08936
E0CXN7	KIF1-binding protein OS=Mus musculus GN=Kif1bp PE=1 SV=1 - [E0CXN7_MOUSE]	13.31	3	1	1	1	293	33.2686	5.63037
A2AJK8	Tetratricopeptide repeat protein 1 OS=Mus musculus GN=Ttc1 PE=1 SV=1 - [A2AJK8_MOUSE]	4	2	1	1	2	250	28.5356	4.93213
F6UK66	Coiled-coil domain-containing protein 50 (Fragment) OS=Mus musculus GN=Ccdc50 PE=1 SV=1 - [F6UK66_MOUSE]	10.55	2	2	2	2	256	29.7761	6.66846
D3Z2F7	Actin-related protein 2/3 complex subunit 3 OS=Mus musculus GN=Arpc3 PE=1 SV=1 - [D3Z2F7_MOUSE]	15.53	5	2	2	3	161	18.6704	8.79248
D3YZY5	Dihydroorotate dehydrogenase (quinone), mitochondrial (Fragment) OS=Mus musculus GN=Dhodh PE=1 SV=1 - [D3YZY5_MOUSE]	11.65	4	1	1	1	103	11.32	8.68994
A0A0A6YY72	Inosine-5'-monophosphate dehydrogenase 2 (Fragment) OS=Mus musculus GN=Impdh2 PE=1 SV=1 - [A0A0A6YY72_MOUSE]	15.31	2	2	2	2	320	34.1076	8.79248
D3YWK1	WD repeat domain phosphoinositide-interacting protein 2 OS=Mus musculus GN=Wipi2 PE=1 SV=1 - [D3YWK1_MOUSE]	9.41	2	2	2	3	425	46.4051	5.84619
D3YWA4	PEST proteolytic signal-containing nuclear protein OS=Mus musculus GN=Pcnp PE=1 SV=1 - [D3YWA4_MOUSE]	47.75	4	3	3	7	111	12.089	9.0415
A0A0J9YUL1	Eukaryotic translation initiation factor 4 gamma 1 (Fragment) OS=Mus musculus GN=Eif4g1 PE=1 SV=1 - [A0A0J9YUL1_MOUSE]	41.86	13	2	2	2	129	13.3327	5.17334
E9PZS4	NHP2-like protein 1 OS=Mus musculus GN=Nhp2l1 PE=1 SV=1 - [E9PZS4_MOUSE]	31.91	2	2	2	4	47	5.14464	8.80713
P60229	Eukaryotic translation initiation factor 3 subunit E OS=Mus musculus GN=Eif3e PE=1 SV=1 - [EIF3E_MOUSE]	4.27	1	1	1	1	445	52.1874	6.03662
P62242	40S ribosomal protein S8 OS=Mus musculus GN=Rps8 PE=1 SV=2 - [RS8_MOUSE]	37.5	1	7	7	26	208	24.1902	10.3159
Q99L13	3-hydroxyisobutyrate dehydrogenase, mitochondrial OS=Mus musculus GN=Hibadh PE=1 SV=1 - [3HIDH_MOUSE]	57.31	1	8	8	27	335	35.4166	8.1333
Q99PU5	Long-chain-fatty-acid--CoA ligase ACSBG1 OS=Mus musculus GN=Acsbg1 PE=1 SV=1 - [ACBG1_MOUSE]	12.34	3	6	6	19	721	80.3745	5.93506
Q9Z103	Activity-dependent neuroprotector homeobox protein OS=Mus musculus GN=Adnp PE=1 SV=2 - [ADNP_MOUSE]	0.99	1	1	1	1	1108	124.229	6.85889
Q9CZS1	Aldehyde dehydrogenase X, mitochondrial OS=Mus musculus GN=Aldh1b1 PE=1 SV=1 - [AL1B1_MOUSE]	10.6	1	4	4	5	519	57.5165	7.02002
P56376	Acylphosphatase-1 OS=Mus musculus GN=Acyp1 PE=1 SV=2 - [ACYP1_MOUSE]	23.23	2	2	2	4	99	11.2338	9.0415
B2RUJ5	Amyloid beta A4 precursor protein-binding family A member 1 OS=Mus musculus GN=Apba1 PE=1 SV=2 - [APBA1_MOUSE]	4.04	1	2	3	4	842	92.8514	4.88135
Q8CG76	Aflatoxin B1 aldehyde reductase member 2 OS=Mus musculus GN=Akr7a2 PE=1 SV=3 - [ARK72_MOUSE]	19.89	1	5	5	5	367	40.5862	8.11865
P56382	ATP synthase subunit epsilon, mitochondrial OS=Mus musculus GN=Atp5e PE=1 SV=2 - [ATP5E_MOUSE]	48.08	1	3	3	6	52	5.83415	10.0083
Q08331	Calretinin OS=Mus musculus GN=Calb2 PE=1 SV=3 - [CALB2_MOUSE]	36.53	1	7	8	35	271	31.3525	5.021
Q9Z0M3	Cadherin-20 OS=Mus musculus GN=Cdh20 PE=2 SV=1 - [CAD20_MOUSE]	2.12	1	1	1	1	801	88.9418	4.71631
P46414	Cyclin-dependent kinase inhibitor 1B OS=Mus musculus GN=Cdkn1b PE=1 SV=2 - [CDN1B_MOUSE]	8.63	1	2	2	8	197	22.1797	7.02002
Q9CZR8	Elongation factor Ts, mitochondrial OS=Mus musculus GN=Tsfm PE=1 SV=1 - [EFTS_MOUSE]	15.12	1	3	3	14	324	35.3121	7.06396
Q3UHD2	Glucose-fructose oxidoreductase domain-containing protein 1 OS=Mus musculus GN=Gfod1 PE=1 SV=1 - [GFOD1_MOUSE]	3.85	1	1	1	1	390	43.258	5.92236
Q3ULJ0	Glycerol-3-phosphate dehydrogenase 1-like protein OS=Mus musculus GN=Gpd1l PE=1 SV=2 - [GPD1L_MOUSE]	17.38	2	3	4	7	351	38.2009	6.771
Q8C0P5	Coronin-2A OS=Mus musculus GN=Coro2a PE=2 SV=1 - [COR2A_MOUSE]	2.29	2	1	1	1	524	59.5352	7.7085
Q8BGD8	Cytochrome c oxidase assembly factor 6 homolog OS=Mus musculus GN=Coa6 PE=1 SV=1 - [COA6_MOUSE]	30.38	1	2	2	7	79	9.29235	8.1626
Q6WQJ1	Sn1-specific diacylglycerol lipase alpha OS=Mus musculus GN=Dagla PE=1 SV=2 - [DGLA_MOUSE]	2.11	1	1	1	1	1044	115.301	6.41748
Q8BVG4	Dipeptidyl peptidase 9 OS=Mus musculus GN=Dpp9 PE=1 SV=2 - [DPP9_MOUSE]	2.78	1	1	1	1	862	97.9389	6.65381
Q03137	Ephrin type-A receptor 4 OS=Mus musculus GN=Epha4 PE=1 SV=2 - [EPHA4_MOUSE]	4.26	1	2	2	4	986	109.744	6.50732
Q8BFZ9	Erlin-2 OS=Mus musculus GN=Erlin2 PE=1 SV=1 - [ERLN2_MOUSE]	7.65	1	1	1	1	340	37.8485	5.50342
P20934	Protein EVI2A OS=Mus musculus GN=Evi2a PE=1 SV=2 - [EVI2A_MOUSE]	9.42	1	2	2	3	223	24.0723	9.5249
Q9CRA9	FGFR1 oncogene partner 2 homolog OS=Mus musculus GN=Fgfr1op2 PE=1 SV=1 - [FGOP2_MOUSE]	12.65	2	2	2	2	253	29.3559	5.8335
P34152	Focal adhesion kinase 1 OS=Mus musculus GN=Ptk2 PE=1 SV=3 - [FAK1_MOUSE]	2.57	1	1	1	1	1090	123.458	6.68311
Q9CR59	Growth arrest and DNA damage-inducible proteins-interacting protein 1 OS=Mus musculus GN=Gadd45gip1 PE=1 SV=1 - [G45IP_MOUSE]	9.91	1	2	2	3	222	25.8044	10.272
P36916	Guanine nucleotide-binding protein-like 1 OS=Mus musculus GN=Gnl1 PE=1 SV=4 - [GNL1_MOUSE]	9.88	1	5	5	7	607	68.7286	5.68115
Q8VDM6	Heterogeneous nuclear ribonucleoprotein U-like protein 1 OS=Mus musculus GN=Hnrnpul1 PE=1 SV=1 - [HNRL1_MOUSE]	3.14	1	1	1	1	859	95.9425	6.58057
Q9JMG7	Hepatoma-derived growth factor-related protein 3 OS=Mus musculus GN=Hdgfrp3 PE=1 SV=2 - [HDGR3_MOUSE]	6.44	1	1	1	4	202	22.4169	8.39697
Q3THE2	Myosin regulatory light chain 12B OS=Mus musculus GN=Myl12b PE=1 SV=2 - [ML12B_MOUSE]	27.91	4	2	3	9	172	19.7665	4.84326
Q8QZR7	Serine/threonine-protein kinase PDIK1L OS=Mus musculus GN=Pdik1l PE=2 SV=1 - [PDK1L_MOUSE]	2.64	2	1	1	1	341	38.5247	6.87354
P63141	Potassium voltage-gated channel subfamily A member 2 OS=Mus musculus GN=Kcna2 PE=1 SV=1 - [KCNA2_MOUSE]	2.81	1	1	1	2	499	56.6645	4.85596
Q9CX00	IST1 homolog OS=Mus musculus GN=Ist1 PE=1 SV=1 - [IST1_MOUSE]	4.97	1	1	1	1	362	39.4435	5.43994
Q8VCK5	Kelch-like protein 20 OS=Mus musculus GN=Klhl20 PE=2 SV=2 - [KLH20_MOUSE]	6.29	1	1	1	2	604	67.3688	6.87354
Q8K274	Ketosamine-3-kinase OS=Mus musculus GN=Fn3krp PE=1 SV=2 - [KT3K_MOUSE]	5.5	1	1	1	1	309	34.4463	7.86963
Q9R226	KH domain-containing, RNA-binding, signal transduction-associated protein 3 OS=Mus musculus GN=Khdrbs3 PE=1 SV=1 - [KHDR3_MOUSE]	2.31	1	1	1	1	346	38.7836	8.104
A2AHG0	Leucine zipper putative tumor suppressor 3 OS=Mus musculus GN=Lzts3 PE=1 SV=1 - [LZTS3_MOUSE]	8.71	1	3	3	4	700	74.9397	6.99072
Q14BB9	MAP6 domain-containing protein 1 OS=Mus musculus GN=Map6d1 PE=1 SV=1 - [MA6D1_MOUSE]	41.88	1	5	5	30	191	20.4202	9.87646
P26041	Moesin OS=Mus musculus GN=Msn PE=1 SV=3 - [MOES_MOUSE]	7.11	3	2	4	6	577	67.7249	6.59521
A2AQ14	Protein Mis18-beta OS=Mus musculus GN=Oip5 PE=2 SV=1 - [MS18B_MOUSE]	6.64	1	1	1	1	241	26.8437	8.47021
Q9Z2D0	Myotubularin-related protein 9 OS=Mus musculus GN=Mtmr9 PE=1 SV=2 - [MTMR9_MOUSE]	1.65	1	1	1	1	545	62.8679	6.62451
Q9EPN1	Neurobeachin OS=Mus musculus GN=Nbea PE=1 SV=1 - [NBEA_MOUSE]	1.33	1	2	2	3	2936	326.536	6.20166
Q9JKL4	NADH dehydrogenase [ubiquinone] 1 alpha subcomplex assembly factor 3 OS=Mus musculus GN=Ndufaf3 PE=1 SV=1 - [NDUF3_MOUSE]	36.22	2	3	3	26	185	20.7205	8.04541
Q9CQ45	Neudesin OS=Mus musculus GN=Nenf PE=1 SV=1 - [NENF_MOUSE]	15.2	1	1	1	1	171	18.8927	5.2749
Q8VCE6	5'(3')-deoxyribonucleotidase, mitochondrial OS=Mus musculus GN=Nt5m PE=1 SV=1 - [NT5M_MOUSE]	15	1	2	2	2	220	25.5861	8.35303
Q8R4R6	Nucleoporin NUP53 OS=Mus musculus GN=Nup35 PE=1 SV=2 - [NUP53_MOUSE]	10.15	2	2	2	2	325	34.7635	9.24658
Q9JJY3	Sphingomyelin phosphodiesterase 3 OS=Mus musculus GN=Smpd3 PE=1 SV=1 - [NSMA2_MOUSE]	3.36	1	1	1	1	655	71.152	5.88428
Q922H2	[Pyruvate dehydrogenase (acetyl-transferring)] kinase isozyme 3, mitochondrial OS=Mus musculus GN=Pdk3 PE=1 SV=1 - [PDK3_MOUSE]	3.61	1	1	1	1	415	47.8926	8.82178
Q3TCN2	Putative phospholipase B-like 2 OS=Mus musculus GN=Plbd2 PE=1 SV=2 - [PLBL2_MOUSE]	7.58	1	3	3	5	594	66.2472	6.12549
Q91XF0	Pyridoxine-5'-phosphate oxidase OS=Mus musculus GN=Pnpo PE=1 SV=1 - [PNPO_MOUSE]	24.9	1	4	4	5	261	30.0949	8.22119
Q8BVT6	Protein phosphatase 2C-like domain-containing protein 1 OS=Mus musculus GN=Pp2d1 PE=2 SV=1 - [PP2D1_MOUSE]	3.71	1	1	1	1	620	70.5856	8.86572
Q3UYC0	Protein phosphatase 1H OS=Mus musculus GN=Ppm1h PE=1 SV=1 - [PPM1H_MOUSE]	6.82	5	3	3	3	513	56.3447	6.72705
Q8K1R3	Polyribonucleotide nucleotidyltransferase 1, mitochondrial OS=Mus musculus GN=Pnpt1 PE=1 SV=1 - [PNPT1_MOUSE]	1.79	1	1	1	1	783	85.6284	8.03076
Q61136	Serine/threonine-protein kinase PRP4 homolog OS=Mus musculus GN=Prpf4b PE=1 SV=3 - [PRP4B_MOUSE]	1.59	1	1	1	1	1007	116.904	10.228
Q8BHH2	Ras-related protein Rab-9B OS=Mus musculus GN=Rab9b PE=1 SV=1 - [RAB9B_MOUSE]	6.97	1	1	1	1	201	22.69	4.93213
A2ALU4	Protein Shroom2 OS=Mus musculus GN=Shroom2 PE=1 SV=1 - [SHRM2_MOUSE]	0.74	2	1	1	1	1481	164.602	6.69775
Q5XJV7	SET domain-containing protein 5 OS=Mus musculus GN=Setd5 PE=1 SV=2 - [SETD5_MOUSE]	3.33	1	1	1	1	1441	157.329	8.38232
Q9CQD1	Ras-related protein Rab-5A OS=Mus musculus GN=Rab5a PE=1 SV=1 - [RAB5A_MOUSE]	8.84	1	1	1	2	215	23.5838	8.14795
Q61411	GTPase HRas OS=Mus musculus GN=Hras PE=1 SV=2 - [RASH_MOUSE]	60.32	7	4	8	27	189	21.2846	5.31299
O54916	RalBP1-associated Eps domain-containing protein 1 OS=Mus musculus GN=Reps1 PE=1 SV=2 - [REPS1_MOUSE]	7.3	6	3	3	4	795	86.4662	5.57959
P27659	60S ribosomal protein L3 OS=Mus musculus GN=Rpl3 PE=1 SV=3 - [RL3_MOUSE]	10.17	1	3	3	4	403	46.0808	10.2134
Q99KR6	E3 ubiquitin-protein ligase RNF34 OS=Mus musculus GN=Rnf34 PE=1 SV=1 - [RNF34_MOUSE]	4.79	1	1	1	1	376	42.0027	4.84326
Q9D7M8	DNA-directed RNA polymerase II subunit RPB4 OS=Mus musculus GN=Polr2d PE=1 SV=2 - [RPB4_MOUSE]	7.75	1	1	1	1	142	16.3011	4.79248
Q80UP8	Sodium-dependent phosphate transporter 2 OS=Mus musculus GN=Slc20a2 PE=1 SV=2 - [S20A2_MOUSE]	4.27	1	1	1	1	656	70.8203	6.48096
Q9CWK8	Sorting nexin-2 OS=Mus musculus GN=Snx2 PE=1 SV=2 - [SNX2_MOUSE]	15.22	1	5	5	5	519	58.4348	5.12256
Q99KH8	Serine/threonine-protein kinase 24 OS=Mus musculus GN=Stk24 PE=1 SV=1 - [STK24_MOUSE]	8.12	1	2	2	2	431	47.9236	5.42725
Q68FL6	Methionine--tRNA ligase, cytoplasmic OS=Mus musculus GN=Mars PE=1 SV=1 - [SYMC_MOUSE]	3.99	2	2	2	4	902	101.366	7.13721
Q8K3D3	DNA repair protein SWI5 homolog OS=Mus musculus GN=Swi5 PE=1 SV=1 - [SWI5_MOUSE]	19.1	2	1	1	10	89	10.2542	4.76709
O35857	Mitochondrial import inner membrane translocase subunit TIM44 OS=Mus musculus GN=Timm44 PE=1 SV=2 - [TIM44_MOUSE]	9.51	1	3	3	3	452	51.0593	8.1333
Q80ZW2	Protein THEM6 OS=Mus musculus GN=Them6 PE=1 SV=1 - [THEM6_MOUSE]	4.35	1	1	1	1	207	23.7876	9.11475
Q8BKI2	Trinucleotide repeat-containing gene 6B protein OS=Mus musculus GN=Tnrc6b PE=1 SV=2 - [TNR6B_MOUSE]	1.99	1	1	1	1	1810	191.845	6.30322
Q9CQU0	Thioredoxin domain-containing protein 12 OS=Mus musculus GN=Txndc12 PE=1 SV=1 - [TXD12_MOUSE]	16.47	1	2	2	3	170	19.0365	5.26221
Q9Z0P5	Twinfilin-2 OS=Mus musculus GN=Twf2 PE=1 SV=1 - [TWF2_MOUSE]	14.61	1	3	3	4	349	39.4464	6.80029
Q3UE37	Ubiquitin-conjugating enzyme E2 Z OS=Mus musculus GN=Ube2z PE=1 SV=2 - [UBE2Z_MOUSE]	2.81	1	1	1	1	356	38.3436	5.61768
Q9D0B5	Thiosulfate sulfurtransferase/rhodanese-like domain-containing protein 3 OS=Mus musculus GN=Tstd3 PE=1 SV=1 - [TSTD3_MOUSE]	8.92	1	1	1	1	157	17.2599	8.1333
Q9Z2R6	Protein unc-119 homolog A OS=Mus musculus GN=Unc119 PE=1 SV=1 - [U119A_MOUSE]	16.67	2	2	2	2	240	26.9934	6.15088
Q8K0T7	Protein unc-13 homolog C OS=Mus musculus GN=Unc13c PE=1 SV=3 - [UN13C_MOUSE]	1.04	1	1	1	1	2210	249.687	6.07471
Q91YR1	Twinfilin-1 OS=Mus musculus GN=Twf1 PE=1 SV=2 - [TWF1_MOUSE]	13.71	1	3	3	5	350	40.0545	6.66846
Q9CR51	V-type proton ATPase subunit G 1 OS=Mus musculus GN=Atp6v1g1 PE=1 SV=3 - [VATG1_MOUSE]	32.2	1	3	3	3	118	13.716	7.97217
Q9R1Z8	Vinexin OS=Mus musculus GN=Sorbs3 PE=1 SV=1 - [VINEX_MOUSE]	1.36	1	1	1	1	733	82.2984	9.20264
Q8BH43	Wiskott-Aldrich syndrome protein family member 2 OS=Mus musculus GN=Wasf2 PE=1 SV=1 - [WASF2_MOUSE]	7.24	2	2	2	3	497	54.04	5.52881
Q8VHI6	Wiskott-Aldrich syndrome protein family member 3 OS=Mus musculus GN=Wasf3 PE=1 SV=1 - [WASF3_MOUSE]	8.78	1	3	3	11	501	55.1696	6.3667
Q8VCM3	Zinc finger FYVE domain-containing protein 21 OS=Mus musculus GN=Zfyve21 PE=1 SV=2 - [ZFY21_MOUSE]	17.52	1	2	2	2	234	26.0298	8.33838
A0A0J9YUF8	Cytospin-B OS=Mus musculus GN=Specc1 PE=1 SV=1 - [A0A0J9YUF8_MOUSE]	6.4	5	3	3	5	781	86.6258	5.80811
E9Q8S5	Microtubule-associated serine/threonine-protein kinase 3 OS=Mus musculus GN=Mast3 PE=1 SV=1 - [E9Q8S5_MOUSE]	2.45	2	1	1	1	1305	142.462	8.646
E9QK04	Neogenin OS=Mus musculus GN=Neo1 PE=1 SV=1 - [E9QK04_MOUSE]	1.41	2	1	1	3	1492	162.818	6.49365
E9Q543	Folate receptor alpha (Fragment) OS=Mus musculus GN=Folr1 PE=1 SV=8 - [E9Q543_MOUSE]	16.03	3	1	1	1	156	18.4025	6.88818
D3Z1R6	Cytoplasmic polyadenylation element-binding protein 3 OS=Mus musculus GN=Cpeb3 PE=1 SV=1 - [D3Z1R6_MOUSE]	4.96	11	1	2	2	685	74.6416	6.771
B1AWC9	Phosphodiesterase OS=Mus musculus GN=Pde4b PE=1 SV=1 - [B1AWC9_MOUSE]	10.46	9	3	3	3	736	83.2489	5.26221
D3Z5F0	Cdc42 effector protein 5 (Fragment) OS=Mus musculus GN=Cdc42ep5 PE=1 SV=1 - [D3Z5F0_MOUSE]	16.46	2	1	1	1	79	8.0542	10.2427
E9Q7H6	Threonine--tRNA ligase, mitochondrial OS=Mus musculus GN=Tars2 PE=1 SV=1 - [E9Q7H6_MOUSE]	2.49	3	1	1	1	642	72.5161	7.79639
D3YZV2	Potassium voltage-gated channel subfamily C member 3 OS=Mus musculus GN=Kcnc3 PE=1 SV=1 - [D3YZV2_MOUSE]	4.03	7	2	2	4	769	81.8933	6.97607
E9Q7G0	Protein Numa1 OS=Mus musculus GN=Numa1 PE=1 SV=1 - [E9Q7G0_MOUSE]	2.91	2	3	3	4	2094	235.487	5.87158
A0A087WNP6	Protein CDV3 OS=Mus musculus GN=Cdv3 PE=1 SV=1 - [A0A087WNP6_MOUSE]	40.85	5	6	6	32	235	24.1816	5.85889
A0A0A6YX02	Ragulator complex protein LAMTOR1 OS=Mus musculus GN=Lamtor1 PE=1 SV=1 - [A0A0A6YX02_MOUSE]	26.06	2	2	2	4	142	15.7287	5.45264
A2AQW6	Pre-mRNA-processing factor 40 homolog A (Fragment) OS=Mus musculus GN=Prpf40a PE=1 SV=2 - [A2AQW6_MOUSE]	19	3	1	1	1	100	10.7409	9.30518
S4R2J8	Bridging integrator 2 OS=Mus musculus GN=Bin2 PE=1 SV=1 - [S4R2J8_MOUSE]	4.65	4	1	3	8	473	50.8606	4.88135
D3YWC9	MTSS1-like protein OS=Mus musculus GN=Mtss1l PE=1 SV=1 - [D3YWC9_MOUSE]	4.75	2	1	1	1	653	70.0412	7.29834
E9QAZ2	Ribosomal protein L15 OS=Mus musculus GN=Gm10020 PE=3 SV=1 - [E9QAZ2_MOUSE]	3.43	2	1	1	1	204	24.062	11.5757
E9PWA1	Splicing factor U2AF 26 kDa subunit (Fragment) OS=Mus musculus GN=U2af1l4 PE=1 SV=2 - [E9PWA1_MOUSE]	8.57	8	1	1	2	105	12.2639	8.98291
S4R169	Zinc transporter 3 OS=Mus musculus GN=Slc30a3 PE=1 SV=1 - [S4R169_MOUSE]	7.67	2	1	1	1	339	36.6756	6.55127
D3YWX2	YLP motif-containing protein 1 OS=Mus musculus GN=Ylpm1 PE=1 SV=2 - [D3YWX2_MOUSE]	2.81	4	3	3	4	2139	240.901	6.68311
G3UXL2	Protein Prps1l3 OS=Mus musculus GN=Prps1l3 PE=3 SV=1 - [G3UXL2_MOUSE]	16.04	4	3	3	3	318	34.8019	6.97607
Z4YK03	Leukocyte elastase inhibitor A OS=Mus musculus GN=Serpinb1a PE=1 SV=1 - [Z4YK03_MOUSE]	10.34	2	3	3	5	348	39.0241	6.65381
F8VPK5	Rho-associated protein kinase OS=Mus musculus GN=Rock2 PE=1 SV=1 - [F8VPK5_MOUSE]	2.23	3	2	2	2	1388	160.515	5.98584
G3X8P9	Aldehyde oxidase 1 OS=Mus musculus GN=Aox1 PE=1 SV=1 - [G3X8P9_MOUSE]	1.5	2	1	1	1	1333	146.554	6.93213
G3X9V4	Glutamate receptor ionotropic, NMDA 2B OS=Mus musculus GN=Grin2b PE=1 SV=1 - [G3X9V4_MOUSE]	1.35	2	1	1	1	1482	165.887	6.87354
B1ATI9	Growth arrest-specific protein 7 OS=Mus musculus GN=Gas7 PE=1 SV=1 - [B1ATI9_MOUSE]	10.92	3	4	4	6	412	47.2317	7.59131
Q5SUH7	Clathrin interactor 1 OS=Mus musculus GN=Clint1 PE=1 SV=1 - [Q5SUH7_MOUSE]	2.25	3	1	1	1	623	67.6876	6.41748
A0A0R4J0I1	MCG1051009 OS=Mus musculus GN=Serpina3k PE=1 SV=1 - [A0A0R4J0I1_MOUSE]	13.64	2	4	4	13	418	46.6429	5.16064
Q6P6L6	Gem (Nuclear organelle) associated protein 4 OS=Mus musculus GN=Gemin4 PE=1 SV=1 - [Q6P6L6_MOUSE]	2.17	1	1	1	1	1058	120.101	5.14795
I7HLV2	60S ribosomal protein L10 (Fragment) OS=Mus musculus GN=Rpl10 PE=1 SV=1 - [I7HLV2_MOUSE]	11.94	4	2	2	2	201	23.0571	10.0083
A0A076FR46	KCC2a-S25 variant 1 OS=Mus musculus GN=Slc12a5 PE=1 SV=1 - [A0A076FR46_MOUSE]	2.82	2	3	5	19	1133	125.518	6.88818
Q8C373	Cancer-related nucleoside-triphosphatase homolog OS=Mus musculus GN=Ntpcr PE=1 SV=1 - [Q8C373_MOUSE]	14.05	3	1	1	1	121	13.1277	6.52197
D3YXG6	Actin-related protein 2/3 complex subunit 2 OS=Mus musculus GN=Arpc2 PE=1 SV=1 - [D3YXG6_MOUSE]	15.14	2	3	3	3	284	32.4925	8.01611
Q6PRU9	HemK methyltransferase family member 2, isoform CRA_a OS=Mus musculus GN=N6amt1 PE=1 SV=1 - [Q6PRU9_MOUSE]	15.22	4	1	1	1	138	14.6756	5.21143
A0A087WPL1	PDZ and LIM domain protein 2 OS=Mus musculus GN=Pdlim2 PE=1 SV=1 - [A0A087WPL1_MOUSE]	25	3	1	1	1	128	14.243	9.18799
D3YWY6	Mitochondrial pyruvate carrier OS=Mus musculus GN=Mpc1 PE=1 SV=1 - [D3YWY6_MOUSE]	24.71	5	2	2	2	85	9.7319	9.39307
A0A0G2JGP4	GTPase NRas (Fragment) OS=Mus musculus GN=Nras PE=1 SV=1 - [A0A0G2JGP4_MOUSE]	45.36	9	3	7	22	183	20.5732	5.17334
A2A6Q3	Cdc42 effector protein 4 (Fragment) OS=Mus musculus GN=Cdc42ep4 PE=1 SV=1 - [A2A6Q3_MOUSE]	20.93	3	1	1	2	86	9.42084	9.979
H3BLB1	Phosphoethanolamine/phosphocholine phosphatase (Fragment) OS=Mus musculus GN=Phospho1 PE=1 SV=1 - [H3BLB1_MOUSE]	5.76	2	1	1	1	191	21.2146	8.07471
F6RK07	Disabled homolog 2-interacting protein (Fragment) OS=Mus musculus GN=Dab2ip PE=1 SV=1 - [F6RK07_MOUSE]	1.57	5	1	1	1	1083	119.565	7.07861
A2BFF8	Cytoplasmic dynein 1 intermediate chain 2 OS=Mus musculus GN=Dync1i2 PE=1 SV=1 - [A2BFF8_MOUSE]	12.93	5	3	3	17	611	68.2236	5.2876
A2BGG7	Nuclease-sensitive element-binding protein 1 (Fragment) OS=Mus musculus GN=Ybx1 PE=1 SV=1 - [A2BGG7_MOUSE]	13.55	2	1	1	1	214	24.726	10.0962
H3BJY3	Active breakpoint cluster region-related protein (Fragment) OS=Mus musculus GN=Abr PE=1 SV=1 - [H3BJY3_MOUSE]	22.6	3	3	3	3	146	16.5206	8.104
D3YYT0	Cadherin-2 OS=Mus musculus GN=Cdh2 PE=1 SV=1 - [D3YYT0_MOUSE]	7.07	2	3	3	13	849	93.7992	4.76709
D3YZA1	Chromatin target of PRMT1 protein (Fragment) OS=Mus musculus GN=Chtop PE=1 SV=8 - [D3YZA1_MOUSE]	10.57	4	1	1	3	123	13.4385	12.6011
Q6PDM2	Serine/arginine-rich splicing factor 1 OS=Mus musculus GN=Srsf1 PE=1 SV=3 - [SRSF1_MOUSE]	15.32	2	3	3	8	248	27.7278	10.3599
P62141	Serine/threonine-protein phosphatase PP1-beta catalytic subunit OS=Mus musculus GN=Ppp1cb PE=1 SV=3 - [PP1B_MOUSE]	13.46	6	1	3	4	327	37.1626	6.18896
Q9ESW4	Acylglycerol kinase, mitochondrial OS=Mus musculus GN=Agk PE=1 SV=1 - [AGK_MOUSE]	8.31	2	2	2	5	421	46.9463	8.39697
Q9CQR4	Acyl-coenzyme A thioesterase 13 OS=Mus musculus GN=Acot13 PE=1 SV=1 - [ACO13_MOUSE]	47.14	1	6	6	21	140	15.1729	8.82178
Q66L44	Voltage-dependent calcium channel beta subunit-associated regulatory protein OS=Mus musculus GN=Cbarp PE=1 SV=4 - [CBARP_MOUSE]	2.01	2	1	1	1	698	74.0856	6.32861
Q9D832	DnaJ homolog subfamily B member 4 OS=Mus musculus GN=Dnajb4 PE=1 SV=1 - [DNJB4_MOUSE]	5.93	1	2	2	2	337	37.7582	8.5874
Q9ESB3	Histidine-rich glycoprotein OS=Mus musculus GN=Hrg PE=1 SV=2 - [HRG_MOUSE]	2.86	2	1	1	1	525	59.1256	7.66455
Q80U63	Mitofusin-2 OS=Mus musculus GN=Mfn2 PE=1 SV=3 - [MFN2_MOUSE]	3.96	1	2	2	2	757	86.1328	6.771
O35685	Nuclear migration protein nudC OS=Mus musculus GN=Nudc PE=1 SV=1 - [NUDC_MOUSE]	4.82	1	1	1	1	332	38.3343	5.26221
Q8R0G9	Nuclear pore complex protein Nup133 OS=Mus musculus GN=Nup133 PE=1 SV=2 - [NU133_MOUSE]	0.87	1	1	1	1	1155	128.539	5.19873
Q8K0T4	Katanin p60 ATPase-containing subunit A-like 1 OS=Mus musculus GN=Katnal1 PE=1 SV=1 - [KATL1_MOUSE]	3.69	1	1	1	1	488	55.1303	7.09326
Q9CQ19	Myosin regulatory light polypeptide 9 OS=Mus musculus GN=Myl9 PE=1 SV=3 - [MYL9_MOUSE]	16.28	3	1	2	4	172	19.8415	4.91943
P29595	NEDD8 OS=Mus musculus GN=Nedd8 PE=1 SV=2 - [NEDD8_MOUSE]	23.46	1	1	1	4	81	8.96687	7.25439
A2AJT4	Arginine/serine-rich protein PNISR OS=Mus musculus GN=Pnisr PE=1 SV=1 - [PNISR_MOUSE]	3.6	2	1	1	1	805	92.0598	10.0083
P53994	Ras-related protein Rab-2A OS=Mus musculus GN=Rab2a PE=1 SV=1 - [RAB2A_MOUSE]	12.74	3	2	2	3	212	23.5328	6.53662
Q9EPQ7	StAR-related lipid transfer protein 5 OS=Mus musculus GN=Stard5 PE=1 SV=2 - [STAR5_MOUSE]	5.16	1	1	1	1	213	23.9067	6.39209
Q9CZW5	Mitochondrial import receptor subunit TOM70 OS=Mus musculus GN=Tomm70 PE=1 SV=2 - [TOM70_MOUSE]	4.42	1	2	2	3	611	67.5469	7.53271
P70460	Vasodilator-stimulated phosphoprotein OS=Mus musculus GN=Vasp PE=1 SV=4 - [VASP_MOUSE]	7.73	1	2	2	3	375	39.6419	8.52881
Q0VAW7	Zinc finger protein 112 OS=Mus musculus GN=Znf112 PE=2 SV=2 - [ZN112_MOUSE]	3.07	1	1	1	1	879	98.4467	8.11865
A2AJI1	MAP7 domain-containing protein 1 OS=Mus musculus GN=Map7d1 PE=1 SV=1 - [A2AJI1_MOUSE]	5.68	4	2	2	4	774	85.7126	9.94971
F6YL88	UV excision repair protein RAD23 homolog A (Fragment) OS=Mus musculus GN=Rad23a PE=1 SV=1 - [F6YL88_MOUSE]	20.41	4	1	1	4	147	16.3371	4.25928
D3YTR7	Adenylyl cyclase-associated protein OS=Mus musculus GN=Cap2 PE=1 SV=1 - [D3YTR7_MOUSE]	14.29	2	4	4	20	364	39.8522	5.60498
D6RDD4	GDNF family receptor alpha-1 OS=Mus musculus GN=Gfra1 PE=1 SV=1 - [D6RDD4_MOUSE]	3.1	2	1	1	1	419	47.1887	8.01611
G3X9C6	5-hydroxytryptamine (Serotonin) receptor 5B OS=Mus musculus GN=Htr5b PE=3 SV=1 - [G3X9C6_MOUSE]	11.89	2	1	1	1	370	41.2028	9.84717
Q3TCD4	Enoyl-CoA delta isomerase 2, mitochondrial OS=Mus musculus GN=Eci2 PE=1 SV=1 - [Q3TCD4_MOUSE]	11.9	8	3	3	5	378	41.7533	8.73389
Q91Y09	Protein Pcdhac2 OS=Mus musculus GN=Pcdhac2 PE=1 SV=1 - [Q91Y09_MOUSE]	1.79	1	1	1	1	1006	109.425	5.46533
A0A0G2JFZ4	MCG8104 OS=Mus musculus GN=Tsc22d2 PE=1 SV=1 - [A0A0G2JFZ4_MOUSE]	2.42	2	1	1	1	745	75.3246	4.84326
D3YWR8	Protein 1110059G10Rik OS=Mus musculus GN=1110059G10Rik PE=1 SV=1 - [D3YWR8_MOUSE]	34.78	2	1	1	1	46	5.43779	9.59814
A0A0N4SUN5	Nuclear receptor-interacting protein 2 (Fragment) OS=Mus musculus GN=Nrip2 PE=4 SV=1 - [A0A0N4SUN5_MOUSE]	17.89	4	3	3	3	190	20.9779	8.20654
G3UYM3	Serine/threonine-protein kinase LATS2 (Fragment) OS=Mus musculus GN=Lats2 PE=4 SV=1 - [G3UYM3_MOUSE]	11.11	4	1	1	1	288	32.0745	9.40771
S4R1H9	E3 ubiquitin-protein ligase RNF181 (Fragment) OS=Mus musculus GN=Rnf181 PE=1 SV=1 - [S4R1H9_MOUSE]	90.32	7	2	2	3	31	3.73972	5.17334
F6SJC5	Tetratricopeptide repeat protein 23-like (Fragment) OS=Mus musculus GN=Ttc23l PE=1 SV=1 - [F6SJC5_MOUSE]	17.88	2	1	1	1	179	19.7839	6.17627
D3Z795	Proteasome assembly chaperone 1 OS=Mus musculus GN=Psmg1 PE=1 SV=1 - [D3Z795_MOUSE]	12.31	2	2	2	2	268	30.5205	7.12256
A2AI62	Hephaestin OS=Mus musculus GN=Heph PE=1 SV=1 - [A2AI62_MOUSE]	3.9	2	1	1	1	847	95.0765	6.07471
O35593	26S proteasome non-ATPase regulatory subunit 14 OS=Mus musculus GN=Psmd14 PE=1 SV=2 - [PSDE_MOUSE]	4.19	1	1	1	2	310	34.5546	6.52197
P62307	Small nuclear ribonucleoprotein F OS=Mus musculus GN=Snrpf PE=1 SV=1 - [RUXF_MOUSE]	24.42	1	1	1	4	86	9.71878	4.66553
Q8VE70	Programmed cell death protein 10 OS=Mus musculus GN=Pdcd10 PE=1 SV=1 - [PDC10_MOUSE]	15.09	3	2	2	2	212	24.6999	8.19189
P61514	60S ribosomal protein L37a OS=Mus musculus GN=Rpl37a PE=1 SV=2 - [RL37A_MOUSE]	19.57	1	1	1	1	92	10.2685	10.4331
P62862	40S ribosomal protein S30 OS=Mus musculus GN=Fau PE=1 SV=1 - [RS30_MOUSE]	18.64	2	2	2	5	59	6.64382	12.147
Q8VED9	Galectin-related protein OS=Mus musculus GN=Lgalsl PE=1 SV=1 - [LEGL_MOUSE]	39.53	2	4	4	9	172	18.9436	5.35107
Q8R4H2	Rho guanine nucleotide exchange factor 12 OS=Mus musculus GN=Arhgef12 PE=1 SV=2 - [ARHGC_MOUSE]	0.97	2	1	1	1	1543	172.242	5.74463
P08030	Adenine phosphoribosyltransferase OS=Mus musculus GN=Aprt PE=1 SV=2 - [APT_MOUSE]	18.33	1	2	2	2	180	19.7115	6.78564
Q3TYD4	Arylsulfatase G OS=Mus musculus GN=Arsg PE=2 SV=1 - [ARSG_MOUSE]	3.81	1	1	1	1	525	57.3974	6.39209
O08997	Copper transport protein ATOX1 OS=Mus musculus GN=Atox1 PE=1 SV=1 - [ATOX1_MOUSE]	42.65	1	2	2	3	68	7.33366	6.50732
Q8VBX0	Ankyrin repeat and SOCS box protein 13 OS=Mus musculus GN=Asb13 PE=2 SV=1 - [ASB13_MOUSE]	8.63	1	1	1	1	278	29.877	6.66846
Q9R069	Basal cell adhesion molecule OS=Mus musculus GN=Bcam PE=1 SV=1 - [BCAM_MOUSE]	2.89	1	1	1	1	622	67.6276	6.25244
Q9D6W8	BLOC-1-related complex subunit 6 OS=Mus musculus GN=Borcs6 PE=1 SV=1 - [BORC6_MOUSE]	14.17	1	2	2	2	360	37.988	5.33838
Q9CY64	Biliverdin reductase A OS=Mus musculus GN=Blvra PE=1 SV=1 - [BIEA_MOUSE]	4.41	1	1	1	1	295	33.5035	7.02002
Q60865	Caprin-1 OS=Mus musculus GN=Caprin1 PE=1 SV=2 - [CAPR1_MOUSE]	11.03	1	5	5	13	707	78.1208	5.24951
Q9CQP3	Coiled-coil-helix-coiled-coil-helix domain-containing protein 5 OS=Mus musculus GN=Chchd5 PE=1 SV=1 - [CHCH5_MOUSE]	10.91	1	1	1	1	110	12.3179	7.31299
Q8K327	Chromosome alignment-maintaining phosphoprotein 1 OS=Mus musculus GN=Champ1 PE=1 SV=1 - [CHAP1_MOUSE]	2.12	1	1	1	1	802	87.5058	7.85498
P17809	Solute carrier family 2, facilitated glucose transporter member 1 OS=Mus musculus GN=Slc2a1 PE=1 SV=4 - [GTR1_MOUSE]	2.03	1	1	1	3	492	53.9495	8.86572
Q9CQE8	UPF0568 protein C14orf166 homolog OS=Mus musculus PE=1 SV=1 - [CN166_MOUSE]	11.89	1	1	1	1	244	28.1348	6.88818
Q9D2V7	Coronin-7 OS=Mus musculus GN=Coro7 PE=1 SV=2 - [CORO7_MOUSE]	8.46	3	3	3	6	922	100.749	5.77002
Q5M8N4	Epimerase family protein SDR39U1 OS=Mus musculus GN=Sdr39u1 PE=1 SV=1 - [D39U1_MOUSE]	9.09	1	3	3	11	308	32.9743	8.90967
Q9D824	Pre-mRNA 3'-end-processing factor FIP1 OS=Mus musculus GN=Fip1l1 PE=1 SV=1 - [FIP1_MOUSE]	6.88	2	2	2	4	581	64.92	5.77002
B1AXV0	DOMON domain-containing protein FRRS1L OS=Mus musculus GN=Frrs1l PE=1 SV=1 - [FRS1L_MOUSE]	6.14	1	1	1	2	293	32.4859	5.42725
O70433	Four and a half LIM domains protein 2 OS=Mus musculus GN=Fhl2 PE=1 SV=1 - [FHL2_MOUSE]	13.26	1	2	2	2	279	32.0505	7.29834
Q8JZK9	Hydroxymethylglutaryl-CoA synthase, cytoplasmic OS=Mus musculus GN=Hmgcs1 PE=1 SV=1 - [HMCS1_MOUSE]	2.5	1	1	1	1	520	57.5325	5.98584
Q9ESM3	Hyaluronan and proteoglycan link protein 2 OS=Mus musculus GN=Hapln2 PE=1 SV=1 - [HPLN2_MOUSE]	5.87	1	1	1	4	341	37.9012	9.08545
Q60872	Eukaryotic translation initiation factor 1A OS=Mus musculus GN=Eif1a PE=2 SV=3 - [IF1A_MOUSE]	22.22	2	2	2	2	144	16.4922	5.23682
P59325	Eukaryotic translation initiation factor 5 OS=Mus musculus GN=Eif5 PE=1 SV=1 - [IF5_MOUSE]	4.43	1	2	2	6	429	48.9377	5.51611
Q8R3Y8	Interferon regulatory factor 2-binding protein 1 OS=Mus musculus GN=Irf2bp1 PE=1 SV=2 - [I2BP1_MOUSE]	2.23	1	1	1	3	584	61.712	8.17725
P01872	Ig mu chain C region OS=Mus musculus GN=Ighm PE=1 SV=2 - [IGHM_MOUSE]	5.95	3	2	2	4	454	49.9403	7.00537
P63250	G protein-activated inward rectifier potassium channel 1 OS=Mus musculus GN=Kcnj3 PE=1 SV=1 - [KCNJ3_MOUSE]	6.79	1	1	1	1	501	56.5367	8.36768
Q9DBS5	Kinesin light chain 4 OS=Mus musculus GN=Klc4 PE=1 SV=1 - [KLC4_MOUSE]	5.98	1	2	2	12	619	68.5706	6.0874
Q8R574	Phosphoribosyl pyrophosphate synthase-associated protein 2 OS=Mus musculus GN=Prpsap2 PE=1 SV=1 - [KPRB_MOUSE]	3.52	1	1	1	1	369	40.8544	7.1665
P68404	Protein kinase C beta type OS=Mus musculus GN=Prkcb PE=1 SV=4 - [KPCB_MOUSE]	8.05	3	3	4	10	671	76.701	7.00537
P26645	Myristoylated alanine-rich C-kinase substrate OS=Mus musculus GN=Marcks PE=1 SV=2 - [MARCS_MOUSE]	3.56	1	2	2	2	309	29.6438	4.33545
P08905	Lysozyme C-2 OS=Mus musculus GN=Lyz2 PE=1 SV=2 - [LYZ2_MOUSE]	31.08	1	2	2	3	148	16.6782	8.80713
Q91X96	Guanine nucleotide exchange factor MSS4 OS=Mus musculus GN=Rabif PE=1 SV=1 - [MSS4_MOUSE]	8.94	1	1	1	3	123	13.9058	5.51611
Q91X91	Nicotinate-nucleotide pyrophosphorylase [carboxylating] OS=Mus musculus GN=Qprt PE=1 SV=1 - [NADC_MOUSE]	5.35	1	1	1	1	299	31.5102	6.7124
Q8BZR9	Nuclear cap-binding protein subunit 3 OS=Mus musculus GN=Ncbp3 PE=1 SV=1 - [NCBP3_MOUSE]	2.11	1	1	1	1	615	70.0001	5.79541
Q9R060	Cytosolic Fe-S cluster assembly factor NUBP1 OS=Mus musculus GN=Nubp1 PE=1 SV=1 - [NUBP1_MOUSE]	6.88	1	1	1	1	320	34.063	5.89697
Q9WVE8	Protein kinase C and casein kinase substrate in neurons protein 2 OS=Mus musculus GN=Pacsin2 PE=1 SV=1 - [PACN2_MOUSE]	6.38	1	2	2	4	486	55.7982	5.19873
O70161	Phosphatidylinositol 4-phosphate 5-kinase type-1 gamma OS=Mus musculus GN=Pip5k1c PE=1 SV=2 - [PI51C_MOUSE]	9.83	6	3	3	6	661	72.3633	5.59229
Q8K411	Presequence protease, mitochondrial OS=Mus musculus GN=Pitrm1 PE=1 SV=1 - [PREP_MOUSE]	2.9	1	2	2	2	1036	117.297	7.1958
Q9DCL9	Multifunctional protein ADE2 OS=Mus musculus GN=Paics PE=1 SV=4 - [PUR6_MOUSE]	7.53	1	2	2	7	425	46.9761	7.2251
Q922U1	U4/U6 small nuclear ribonucleoprotein Prp3 OS=Mus musculus GN=Prpf3 PE=1 SV=1 - [PRPF3_MOUSE]	2.49	1	1	1	1	683	77.4069	9.49561
Q9Z0S9	Prenylated Rab acceptor protein 1 OS=Mus musculus GN=Rabac1 PE=1 SV=1 - [PRAF1_MOUSE]	7.57	2	1	1	1	185	20.6057	7.89893
Q61120	SHC-transforming protein 3 OS=Mus musculus GN=Shc3 PE=1 SV=2 - [SHC3_MOUSE]	5.49	1	1	1	1	474	52.0882	7.29834
Q8VCA8	Secernin-2 OS=Mus musculus GN=Scrn2 PE=1 SV=1 - [SCRN2_MOUSE]	9.41	1	2	2	4	425	46.5712	5.70654
Q9WTM5	RuvB-like 2 OS=Mus musculus GN=Ruvbl2 PE=1 SV=3 - [RUVB2_MOUSE]	16.2	4	4	4	4	463	51.0805	5.64307
O08530	Sphingosine 1-phosphate receptor 1 OS=Mus musculus GN=S1pr1 PE=1 SV=3 - [S1PR1_MOUSE]	3.66	1	1	1	1	382	42.6116	9.42236
Q8K0T0	Reticulon-1 OS=Mus musculus GN=Rtn1 PE=1 SV=1 - [RTN1_MOUSE]	6.28	3	4	4	5	780	83.5206	4.57666
P55012	Solute carrier family 12 member 2 OS=Mus musculus GN=Slc12a2 PE=1 SV=2 - [S12A2_MOUSE]	3.24	2	2	2	2	1205	130.95	7.32764
Q8VCC9	Spondin-1 OS=Mus musculus GN=Spon1 PE=1 SV=1 - [SPON1_MOUSE]	4.09	1	3	3	6	807	90.7614	6.02393
Q5DQR4	Syntaxin-binding protein 5-like OS=Mus musculus GN=Stxbp5l PE=1 SV=1 - [STB5L_MOUSE]	3.97	1	2	2	3	1185	131.76	6.85889
Q3UZP4	Small VCP/p97-interacting protein OS=Mus musculus GN=Svip PE=3 SV=1 - [SVIP_MOUSE]	32.47	1	2	2	6	77	8.35831	8.90967
Q8CGF7	Transcription elongation regulator 1 OS=Mus musculus GN=Tcerg1 PE=1 SV=2 - [TCRG1_MOUSE]	1	1	1	1	1	1100	123.71	8.646
O08583	THO complex subunit 4 OS=Mus musculus GN=Alyref PE=1 SV=3 - [THOC4_MOUSE]	9.8	1	3	3	10	255	26.9236	11.1509
Q9D8Z2	TP53-regulated inhibitor of apoptosis 1 OS=Mus musculus GN=Triap1 PE=1 SV=1 - [TRIA1_MOUSE]	15.79	1	1	1	1	76	8.7501	5.47803
P07146	Anionic trypsin-2 OS=Mus musculus GN=Prss2 PE=1 SV=1 - [TRY2_MOUSE]	6.91	1	1	1	1	246	26.1866	4.62744
Q61037	Tuberin OS=Mus musculus GN=Tsc2 PE=1 SV=1 - [TSC2_MOUSE]	2.54	2	2	2	2	1814	201.943	6.97607
Q8K0G5	Protein TSSC1 OS=Mus musculus GN=Eipr1 PE=1 SV=2 - [TSSC1_MOUSE]	4.4	1	1	1	2	386	43.1	5.13525
Q9EQH3	Vacuolar protein sorting-associated protein 35 OS=Mus musculus GN=Vps35 PE=1 SV=1 - [VPS35_MOUSE]	3.77	1	2	2	4	796	91.6548	5.43994
F6T0L5	Plexin-D1 (Fragment) OS=Mus musculus GN=Plxnd1 PE=1 SV=8 - [F6T0L5_MOUSE]	7.73	2	1	1	1	233	24.8885	7.29834
F7BJK1	Protein Pcdh1 (Fragment) OS=Mus musculus GN=Pcdh1 PE=1 SV=1 - [F7BJK1_MOUSE]	11.61	3	6	6	16	1077	116.448	5.08447
E9Q0V6	NHS-like protein 2 OS=Mus musculus GN=Nhsl2 PE=1 SV=1 - [E9Q0V6_MOUSE]	3.2	3	2	2	2	1219	132.272	8.48486
F8WHM5	Golgi apparatus protein 1 (Fragment) OS=Mus musculus GN=Glg1 PE=1 SV=1 - [F8WHM5_MOUSE]	1.98	4	2	2	2	1163	132.265	6.93213
F6VP19	Protein TANC2 (Fragment) OS=Mus musculus GN=Tanc2 PE=1 SV=1 - [F6VP19_MOUSE]	3.08	2	2	2	2	1137	124.493	8.6167
E9Q8B3	DnaJ homolog subfamily C member 11 OS=Mus musculus GN=Dnajc11 PE=1 SV=1 - [E9Q8B3_MOUSE]	3.48	2	1	1	2	402	45.4853	7.28369
F7C3I9	Protein Afdn (Fragment) OS=Mus musculus GN=Afdn PE=1 SV=1 - [F7C3I9_MOUSE]	10.42	4	1	1	1	355	41.3625	5.05908
E0CZF8	Traf2 and NCK-interacting protein kinase OS=Mus musculus GN=Tnik PE=1 SV=1 - [E0CZF8_MOUSE]	2.44	8	2	2	2	1268	144.164	7.06396
B1ASZ3	Glycerol kinase OS=Mus musculus GN=Gk PE=1 SV=1 - [B1ASZ3_MOUSE]	3.44	3	2	2	6	552	59.7943	5.64307
A0A0J9YUA3	Huntingtin-interacting protein 1 (Fragment) OS=Mus musculus GN=Hip1 PE=1 SV=1 - [A0A0J9YUA3_MOUSE]	2.75	2	1	1	1	618	68.0968	4.99561
D3Z373	BLOC-1-related complex subunit 8 OS=Mus musculus GN=Borcs8 PE=1 SV=1 - [D3Z373_MOUSE]	8.85	2	1	1	3	113	12.6564	6.93213
D3Z6V7	IQ motif and SEC7 domain-containing protein 2 OS=Mus musculus GN=Iqsec2 PE=1 SV=1 - [D3Z6V7_MOUSE]	3.69	5	1	2	2	949	105.136	7.23975
D3YTN1	Importin subunit alpha-3 (Fragment) OS=Mus musculus GN=Kpna4 PE=1 SV=8 - [D3YTN1_MOUSE]	14.41	4	1	1	1	111	12.6675	5.32568
B7ZD63	RNA-binding protein 39 (Fragment) OS=Mus musculus GN=Rbm39 PE=1 SV=1 - [B7ZD63_MOUSE]	6.41	5	1	1	2	156	19.0292	11.4292
E9Q9Q7	Actin-binding LIM protein 1 OS=Mus musculus GN=Ablim1 PE=1 SV=1 - [E9Q9Q7_MOUSE]	6.25	11	2	2	6	400	45.855	8.07471
A0A0J9YTW6	Sodium channel protein OS=Mus musculus GN=Scn2a PE=1 SV=1 - [A0A0J9YTW6_MOUSE]	1.5	3	2	2	6	2006	227.798	5.64307
A0A0G2JGE8	Leucine-rich glioma-inactivated protein 1 OS=Mus musculus GN=Lgi1 PE=1 SV=1 - [A0A0G2JGE8_MOUSE]	2.55	3	1	1	1	509	58.0904	8.1333
Q91V89	Protein Ppp2r5d OS=Mus musculus GN=Ppp2r5d PE=1 SV=1 - [Q91V89_MOUSE]	1.85	1	1	1	1	594	68.9508	7.95752
A0A0R4J2C2	Synaptotagmin II OS=Mus musculus GN=Syt2 PE=1 SV=1 - [A0A0R4J2C2_MOUSE]	7.35	2	2	2	2	422	47.2182	7.98682
A0A0R4IZY9	tRNA-dihydrouridine(47) synthase [NAD(P)(+)] OS=Mus musculus GN=Dus3l PE=1 SV=1 - [A0A0R4IZY9_MOUSE]	5.34	2	2	2	3	637	71.1049	7.89893
E9PVG3	Prefoldin subunit 5 OS=Mus musculus GN=Pfdn5 PE=1 SV=1 - [E9PVG3_MOUSE]	18.82	3	1	1	1	85	9.63398	8.38232
A0A0R4IZY0	Thimet oligopeptidase OS=Mus musculus GN=Thop1 PE=1 SV=1 - [A0A0R4IZY0_MOUSE]	3.2	2	2	2	4	687	77.9772	5.98584
Q60709	Amyloid-like protein 2 OS=Mus musculus GN=Aplp2 PE=1 SV=1 - [Q60709_MOUSE]	4.93	1	2	2	5	751	85.1934	4.729
Q1MX41	Protein kinase C delta type OS=Mus musculus GN=Prkcd PE=1 SV=1 - [Q1MX41_MOUSE]	4.04	5	2	2	4	545	62.7805	8.04541
A2A860	WW domain binding protein 2, isoform CRA_a OS=Mus musculus GN=Wbp2 PE=1 SV=1 - [A2A860_MOUSE]	18.06	2	1	1	2	216	23.2933	6.31592
D3YYZ2	MCG1031578 OS=Mus musculus GN=Gm5239 PE=1 SV=1 - [D3YYZ2_MOUSE]	18.85	1	1	2	4	122	14.0635	9.64209
G3UVU8	MCG7669, isoform CRA_a OS=Mus musculus GN=Supt4a PE=4 SV=1 - [G3UVU8_MOUSE]	36.78	4	2	2	2	87	9.51753	5.32568
Q8BRB6	TBC1 domain family member 24 OS=Mus musculus GN=Tbc1d24 PE=2 SV=1 - [Q8BRB6_MOUSE]	4.62	3	1	1	3	325	36.8831	8.19189
D3Z1F7	Protein 4833439L19Rik OS=Mus musculus GN=4833439L19Rik PE=1 SV=1 - [D3Z1F7_MOUSE]	11.27	5	2	2	2	284	30.8076	9.34912
Q3TFP0	Serine/arginine-rich-splicing factor 10 OS=Mus musculus GN=Srsf10 PE=1 SV=1 - [Q3TFP0_MOUSE]	6.59	2	1	1	2	182	22.1219	10.3306
D6RFR7	DCC-interacting protein 13-beta OS=Mus musculus GN=Appl2 PE=1 SV=1 - [D6RFR7_MOUSE]	14.53	3	1	1	4	117	12.9673	4.70361
F8WHM3	Anion exchange protein 3 OS=Mus musculus GN=Slc4a3 PE=1 SV=1 - [F8WHM3_MOUSE]	3.66	2	1	1	1	573	62.4032	6.56592
A0A0U1RNK1	Periaxin OS=Mus musculus GN=Prx PE=1 SV=1 - [A0A0U1RNK1_MOUSE]	1.44	4	1	1	1	1252	132.247	7.54736
D6RJ20	Aspartoacylase OS=Mus musculus GN=Aspa PE=1 SV=1 - [D6RJ20_MOUSE]	12.26	4	1	1	1	106	11.6119	6.27783
F6TN80	Protein Srsf11 (Fragment) OS=Mus musculus GN=Srsf11 PE=1 SV=1 - [F6TN80_MOUSE]	13.86	6	1	1	4	101	11.0287	6.27783
G3V012	ATP-binding cassette sub-family F member 1 (Fragment) OS=Mus musculus GN=Abcf1 PE=1 SV=1 - [G3V012_MOUSE]	48.84	2	1	1	2	43	4.71943	4.95752
A0A0N4SV96	Beta-chimaerin OS=Mus musculus GN=Chn2 PE=1 SV=1 - [A0A0N4SV96_MOUSE]	5.58	6	1	1	1	197	22.6254	9.01221
E9PXF0	Protein Pcdh17 OS=Mus musculus GN=Pcdh17 PE=1 SV=1 - [E9PXF0_MOUSE]	3.03	1	2	2	2	1157	126.069	5.21143
B1AZS9	Peroxiredoxin-4 (Fragment) OS=Mus musculus GN=Prdx4 PE=1 SV=1 - [B1AZS9_MOUSE]	10.04	2	1	2	8	229	26.3744	5.98584
E9PVS1	Inter-alpha-trypsin inhibitor heavy chain H3 OS=Mus musculus GN=Itih3 PE=1 SV=1 - [E9PVS1_MOUSE]	2.43	2	1	1	2	699	77.9681	6.84424
D3Z0F3	Transcription factor A, mitochondrial (Fragment) OS=Mus musculus GN=Tfam PE=1 SV=1 - [D3Z0F3_MOUSE]	15.38	3	1	1	1	143	16.668	9.90576
F7CJS8	40S ribosomal protein S9 (Fragment) OS=Mus musculus GN=Rps9 PE=1 SV=1 - [F7CJS8_MOUSE]	6.67	4	1	1	1	135	16.1962	10.7993
A0A087WRE7	Hydroxyacid-oxoacid transhydrogenase, mitochondrial (Fragment) OS=Mus musculus GN=Adhfe1 PE=1 SV=1 - [A0A087WRE7_MOUSE]	4.16	2	1	1	1	457	49.1178	7.2251
G3UYW2	Valine--tRNA ligase (Fragment) OS=Mus musculus GN=Vars PE=1 SV=1 - [G3UYW2_MOUSE]	10.4	4	1	1	1	125	13.8455	9.75928
A0A0G2JDX4	Tetraspanin-2 (Fragment) OS=Mus musculus GN=Tspan2 PE=1 SV=1 - [A0A0G2JDX4_MOUSE]	19.54	4	1	1	2	87	9.51582	6.7417
Q91V41	Ras-related protein Rab-14 OS=Mus musculus GN=Rab14 PE=1 SV=3 - [RAB14_MOUSE]	19.53	6	3	4	10	215	23.8819	6.21436
P46656	Adrenodoxin, mitochondrial OS=Mus musculus GN=Fdx1 PE=1 SV=1 - [ADX_MOUSE]	20.21	1	3	3	4	188	20.11	5.61768
O55112	AF4/FMR2 family member 2 OS=Mus musculus GN=Aff2 PE=2 SV=2 - [AFF2_MOUSE]	2.04	1	1	1	1	1272	140.095	8.42627
Q07076	Annexin A7 OS=Mus musculus GN=Anxa7 PE=1 SV=2 - [ANXA7_MOUSE]	12.31	1	6	6	12	463	49.8933	6.17627
Q91WS0	CDGSH iron-sulfur domain-containing protein 1 OS=Mus musculus GN=Cisd1 PE=1 SV=1 - [CISD1_MOUSE]	16.67	1	1	1	8	108	12.0892	9.05615
P56394	Cytochrome c oxidase copper chaperone OS=Mus musculus GN=Cox17 PE=1 SV=2 - [COX17_MOUSE]	9.52	1	1	1	2	63	6.77936	7.69385
Q9Z2I2	Peptidyl-prolyl cis-trans isomerase FKBP1B OS=Mus musculus GN=Fkbp1b PE=1 SV=3 - [FKB1B_MOUSE]	53.7	1	2	2	4	108	11.7901	8.47021
Q99K30	Epidermal growth factor receptor kinase substrate 8-like protein 2 OS=Mus musculus GN=Eps8l2 PE=1 SV=1 - [ES8L2_MOUSE]	4.94	1	2	2	2	729	82.1782	7.18115
Q80VD1	Protein FAM98B OS=Mus musculus GN=Fam98b PE=1 SV=1 - [FA98B_MOUSE]	3.73	2	1	1	1	429	45.3208	8.49951
Q8R0F8	Acylpyruvase FAHD1, mitochondrial OS=Mus musculus GN=Fahd1 PE=1 SV=2 - [FAHD1_MOUSE]	42.73	1	5	5	15	227	25.1559	7.69385
Q60759	Glutaryl-CoA dehydrogenase, mitochondrial OS=Mus musculus GN=Gcdh PE=1 SV=2 - [GCDH_MOUSE]	2.74	2	1	1	1	438	48.5749	8.73389
Q8C129	Leucyl-cystinyl aminopeptidase OS=Mus musculus GN=Lnpep PE=1 SV=1 - [LCAP_MOUSE]	2.05	1	2	2	5	1025	117.229	5.96045
O88735	Ensconsin OS=Mus musculus GN=Map7 PE=1 SV=1 - [MAP7_MOUSE]	1.92	3	2	2	4	730	81.9724	9.36377
O55022	Membrane-associated progesterone receptor component 1 OS=Mus musculus GN=Pgrmc1 PE=1 SV=4 - [PGRC1_MOUSE]	7.69	1	2	2	5	195	21.6808	4.70361
P55258	Ras-related protein Rab-8A OS=Mus musculus GN=Rab8a PE=1 SV=2 - [RAB8A_MOUSE]	13.04	5	1	2	5	207	23.6532	9.0708
Q9Z266	SNARE-associated protein Snapin OS=Mus musculus GN=Snapin PE=1 SV=1 - [SNAPN_MOUSE]	11.03	1	2	2	4	136	14.8949	9.30518
Q9CX34	Protein SGT1 homolog OS=Mus musculus GN=Sugt1 PE=1 SV=3 - [SGT1_MOUSE]	27.08	1	5	5	13	336	38.135	5.45264
Q8R0J7	Vacuolar protein sorting-associated protein 37B OS=Mus musculus GN=Vps37b PE=1 SV=1 - [VP37B_MOUSE]	6.67	1	2	2	3	285	31.0362	7.04932
A0A0R4J083	Long-chain-specific acyl-CoA dehydrogenase, mitochondrial OS=Mus musculus GN=Acadl PE=1 SV=1 - [A0A0R4J083_MOUSE]	4.65	2	1	1	2	430	47.8665	8.14795
A2ASF9	Phosphodiesterase OS=Mus musculus GN=Pde1a PE=1 SV=1 - [A2ASF9_MOUSE]	9.52	6	3	3	4	420	47.8791	6.7417
D3Z0T5	Protein canopy homolog 4 (Fragment) OS=Mus musculus GN=Cnpy4 PE=1 SV=1 - [D3Z0T5_MOUSE]	10	2	1	1	2	160	18.0443	6.55127
B2RXW8	Ppfia1 protein OS=Mus musculus GN=Ppfia1 PE=1 SV=1 - [B2RXW8_MOUSE]	5	2	2	3	3	1241	140.049	6.13818
B8QI34	Liprin-alpha 2 OS=Mus musculus GN=Ppfia2 PE=1 SV=1 - [B8QI34_MOUSE]	3.9	3	2	3	3	1257	143.245	6.11279
B9EKJ3	Mon2 protein OS=Mus musculus GN=Mon2 PE=1 SV=1 - [B9EKJ3_MOUSE]	0.7	2	1	1	1	1709	188.231	6.0874
D3Z2V8	Transport and Golgi organization 2 homolog (Fragment) OS=Mus musculus GN=Tango2 PE=1 SV=8 - [D3Z2V8_MOUSE]	11.11	4	1	1	1	117	13.1976	8.1333
A0A0J9YUY8	Ras GTPase-activating protein-binding protein 2 (Fragment) OS=Mus musculus GN=G3bp2 PE=1 SV=1 - [A0A0J9YUY8_MOUSE]	12.82	3	1	1	1	117	13.1927	8.20654
A0A087WS59	SLIT-ROBO Rho GTPase-activating protein 2 (Fragment) OS=Mus musculus GN=Srgap2 PE=1 SV=1 - [A0A087WS59_MOUSE]	3.1	4	1	1	1	451	50.858	5.2876
A2A9R8	ELAV-like protein OS=Mus musculus GN=Elavl4 PE=1 SV=1 - [A2A9R8_MOUSE]	7.92	10	1	2	3	366	40.3234	9.39307
Q8JZN5	Acyl-CoA dehydrogenase family member 9, mitochondrial OS=Mus musculus GN=Acad9 PE=1 SV=2 - [ACAD9_MOUSE]	4.32	1	1	1	6	625	68.6787	7.45947
P24549	Retinal dehydrogenase 1 OS=Mus musculus GN=Aldh1a1 PE=1 SV=5 - [AL1A1_MOUSE]	14.97	2	6	6	9	501	54.4328	7.79639
Q80WT5	Aftiphilin OS=Mus musculus GN=Aftph PE=1 SV=2 - [AFTIN_MOUSE]	4.51	3	2	2	7	931	101.068	4.50049
P32211	Muscarinic acetylcholine receptor M4 OS=Mus musculus GN=Chrm4 PE=2 SV=1 - [ACM4_MOUSE]	5.43	1	1	1	1	479	52.939	9.87646
Q9D1F4	Proline-rich AKT1 substrate 1 OS=Mus musculus GN=Akt1s1 PE=1 SV=1 - [AKTS1_MOUSE]	31.91	9	4	4	4	257	27.4664	4.71631
A2ARS0	Ankyrin repeat domain-containing protein 63 OS=Mus musculus GN=Ankrd63 PE=1 SV=1 - [ANR63_MOUSE]	12.05	1	2	2	2	390	41.0422	10.8286
Q06335	Amyloid-like protein 2 OS=Mus musculus GN=Aplp2 PE=1 SV=4 - [APLP2_MOUSE]	3.11	1	1	1	1	707	80.4163	4.70361
Q8CI61	BAG family molecular chaperone regulator 4 OS=Mus musculus GN=Bag4 PE=1 SV=2 - [BAG4_MOUSE]	7.22	1	1	1	2	457	49.0642	5.33838
Q8BGH7	CDC42 small effector protein 2 OS=Mus musculus GN=Cdc42se2 PE=1 SV=1 - [C42S2_MOUSE]	25	1	1	1	7	84	9.21734	8.35303
Q80X80	C2 domain-containing protein 2-like OS=Mus musculus GN=C2cd2l PE=1 SV=3 - [C2C2L_MOUSE]	10.34	1	3	3	9	706	76.282	7.21045
Q68EF6	Brain-enriched guanylate kinase-associated protein OS=Mus musculus GN=Begain PE=1 SV=2 - [BEGIN_MOUSE]	12.83	3	4	4	6	600	65.2688	5.87158
P10605	Cathepsin B OS=Mus musculus GN=Ctsb PE=1 SV=2 - [CATB_MOUSE]	5.9	1	1	1	1	339	37.2557	5.90967
O55026	Ectonucleoside triphosphate diphosphohydrolase 2 OS=Mus musculus GN=Entpd2 PE=1 SV=2 - [ENTP2_MOUSE]	3.03	1	1	1	1	495	54.2848	8.36768
P13020	Gelsolin OS=Mus musculus GN=Gsn PE=1 SV=3 - [GELS_MOUSE]	6.15	4	5	5	14	780	85.8881	6.17627
Q9DCZ1	GMP reductase 1 OS=Mus musculus GN=Gmpr PE=1 SV=1 - [GMPR1_MOUSE]	9.86	1	2	2	3	345	37.4578	7.09326
Q8BWS5	G protein-regulated inducer of neurite outgrowth 3 OS=Mus musculus GN=Gprin3 PE=1 SV=1 - [GRIN3_MOUSE]	2.1	1	1	1	1	763	80.4352	7.02002
Q8BWQ4	Cap-specific mRNA (nucleoside-2'-O-)-methyltransferase 2 OS=Mus musculus GN=Cmtr2 PE=2 SV=1 - [CMTR2_MOUSE]	1.56	1	1	1	2	767	87.0857	7.07861
Q8BH50	Uncharacterized protein C18orf25 homolog OS=Mus musculus PE=1 SV=1 - [CR025_MOUSE]	5.71	1	1	1	1	245	26.4297	5.18604
Q921C1	Gap junction gamma-3 protein OS=Mus musculus GN=Gjc3 PE=1 SV=2 - [CXG3_MOUSE]	6.32	1	1	1	1	269	30.2727	8.36768
O54788	DNA fragmentation factor subunit beta OS=Mus musculus GN=Dffb PE=1 SV=1 - [DFFB_MOUSE]	8.43	1	1	1	1	344	39.4239	8.70459
Q7TNV0	Protein DEK OS=Mus musculus GN=Dek PE=1 SV=1 - [DEK_MOUSE]	3.42	1	1	1	2	380	43.132	6.85889
Q9CWQ0	Diphthine methyl ester synthase OS=Mus musculus GN=Dph5 PE=1 SV=2 - [DPH5_MOUSE]	6.76	1	1	1	1	281	31.198	5.2876
Q00558	Factor VIII intron 22 protein OS=Mus musculus GN=F8a1 PE=1 SV=1 - [F8I2_MOUSE]	15.53	2	3	3	4	380	40.4641	6.88818
Q3UXZ6	Protein FAM81A OS=Mus musculus GN=Fam81a PE=1 SV=2 - [FA81A_MOUSE]	3.85	1	1	1	1	364	41.6838	8.74854
Q5F226	Protocadherin Fat 2 OS=Mus musculus GN=Fat2 PE=1 SV=1 - [FAT2_MOUSE]	0.3	1	1	1	1	4351	479.811	5.12256
A2RT62	F-box/LRR-repeat protein 16 OS=Mus musculus GN=Fbxl16 PE=1 SV=1 - [FXL16_MOUSE]	4.8	1	1	1	4	479	51.8446	6.59521
Q91X51	Golgi reassembly-stacking protein 1 OS=Mus musculus GN=Gorasp1 PE=1 SV=3 - [GORS1_MOUSE]	3.14	1	1	1	3	446	46.8527	4.65283
P97825	Hematological and neurological expressed 1 protein OS=Mus musculus GN=Hn1 PE=1 SV=3 - [HN1_MOUSE]	32.47	1	5	5	36	154	16.0708	5.31299
Q8C3I8	Protein HGH1 homolog OS=Mus musculus GN=Hgh1 PE=1 SV=1 - [HGH1_MOUSE]	2.8	1	1	1	1	393	42.8891	4.7417
Q9DB29	Isoamyl acetate-hydrolyzing esterase 1 homolog OS=Mus musculus GN=Iah1 PE=1 SV=1 - [IAH1_MOUSE]	11.65	1	1	1	3	249	27.9562	5.51611
Q3KNY0	Immunoglobulin-like and fibronectin type III domain-containing protein 1 OS=Mus musculus GN=Igfn1 PE=1 SV=3 - [IGFN1_MOUSE]	0.6	1	1	1	1	2849	303.471	6.58057
Q5DTZ0	Protein NYNRIN OS=Mus musculus GN=Nynrin PE=2 SV=2 - [NYNRI_MOUSE]	1.03	1	1	1	1	1840	202.939	6.99072
P01631	Ig kappa chain V-II region 26-10 OS=Mus musculus PE=1 SV=1 - [KV2A7_MOUSE]	38.94	6	2	2	6	113	12.2652	8.88037
Q61092	Laminin subunit gamma-2 OS=Mus musculus GN=Lamc2 PE=1 SV=2 - [LAMC2_MOUSE]	1.01	2	1	1	1	1191	130.077	6.30322
P34884	Macrophage migration inhibitory factor OS=Mus musculus GN=Mif PE=1 SV=2 - [MIF_MOUSE]	42.61	1	5	5	11	115	12.4962	7.34229
O35684	Neuroserpin OS=Mus musculus GN=Serpini1 PE=1 SV=1 - [NEUS_MOUSE]	4.15	1	1	1	1	410	46.318	4.71631
Q9CQ54	NADH dehydrogenase [ubiquinone] 1 subunit C2 OS=Mus musculus GN=Ndufc2 PE=1 SV=1 - [NDUC2_MOUSE]	11.67	1	2	2	4	120	14.1542	9.20264
Q8BG18	N-terminal EF-hand calcium-binding protein 1 OS=Mus musculus GN=Necab1 PE=1 SV=1 - [NECA1_MOUSE]	9.09	1	1	1	1	352	40.9082	4.89404
Q91YP2	Neurolysin, mitochondrial OS=Mus musculus GN=Nln PE=1 SV=1 - [NEUL_MOUSE]	2.41	1	1	1	1	704	80.3775	6.44287
O70310	Glycylpeptide N-tetradecanoyltransferase 1 OS=Mus musculus GN=Nmt1 PE=1 SV=1 - [NMT1_MOUSE]	6.65	1	2	2	5	496	56.8519	8.00146
Q9D0B6	Protein PBDC1 OS=Mus musculus GN=Pbdc1 PE=1 SV=1 - [PBDC1_MOUSE]	5.56	1	1	1	2	198	22.2098	4.55127
Q7TSV4	Phosphoglucomutase-2 OS=Mus musculus GN=Pgm2 PE=1 SV=1 - [PGM2_MOUSE]	2.9	1	1	1	1	620	68.7043	6.13818
Q8K212	Phosphofurin acidic cluster sorting protein 1 OS=Mus musculus GN=Pacs1 PE=1 SV=2 - [PACS1_MOUSE]	6.56	1	3	3	8	961	104.764	7.73779
O89084	cAMP-specific 3',5'-cyclic phosphodiesterase 4A OS=Mus musculus GN=Pde4a PE=1 SV=2 - [PDE4A_MOUSE]	2.96	1	1	1	2	844	93.4992	5.26221
P15327	Bisphosphoglycerate mutase OS=Mus musculus GN=Bpgm PE=1 SV=2 - [PMGE_MOUSE]	7.34	1	1	1	1	259	29.9597	7.06396
Q9JI99	Sphingosine-1-phosphate phosphatase 1 OS=Mus musculus GN=Sgpp1 PE=1 SV=1 - [SGPP1_MOUSE]	6.74	1	1	1	3	430	47.7131	8.00146
Q8BGQ1	Spermatogenesis-defective protein 39 homolog OS=Mus musculus GN=Vipas39 PE=1 SV=1 - [SPE39_MOUSE]	3.87	1	1	1	1	491	56.5901	7.1665
Q63918	Serum deprivation-response protein OS=Mus musculus GN=Sdpr PE=1 SV=3 - [SDPR_MOUSE]	15.31	1	2	2	3	418	46.7354	5.21143
Q9JHG6	Calcipressin-1 OS=Mus musculus GN=Rcan1 PE=1 SV=1 - [RCAN1_MOUSE]	7.58	2	2	2	5	198	22.6915	6.22705
Q9DC04	Regulator of G-protein signaling 3 OS=Mus musculus GN=Rgs3 PE=1 SV=2 - [RGS3_MOUSE]	1.76	1	1	1	1	966	106.153	5.85889
Q9D7N6	39S ribosomal protein L30, mitochondrial OS=Mus musculus GN=Mrpl30 PE=1 SV=1 - [RM30_MOUSE]	26.25	1	2	2	2	160	18.331	10.1548
Q8VDT9	39S ribosomal protein L50, mitochondrial OS=Mus musculus GN=Mrpl50 PE=1 SV=2 - [RM50_MOUSE]	10.69	1	1	1	1	159	18.2016	9.33447
Q9D1M0	Protein SEC13 homolog OS=Mus musculus GN=Sec13 PE=1 SV=3 - [SEC13_MOUSE]	3.42	1	1	1	1	322	35.5431	5.37646
Q8C080	Sorting nexin-16 OS=Mus musculus GN=Snx16 PE=1 SV=2 - [SNX16_MOUSE]	4.07	1	1	1	1	344	38.7934	5.21143
Q8R191	Synaptogyrin-3 OS=Mus musculus GN=Syngr3 PE=1 SV=1 - [SNG3_MOUSE]	5.24	1	1	1	3	229	24.5454	8.17725
O55201	Transcription elongation factor SPT5 OS=Mus musculus GN=Supt5h PE=1 SV=1 - [SPT5H_MOUSE]	1.66	1	1	1	1	1082	120.589	5.04639
Q91YE8	Synaptopodin-2 OS=Mus musculus GN=Synpo2 PE=1 SV=2 - [SYNP2_MOUSE]	3.22	3	2	2	3	1087	116.455	7.37158
P83887	Tubulin gamma-1 chain OS=Mus musculus GN=Tubg1 PE=1 SV=1 - [TBG1_MOUSE]	2	2	1	1	1	451	51.0687	6.02393
P10711	Transcription elongation factor A protein 1 OS=Mus musculus GN=Tcea1 PE=1 SV=2 - [TCEA1_MOUSE]	11.63	2	2	2	2	301	33.859	8.38232
Q921T2	Torsin-1A-interacting protein 1 OS=Mus musculus GN=Tor1aip1 PE=1 SV=3 - [TOIP1_MOUSE]	5.88	4	2	2	5	595	66.7405	7.04932
Q9DC40	Telomere length regulation protein TEL2 homolog OS=Mus musculus GN=Telo2 PE=1 SV=2 - [TELO2_MOUSE]	1.07	1	1	1	1	840	93.2536	5.24951
O55013	Trafficking protein particle complex subunit 3 OS=Mus musculus GN=Trappc3 PE=1 SV=1 - [TPPC3_MOUSE]	4.44	1	1	1	2	180	20.2892	4.95752
Q9CQN1	Heat shock protein 75 kDa, mitochondrial OS=Mus musculus GN=Trap1 PE=1 SV=1 - [TRAP1_MOUSE]	5.24	1	2	3	16	706	80.1585	6.68311
Q8CDN6	Thioredoxin-like protein 1 OS=Mus musculus GN=Txnl1 PE=1 SV=3 - [TXNL1_MOUSE]	17.3	1	3	3	11	289	32.2167	4.95752
Q9CQY6	Ubiquinol-cytochrome-c reductase complex assembly factor 2 OS=Mus musculus GN=Uqcc2 PE=1 SV=1 - [UQCC2_MOUSE]	20.59	1	1	1	6	136	16.3102	9.18799
Q99KC8	von Willebrand factor A domain-containing protein 5A OS=Mus musculus GN=Vwa5a PE=1 SV=2 - [VMA5A_MOUSE]	1.77	1	1	1	5	793	87.0874	6.58057
P63024	Vesicle-associated membrane protein 3 OS=Mus musculus GN=Vamp3 PE=1 SV=1 - [VAMP3_MOUSE]	42.72	1	2	5	20	103	11.473	8.49951
A0A1B0GSY2	Janus kinase and microtubule-interacting protein 3 (Fragment) OS=Mus musculus GN=Jakmip3 PE=1 SV=1 - [A0A1B0GSY2_MOUSE]	1.73	4	1	1	1	462	53.8567	8.104
E9QK20	Voltage-dependent R-type calcium channel subunit alpha OS=Mus musculus GN=Cacna1e PE=1 SV=2 - [E9QK20_MOUSE]	2.04	5	2	3	8	1965	223.016	8.08936
B1AWJ4	Transmembrane protein 8B OS=Mus musculus GN=Tmem8b PE=1 SV=1 - [B1AWJ4_MOUSE]	2.24	1	1	1	1	893	98.0341	8.90967
A0A0R4J094	Fumarylacetoacetate hydrolase domain-containing protein 2A OS=Mus musculus GN=Fahd2a PE=1 SV=1 - [A0A0R4J094_MOUSE]	3.51	2	1	1	5	313	34.6541	8.1626
Z4YMF3	Serine racemase (Fragment) OS=Mus musculus GN=Srr PE=1 SV=1 - [Z4YMF3_MOUSE]	36.75	3	4	4	4	166	18.0083	7.38623
D3YZ21	Protein D430041D05Rik OS=Mus musculus GN=D430041D05Rik PE=1 SV=1 - [D3YZ21_MOUSE]	3.54	2	3	3	6	1414	153.285	9.39307
F2Z490	Diacylglycerol kinase epsilon OS=Mus musculus GN=Dgke PE=1 SV=1 - [F2Z490_MOUSE]	3.2	2	1	1	2	406	46.0492	8.5874
E9PY51	Protein Trappc8 OS=Mus musculus GN=Trappc8 PE=1 SV=1 - [E9PY51_MOUSE]	1.58	2	1	1	2	822	92.9276	7.07861
E9Q1S3	Protein transport protein Sec23A OS=Mus musculus GN=Sec23a PE=1 SV=1 - [E9Q1S3_MOUSE]	1.63	2	1	1	3	736	82.9027	7.45947
K3W4R2	Myosin-14 OS=Mus musculus GN=Myh14 PE=1 SV=1 - [K3W4R2_MOUSE]	2.45	2	2	3	4	2000	228.422	5.57959
A0A0J9YKD4	Creatine kinase M-type OS=Mus musculus GN=Ckm PE=1 SV=1 - [A0A0J9YKD4_MOUSE]	8.01	2	2	2	4	312	35.0859	7.09326
A2AQY8	Kynurenine--oxoglutarate transaminase 1 OS=Mus musculus GN=Kyat1 PE=1 SV=1 - [A2AQY8_MOUSE]	3.48	2	1	1	1	374	42.208	7.53271
D3YTS3	Protein D630045J12Rik OS=Mus musculus GN=D630045J12Rik PE=1 SV=2 - [D3YTS3_MOUSE]	1.56	2	1	1	2	1799	193.875	6.12549
A0A140LJ81	Protein FAM168A OS=Mus musculus GN=Fam168a PE=1 SV=1 - [A0A140LJ81_MOUSE]	20.93	3	1	1	2	129	13.7765	8.14795
A0A0R4J0V4	Junction-mediating and -regulatory protein OS=Mus musculus GN=Jmy PE=1 SV=1 - [A0A0R4J0V4_MOUSE]	1.93	2	1	1	1	983	110.487	6.12549
B1AXE9	Angiomotin (Fragment) OS=Mus musculus GN=Amot PE=1 SV=1 - [B1AXE9_MOUSE]	4.02	2	1	1	1	522	58.1096	8.35303
A0A0U1RPK4	4F2 cell-surface antigen heavy chain OS=Mus musculus GN=Slc3a2 PE=1 SV=1 - [A0A0U1RPK4_MOUSE]	23.1	2	4	4	25	303	33.6723	5.35107
H3BJU7	Rho guanine nucleotide exchange factor 2 OS=Mus musculus GN=Arhgef2 PE=1 SV=1 - [H3BJU7_MOUSE]	6.28	9	3	3	7	956	108.52	6.87354
A0A087WSF0	Histone deacetylase 4 (Fragment) OS=Mus musculus GN=Hdac4 PE=1 SV=1 - [A0A087WSF0_MOUSE]	8.04	2	1	1	1	112	12.7907	6.63916
B1AXZ4	ELAV-like protein OS=Mus musculus GN=Elavl2 PE=1 SV=1 - [B1AXZ4_MOUSE]	5.93	7	1	2	3	388	42.5046	9.0415
A0A0R4J1B9	28S ribosomal protein S29, mitochondrial OS=Mus musculus GN=Dap3 PE=1 SV=1 - [A0A0R4J1B9_MOUSE]	5.19	3	1	1	2	366	42.0968	8.95361
A0A0U1RPW2	Tight junction protein ZO-1 OS=Mus musculus GN=Tjp1 PE=1 SV=1 - [A0A0U1RPW2_MOUSE]	3.28	3	2	2	6	1128	127.172	6.69775
A0A0R4J0S1	Cdc42 effector protein 1 OS=Mus musculus GN=Cdc42ep1 PE=1 SV=1 - [A0A0R4J0S1_MOUSE]	4.65	2	1	1	3	409	43.0375	7.21045
J3QMH8	Protein unc-79 homolog (Fragment) OS=Mus musculus GN=Unc79 PE=4 SV=1 - [J3QMH8_MOUSE]	31.76	1	1	1	1	85	9.11367	7.18115
E9PXG9	Vacuolar protein sorting-associated protein 53 homolog OS=Mus musculus GN=Vps53 PE=1 SV=1 - [E9PXG9_MOUSE]	4.98	2	2	2	4	803	91.0643	6.60986
A0A140T8J4	Heme binding protein 1 OS=Mus musculus GN=Hebp1 PE=1 SV=1 - [A0A140T8J4_MOUSE]	21.58	2	2	2	11	190	21.0393	5.26221
B9EHV0	Leucine-rich repeat-containing protein 7 OS=Mus musculus GN=Lrrc7 PE=1 SV=1 - [B9EHV0_MOUSE]	6.51	5	5	5	6	1398	156.57	6.58057
A0A0U1RPB1	Optic atrophy 3 (Human), isoform CRA_b OS=Mus musculus GN=Opa3 PE=1 SV=1 - [A0A0U1RPB1_MOUSE]	5.29	1	1	1	1	208	23.8724	6.01123
A2AEE7	Cadherin EGF LAG seven-pass G-type receptor 2 OS=Mus musculus GN=Celsr2 PE=1 SV=1 - [A2AEE7_MOUSE]	1.44	2	2	2	3	2919	316.787	5.46533
A0A0N4SW65	N-acylneuraminate cytidylyltransferase OS=Mus musculus GN=Cmas PE=1 SV=1 - [A0A0N4SW65_MOUSE]	17.44	4	1	1	2	86	8.91609	12.0884
E9Q507	GON-4-like protein OS=Mus musculus GN=Gon4l PE=1 SV=1 - [E9Q507_MOUSE]	0.45	3	1	1	1	2242	246.553	4.85596
B1PSD9	Phosphodiesterase OS=Mus musculus GN=Pde4d PE=1 SV=1 - [B1PSD9_MOUSE]	3.72	6	1	1	3	698	79.0639	5.09717
D3Z077	Protein Pgbd5 OS=Mus musculus GN=Pgbd5 PE=1 SV=2 - [D3Z077_MOUSE]	5.13	3	1	1	2	409	46.3927	9.34912
A0A087WP08	DIS3-like exonuclease 2 OS=Mus musculus GN=Dis3l2 PE=1 SV=1 - [A0A087WP08_MOUSE]	14.63	2	1	1	1	123	13.4952	9.89111
A2AFW6	Mitochondrial carrier homolog 2 OS=Mus musculus GN=Mtch2 PE=1 SV=1 - [A2AFW6_MOUSE]	3.06	3	1	1	1	294	32.3235	8.51416
Z4YL78	Cytoskeleton-associated protein 5 OS=Mus musculus GN=Ckap5 PE=1 SV=1 - [Z4YL78_MOUSE]	0.86	4	1	1	1	1972	218.569	8.11865
F7BA91	26S proteasome non-ATPase regulatory subunit 5 (Fragment) OS=Mus musculus GN=Psmd5 PE=1 SV=1 - [F7BA91_MOUSE]	26.43	2	3	3	4	140	15.456	8.93896
E9PVM7	Glutathione S-transferase (Fragment) OS=Mus musculus GN=Gstm5 PE=1 SV=1 - [E9PVM7_MOUSE]	10.7	15	2	3	4	215	25.4877	6.22705
F6ZSG0	Protein LYRIC (Fragment) OS=Mus musculus GN=Mtdh PE=1 SV=1 - [F6ZSG0_MOUSE]	5.06	2	1	1	1	356	38.3848	5.92236
F7ADQ2	GTPase-activating protein and VPS9 domain-containing protein 1 (Fragment) OS=Mus musculus GN=Gapvd1 PE=1 SV=1 - [F7ADQ2_MOUSE]	3.79	4	2	2	3	896	99.1109	4.99561
J3KMQ2	Protein Gm5422 OS=Mus musculus GN=Gm5422 PE=4 SV=1 - [J3KMQ2_MOUSE]	3.54	2	2	2	3	903	100.099	5.50342
E9QA52	Glycosylphosphatidylinositol anchor attachment 1 protein (Fragment) OS=Mus musculus GN=Gpaa1 PE=1 SV=1 - [E9QA52_MOUSE]	17.57	4	1	1	1	74	8.47714	8.63135
D3YZ99	Protein N-terminal asparagine amidohydrolase OS=Mus musculus GN=Ntan1 PE=1 SV=1 - [D3YZ99_MOUSE]	9.25	2	1	1	1	227	24.9137	5.88428
A0A0G2JDW7	40S ribosomal protein S27 (Fragment) OS=Mus musculus GN=Rps27 PE=1 SV=1 - [A0A0G2JDW7_MOUSE]	25.61	7	2	2	4	82	9.22674	9.45166
A2ALV7	Protein AI314180 (Fragment) OS=Mus musculus GN=AI314180 PE=1 SV=1 - [A2ALV7_MOUSE]	0.94	2	1	1	1	1490	164.416	7.92822
A0A0G2JDI0	Mevalonate kinase (Fragment) OS=Mus musculus GN=Mvk PE=1 SV=1 - [A0A0G2JDI0_MOUSE]	15.44	6	1	1	1	136	14.6688	10.3599
E0CYI5	Protein Kng2 OS=Mus musculus GN=Kng2 PE=1 SV=1 - [E0CYI5_MOUSE]	6.78	4	1	1	3	177	19.5625	5.19873
B1AX95	Tumor protein p63-regulated gene 1-like protein OS=Mus musculus GN=Tprgl PE=1 SV=1 - [B1AX95_MOUSE]	15.46	2	1	1	7	207	23.0499	8.14795
A0A140LIQ6	Transforming acidic coiled-coil-containing protein 2 (Fragment) OS=Mus musculus GN=Tacc2 PE=1 SV=1 - [A0A140LIQ6_MOUSE]	4.95	7	1	1	4	829	90.9969	5.42725
A0A087WP13	Pleckstrin homology domain-containing family A member 6 (Fragment) OS=Mus musculus GN=Plekha6 PE=1 SV=1 - [A0A087WP13_MOUSE]	3.44	4	1	1	2	901	100.542	8.32373
J3QN87	Eukaryotic translation initiation factor 1 (Fragment) OS=Mus musculus GN=Eif1 PE=4 SV=1 - [J3QN87_MOUSE]	27.78	3	2	2	14	90	10.3483	8.92432
P63168	Dynein light chain 1, cytoplasmic OS=Mus musculus GN=Dynll1 PE=1 SV=1 - [DYL1_MOUSE]	29.21	1	1	1	4	89	10.3591	7.40088
Q6ZWZ7	60S ribosomal protein L17 OS=Mus musculus GN=Rpl17 PE=1 SV=1 - [Q6ZWZ7_MOUSE]	5.98	2	1	1	1	184	21.3834	10.1841
Q32MW3	Acyl-coenzyme A thioesterase 10, mitochondrial OS=Mus musculus GN=Acot10 PE=2 SV=1 - [ACO10_MOUSE]	2.28	2	1	1	1	439	50.5199	7.88428
P54923	[Protein ADP-ribosylarginine] hydrolase OS=Mus musculus GN=Adprh PE=1 SV=1 - [ADPRH_MOUSE]	4.14	1	1	1	3	362	40.0424	5.75732
Q03157	Amyloid-like protein 1 OS=Mus musculus GN=Aplp1 PE=1 SV=1 - [APLP1_MOUSE]	9.04	2	4	4	6	653	72.7054	5.66846
P06728	Apolipoprotein A-IV OS=Mus musculus GN=Apoa4 PE=1 SV=3 - [APOA4_MOUSE]	4.3	1	1	1	1	395	45.001	5.46533
O08691	Arginase-2, mitochondrial OS=Mus musculus GN=Arg2 PE=1 SV=1 - [ARGI2_MOUSE]	4.24	1	1	1	2	354	38.8541	6.58057
Q9D0J4	ADP-ribosylation factor-like protein 2 OS=Mus musculus GN=Arl2 PE=1 SV=1 - [ARL2_MOUSE]	8.7	1	1	1	2	184	20.8508	5.96045
Q9CPX6	Ubiquitin-like-conjugating enzyme ATG3 OS=Mus musculus GN=Atg3 PE=1 SV=1 - [ATG3_MOUSE]	5.1	1	1	1	2	314	35.7734	4.71631
P70345	Bcl-2-like protein 2 OS=Mus musculus GN=Bcl2l2 PE=1 SV=1 - [B2CL2_MOUSE]	9.84	2	1	1	1	193	20.7774	5.57959
Q3UI43	BRISC and BRCA1-A complex member 1 OS=Mus musculus GN=Babam1 PE=1 SV=1 - [BABA1_MOUSE]	11.11	1	1	1	3	333	36.7696	4.55127
Q6DFY8	BMP/retinoic acid-inducible neural-specific protein 2 OS=Mus musculus GN=Brinp2 PE=1 SV=1 - [BRNP2_MOUSE]	2.43	1	1	1	1	783	89.171	7.88428
Q8C3W1	Uncharacterized protein C1orf198 homolog OS=Mus musculus PE=1 SV=1 - [CA198_MOUSE]	39.44	1	6	6	24	322	35.2946	5.23682
Q9WTR5	Cadherin-13 OS=Mus musculus GN=Cdh13 PE=1 SV=2 - [CAD13_MOUSE]	9.1	1	4	4	19	714	78.137	5.12256
O89094	Caspase-14 OS=Mus musculus GN=Casp14 PE=1 SV=1 - [CASPE_MOUSE]	4.28	1	1	1	1	257	29.4396	4.85596
O88602	Voltage-dependent calcium channel gamma-2 subunit OS=Mus musculus GN=Cacng2 PE=1 SV=1 - [CCG2_MOUSE]	5.26	1	1	1	2	323	35.872	8.98291
Q9CPQ5	Centromere protein Q OS=Mus musculus GN=Cenpq PE=2 SV=2 - [CENPQ_MOUSE]	8.24	1	1	1	1	267	30.4823	9.30518
Q6PDY0	Coiled-coil domain-containing protein 85B OS=Mus musculus GN=Ccdc85b PE=1 SV=1 - [CC85B_MOUSE]	5.45	1	1	1	2	202	22.1192	5.08447
P70211	Netrin receptor DCC OS=Mus musculus GN=Dcc PE=1 SV=2 - [DCC_MOUSE]	0.9	1	1	1	1	1447	158.242	6.72705
P23116	Eukaryotic translation initiation factor 3 subunit A OS=Mus musculus GN=Eif3a PE=1 SV=5 - [EIF3A_MOUSE]	1.86	1	2	2	2	1344	161.838	6.771
P29387	Guanine nucleotide-binding protein subunit beta-4 OS=Mus musculus GN=Gnb4 PE=1 SV=4 - [GBB4_MOUSE]	29.71	2	2	5	17	340	37.355	6.16357
Q9WVR4	Fragile X mental retardation syndrome-related protein 2 OS=Mus musculus GN=Fxr2 PE=1 SV=1 - [FXR2_MOUSE]	4.75	2	2	2	3	673	73.6977	6.22705
P51163	Uroporphyrinogen-III synthase OS=Mus musculus GN=Uros PE=1 SV=1 - [HEM4_MOUSE]	7.92	1	1	1	10	265	28.4856	6.53662
Q0VE82	Copine-7 OS=Mus musculus GN=Cpne7 PE=1 SV=1 - [CPNE7_MOUSE]	2.69	1	1	1	3	557	61.8519	5.40186
Q9Z160	Conserved oligomeric Golgi complex subunit 1 OS=Mus musculus GN=Cog1 PE=1 SV=3 - [COG1_MOUSE]	2.76	6	1	2	4	980	108.981	7.18115
Q8VHY0	Chondroitin sulfate proteoglycan 4 OS=Mus musculus GN=Cspg4 PE=1 SV=3 - [CSPG4_MOUSE]	1.68	1	2	2	2	2327	252.153	5.43994
Q8BGX2	Uncharacterized protein C19orf52 homolog OS=Mus musculus PE=1 SV=1 - [CS052_MOUSE]	16.17	1	1	1	1	266	29.397	6.72705
A2ADY9	Protein DDI1 homolog 2 OS=Mus musculus GN=Ddi2 PE=1 SV=1 - [DDI2_MOUSE]	14.79	1	3	3	3	399	44.5625	5.04639
O70133	ATP-dependent RNA helicase A OS=Mus musculus GN=Dhx9 PE=1 SV=2 - [DHX9_MOUSE]	2.17	5	3	3	3	1380	149.381	6.82959
P62869	Transcription elongation factor B polypeptide 2 OS=Mus musculus GN=Tceb2 PE=1 SV=1 - [ELOB_MOUSE]	27.12	1	2	2	3	118	13.1616	5.0083
P22907	Porphobilinogen deaminase OS=Mus musculus GN=Hmbs PE=1 SV=2 - [HEM3_MOUSE]	3.05	1	1	1	1	361	39.3197	6.87354
Q9ERS6	X-linked interleukin-1 receptor accessory protein-like 2 OS=Mus musculus GN=Il1rapl2 PE=2 SV=1 - [IRPL2_MOUSE]	1.02	1	1	1	1	686	78.7469	6.17627
Q3UV74	Integrin beta-2-like protein OS=Mus musculus GN=Itgb2l PE=1 SV=1 - [ITB2L_MOUSE]	2.3	2	1	1	1	738	81.4931	7.07861
Q8K273	Membrane magnesium transporter 1 OS=Mus musculus GN=Mmgt1 PE=1 SV=1 - [MMGT1_MOUSE]	18.32	1	1	1	1	131	14.6676	9.15869
Q99J09	Methylosome protein 50 OS=Mus musculus GN=Wdr77 PE=1 SV=1 - [MEP50_MOUSE]	21.35	2	5	5	13	342	36.9192	5.2749
Q3B7Z2	Oxysterol-binding protein 1 OS=Mus musculus GN=Osbp PE=1 SV=3 - [OSBP1_MOUSE]	3.48	1	2	2	2	805	88.7411	7.1958
O09113	Homeobox protein orthopedia OS=Mus musculus GN=Otp PE=2 SV=1 - [OTP_MOUSE]	11.69	1	1	1	1	325	34.1372	9.46631
Q3TIU4	2',5'-phosphodiesterase 12 OS=Mus musculus GN=Pde12 PE=1 SV=2 - [PDE12_MOUSE]	4.11	1	2	2	2	608	67.471	6.91748
O54734	Dolichyl-diphosphooligosaccharide--protein glycosyltransferase 48 kDa subunit OS=Mus musculus GN=Ddost PE=1 SV=2 - [OST48_MOUSE]	2.04	1	1	1	1	441	48.997	5.8335
D3Z690	Izumo sperm-egg fusion protein 4 OS=Mus musculus GN=Izumo4 PE=1 SV=1 - [IZUM4_MOUSE]	6.17	1	1	1	2	227	26.3151	8.01611
Q7TNG8	Probable D-lactate dehydrogenase, mitochondrial OS=Mus musculus GN=Ldhd PE=1 SV=1 - [LDHD_MOUSE]	3.31	1	1	1	1	484	51.8152	6.62451
Q99KR3	Endoribonuclease LACTB2 OS=Mus musculus GN=Lactb2 PE=1 SV=1 - [LACB2_MOUSE]	8.68	1	2	2	3	288	32.7338	6.32861
Q9DB27	Malignant T-cell-amplified sequence 1 OS=Mus musculus GN=Mcts1 PE=1 SV=1 - [MCTS1_MOUSE]	7.73	1	1	1	1	181	20.5418	8.82178
P70202	Latexin OS=Mus musculus GN=Lxn PE=1 SV=2 - [LXN_MOUSE]	5.86	1	2	2	4	222	25.4756	5.74463
Q9DCJ1	Target of rapamycin complex subunit LST8 OS=Mus musculus GN=Mlst8 PE=1 SV=1 - [LST8_MOUSE]	12.58	1	2	2	3	326	35.8282	5.85889
Q3UMR5	Calcium uniporter protein, mitochondrial OS=Mus musculus GN=Mcu PE=1 SV=2 - [MCU_MOUSE]	3.43	1	1	1	1	350	39.6566	8.55811
Q9CRB8	Mitochondrial fission process protein 1 OS=Mus musculus GN=Mtfp1 PE=1 SV=1 - [MTFP1_MOUSE]	7.83	1	1	1	1	166	18.3026	8.67529
P10493	Nidogen-1 OS=Mus musculus GN=Nid1 PE=1 SV=2 - [NID1_MOUSE]	0.88	1	1	1	1	1245	136.45	5.43994
Q9JHW2	Omega-amidase NIT2 OS=Mus musculus GN=Nit2 PE=1 SV=1 - [NIT2_MOUSE]	16.3	1	3	3	6	276	30.4826	6.90283
Q3UHK1	Proton myo-inositol cotransporter OS=Mus musculus GN=Slc2a13 PE=1 SV=2 - [MYCT_MOUSE]	5.02	1	3	3	4	637	69.018	6.85889
Q3URU2	Paternally-expressed gene 3 protein OS=Mus musculus GN=Peg3 PE=1 SV=1 - [PEG3_MOUSE]	1.46	1	1	1	1	1571	178.822	5.45264
Q02257	Junction plakoglobin OS=Mus musculus GN=Jup PE=1 SV=3 - [PLAK_MOUSE]	5.64	1	2	3	5	745	81.7488	6.13818
Q8BHF7	CDP-diacylglycerol--glycerol-3-phosphate 3-phosphatidyltransferase, mitochondrial OS=Mus musculus GN=Pgs1 PE=1 SV=1 - [PGPS1_MOUSE]	2.89	1	1	1	1	553	62.4496	8.89502
Q8BHL8	Proteasome inhibitor PI31 subunit OS=Mus musculus GN=Psmf1 PE=1 SV=1 - [PSMF1_MOUSE]	19.19	1	2	2	5	271	29.6458	5.24951
Q80Y24	Prickle-like protein 2 OS=Mus musculus GN=Prickle2 PE=1 SV=3 - [PRIC2_MOUSE]	1.66	2	1	1	1	845	95.7196	7.26904
Q9D8U8	Sorting nexin-5 OS=Mus musculus GN=Snx5 PE=1 SV=1 - [SNX5_MOUSE]	7.43	1	2	2	2	404	46.7681	6.62451
Q8VCD6	Receptor expression-enhancing protein 2 OS=Mus musculus GN=Reep2 PE=1 SV=2 - [REEP2_MOUSE]	18.9	1	2	2	11	254	28.419	9.40771
Q8BYP3	Rho-related GTP-binding protein RhoF OS=Mus musculus GN=Rhof PE=1 SV=1 - [RHOF_MOUSE]	9.48	1	1	1	1	211	23.5621	8.42627
Q9DCU6	39S ribosomal protein L4, mitochondrial OS=Mus musculus GN=Mrpl4 PE=1 SV=1 - [RM04_MOUSE]	3.74	1	1	1	1	294	33.0525	9.81787
P50247	Adenosylhomocysteinase OS=Mus musculus GN=Ahcy PE=1 SV=3 - [SAHH_MOUSE]	8.1	2	3	3	7	432	47.6573	6.53662
Q9D287	Pre-mRNA-splicing factor SPF27 OS=Mus musculus GN=Bcas2 PE=1 SV=1 - [SPF27_MOUSE]	5.78	1	1	1	1	225	26.115	5.65576
Q91WQ3	Tyrosine--tRNA ligase, cytoplasmic OS=Mus musculus GN=Yars PE=1 SV=3 - [SYYC_MOUSE]	6.82	2	2	2	15	528	59.0681	7.00537
Q9CQN3	Mitochondrial import receptor subunit TOM6 homolog OS=Mus musculus GN=Tomm6 PE=3 SV=1 - [TOM6_MOUSE]	18.92	1	1	1	4	74	7.85997	4.89404
Q505D9	Tripartite motif-containing protein 67 OS=Mus musculus GN=Trim67 PE=2 SV=1 - [TRI67_MOUSE]	5.6	1	1	1	1	768	82.7068	7.07861
Q8BH58	TIP41-like protein OS=Mus musculus GN=Tiprl PE=1 SV=1 - [TIPRL_MOUSE]	14.02	1	2	2	5	271	31.2336	5.63037
Q8BJH1	Zinc finger C2HC domain-containing protein 1A OS=Mus musculus GN=Zc2hc1a PE=1 SV=1 - [ZC21A_MOUSE]	6.17	1	2	2	2	324	35.1301	9.87646
Q62481	Vacuolar protein sorting-associated protein 72 homolog OS=Mus musculus GN=Vps72 PE=2 SV=2 - [VPS72_MOUSE]	8.15	1	1	1	1	368	40.7587	6.40479
Q5H8C4	Vacuolar protein sorting-associated protein 13A OS=Mus musculus GN=Vps13a PE=1 SV=1 - [VP13A_MOUSE]	0.32	1	1	1	1	3166	359.173	6.18896
Q9CR26	Vacuolar protein sorting-associated protein VTA1 homolog OS=Mus musculus GN=Vta1 PE=1 SV=1 - [VTA1_MOUSE]	7.44	1	2	2	8	309	33.8919	6.12549
A0A087WRP7	Lymphocyte antigen 6C1 (Fragment) OS=Mus musculus GN=Ly6c1 PE=1 SV=1 - [A0A087WRP7_MOUSE]	16.22	3	1	1	2	111	12.0238	6.01123
E9PYJ7	Membrane-associated phosphatidylinositol transfer protein 2 OS=Mus musculus GN=Pitpnm2 PE=1 SV=1 - [E9PYJ7_MOUSE]	1.05	2	1	1	1	1331	147.532	7.34229
E9Q8C1	Serine/threonine-protein kinase Sgk1 OS=Mus musculus GN=Sgk1 PE=1 SV=1 - [E9Q8C1_MOUSE]	4.21	3	1	1	1	404	45.9287	8.07471
A0A0N4SWH2	Plasminogen activator inhibitor 1 RNA-binding protein OS=Mus musculus GN=Serbp1 PE=1 SV=1 - [A0A0N4SWH2_MOUSE]	9.95	4	1	1	22	211	22.6888	10.1255
A0A0R4J1Y6	A-kinase anchor protein SPHKAP (Fragment) OS=Mus musculus GN=Sphkap PE=1 SV=1 - [A0A0R4J1Y6_MOUSE]	3.71	3	2	2	2	1400	153.078	5.14795
E0CYU5	Methionine adenosyltransferase 2 subunit beta OS=Mus musculus GN=Mat2b PE=1 SV=1 - [E0CYU5_MOUSE]	11.76	2	1	1	5	102	11.706	7.47412
E9PYM7	Alpha-mannosidase (Fragment) OS=Mus musculus GN=Man2c1 PE=1 SV=1 - [E9PYM7_MOUSE]	3.12	3	1	1	1	866	96.3615	6.55127
B8A5X0	Tetratricopeptide repeat protein 25 OS=Mus musculus GN=Ttc25 PE=1 SV=1 - [B8A5X0_MOUSE]	3.16	2	1	1	1	506	58.1889	8.38232
E9Q616	Protein Ahnak OS=Mus musculus GN=Ahnak PE=1 SV=1 - [E9Q616_MOUSE]	0.5	1	1	1	1	5656	603.866	6.30322
F8WHU9	Zinc finger protein ZPR1 (Fragment) OS=Mus musculus GN=Zpr1 PE=1 SV=1 - [F8WHU9_MOUSE]	6.74	3	1	1	5	386	42.4109	4.79248
E9Q5W5	Zinc finger ZZ-type and EF-hand domain-containing protein 1 OS=Mus musculus GN=Zzef1 PE=1 SV=1 - [E9Q5W5_MOUSE]	0.44	3	1	1	1	2924	328.059	6.1001
F6XWD4	Protein phosphatase 1 regulatory subunit 12C (Fragment) OS=Mus musculus GN=Ppp1r12c PE=1 SV=1 - [F6XWD4_MOUSE]	3.69	2	1	1	7	704	76.5959	5.97314
A0A4W9	Neuronal growth regulator 1 OS=Mus musculus GN=Negr1 PE=1 SV=1 - [A0A4W9_MOUSE]	22.8	4	6	6	69	329	36.0952	6.85889
A2A6T4	Immature colon carcinoma transcript 1, isoform CRA_c OS=Mus musculus GN=Mrpl58 PE=1 SV=1 - [A2A6T4_MOUSE]	8.6	2	1	1	1	186	21.3433	10.2134
E9PVG8	Protein 9530053A07Rik OS=Mus musculus GN=9530053A07Rik PE=1 SV=1 - [E9PVG8_MOUSE]	1.9	3	2	2	2	2581	280.044	6.17627
D3YWC2	ADP-ribosylation factor-like 6 interacting protein 4 OS=Mus musculus GN=Arl6ip4 PE=1 SV=1 - [D3YWC2_MOUSE]	8.5	3	1	1	1	200	22.5922	11.2974
Q3TL72	NEDD8-activating enzyme E1 catalytic subunit OS=Mus musculus GN=Uba3 PE=1 SV=1 - [Q3TL72_MOUSE]	2.9	2	1	1	4	448	49.9252	5.2749
F6XV67	Protein 2410004B18Rik (Fragment) OS=Mus musculus GN=2410004B18Rik PE=1 SV=1 - [F6XV67_MOUSE]	25.45	3	1	1	2	55	6.33133	8.6167
G3UZD2	RNA-binding protein FUS (Fragment) OS=Mus musculus GN=Fus PE=1 SV=1 - [G3UZD2_MOUSE]	18.27	5	1	1	1	104	10.5817	9.67139
D3Z6S5	Pleckstrin homology domain-containing family B member 1 (Fragment) OS=Mus musculus GN=Plekhb1 PE=1 SV=2 - [D3Z6S5_MOUSE]	15.44	3	1	1	2	149	17.2215	6.18896
A0A087WP24	Protein ABHD14B (Fragment) OS=Mus musculus GN=Abhd14b PE=1 SV=1 - [A0A087WP24_MOUSE]	17.61	7	2	2	4	142	14.9389	7.35693
A0A0R4J107	Acylamino-acid-releasing enzyme (Fragment) OS=Mus musculus GN=Apeh PE=1 SV=1 - [A0A0R4J107_MOUSE]	9.64	3	3	3	16	716	79.7638	5.59229
F6PYI8	Proline dehydrogenase 1, mitochondrial (Fragment) OS=Mus musculus GN=Prodh PE=1 SV=1 - [F6PYI8_MOUSE]	9.43	3	1	1	3	244	27.7688	6.53662
H3BKW0	Cleavage and polyadenylation-specificity factor subunit 6 (Fragment) OS=Mus musculus GN=Cpsf6 PE=1 SV=1 - [H3BKW0_MOUSE]	24.18	4	2	2	2	182	21.2355	9.72998
A0A0J9YTX6	Ubiquitin-protein ligase E3A (Fragment) OS=Mus musculus GN=Ube3a PE=1 SV=3 - [A0A0J9YTX6_MOUSE]	55.1	5	1	1	1	49	5.46055	7.81104
D6RIN4	Dynein light chain 2, cytoplasmic OS=Mus musculus GN=Dynll2 PE=1 SV=1 - [D6RIN4_MOUSE]	49.06	2	1	1	4	53	6.10507	8.14795
D6RFQ8	Alanine aminotransferase 2 OS=Mus musculus GN=Gpt2 PE=1 SV=1 - [D6RFQ8_MOUSE]	11.39	2	1	1	2	158	17.2761	10.6235
E0CZ04	Gamma-glutamylaminecyclotransferase (Fragment) OS=Mus musculus GN=Ggact PE=1 SV=1 - [E0CZ04_MOUSE]	13.33	3	1	1	5	105	11.9258	5.38916
A3KGR9	Minor histocompatibility antigen H13 (Fragment) OS=Mus musculus GN=H13 PE=1 SV=1 - [A3KGR9_MOUSE]	6.05	1	1	1	2	347	38.15	8.39697
F6TFN2	Protein Lmo7 (Fragment) OS=Mus musculus GN=Lmo7 PE=1 SV=1 - [F6TFN2_MOUSE]	1.35	4	1	1	1	1189	133.868	5.98584
A2AFP4	Ras-related protein Rab-9A (Fragment) OS=Mus musculus GN=Rab9 PE=1 SV=1 - [A2AFP4_MOUSE]	28.81	3	1	1	1	59	6.53134	7.41553
P62956	Voltage-dependent calcium channel gamma-7 subunit OS=Mus musculus GN=Cacng7 PE=1 SV=1 - [CCG7_MOUSE]	6.91	1	1	1	1	275	30.9825	7.12256
P62700	Protein yippee-like 5 OS=Mus musculus GN=Ypel5 PE=1 SV=1 - [YPEL5_MOUSE]	17.36	1	1	1	2	121	13.8328	7.31299
P62315	Small nuclear ribonucleoprotein Sm D1 OS=Mus musculus GN=Snrpd1 PE=1 SV=1 - [SMD1_MOUSE]	18.49	1	2	2	4	119	13.2734	11.561
Q91XE4	N-acyl-aromatic-L-amino acid amidohydrolase (carboxylate-forming) OS=Mus musculus GN=Acy3 PE=1 SV=1 - [ACY3_MOUSE]	6.6	1	1	1	1	318	35.2636	5.50342
Q8BGR6	ADP-ribosylation factor-like protein 15 OS=Mus musculus GN=Arl15 PE=1 SV=1 - [ARL15_MOUSE]	7.84	1	2	2	2	204	22.8905	5.2876
Q9D5T0	ATPase family AAA domain-containing protein 1 OS=Mus musculus GN=Atad1 PE=1 SV=1 - [ATAD1_MOUSE]	9.7	1	3	3	3	361	40.718	6.90283
P16460	Argininosuccinate synthase OS=Mus musculus GN=Ass1 PE=1 SV=1 - [ASSY_MOUSE]	4.61	1	1	1	2	412	46.555	8.22119
P28028	Serine/threonine-protein kinase B-raf OS=Mus musculus GN=Braf PE=1 SV=3 - [BRAF_MOUSE]	1.87	1	1	1	1	804	88.7237	7.6499
Q9CRC6	BLOC-1-related complex subunit 7 OS=Mus musculus GN=Borcs7 PE=1 SV=1 - [BORC7_MOUSE]	43.81	1	3	3	3	105	11.539	6.78564
Q9D9H8	UPF0565 protein C2orf69 homolog OS=Mus musculus PE=2 SV=3 - [CB069_MOUSE]	2.74	1	1	1	1	365	41.6627	7.86963
Q8C1Y8	Vacuolar fusion protein CCZ1 homolog OS=Mus musculus GN=Ccz1 PE=1 SV=1 - [CCZ1_MOUSE]	5.63	1	2	2	2	480	55.469	6.02393
P56389	Cytidine deaminase OS=Mus musculus GN=Cda PE=1 SV=2 - [CDD_MOUSE]	30.82	1	3	3	9	146	16.121	5.57959
Q9R171	Cerebellin-1 OS=Mus musculus GN=Cbln1 PE=1 SV=1 - [CBLN1_MOUSE]	11.92	1	1	1	4	193	21.0997	7.28369
Q6PDL0	Cytoplasmic dynein 1 light intermediate chain 2 OS=Mus musculus GN=Dync1li2 PE=1 SV=2 - [DC1L2_MOUSE]	2.44	1	1	1	2	492	54.1846	6.27783
Q9QXY6	EH domain-containing protein 3 OS=Mus musculus GN=Ehd3 PE=1 SV=2 - [EHD3_MOUSE]	7.48	2	3	3	10	535	60.7827	6.45557
Q8R1B4	Eukaryotic translation initiation factor 3 subunit C OS=Mus musculus GN=Eif3c PE=1 SV=1 - [EIF3C_MOUSE]	1.32	1	1	1	1	911	105.465	5.78271
Q8BGB7	Enolase-phosphatase E1 OS=Mus musculus GN=Enoph1 PE=1 SV=1 - [ENOPH_MOUSE]	5.84	1	2	2	2	257	28.5824	4.91943
Q9Z1N5	Spliceosome RNA helicase Ddx39b OS=Mus musculus GN=Ddx39b PE=1 SV=1 - [DX39B_MOUSE]	6.54	2	2	2	3	428	49.004	5.66846
Q9QZF2	Glypican-1 OS=Mus musculus GN=Gpc1 PE=1 SV=1 - [GPC1_MOUSE]	3.23	1	1	1	2	557	61.3207	7.04932
P20060	Beta-hexosaminidase subunit beta OS=Mus musculus GN=Hexb PE=1 SV=2 - [HEXB_MOUSE]	3.36	1	1	1	7	536	61.0771	8.11865
Q8BMK4	Cytoskeleton-associated protein 4 OS=Mus musculus GN=Ckap4 PE=1 SV=2 - [CKAP4_MOUSE]	5.39	1	2	2	2	575	63.6536	5.64307
Q91X84	CREB-regulated transcription coactivator 3 OS=Mus musculus GN=Crtc3 PE=1 SV=2 - [CRTC3_MOUSE]	3.23	1	2	2	3	619	66.9852	6.82959
Q99LI7	Cleavage stimulation factor subunit 3 OS=Mus musculus GN=Cstf3 PE=1 SV=1 - [CSTF3_MOUSE]	3.49	1	1	1	1	717	82.8237	8.11865
Q61655	ATP-dependent RNA helicase DDX19A OS=Mus musculus GN=Ddx19a PE=1 SV=2 - [DD19A_MOUSE]	5.23	3	1	1	4	478	53.8988	6.66846
P60904	DnaJ homolog subfamily C member 5 OS=Mus musculus GN=Dnajc5 PE=1 SV=1 - [DNJC5_MOUSE]	17.17	1	1	1	3	198	22.0863	5.07178
Q64442	Sorbitol dehydrogenase OS=Mus musculus GN=Sord PE=1 SV=3 - [DHSO_MOUSE]	15.41	1	4	4	8	357	38.2247	7.02002
Q9CR25	Diphthamide biosynthesis protein 2 OS=Mus musculus GN=Dph2 PE=1 SV=1 - [DPH2_MOUSE]	5.52	1	1	1	1	489	52.3318	5.52881
Q8BYI8	Protein FAM234B OS=Mus musculus GN=Fam234b PE=1 SV=1 - [F234B_MOUSE]	1.6	1	1	1	1	624	66.9895	5.03369
Q8BTW3	Exosome complex component MTR3 OS=Mus musculus GN=Exosc6 PE=1 SV=1 - [EXOS6_MOUSE]	4.03	1	1	1	1	273	28.3526	6.11279
P59113	Fermitin family homolog 1 OS=Mus musculus GN=Fermt1 PE=1 SV=4 - [FERM1_MOUSE]	1.77	1	1	1	9	677	76.892	6.26514
Q8K3B1	F-box/SPRY domain-containing protein 1 OS=Mus musculus GN=Fbxo45 PE=1 SV=2 - [FBSP1_MOUSE]	14.69	1	2	2	2	286	30.5852	7.85498
Q6PDJ6	F-box only protein 42 OS=Mus musculus GN=Fbxo42 PE=1 SV=1 - [FBX42_MOUSE]	3.63	1	1	1	1	717	77.7275	7.57666
A2AFR3	FERM and PDZ domain-containing protein 4 OS=Mus musculus GN=Frmpd4 PE=1 SV=1 - [FRPD4_MOUSE]	1.52	1	1	1	1	1320	144.887	5.24951
Q91VW5	Golgin subfamily A member 4 OS=Mus musculus GN=Golga4 PE=1 SV=2 - [GOGA4_MOUSE]	0.85	1	1	1	1	2238	257.406	5.36377
Q8BTZ7	Mannose-1-phosphate guanyltransferase beta OS=Mus musculus GN=Gmppb PE=1 SV=1 - [GMPPB_MOUSE]	18.06	1	3	3	9	360	39.8906	6.7417
Q61666	Protein HIRA OS=Mus musculus GN=Hira PE=1 SV=3 - [HIRA_MOUSE]	3.05	1	1	1	1	1015	111.696	8.06006
P00493	Hypoxanthine-guanine phosphoribosyltransferase OS=Mus musculus GN=Hprt1 PE=1 SV=3 - [HPRT_MOUSE]	16.06	1	2	2	4	218	24.5546	6.68311
Q62470	Integrin alpha-3 OS=Mus musculus GN=Itga3 PE=1 SV=1 - [ITA3_MOUSE]	1.23	1	1	1	2	1053	116.671	6.56592
Q8HW98	IgLON family member 5 OS=Mus musculus GN=Iglon5 PE=2 SV=2 - [IGLO5_MOUSE]	5.65	1	1	1	1	336	36.7438	7.69385
Q8VEA4	Mitochondrial intermembrane space import and assembly protein 40 OS=Mus musculus GN=Chchd4 PE=1 SV=1 - [MIA40_MOUSE]	16.55	1	1	1	2	139	15.5149	4.32275
Q6ZQI3	Malectin OS=Mus musculus GN=Mlec PE=1 SV=2 - [MLEC_MOUSE]	4.12	1	1	1	3	291	32.3218	6.04932
Q6P3A8	2-oxoisovalerate dehydrogenase subunit beta, mitochondrial OS=Mus musculus GN=Bckdhb PE=1 SV=2 - [ODBB_MOUSE]	3.33	1	1	1	1	390	42.8528	6.69775
Q9D1L9	Ragulator complex protein LAMTOR5 OS=Mus musculus GN=Lamtor5 PE=1 SV=1 - [LTOR5_MOUSE]	21.98	2	1	1	2	91	9.63572	4.86865
Q91YK8	Ly6/PLAUR domain-containing protein 3 OS=Mus musculus GN=Lypd3 PE=2 SV=1 - [LYPD3_MOUSE]	8.26	1	1	1	1	363	37.4651	7.06396
Q9JHS3	Ragulator complex protein LAMTOR2 OS=Mus musculus GN=Lamtor2 PE=1 SV=1 - [LTOR2_MOUSE]	24	2	2	2	2	125	13.4718	5.40186
Q6PDN3	Myosin light chain kinase, smooth muscle OS=Mus musculus GN=Mylk PE=1 SV=3 - [MYLK_MOUSE]	0.46	2	1	1	1	1941	212.792	6.25244
Q99KQ4	Nicotinamide phosphoribosyltransferase OS=Mus musculus GN=Nampt PE=1 SV=1 - [NAMPT_MOUSE]	4.48	1	1	1	1	491	55.4125	7.15186
Q9DCJ9	N-acetylneuraminate lyase OS=Mus musculus GN=Npl PE=1 SV=1 - [NPL_MOUSE]	5.94	1	1	1	1	320	35.1083	8.03076
Q9DCN2	NADH-cytochrome b5 reductase 3 OS=Mus musculus GN=Cyb5r3 PE=1 SV=3 - [NB5R3_MOUSE]	15.95	3	3	3	11	301	34.1057	8.38232
Q501J7	Phosphatase and actin regulator 4 OS=Mus musculus GN=Phactr4 PE=1 SV=2 - [PHAR4_MOUSE]	4.9	2	1	2	2	694	76.5852	6.48096
Q61233	Plastin-2 OS=Mus musculus GN=Lcp1 PE=1 SV=4 - [PLSL_MOUSE]	4.31	4	2	2	12	627	70.1048	5.32568
Q8JZW8	Paraneoplastic antigen Ma3 homolog OS=Mus musculus GN=Pnma3 PE=2 SV=1 - [PNMA3_MOUSE]	2.79	1	1	1	1	466	54.0068	9.24658
P16675	Lysosomal protective protein OS=Mus musculus GN=Ctsa PE=1 SV=1 - [PPGB_MOUSE]	4.22	2	1	1	1	474	53.8095	5.85889
P70698	CTP synthase 1 OS=Mus musculus GN=Ctps1 PE=1 SV=2 - [PYRG1_MOUSE]	2.03	1	1	1	2	591	66.6401	6.58057
O55100	Synaptogyrin-1 OS=Mus musculus GN=Syngr1 PE=1 SV=2 - [SNG1_MOUSE]	5.13	1	1	1	2	234	25.6363	4.65283
Q61550	Double-strand-break repair protein rad21 homolog OS=Mus musculus GN=Rad21 PE=1 SV=3 - [RAD21_MOUSE]	5.67	1	2	2	2	635	72.0379	4.64014
P54728	UV excision repair protein RAD23 homolog B OS=Mus musculus GN=Rad23b PE=1 SV=2 - [RD23B_MOUSE]	6.49	1	2	2	4	416	43.4858	4.83057
Q8BGH4	Receptor expression-enhancing protein 1 OS=Mus musculus GN=Reep1 PE=1 SV=1 - [REEP1_MOUSE]	25.37	1	2	2	6	201	22.2704	9.49561
Q9CQF0	39S ribosomal protein L11, mitochondrial OS=Mus musculus GN=Mrpl11 PE=1 SV=1 - [RM11_MOUSE]	5.73	1	1	1	2	192	20.6673	9.72998
Q9DCV4	Regulator of microtubule dynamics protein 1 OS=Mus musculus GN=Rmdn1 PE=1 SV=2 - [RMD1_MOUSE]	5.25	1	1	1	1	305	34.9782	8.70459
P14869	60S acidic ribosomal protein P0 OS=Mus musculus GN=Rplp0 PE=1 SV=3 - [RLA0_MOUSE]	17.67	3	3	3	5	317	34.1948	6.25244
Q99N92	39S ribosomal protein L27, mitochondrial OS=Mus musculus GN=Mrpl27 PE=1 SV=1 - [RM27_MOUSE]	7.43	1	1	1	1	148	15.9346	10.1694
[truncated: 1,237 more rows]

## Sheet: Protein ID_50 ug
Accession	Description	ΣCoverage	Σ# Proteins	Σ# Unique Peptides	Σ# Peptides	Σ# PSMs	# AAs	MW [kDa]	calc. pI
S4R1H9	E3 ubiquitin-protein ligase RNF181 (Fragment) OS=Mus musculus GN=Rnf181 PE=1 SV=1 - [S4R1H9_MOUSE]	90.32	7	2	2	2	31	3.73972	5.17334
Q91VW3	SH3 domain-binding glutamic acid-rich-like protein 3 OS=Mus musculus GN=Sh3bgrl3 PE=1 SV=1 - [SH3L3_MOUSE]	80.65	2	4	4	28	93	10.4703	5.13525
P10853	Histone H2B type 1-F/J/L OS=Mus musculus GN=Hist1h2bf PE=1 SV=2 - [H2B1F_MOUSE]	74.6	11	5	12	44	126	13.9276	10.3159
P08249	Malate dehydrogenase, mitochondrial OS=Mus musculus GN=Mdh2 PE=1 SV=3 - [MDHM_MOUSE]	71.01	3	33	33	265	338	35.5888	8.67529
P56391	Cytochrome c oxidase subunit 6B1 OS=Mus musculus GN=Cox6b1 PE=1 SV=2 - [CX6B1_MOUSE]	67.44	2	5	5	26	86	10.0649	8.71924
P05063	Fructose-bisphosphate aldolase C OS=Mus musculus GN=Aldoc PE=1 SV=4 - [ALDOC_MOUSE]	66.39	1	26	31	197	363	39.3702	7.12256
Q9CQ75	NADH dehydrogenase [ubiquinone] 1 alpha subcomplex subunit 2 OS=Mus musculus GN=Ndufa2 PE=1 SV=3 - [NDUA2_MOUSE]	65.66	1	7	7	57	99	10.9088	9.99365
A8DUK4	Beta-globin OS=Mus musculus GN=Hbbt1 PE=1 SV=1 - [A8DUK4_MOUSE]	65.31	5	10	10	216	147	15.7382	7.69385
Q8CGP0	Histone H2B type 3-B OS=Mus musculus GN=Hist3h2bb PE=1 SV=3 - [H2B3B_MOUSE]	65.08	3	1	8	38	126	13.8995	10.3159
B1ASE2	ATP synthase subunit d, mitochondrial (Fragment) OS=Mus musculus GN=Atp5h PE=1 SV=1 - [B1ASE2_MOUSE]	63.77	3	9	9	55	138	15.8721	5.22412
P17742	Peptidyl-prolyl cis-trans isomerase A OS=Mus musculus GN=Ppia PE=1 SV=2 - [PPIA_MOUSE]	63.41	3	13	14	188	164	17.9599	7.89893
F7A0B0	Myelin basic protein (Fragment) OS=Mus musculus GN=Mbp PE=1 SV=1 - [F7A0B0_MOUSE]	62.76	5	1	18	202	196	21.3358	10.77
Q91VR8	Protein BRICK1 OS=Mus musculus GN=Brk1 PE=1 SV=1 - [BRK1_MOUSE]	62.67	1	5	5	12	75	8.75546	5.45264
P05064	Fructose-bisphosphate aldolase A OS=Mus musculus GN=Aldoa PE=1 SV=2 - [ALDOA_MOUSE]	61.26	7	5	24	272	364	39.3313	8.08936
O08553	Dihydropyrimidinase-related protein 2 OS=Mus musculus GN=Dpysl2 PE=1 SV=2 - [DPYL2_MOUSE]	60.84	1	31	34	479	572	62.2386	6.37939
F6RT34	Myelin basic protein (Fragment) OS=Mus musculus GN=Mbp PE=1 SV=1 - [F6RT34_MOUSE]	59.43	5	1	18	215	212	23.1817	10.8726
P17182	Alpha-enolase OS=Mus musculus GN=Eno1 PE=1 SV=3 - [ENOA_MOUSE]	58.76	5	28	33	213	434	47.1112	6.80029
Q9CWF2	Tubulin beta-2B chain OS=Mus musculus GN=Tubb2b PE=1 SV=1 - [TBB2B_MOUSE]	58.65	2	1	27	581	445	49.9209	4.89404
P68372	Tubulin beta-4B chain OS=Mus musculus GN=Tubb4b PE=1 SV=1 - [TBB4B_MOUSE]	58.65	2	2	28	620	445	49.799	4.89404
Q7TMM9	Tubulin beta-2A chain OS=Mus musculus GN=Tubb2a PE=1 SV=1 - [TBB2A_MOUSE]	58.65	2	2	28	588	445	49.875	4.89404
P56382	ATP synthase subunit epsilon, mitochondrial OS=Mus musculus GN=Atp5e PE=1 SV=2 - [ATP5E_MOUSE]	57.69	1	3	3	8	52	5.83415	10.0083
D3Z5N2	Stathmin OS=Mus musculus GN=Stmn1 PE=1 SV=1 - [D3Z5N2_MOUSE]	56.46	4	10	10	52	147	16.9739	9.08545
Q9Z1P6	NADH dehydrogenase [ubiquinone] 1 alpha subcomplex subunit 7 OS=Mus musculus GN=Ndufa7 PE=1 SV=3 - [NDUA7_MOUSE]	55.75	1	9	9	37	113	12.5676	10.1694
A6X925	Ubiquitin-conjugating enzyme E2 variant 2 OS=Mus musculus GN=Ube2v2 PE=1 SV=1 - [A6X925_MOUSE]	55.24	3	3	5	14	105	12.0131	9.86182
O55042	Alpha-synuclein OS=Mus musculus GN=Snca PE=1 SV=2 - [SYUA_MOUSE]	55	1	9	13	24	140	14.4762	4.76709
P99024	Tubulin beta-5 chain OS=Mus musculus GN=Tubb5 PE=1 SV=1 - [TBB5_MOUSE]	54.95	2	2	24	564	444	49.639	4.89404
Q64433	10 kDa heat shock protein, mitochondrial OS=Mus musculus GN=Hspe1 PE=1 SV=2 - [CH10_MOUSE]	54.9	1	7	7	35	102	10.9559	8.35303
P17183	Gamma-enolase OS=Mus musculus GN=Eno2 PE=1 SV=2 - [ENOG_MOUSE]	53.46	10	22	27	182	434	47.267	5.10986
P52760	Ribonuclease UK114 OS=Mus musculus GN=Hrsp12 PE=1 SV=3 - [UK114_MOUSE]	53.33	1	6	6	30	135	14.2465	8.67529
A0A0N4SVQ1	Cytochrome c oxidase subunit NDUFA4 OS=Mus musculus GN=Ndufa4 PE=1 SV=1 - [A0A0N4SVQ1_MOUSE]	53.06	2	2	2	2	49	5.87291	8.47021
P60879	Synaptosomal-associated protein 25 OS=Mus musculus GN=Snap25 PE=1 SV=1 - [SNP25_MOUSE]	52.91	1	11	11	80	206	23.3002	4.76709
Q9D6F9	Tubulin beta-4A chain OS=Mus musculus GN=Tubb4a PE=1 SV=3 - [TBB4A_MOUSE]	52.7	1	6	25	613	444	49.5539	4.88135
P46660	Alpha-internexin OS=Mus musculus GN=Ina PE=1 SV=3 - [AINX_MOUSE]	51.1	1	34	39	226	501	55.3493	5.40186
P52503	NADH dehydrogenase [ubiquinone] iron-sulfur protein 6, mitochondrial OS=Mus musculus GN=Ndufs6 PE=1 SV=2 - [NDUS6_MOUSE]	50.86	1	4	4	14	116	13.0117	8.646
G5E923	V-type proton ATPase subunit G 2 OS=Mus musculus GN=Atp6v1g2 PE=1 SV=1 - [G5E923_MOUSE]	50.65	3	4	4	19	77	8.99946	9.0415
V9GX31	Peptidyl-prolyl cis-trans isomerase OS=Mus musculus GN=Gm12728 PE=1 SV=1 - [V9GX31_MOUSE]	50.65	2	1	2	3	77	8.55516	4.88135
Q9DBJ1	Phosphoglycerate mutase 1 OS=Mus musculus GN=Pgam1 PE=1 SV=3 - [PGAM1_MOUSE]	50	2	14	14	59	254	28.8139	7.18115
D3Z0Y2	Peroxiredoxin-6 OS=Mus musculus GN=Prdx6 PE=1 SV=1 - [D3Z0Y2_MOUSE]	50	4	9	9	31	200	22.4799	8.88037
Q9WV96	Mitochondrial import inner membrane translocase subunit Tim10 B OS=Mus musculus GN=Timm10b PE=1 SV=1 - [T10B_MOUSE]	50	7	3	3	5	100	11.3066	7.07861
P70296	Phosphatidylethanolamine-binding protein 1 OS=Mus musculus GN=Pebp1 PE=1 SV=3 - [PEBP1_MOUSE]	49.73	2	7	7	35	187	20.8173	5.40186
P52480	Pyruvate kinase PKM OS=Mus musculus GN=Pkm PE=1 SV=4 - [KPYM_MOUSE]	49.72	4	27	27	159	531	57.808	7.47412
P08551	Neurofilament light polypeptide OS=Mus musculus GN=Nefl PE=1 SV=5 - [NFL_MOUSE]	49.54	1	34	38	238	543	61.4711	4.64014
A0A0R4IZX8	Purkinje cell protein 2 OS=Mus musculus GN=Pcp2 PE=1 SV=1 - [A0A0R4IZX8_MOUSE]	49.49	5	4	4	19	99	10.7452	5.36377
P02802	Metallothionein-1 OS=Mus musculus GN=Mt1 PE=1 SV=1 - [MT1_MOUSE]	49.18	1	2	2	2	61	6.01316	7.95752
P60710	Actin, cytoplasmic 1 OS=Mus musculus GN=Actb PE=1 SV=1 - [ACTB_MOUSE]	49.07	12	8	23	269	375	41.7097	5.47803
Q60932	Voltage-dependent anion-selective channel protein 1 OS=Mus musculus GN=Vdac1 PE=1 SV=3 - [VDAC1_MOUSE]	48.99	2	11	12	56	296	32.3314	8.42627
Q9R0P9	Ubiquitin carboxyl-terminal hydrolase isozyme L1 OS=Mus musculus GN=Uchl1 PE=1 SV=1 - [UCHL1_MOUSE]	48.88	1	10	10	83	223	24.8224	5.23682
D3Z2H9	Protein Tpm3-rs7 OS=Mus musculus GN=Tpm3-rs7 PE=3 SV=1 - [D3Z2H9_MOUSE]	48.39	7	7	10	15	248	28.9737	4.80518
Q9CRB9	MICOS complex subunit Mic19 OS=Mus musculus GN=Chchd3 PE=1 SV=1 - [MIC19_MOUSE]	48.02	5	10	10	12	227	26.3182	8.36768
P63017	Heat shock cognate 71 kDa protein OS=Mus musculus GN=Hspa8 PE=1 SV=1 - [HSP7C_MOUSE]	47.83	4	27	35	337	646	70.8272	5.51611
P68368	Tubulin alpha-4A chain OS=Mus musculus GN=Tuba4a PE=1 SV=1 - [TBA4A_MOUSE]	47.54	7	7	20	186	448	49.8924	5.05908
Q60829	Protein phosphatase 1 regulatory subunit 1B OS=Mus musculus GN=Ppp1r1b PE=1 SV=2 - [PPR1B_MOUSE]	46.91	1	7	7	56	194	21.7673	4.65283
P62897	Cytochrome c, somatic OS=Mus musculus GN=Cycs PE=1 SV=2 - [CYC_MOUSE]	46.67	1	3	4	5	105	11.598	9.5835
Q9DCW4	Electron transfer flavoprotein subunit beta OS=Mus musculus GN=Etfb PE=1 SV=3 - [ETFB_MOUSE]	46.27	7	11	11	15	255	27.606	8.104
Q9CQB4	Cytochrome b-c1 complex subunit 7 OS=Mus musculus GN=Uqcrb PE=1 SV=1 - [Q9CQB4_MOUSE]	45.95	2	8	8	23	111	13.5529	9.11475
P29595	NEDD8 OS=Mus musculus GN=Nedd8 PE=1 SV=2 - [NEDD8_MOUSE]	45.68	1	2	2	4	81	8.96687	7.25439
A0A0N4SWI4	Protein FAM136A OS=Mus musculus GN=Fam136a PE=1 SV=1 - [A0A0N4SWI4_MOUSE]	45.35	2	3	3	5	86	9.7267	6.49365
P99029	Peroxiredoxin-5, mitochondrial OS=Mus musculus GN=Prdx5 PE=1 SV=2 - [PRDX5_MOUSE]	45.24	3	8	8	79	210	21.8835	8.85107
P56480	ATP synthase subunit beta, mitochondrial OS=Mus musculus GN=Atp5b PE=1 SV=2 - [ATPB_MOUSE]	45.18	1	23	23	429	529	56.2655	5.33838
Q9ERD7	Tubulin beta-3 chain OS=Mus musculus GN=Tubb3 PE=1 SV=1 - [TBB3_MOUSE]	44.89	3	5	22	557	450	50.3862	4.93213
P67778	Prohibitin OS=Mus musculus GN=Phb PE=1 SV=1 - [PHB_MOUSE]	44.49	2	10	10	29	272	29.8019	5.75732
Q9WVA2	Mitochondrial import inner membrane translocase subunit Tim8 A OS=Mus musculus GN=Timm8a1 PE=1 SV=1 - [TIM8A_MOUSE]	44.33	2	4	4	23	97	11.0353	5.16064
P09411	Phosphoglycerate kinase 1 OS=Mus musculus GN=Pgk1 PE=1 SV=4 - [PGK1_MOUSE]	44.12	3	20	20	125	417	44.522	7.89893
P05213	Tubulin alpha-1B chain OS=Mus musculus GN=Tuba1b PE=1 SV=2 - [TBA1B_MOUSE]	43.68	2	6	19	256	451	50.1196	5.05908
P01942	Hemoglobin subunit alpha OS=Mus musculus GN=Hba PE=1 SV=2 - [HBA_MOUSE]	43.66	2	7	7	172	142	15.0758	8.22119
P97450	ATP synthase-coupling factor 6, mitochondrial OS=Mus musculus GN=Atp5j PE=1 SV=1 - [ATP5J_MOUSE]	43.52	2	4	4	13	108	12.4886	9.36377
P63044	Vesicle-associated membrane protein 2 OS=Mus musculus GN=Vamp2 PE=1 SV=2 - [VAMP2_MOUSE]	43.1	3	3	4	19	116	12.6827	8.1333
Q9QXV0	ProSAAS OS=Mus musculus GN=Pcsk1n PE=1 SV=2 - [PCSK1_MOUSE]	42.64	1	13	13	123	258	27.2537	5.84619
P18760	Cofilin-1 OS=Mus musculus GN=Cfl1 PE=1 SV=3 - [COF1_MOUSE]	42.17	2	4	7	39	166	18.5477	8.08936
P62962	Profilin-1 OS=Mus musculus GN=Pfn1 PE=1 SV=2 - [PROF1_MOUSE]	42.14	2	4	4	8	140	14.9475	8.27979
E0CYS2	Voltage-gated potassium channel subunit beta-2 (Fragment) OS=Mus musculus GN=Kcnab2 PE=1 SV=1 - [E0CYS2_MOUSE]	42.11	4	1	1	1	38	4.24812	10.4185
P08228	Superoxide dismutase [Cu-Zn] OS=Mus musculus GN=Sod1 PE=1 SV=2 - [SODC_MOUSE]	41.56	1	4	4	7	154	15.9328	6.50732
Q05816	Fatty acid-binding protein, epidermal OS=Mus musculus GN=Fabp5 PE=1 SV=3 - [FABP5_MOUSE]	41.48	1	4	4	59	135	15.1274	6.53662
P60840	Alpha-endosulfine OS=Mus musculus GN=Ensa PE=1 SV=1 - [ENSA_MOUSE]	41.32	4	5	5	13	121	13.3267	7.23975
P17095	High mobility group protein HMG-I/HMG-Y OS=Mus musculus GN=Hmga1 PE=1 SV=4 - [HMGA1_MOUSE]	41.12	1	2	2	6	107	11.6071	10.3159
A2A6G9	LIM and SH3 domain protein 1 (Fragment) OS=Mus musculus GN=Lasp1 PE=1 SV=1 - [A2A6G9_MOUSE]	41.09	10	4	4	10	129	15.1434	8.86572
Q06185	ATP synthase subunit e, mitochondrial OS=Mus musculus GN=Atp5i PE=1 SV=2 - [ATP5I_MOUSE]	40.85	2	4	4	14	71	8.23047	9.34912
Q9DB20	ATP synthase subunit O, mitochondrial OS=Mus musculus GN=Atp5o PE=1 SV=1 - [ATPO_MOUSE]	40.85	3	11	11	41	213	23.3487	9.99365
D3Z1B8	Synaptotagmin-3 (Fragment) OS=Mus musculus GN=Syt3 PE=4 SV=1 - [D3Z1B8_MOUSE]	40.74	4	1	1	1	27	3.05447	4.729
A2A6Q3	Cdc42 effector protein 4 (Fragment) OS=Mus musculus GN=Cdc42ep4 PE=1 SV=1 - [A2A6Q3_MOUSE]	40.7	3	2	2	5	86	9.42084	9.979
Q91ZZ3	Beta-synuclein OS=Mus musculus GN=Sncb PE=1 SV=1 - [SYUB_MOUSE]	39.85	1	6	10	39	133	14.0429	4.37354
Q60605	Myosin light polypeptide 6 OS=Mus musculus GN=Myl6 PE=1 SV=3 - [MYL6_MOUSE]	39.74	8	5	5	37	151	16.9191	4.65283
Q9R1Q8	Transgelin-3 OS=Mus musculus GN=Tagln3 PE=1 SV=1 - [TAGL3_MOUSE]	39.7	2	8	8	16	199	22.4562	7.32764
P63038	60 kDa heat shock protein, mitochondrial OS=Mus musculus GN=Hspd1 PE=1 SV=1 - [CH60_MOUSE]	39.44	3	23	23	166	573	60.9174	6.17627
P50518	V-type proton ATPase subunit E 1 OS=Mus musculus GN=Atp6v1e1 PE=1 SV=2 - [VATE1_MOUSE]	39.38	4	12	12	72	226	26.1408	8.42627
Q04447	Creatine kinase B-type OS=Mus musculus GN=Ckb PE=1 SV=1 - [KCRB_MOUSE]	39.37	1	13	13	124	381	42.6863	5.66846
Q9JJV2	Profilin-2 OS=Mus musculus GN=Pfn2 PE=1 SV=3 - [PROF2_MOUSE]	39.29	2	6	6	52	140	15.0223	6.99072
Q03265	ATP synthase subunit alpha, mitochondrial OS=Mus musculus GN=Atp5a1 PE=1 SV=1 - [ATPA_MOUSE]	39.06	3	21	21	99	553	59.7156	9.18799
B1AXW5	Peroxiredoxin-1 (Fragment) OS=Mus musculus GN=Prdx1 PE=1 SV=8 - [B1AXW5_MOUSE]	39.05	6	5	5	21	169	18.8577	7.32764
P12787	Cytochrome c oxidase subunit 5A, mitochondrial OS=Mus musculus GN=Cox5a PE=1 SV=2 - [COX5A_MOUSE]	39.04	1	9	9	200	146	16.0913	6.53662
Q9D6T9	28S ribosomal protein S36, mitochondrial OS=Mus musculus GN=Mrps36 PE=1 SV=1 - [Q9D6T9_MOUSE]	39	2	5	5	18	100	10.9357	9.99365
P14152	Malate dehydrogenase, cytoplasmic OS=Mus musculus GN=Mdh1 PE=1 SV=3 - [MDHC_MOUSE]	38.92	2	13	13	70	334	36.4881	6.58057
P97315	Cysteine and glycine-rich protein 1 OS=Mus musculus GN=Csrp1 PE=1 SV=3 - [CSRP1_MOUSE]	38.86	1	6	6	11	193	20.5698	8.57275
P63101	14-3-3 protein zeta/delta OS=Mus musculus GN=Ywhaz PE=1 SV=1 - [1433Z_MOUSE]	38.78	3	10	11	120	245	27.7537	4.79248
Q9R1P4	Proteasome subunit alpha type-1 OS=Mus musculus GN=Psma1 PE=1 SV=1 - [PSA1_MOUSE]	38.78	2	9	9	20	263	29.5278	6.45557
Q9CZY3	Ubiquitin-conjugating enzyme E2 variant 1 OS=Mus musculus GN=Ube2v1 PE=1 SV=1 - [UB2V1_MOUSE]	38.78	4	2	4	11	147	16.3442	7.95752
Q9CQR2	40S ribosomal protein S21 OS=Mus musculus GN=Rps21 PE=1 SV=1 - [RS21_MOUSE]	38.55	1	6	6	16	83	9.13555	8.51416
A2A815	Protein deglycase DJ-1 (Fragment) OS=Mus musculus GN=Park7 PE=1 SV=8 - [A2A815_MOUSE]	38.52	5	6	6	9	135	14.2334	7.21045
A0A0N4SVT3	Guanine nucleotide-binding protein subunit gamma (Fragment) OS=Mus musculus GN=Gng12 PE=1 SV=1 - [A0A0N4SVT3_MOUSE]	38.46	3	2	2	2	65	7.19262	8.19189
P62814	V-type proton ATPase subunit B, brain isoform OS=Mus musculus GN=Atp6v1b2 PE=1 SV=1 - [VATB2_MOUSE]	38.36	3	19	19	93	511	56.5149	5.80811
Q9R0P5	Destrin OS=Mus musculus GN=Dstn PE=1 SV=3 - [DEST_MOUSE]	38.18	1	5	6	18	165	18.5095	7.97217
E9Q453	Tropomyosin alpha-1 chain OS=Mus musculus GN=Tpm1 PE=1 SV=1 - [E9Q453_MOUSE]	37.96	18	5	8	37	245	28.4656	4.77979
P62073	Mitochondrial import inner membrane translocase subunit Tim10 OS=Mus musculus GN=Timm10 PE=1 SV=1 - [TIM10_MOUSE]	37.78	1	6	6	8	90	10.3259	6.29053
P15105	Glutamine synthetase OS=Mus musculus GN=Glul PE=1 SV=6 - [GLNA_MOUSE]	37	3	14	14	74	373	42.0923	7.07861
P15532	Nucleoside diphosphate kinase A OS=Mus musculus GN=Nme1 PE=1 SV=1 - [NDKA_MOUSE]	36.84	5	5	5	11	152	17.1969	7.37158
Q7TQD2	Tubulin polymerization-promoting protein OS=Mus musculus GN=Tppp PE=1 SV=1 - [TPPP_MOUSE]	36.7	1	7	7	48	218	23.5601	9.42236
E9PV44	ATPase inhibitor, mitochondrial OS=Mus musculus GN=Atpif1 PE=1 SV=1 - [E9PV44_MOUSE]	36.49	1	1	2	4	74	8.78356	9.30518
Q9CQC7	NADH dehydrogenase [ubiquinone] 1 beta subcomplex subunit 4 OS=Mus musculus GN=Ndufb4 PE=1 SV=3 - [NDUB4_MOUSE]	36.43	1	4	4	6	129	15.072	9.89111
A2APX3	Cystatin (Fragment) OS=Mus musculus GN=Cst3 PE=1 SV=1 - [A2APX3_MOUSE]	36.27	2	2	2	6	102	11.1337	8.17725
A0A0R4J036	Neurofilament 3, medium OS=Mus musculus GN=Nefm PE=1 SV=1 - [A0A0R4J036_MOUSE]	36.08	3	33	38	103	848	95.8836	4.77979
O88935	Synapsin-1 OS=Mus musculus GN=Syn1 PE=1 SV=2 - [SYN1_MOUSE]	35.84	1	17	18	102	706	74.0516	9.80322
P16858	Glyceraldehyde-3-phosphate dehydrogenase OS=Mus musculus GN=Gapdh PE=1 SV=2 - [G3P_MOUSE]	35.74	7	1	10	250	333	35.7872	8.25049
S4R1W1	Glyceraldehyde-3-phosphate dehydrogenase OS=Mus musculus GN=Gm3839 PE=1 SV=1 - [S4R1W1_MOUSE]	35.74	3	1	10	205	333	35.7892	8.03076
G3UYV7	40S ribosomal protein S28 (Fragment) OS=Mus musculus GN=Rps28 PE=1 SV=1 - [G3UYV7_MOUSE]	35.71	3	1	1	10	56	6.34037	9.96436
D3YYN7	Sodium/potassium-transporting ATPase subunit alpha OS=Mus musculus GN=Atp1a2 PE=1 SV=1 - [D3YYN7_MOUSE]	35.69	2	18	34	376	947	103.52	5.43994
Q9CPQ1	Cytochrome c oxidase subunit 6C OS=Mus musculus GN=Cox6c PE=1 SV=3 - [COX6C_MOUSE]	35.53	2	3	3	4	76	8.46351	10.1401
Q9CWZ7	Gamma-soluble NSF attachment protein OS=Mus musculus GN=Napg PE=1 SV=1 - [SNAG_MOUSE]	35.26	2	10	10	20	312	34.7103	5.41455
P20152	Vimentin OS=Mus musculus GN=Vim PE=1 SV=3 - [VIME_MOUSE]	34.76	3	10	13	49	466	53.6551	5.12256
Q3TFT3	Coiled-coil-helix-coiled-coil-helix domain-containing protein 7 OS=Mus musculus GN=Chchd7 PE=1 SV=1 - [Q3TFT3_MOUSE]	34.62	5	1	1	2	52	6.36593	8.19189
Q99KI0	Aconitate hydratase, mitochondrial OS=Mus musculus GN=Aco2 PE=1 SV=1 - [ACON_MOUSE]	34.49	1	26	26	243	780	85.41	7.92822
P16125	L-lactate dehydrogenase B chain OS=Mus musculus GN=Ldhb PE=1 SV=2 - [LDHB_MOUSE]	34.43	3	12	13	55	334	36.549	6.04932
H3BKR2	Guanine nucleotide-binding protein G(I)/G(S)/G(T) subunit beta-1 (Fragment) OS=Mus musculus GN=Gnb1 PE=1 SV=8 - [H3BKR2_MOUSE]	34.43	3	9	9	65	273	30.1796	6.21436
B1AWE0	Clathrin light chain A OS=Mus musculus GN=Clta PE=1 SV=1 - [B1AWE0_MOUSE]	34.26	7	10	10	11	216	23.4643	4.50049
P30275	Creatine kinase U-type, mitochondrial OS=Mus musculus GN=Ckmt1 PE=1 SV=1 - [KCRU_MOUSE]	34.21	5	13	13	27	418	46.9742	8.1626
P27773	Protein disulfide-isomerase A3 OS=Mus musculus GN=Pdia3 PE=1 SV=2 - [PDIA3_MOUSE]	34.06	2	18	18	32	505	56.6427	6.21436
P17751	Triosephosphate isomerase OS=Mus musculus GN=Tpi1 PE=1 SV=4 - [TPIS_MOUSE]	33.78	2	13	13	139	299	32.1713	5.74463
Q9DCT8	Cysteine-rich protein 2 OS=Mus musculus GN=Crip2 PE=1 SV=1 - [CRIP2_MOUSE]	33.65	2	3	3	3	208	22.7121	8.63135
Q8VBV7	COP9 signalosome complex subunit 8 OS=Mus musculus GN=Cops8 PE=1 SV=1 - [CSN8_MOUSE]	33.49	2	5	5	10	209	23.241	5.19873
A2A6F8	60S ribosomal protein L23 (Fragment) OS=Mus musculus GN=Rpl23 PE=1 SV=1 - [A2A6F8_MOUSE]	33.33	2	1	1	2	60	6.20846	11.0483
P0DN34	NADH dehydrogenase [ubiquinone] 1 beta subcomplex subunit 1 OS=Mus musculus GN=Ndufb1 PE=3 SV=1 - [NDUB1_MOUSE]	33.33	1	3	3	4	57	6.94959	8.20654
P62264	40S ribosomal protein S14 OS=Mus musculus GN=Rps14 PE=1 SV=3 - [RS14_MOUSE]	33.11	3	4	4	5	151	16.2625	10.0522
Q8BXU5	Endophilin-A1 OS=Mus musculus GN=Sh3gl2 PE=1 SV=1 - [Q8BXU5_MOUSE]	33.06	5	5	7	75	245	27.9293	5.77002
Q6P1J1	Crmp1 protein OS=Mus musculus GN=Crmp1 PE=1 SV=1 - [Q6P1J1_MOUSE]	32.94	3	15	20	82	686	74.1744	6.81494
P63040	Complexin-1 OS=Mus musculus GN=Cplx1 PE=1 SV=1 - [CPLX1_MOUSE]	32.84	1	2	2	8	134	15.1125	4.97021
Q9DCG9	Multifunctional methyltransferase subunit TRM112-like protein OS=Mus musculus GN=Trmt112 PE=1 SV=1 - [TR112_MOUSE]	32.8	2	3	3	10	125	14.1323	5.2749
Q9DAK9	14 kDa phosphohistidine phosphatase OS=Mus musculus GN=Phpt1 PE=1 SV=1 - [PHP14_MOUSE]	32.26	1	4	4	4	124	13.9877	5.52881
Q922F4	Tubulin beta-6 chain OS=Mus musculus GN=Tubb6 PE=1 SV=1 - [TBB6_MOUSE]	32.21	3	1	16	211	447	50.0581	4.89404
P60761	Neurogranin OS=Mus musculus GN=Nrgn PE=1 SV=1 - [NEUG_MOUSE]	32.05	1	2	2	13	78	7.49151	7.04932
E9PZS4	NHP2-like protein 1 OS=Mus musculus GN=Nhp2l1 PE=1 SV=1 - [E9PZS4_MOUSE]	31.91	2	2	2	2	47	5.14464	8.80713
P03995	Glial fibrillary acidic protein OS=Mus musculus GN=Gfap PE=1 SV=4 - [GFAP_MOUSE]	31.86	1	13	13	30	430	49.8695	5.33838
G3UX26	Voltage-dependent anion-selective channel protein 2 (Fragment) OS=Mus musculus GN=Vdac2 PE=1 SV=1 - [G3UX26_MOUSE]	31.8	4	5	6	20	283	30.427	7.57666
Q6PIC6	Sodium/potassium-transporting ATPase subunit alpha-3 OS=Mus musculus GN=Atp1a3 PE=1 SV=1 - [AT1A3_MOUSE]	31.69	3	22	38	533	1013	111.62	5.41455
D6RCW7	F-actin-capping protein subunit alpha-2 OS=Mus musculus GN=Capza2 PE=1 SV=1 - [D6RCW7_MOUSE]	31.61	3	3	4	5	174	19.9828	5.2749
Q9CPQ9	Fructose-bisphosphate aldolase OS=Mus musculus GN=Aldoart1 PE=1 SV=1 - [Q9CPQ9_MOUSE]	31.59	2	2	13	52	364	39.2601	7.37158
P62075	Mitochondrial import inner membrane translocase subunit Tim13 OS=Mus musculus GN=Timm13 PE=1 SV=1 - [TIM13_MOUSE]	31.58	1	3	3	3	95	10.4509	8.17725
P48758	Carbonyl reductase [NADPH] 1 OS=Mus musculus GN=Cbr1 PE=1 SV=3 - [CBR1_MOUSE]	31.41	2	8	9	17	277	30.622	8.30908
P62983	Ubiquitin-40S ribosomal protein S27a OS=Mus musculus GN=Rps27a PE=1 SV=2 - [RS27A_MOUSE]	31.41	11	4	4	5	156	17.9395	9.64209
Q61171	Peroxiredoxin-2 OS=Mus musculus GN=Prdx2 PE=1 SV=3 - [PRDX2_MOUSE]	31.31	2	5	5	28	198	21.7651	5.41455
Q61411	GTPase HRas OS=Mus musculus GN=Hras PE=1 SV=2 - [RASH_MOUSE]	31.22	12	4	4	7	189	21.2846	5.31299
P61982	14-3-3 protein gamma OS=Mus musculus GN=Ywhag PE=1 SV=2 - [1433G_MOUSE]	31.17	2	8	12	75	247	28.2849	4.89404
P05201	Aspartate aminotransferase, cytoplasmic OS=Mus musculus GN=Got1 PE=1 SV=3 - [AATC_MOUSE]	30.99	2	11	11	35	413	46.2185	7.13721
P07724	Serum albumin OS=Mus musculus GN=Alb PE=1 SV=3 - [ALBU_MOUSE]	30.92	1	18	18	124	608	68.6477	6.07471
G3UZ60	Small ubiquitin-related modifier 3 OS=Mus musculus GN=Sumo3 PE=1 SV=1 - [G3UZ60_MOUSE]	30.67	10	2	2	11	75	8.59637	9.20264
Q9DBP5	UMP-CMP kinase OS=Mus musculus GN=Cmpk1 PE=1 SV=1 - [KCY_MOUSE]	30.61	2	5	5	5	196	22.1513	5.8335
P63268	Actin, gamma-enteric smooth muscle OS=Mus musculus GN=Actg2 PE=1 SV=1 - [ACTH_MOUSE]	30.59	10	1	16	236	376	41.8498	5.47803
Q8BGD8	Cytochrome c oxidase assembly factor 6 homolog OS=Mus musculus GN=Coa6 PE=1 SV=1 - [COA6_MOUSE]	30.38	1	2	2	3	79	9.29235	8.1626
B7ZC21	cAMP-dependent protein kinase inhibitor gamma (Fragment) OS=Mus musculus GN=Pkig PE=1 SV=1 - [B7ZC21_MOUSE]	30.36	3	1	1	1	56	5.93273	4.28467
Q9CRB6	Tubulin polymerization-promoting protein family member 3 OS=Mus musculus GN=Tppp3 PE=1 SV=1 - [TPPP3_MOUSE]	30.11	1	5	5	5	176	18.9537	9.11475
Q9D051	Pyruvate dehydrogenase E1 component subunit beta, mitochondrial OS=Mus musculus GN=Pdhb PE=1 SV=1 - [ODPB_MOUSE]	30.08	1	13	13	74	359	38.912	6.87354
P60335	Poly(rC)-binding protein 1 OS=Mus musculus GN=Pcbp1 PE=1 SV=1 - [PCBP1_MOUSE]	30.06	3	4	8	43	356	37.4739	7.09326
O70591	Prefoldin subunit 2 OS=Mus musculus GN=Pfdn2 PE=1 SV=2 - [PFD2_MOUSE]	29.87	2	4	4	9	154	16.5236	6.58057
F6VQ81	Tumor protein D54 (Fragment) OS=Mus musculus GN=Tpd52l2 PE=1 SV=1 - [F6VQ81_MOUSE]	29.81	7	4	4	4	161	17.7181	8.19189
Q91XV3	Brain acid soluble protein 1 OS=Mus musculus GN=Basp1 PE=1 SV=3 - [BASP1_MOUSE]	29.65	1	2	2	3	226	22.0736	4.51318
P19783	Cytochrome c oxidase subunit 4 isoform 1, mitochondrial OS=Mus musculus GN=Cox4i1 PE=1 SV=2 - [COX41_MOUSE]	29.59	2	3	3	3	169	19.5179	9.23193
Q9DB77	Cytochrome b-c1 complex subunit 2, mitochondrial OS=Mus musculus GN=Uqcrc2 PE=1 SV=1 - [QCR2_MOUSE]	29.58	2	13	13	35	453	48.205	9.24658
Q9R0Y5	Adenylate kinase isoenzyme 1 OS=Mus musculus GN=Ak1 PE=1 SV=1 - [KAD1_MOUSE]	29.38	3	5	5	18	194	21.5261	5.80811
Q9CQV8	14-3-3 protein beta/alpha OS=Mus musculus GN=Ywhab PE=1 SV=3 - [1433B_MOUSE]	29.27	3	3	7	33	246	28.0689	4.83057
Q5SQB0	Nucleophosmin OS=Mus musculus GN=Npm1 PE=1 SV=1 - [Q5SQB0_MOUSE]	29.17	5	5	5	11	264	29.5062	4.58936
A0A0U1RPR4	CD2 antigen cytoplasmic tail-binding protein 2 (Fragment) OS=Mus musculus GN=Cd2bp2 PE=1 SV=1 - [A0A0U1RPR4_MOUSE]	29.17	5	1	1	1	48	5.07665	8.54346
P84086	Complexin-2 OS=Mus musculus GN=Cplx2 PE=1 SV=1 - [CPLX2_MOUSE]	29.1	1	2	2	6	134	15.3847	5.08447
P43277	Histone H1.3 OS=Mus musculus GN=Hist1h1d PE=1 SV=2 - [H13_MOUSE]	28.96	5	3	11	26	221	22.0861	11.0337
P62242	40S ribosomal protein S8 OS=Mus musculus GN=Rps8 PE=1 SV=2 - [RS8_MOUSE]	28.85	1	4	4	13	208	24.1902	10.3159
Q01853	Transitional endoplasmic reticulum ATPase OS=Mus musculus GN=Vcp PE=1 SV=4 - [TERA_MOUSE]	28.78	8	23	23	81	806	89.2657	5.26221
P43274	Histone H1.4 OS=Mus musculus GN=Hist1h1e PE=1 SV=2 - [H14_MOUSE]	28.77	4	2	10	27	219	21.964	11.1069
Q91WS0	CDGSH iron-sulfur domain-containing protein 1 OS=Mus musculus GN=Cisd1 PE=1 SV=1 - [CISD1_MOUSE]	28.7	1	2	2	2	108	12.0892	9.05615
P23506	Protein-L-isoaspartate(D-aspartate) O-methyltransferase OS=Mus musculus GN=Pcmt1 PE=1 SV=3 - [PIMT_MOUSE]	28.63	6	4	4	16	227	24.6186	7.6499
P56812	Programmed cell death protein 5 OS=Mus musculus GN=Pdcd5 PE=1 SV=3 - [PDCD5_MOUSE]	28.57	2	3	3	10	126	14.2663	5.68115
Q9QUR7	Peptidyl-prolyl cis-trans isomerase NIMA-interacting 1 OS=Mus musculus GN=Pin1 PE=1 SV=1 - [PIN1_MOUSE]	28.48	2	5	5	12	165	18.3591	8.79248
P11499	Heat shock protein HSP 90-beta OS=Mus musculus GN=Hsp90ab1 PE=1 SV=3 - [HS90B_MOUSE]	28.31	14	12	19	43	724	83.2291	5.03369
Q8QZT1	Acetyl-CoA acetyltransferase, mitochondrial OS=Mus musculus GN=Acat1 PE=1 SV=1 - [THIL_MOUSE]	28.3	1	7	7	18	424	44.7873	8.51416
O08972	Dimethylarginine dimethylaminohydrolase 2, isoform CRA_a OS=Mus musculus GN=Ddah2 PE=1 SV=1 - [O08972_MOUSE]	28.28	3	7	7	9	244	25.3521	6.06201
P99028	Cytochrome b-c1 complex subunit 6, mitochondrial OS=Mus musculus GN=Uqcrh PE=1 SV=2 - [QCR6_MOUSE]	28.09	1	2	2	3	89	10.428	4.86865
F8WIA3	Protein Gm20604 OS=Mus musculus GN=Gm20604 PE=4 SV=1 - [F8WIA3_MOUSE]	28	4	1	1	2	75	7.88964	4.09424
Q8VDN2	Sodium/potassium-transporting ATPase subunit alpha-1 OS=Mus musculus GN=Atp1a1 PE=1 SV=1 - [AT1A1_MOUSE]	27.96	1	13	27	306	1023	112.91	5.45264
Q9D6R2	Isocitrate dehydrogenase [NAD] subunit alpha, mitochondrial OS=Mus musculus GN=Idh3a PE=1 SV=1 - [IDH3A_MOUSE]	27.87	1	16	16	93	366	39.6131	6.72705
Q9WTP7	GTP:AMP phosphotransferase AK3, mitochondrial OS=Mus musculus GN=Ak3 PE=1 SV=3 - [KAD3_MOUSE]	27.75	1	6	6	6	227	25.4105	8.83643
P05202	Aspartate aminotransferase, mitochondrial OS=Mus musculus GN=Got2 PE=1 SV=1 - [AATM_MOUSE]	27.67	1	12	12	55	430	47.3812	8.99756
Q61644	Protein kinase C and casein kinase substrate in neurons protein 1 OS=Mus musculus GN=Pacsin1 PE=1 SV=1 - [PACN1_MOUSE]	27.66	1	11	11	37	441	50.5435	5.23682
O89086	RNA-binding protein 3 OS=Mus musculus GN=Rbm3 PE=1 SV=1 - [RBM3_MOUSE]	27.45	3	3	3	5	153	16.5947	7.50342
Q14BB9	MAP6 domain-containing protein 1 OS=Mus musculus GN=Map6d1 PE=1 SV=1 - [MA6D1_MOUSE]	27.23	1	3	3	6	191	20.4202	9.87646
P20029	78 kDa glucose-regulated protein OS=Mus musculus GN=Hspa5 PE=1 SV=3 - [GRP78_MOUSE]	27.18	1	14	16	58	655	72.3775	5.16064
P62869	Transcription elongation factor B polypeptide 2 OS=Mus musculus GN=Tceb2 PE=1 SV=1 - [ELOB_MOUSE]	27.12	1	2	2	2	118	13.1616	5.0083
O55023	Inositol monophosphatase 1 OS=Mus musculus GN=Impa1 PE=1 SV=1 - [IMPA1_MOUSE]	27.08	5	7	7	11	277	30.4162	5.18604
A0A0R4J023	Methylglutaconyl-CoA hydratase, mitochondrial OS=Mus musculus GN=Auh PE=1 SV=1 - [A0A0R4J023_MOUSE]	27.07	7	6	6	10	314	33.317	9.42236
Q62188	Dihydropyrimidinase-related protein 3 OS=Mus musculus GN=Dpysl3 PE=1 SV=1 - [DPYL3_MOUSE]	27.02	5	10	14	93	570	61.8971	6.49365
Q9D8S9	BolA-like protein 1 OS=Mus musculus GN=Bola1 PE=1 SV=1 - [BOLA1_MOUSE]	27.01	1	3	3	6	137	14.3703	8.76318
P10922	Histone H1.0 OS=Mus musculus GN=H1f0 PE=2 SV=4 - [H10_MOUSE]	26.8	1	5	5	6	194	20.8482	10.9019
A0A0G2JGJ1	Dihydropteridine reductase OS=Mus musculus GN=Qdpr PE=1 SV=1 - [A0A0G2JGJ1_MOUSE]	26.76	6	5	5	11	213	22.3322	8.68994
Q9DCS9	NADH dehydrogenase [ubiquinone] 1 beta subcomplex subunit 10 OS=Mus musculus GN=Ndufb10 PE=1 SV=3 - [NDUBA_MOUSE]	26.7	2	6	6	8	176	21.0104	8.03076
E9Q6M6	Mitochondrial glutamate carrier 1 OS=Mus musculus GN=Slc25a22 PE=1 SV=1 - [E9Q6M6_MOUSE]	26.64	13	6	6	11	229	24.6238	8.60205
P68254	14-3-3 protein theta OS=Mus musculus GN=Ywhaq PE=1 SV=1 - [1433T_MOUSE]	26.53	4	6	8	33	245	27.7608	4.77979
Q9JJZ2	Tubulin alpha-8 chain OS=Mus musculus GN=Tuba8 PE=1 SV=1 - [TBA8_MOUSE]	26.5	1	4	11	136	449	50.0195	5.09717
Q9CZ13	Cytochrome b-c1 complex subunit 1, mitochondrial OS=Mus musculus GN=Uqcrc1 PE=1 SV=2 - [QCR1_MOUSE]	26.46	2	14	14	89	480	52.8185	6.21436
P62259	14-3-3 protein epsilon OS=Mus musculus GN=Ywhae PE=1 SV=1 - [1433E_MOUSE]	26.27	3	5	6	20	255	29.1554	4.7417
P18872	Guanine nucleotide-binding protein G(o) subunit alpha OS=Mus musculus GN=Gnao1 PE=1 SV=3 - [GNAO_MOUSE]	26.27	17	7	10	61	354	40.0589	5.52881
O35098	Dihydropyrimidinase-related protein 4 OS=Mus musculus GN=Dpysl4 PE=1 SV=1 - [DPYL4_MOUSE]	26.05	3	12	14	30	572	61.9225	6.97607
D3Z550	Epsin-1 (Fragment) OS=Mus musculus GN=Epn1 PE=4 SV=1 - [D3Z550_MOUSE]	25.93	4	1	1	1	54	6.04593	5.87158
O88952	Protein lin-7 homolog C OS=Mus musculus GN=Lin7c PE=1 SV=2 - [LIN7C_MOUSE]	25.89	1	3	4	5	197	21.8205	8.42627
Q9WV98	Mitochondrial import inner membrane translocase subunit Tim9 OS=Mus musculus GN=Timm9 PE=1 SV=1 - [TIM9_MOUSE]	25.84	1	2	2	5	89	10.3372	7.21045
Q9ERT9	Protein phosphatase 1 regulatory subunit 1A OS=Mus musculus GN=Ppp1r1a PE=1 SV=1 - [PPR1A_MOUSE]	25.73	1	3	3	9	171	18.7062	5.24951
D3YUT3	40S ribosomal protein S19 (Fragment) OS=Mus musculus GN=Rps19 PE=1 SV=2 - [D3YUT3_MOUSE]	25.56	6	3	3	3	133	14.8869	10.3452
E9Q4Q8	Protein Pfdn4 (Fragment) OS=Mus musculus GN=Pfdn4 PE=1 SV=1 - [E9Q4Q8_MOUSE]	25.53	5	1	1	2	47	5.42652	4.09424
O35143	ATPase inhibitor, mitochondrial OS=Mus musculus GN=Atpif1 PE=1 SV=2 - [ATIF1_MOUSE]	25.47	1	1	2	7	106	12.1513	9.64209
P26443	Glutamate dehydrogenase 1, mitochondrial OS=Mus musculus GN=Glud1 PE=1 SV=1 - [DHE3_MOUSE]	25.45	2	16	16	75	558	61.2982	8.00146
D3Z1Q3	Mth938 domain-containing protein OS=Mus musculus GN=Aamdc PE=1 SV=1 - [D3Z1Q3_MOUSE]	25.42	8	2	2	2	118	13.0357	7.97217
Q99N15	17beta-hydroxysteroid dehydrogenase type 10/short chain L-3-hydroxyacyl-CoA dehydrogenase OS=Mus musculus GN=Hsd17b10 PE=1 SV=1 - [Q99N15_MOUSE]	25.29	3	4	4	7	261	27.2566	8.76318
B1ARW4	NADH dehydrogenase [ubiquinone] iron-sulfur protein 5 (Fragment) OS=Mus musculus GN=Ndufs5 PE=1 SV=1 - [B1ARW4_MOUSE]	25.27	2	3	3	3	91	10.9015	8.93896
P99027	60S acidic ribosomal protein P2 OS=Mus musculus GN=Rplp2 PE=1 SV=3 - [RLA2_MOUSE]	25.22	1	2	2	3	115	11.6438	4.53857
Q03958	Prefoldin subunit 6 OS=Mus musculus GN=Pfdn6 PE=1 SV=1 - [PFD6_MOUSE]	25.2	2	2	2	3	127	14.4457	8.88037
Q9DCJ5	NADH dehydrogenase [ubiquinone] 1 alpha subcomplex subunit 8 OS=Mus musculus GN=Ndufa8 PE=1 SV=3 - [NDUA8_MOUSE]	25	1	3	3	7	172	19.9791	8.45557
Q8R464	Cell adhesion molecule 4 OS=Mus musculus GN=Cadm4 PE=1 SV=1 - [CADM4_MOUSE]	25	1	6	6	19	388	42.6968	6.30322
A2AWI7	Endophilin-B2 OS=Mus musculus GN=Sh3glb2 PE=1 SV=1 - [A2AWI7_MOUSE]	25	3	9	9	19	404	44.88	5.57959
A0A0G2JE27	F-actin-capping protein subunit alpha-1 (Fragment) OS=Mus musculus GN=Capza1 PE=1 SV=4 - [A0A0G2JE27_MOUSE]	25	3	1	2	3	112	13.0904	5.08447
O08997	Copper transport protein ATOX1 OS=Mus musculus GN=Atox1 PE=1 SV=1 - [ATOX1_MOUSE]	25	1	1	1	1	68	7.33366	6.50732
E9QN08	Elongation factor 1-delta (Fragment) OS=Mus musculus GN=Eef1d PE=1 SV=1 - [E9QN08_MOUSE]	24.9	11	4	4	6	245	27.2009	5.46533
P97807	Fumarate hydratase, mitochondrial OS=Mus musculus GN=Fh PE=1 SV=3 - [FUMH_MOUSE]	24.85	2	9	9	70	507	54.3221	9.0415
Q9CQA3	Succinate dehydrogenase [ubiquinone] iron-sulfur subunit, mitochondrial OS=Mus musculus GN=Sdhb PE=1 SV=1 - [SDHB_MOUSE]	24.82	1	8	8	26	282	31.7929	8.67529
A0A0A6YXT4	Centrosomal protein of 170 kDa (Fragment) OS=Mus musculus GN=Cep170 PE=1 SV=1 - [A0A0A6YXT4_MOUSE]	24.68	3	1	1	1	158	17.3803	5.52881
Q99KJ8	Dynactin subunit 2 OS=Mus musculus GN=Dctn2 PE=1 SV=3 - [DCTN2_MOUSE]	24.63	1	9	9	22	402	44.0897	5.26221
Q9D6J6	NADH dehydrogenase [ubiquinone] flavoprotein 2, mitochondrial OS=Mus musculus GN=Ndufv2 PE=1 SV=2 - [NDUV2_MOUSE]	24.6	2	3	3	19	248	27.2679	7.40088
P28663	Beta-soluble NSF attachment protein OS=Mus musculus GN=Napb PE=1 SV=2 - [SNAB_MOUSE]	24.5	2	6	6	24	298	33.5355	5.46533
P38647	Stress-70 protein, mitochondrial OS=Mus musculus GN=Hspa9 PE=1 SV=3 - [GRP75_MOUSE]	24.45	1	15	15	46	679	73.4156	6.07471
H3BKD0	Heterogeneous nuclear ribonucleoprotein K (Fragment) OS=Mus musculus GN=Hnrnpk PE=1 SV=1 - [H3BKD0_MOUSE]	24.41	11	8	8	54	299	33.1767	7.31299
P48722	Heat shock 70 kDa protein 4L OS=Mus musculus GN=Hspa4l PE=1 SV=2 - [HS74L_MOUSE]	24.34	4	16	18	46	838	94.3225	5.74463
P61089	Ubiquitin-conjugating enzyme E2 N OS=Mus musculus GN=Ube2n PE=1 SV=1 - [UBE2N_MOUSE]	24.34	1	3	3	12	152	17.127	6.56592
D3Z5W4	Actin-like protein 6B (Fragment) OS=Mus musculus GN=Actl6b PE=1 SV=8 - [D3Z5W4_MOUSE]	24.32	3	1	1	1	74	8.69235	7.38623
O35683	NADH dehydrogenase [ubiquinone] 1 alpha subcomplex subunit 1 OS=Mus musculus GN=Ndufa1 PE=1 SV=1 - [NDUA1_MOUSE]	24.29	1	2	2	2	70	8.13323	9.48096
F2Z483	T-complex protein 1 subunit alpha OS=Mus musculus GN=Tcp1 PE=1 SV=1 - [F2Z483_MOUSE]	24.27	2	2	2	6	103	10.9565	4.66553
Q99KR7	Peptidyl-prolyl cis-trans isomerase F, mitochondrial OS=Mus musculus GN=Ppif PE=1 SV=1 - [PPIF_MOUSE]	24.27	1	4	4	12	206	21.723	9.15869
P35979	60S ribosomal protein L12 OS=Mus musculus GN=Rpl12 PE=1 SV=2 - [RL12_MOUSE]	24.24	2	4	4	16	165	17.7935	9.42236
F6TEU8	Adenylate kinase 4, mitochondrial (Fragment) OS=Mus musculus GN=Ak4 PE=1 SV=1 - [F6TEU8_MOUSE]	24.11	3	3	3	9	141	16.3494	8.14795
Q62418	Drebrin-like protein OS=Mus musculus GN=Dbnl PE=1 SV=2 - [DBNL_MOUSE]	24.08	1	8	8	27	436	48.6696	4.91943
A0A140T8L5	Protein Rps2-ps6 OS=Mus musculus GN=Rps2-ps6 PE=3 SV=1 - [A0A140T8L5_MOUSE]	23.98	8	5	5	8	221	24.185	9.78857
A0A0A6YVU1	ADP-sugar pyrophosphatase (Fragment) OS=Mus musculus GN=Nudt5 PE=1 SV=1 - [A0A0A6YVU1_MOUSE]	23.86	3	2	2	3	88	9.96717	9.15869
P63028	Translationally-controlled tumor protein OS=Mus musculus GN=Tpt1 PE=1 SV=1 - [TCTP_MOUSE]	23.84	2	4	4	6	172	19.4496	4.85596
P00015	Cytochrome c, testis-specific OS=Mus musculus GN=Cyct PE=1 SV=3 - [CYC2_MOUSE]	23.81	1	4	5	25	105	11.706	9.51025
D6RG53	Eukaryotic translation initiation factor 6 OS=Mus musculus GN=Eif6 PE=1 SV=1 - [D6RG53_MOUSE]	23.73	4	1	1	1	59	6.83633	9.5542
Q8BWT1	3-ketoacyl-CoA thiolase, mitochondrial OS=Mus musculus GN=Acaa2 PE=1 SV=3 - [THIM_MOUSE]	23.68	1	5	5	8	397	41.8034	8.08936
D3Z3Y3	Single-stranded DNA-binding protein, mitochondrial (Fragment) OS=Mus musculus GN=Ssbp1 PE=1 SV=1 - [D3Z3Y3_MOUSE]	23.68	3	2	2	2	76	8.78853	9.93506
F7BP55	Adenylate kinase 2, mitochondrial (Fragment) OS=Mus musculus GN=Ak2 PE=1 SV=1 - [F7BP55_MOUSE]	23.61	2	1	1	1	72	7.38791	8.93896
Q9Z2I9	Succinate--CoA ligase [ADP-forming] subunit beta, mitochondrial OS=Mus musculus GN=Sucla2 PE=1 SV=2 - [SUCB1_MOUSE]	23.54	1	13	13	42	463	50.0821	7.00537
P19536	Cytochrome c oxidase subunit 5B, mitochondrial OS=Mus musculus GN=Cox5b PE=1 SV=1 - [COX5B_MOUSE]	23.44	2	3	3	5	128	13.8039	8.38232
O08599	Syntaxin-binding protein 1 OS=Mus musculus GN=Stxbp1 PE=1 SV=2 - [STXB1_MOUSE]	23.4	2	15	15	67	594	67.5259	6.96143
P35486	Pyruvate dehydrogenase E1 component subunit alpha, somatic form, mitochondrial OS=Mus musculus GN=Pdha1 PE=1 SV=1 - [ODPA_MOUSE]	23.33	2	11	11	20	390	43.2036	8.19189
P40142	Transketolase OS=Mus musculus GN=Tkt PE=1 SV=1 - [TKT_MOUSE]	23.27	4	13	13	67	623	67.5876	7.50342
Q91VD9	NADH-ubiquinone oxidoreductase 75 kDa subunit, mitochondrial OS=Mus musculus GN=Ndufs1 PE=1 SV=2 - [NDUS1_MOUSE]	23.25	5	18	18	64	727	79.7256	5.71924
P63011	Ras-related protein Rab-3A OS=Mus musculus GN=Rab3a PE=1 SV=1 - [RAB3A_MOUSE]	23.18	39	4	5	32	220	24.9541	5.03369
O35295	Transcriptional activator protein Pur-beta OS=Mus musculus GN=Purb PE=1 SV=3 - [PURB_MOUSE]	23.15	1	5	6	9	324	33.8808	5.42725
E9PZB3	Protein Gm5093 OS=Mus musculus GN=Gm5093 PE=1 SV=1 - [E9PZB3_MOUSE]	22.99	4	4	4	4	174	19.8634	9.51025
F6UI99	Actin-binding LIM protein 2 (Fragment) OS=Mus musculus GN=Ablim2 PE=1 SV=1 - [F6UI99_MOUSE]	22.94	7	3	3	4	170	19.1193	9.02686
P63001	Ras-related C3 botulinum toxin substrate 1 OS=Mus musculus GN=Rac1 PE=1 SV=1 - [RAC1_MOUSE]	22.92	3	1	4	7	192	21.4362	8.49951
Q8BWF0	Succinate-semialdehyde dehydrogenase, mitochondrial OS=Mus musculus GN=Aldh5a1 PE=1 SV=1 - [SSDH_MOUSE]	22.75	1	8	8	48	523	55.9328	8.25049
P47757	F-actin-capping protein subunit beta OS=Mus musculus GN=Capzb PE=1 SV=3 - [CAPZB_MOUSE]	22.74	3	5	5	5	277	31.3258	5.74463
P63216	Guanine nucleotide-binding protein G(I)/G(S)/G(O) subunit gamma-3 OS=Mus musculus GN=Gng3 PE=1 SV=1 - [GBG3_MOUSE]	22.67	1	1	1	3	75	8.29916	7.78174
A0A0G2JGL7	Annexin A3 (Fragment) OS=Mus musculus GN=Anxa3 PE=1 SV=1 - [A0A0G2JGL7_MOUSE]	22.62	3	1	1	1	84	9.41186	6.53662
A0A087WNP6	Protein CDV3 OS=Mus musculus GN=Cdv3 PE=1 SV=1 - [A0A087WNP6_MOUSE]	22.55	5	2	2	17	235	24.1816	5.85889
Q3UM45	Protein phosphatase 1 regulatory subunit 7 OS=Mus musculus GN=Ppp1r7 PE=1 SV=2 - [PP1R7_MOUSE]	22.44	2	8	8	14	361	41.2665	4.91943
P42669	Transcriptional activator protein Pur-alpha OS=Mus musculus GN=Pura PE=1 SV=1 - [PURA_MOUSE]	22.43	1	4	5	6	321	34.8624	6.44287
A0A0N4SUV3	Vesicle-associated membrane protein 1 (Fragment) OS=Mus musculus GN=Vamp1 PE=1 SV=1 - [A0A0N4SUV3_MOUSE]	22.41	3	2	3	7	116	12.5304	7.95752
P16330	2',3'-cyclic-nucleotide 3'-phosphodiesterase OS=Mus musculus GN=Cnp PE=1 SV=3 - [CN37_MOUSE]	22.38	1	9	9	12	420	47.0935	8.96826
D3Z497	Protein Gm7075 OS=Mus musculus GN=Gm7075 PE=4 SV=1 - [D3Z497_MOUSE]	22.32	2	2	2	2	112	12.6437	6.69775
P45591	Cofilin-2 OS=Mus musculus GN=Cfl2 PE=1 SV=1 - [COF2_MOUSE]	22.29	1	2	5	34	166	18.6978	7.88428
Q9D2G2	Dihydrolipoyllysine-residue succinyltransferase component of 2-oxoglutarate dehydrogenase complex, mitochondrial OS=Mus musculus GN=Dlst PE=1 SV=1 - [ODO2_MOUSE]	22.25	1	7	7	34	454	48.9635	8.95361
O08749	Dihydrolipoyl dehydrogenase, mitochondrial OS=Mus musculus GN=Dld PE=1 SV=2 - [DLDH_MOUSE]	22.2	1	11	11	32	509	54.2382	7.89893
Q8K183	Pyridoxal kinase OS=Mus musculus GN=Pdxk PE=1 SV=1 - [PDXK_MOUSE]	22.12	2	7	7	14	312	34.9927	6.29053
P17156	Heat shock-related 70 kDa protein 2 OS=Mus musculus GN=Hspa2 PE=1 SV=2 - [HSP72_MOUSE]	22.12	1	3	11	69	633	69.5987	5.66846
B1AVF2	TSC22 domain family protein 3 OS=Mus musculus GN=Tsc22d3 PE=1 SV=1 - [B1AVF2_MOUSE]	22.12	2	1	1	2	113	12.5544	4.67822
D3Z1M1	Guanine nucleotide-binding protein G(I)/G(S)/G(T) subunit beta-2 (Fragment) OS=Mus musculus GN=Gnb2 PE=1 SV=1 - [D3Z1M1_MOUSE]	22.03	6	3	4	14	227	25.0093	7.34229
Q9D3D9	ATP synthase subunit delta, mitochondrial OS=Mus musculus GN=Atp5d PE=1 SV=1 - [ATPD_MOUSE]	22.02	1	4	4	53	168	17.5891	5.08447
Q9D1L9	Ragulator complex protein LAMTOR5 OS=Mus musculus GN=Lamtor5 PE=1 SV=1 - [LTOR5_MOUSE]	21.98	2	1	1	1	91	9.63572	4.86865
Q9Z0S1	3'(2'),5'-bisphosphate nucleotidase 1 OS=Mus musculus GN=Bpnt1 PE=1 SV=2 - [BPNT1_MOUSE]	21.75	4	4	4	9	308	33.1751	5.8208
D3YV69	Ras-related protein Rab-6A OS=Mus musculus GN=Rab6a PE=1 SV=1 - [D3YV69_MOUSE]	21.71	40	3	4	7	175	19.949	5.07178
P07901	Heat shock protein HSP 90-alpha OS=Mus musculus GN=Hsp90aa1 PE=1 SV=4 - [HS90A_MOUSE]	21.69	10	9	15	27	733	84.7348	5.0083
D3Z637	MCG10134, isoform CRA_c OS=Mus musculus GN=Tpd52 PE=1 SV=1 - [D3Z637_MOUSE]	21.6	6	3	3	5	162	17.592	5.26221
A0A087WNW2	Neurofascin OS=Mus musculus GN=Nfasc PE=1 SV=1 - [A0A087WNW2_MOUSE]	21.58	6	15	15	20	899	101.103	8.41162
O88569	Heterogeneous nuclear ribonucleoproteins A2/B1 OS=Mus musculus GN=Hnrnpa2b1 PE=1 SV=2 - [ROA2_MOUSE]	21.53	2	9	9	123	353	37.3797	8.95361
P84096	Rho-related GTP-binding protein RhoG OS=Mus musculus GN=Rhog PE=1 SV=1 - [RHOG_MOUSE]	21.47	1	3	3	5	191	21.2949	8.11865
Q8C0M9	Isoaspartyl peptidase/L-asparaginase OS=Mus musculus GN=Asrgl1 PE=1 SV=1 - [ASGL1_MOUSE]	21.47	1	5	5	22	326	33.9284	7.6499
Q9D172	ES1 protein homolog, mitochondrial OS=Mus musculus GN=D10Jhu81e PE=1 SV=1 - [ES1_MOUSE]	21.43	1	6	6	14	266	28.0728	8.77783
P97352	Protein S100-A13 OS=Mus musculus GN=S100a13 PE=1 SV=1 - [S10AD_MOUSE]	21.43	2	2	2	4	98	11.1509	6.12549
A0A0A0MQC7	Microtubule-associated protein OS=Mus musculus GN=Mapt PE=1 SV=1 - [A0A0A0MQC7_MOUSE]	21.42	5	13	13	59	733	76.2132	6.78564
P62806	Histone H4 OS=Mus musculus GN=Hist1h4a PE=1 SV=2 - [H4_MOUSE]	21.36	1	2	2	3	103	11.3604	11.356
B1ARA3	60S ribosomal protein L26 (Fragment) OS=Mus musculus GN=Rpl26 PE=1 SV=1 - [B1ARA3_MOUSE]	21.36	3	2	2	2	103	12.2096	10.9165
Q6P8I4	PEST proteolytic signal-containing nuclear protein OS=Mus musculus GN=Pcnp PE=1 SV=1 - [PCNP_MOUSE]	21.35	4	3	3	4	178	18.9514	7.48877
F6ZV59	Heterogeneous nuclear ribonucleoprotein D0 (Fragment) OS=Mus musculus GN=Hnrnpd PE=1 SV=1 - [F6ZV59_MOUSE]	21.3	7	4	5	13	216	24.7055	9.5249
P63323	40S ribosomal protein S12 OS=Mus musculus GN=Rps12 PE=1 SV=2 - [RS12_MOUSE]	21.21	2	2	2	6	132	14.5156	7.23975
F7BC60	Mitochondrial fission factor (Fragment) OS=Mus musculus GN=Mff PE=1 SV=1 - [F7BC60_MOUSE]	21.17	3	2	2	2	137	15.7112	9.36377
G3UXX3	Sepiapterin reductase OS=Mus musculus GN=Spr PE=1 SV=1 - [G3UXX3_MOUSE]	21	4	3	3	9	219	23.3421	6.21436
Q9WV69	Dematin OS=Mus musculus GN=Dmtn PE=1 SV=1 - [DEMA_MOUSE]	20.99	1	7	7	15	405	45.4402	8.41162
P19157	Glutathione S-transferase P 1 OS=Mus musculus GN=Gstp1 PE=1 SV=2 - [GSTP1_MOUSE]	20.95	2	3	3	4	210	23.5941	7.86963
P11798	Calcium/calmodulin-dependent protein kinase type II subunit alpha OS=Mus musculus GN=Camk2a PE=1 SV=2 - [KCC2A_MOUSE]	20.92	7	7	10	25	478	54.0805	7.07861
P48962	ADP/ATP translocase 1 OS=Mus musculus GN=Slc25a4 PE=1 SV=4 - [ADT1_MOUSE]	20.81	2	5	8	13	298	32.8831	9.71533
Q9QZ23	NFU1 iron-sulfur cluster scaffold homolog, mitochondrial OS=Mus musculus GN=Nfu1 PE=1 SV=2 - [NFU1_MOUSE]	20.78	3	3	3	3	255	28.5494	5.03369
A0A0U1RPY2	FXYD domain-containing ion transport regulator 7 OS=Mus musculus GN=Fxyd7 PE=1 SV=1 - [A0A0U1RPY2_MOUSE]	20.78	2	1	1	9	77	8.10907	7.84033
Q9Z204	Heterogeneous nuclear ribonucleoproteins C1/C2 OS=Mus musculus GN=Hnrnpc PE=1 SV=1 - [HNRPC_MOUSE]	20.77	1	5	5	7	313	34.3639	5.04639
P84104	Serine/arginine-rich splicing factor 3 OS=Mus musculus GN=Srsf3 PE=1 SV=1 - [SRSF3_MOUSE]	20.73	1	3	3	6	164	19.3179	11.6489
P62196	26S protease regulatory subunit 8 OS=Mus musculus GN=Psmc5 PE=1 SV=1 - [PRS8_MOUSE]	20.69	2	6	7	8	406	45.5971	7.54736
Q9CPP6	NADH dehydrogenase [ubiquinone] 1 alpha subcomplex subunit 5 OS=Mus musculus GN=Ndufa5 PE=1 SV=3 - [NDUA5_MOUSE]	20.69	1	3	3	5	116	13.3512	8.104
P60041	Somatostatin OS=Mus musculus GN=Sst PE=3 SV=1 - [SMS_MOUSE]	20.69	1	2	2	4	116	12.7374	5.51611
Q7TMF3	NADH dehydrogenase [ubiquinone] 1 alpha subcomplex subunit 12 OS=Mus musculus GN=Ndufa12 PE=1 SV=2 - [NDUAC_MOUSE]	20.69	2	2	2	3	145	17.0756	9.36377
H3BKL8	Dual-specificity protein phosphatase 3 OS=Mus musculus GN=Dusp3 PE=1 SV=1 - [H3BKL8_MOUSE]	20.69	3	2	2	3	145	16.0028	4.77979
Q3U4F0	Sideroflexin-3 OS=Mus musculus GN=Sfxn3 PE=1 SV=1 - [Q3U4F0_MOUSE]	20.64	2	3	4	14	281	30.932	8.98291
Q9QUH0	Glutaredoxin-1 OS=Mus musculus GN=Glrx PE=1 SV=3 - [GLRX1_MOUSE]	20.56	1	2	2	8	107	11.8631	8.36768
D3Z434	Synaptic vesicle membrane protein VAT-1 homolog-like (Fragment) OS=Mus musculus GN=Vat1l PE=1 SV=1 - [D3Z434_MOUSE]	20.47	2	2	2	3	127	13.92	4.93213
O54983	Ketimine reductase mu-crystallin OS=Mus musculus GN=Crym PE=1 SV=1 - [CRYM_MOUSE]	20.45	1	5	5	10	313	33.5021	5.66846
P51880	Fatty acid-binding protein, brain OS=Mus musculus GN=Fabp7 PE=1 SV=2 - [FABP7_MOUSE]	20.45	2	2	2	2	132	14.8834	5.63037
Q99LC5	Electron transfer flavoprotein subunit alpha, mitochondrial OS=Mus musculus GN=Etfa PE=1 SV=2 - [ETFA_MOUSE]	20.42	1	6	6	14	333	34.9875	8.38232
Q9CWS0	N(G),N(G)-dimethylarginine dimethylaminohydrolase 1 OS=Mus musculus GN=Ddah1 PE=1 SV=3 - [DDAH1_MOUSE]	20.35	2	5	5	12	285	31.3609	5.97314
P62774	Myotrophin OS=Mus musculus GN=Mtpn PE=1 SV=2 - [MTPN_MOUSE]	20.34	1	1	1	1	118	12.8526	5.51611
A0A0G2JDL9	MCG10748, isoform CRA_b OS=Mus musculus GN=Rap1a PE=1 SV=1 - [A0A0G2JDL9_MOUSE]	20.34	5	2	2	2	118	13.4171	9.21729
P68510	14-3-3 protein eta OS=Mus musculus GN=Ywhah PE=1 SV=2 - [1433F_MOUSE]	20.33	2	3	6	23	246	28.194	4.89404
H3BL05	Zinc finger protein 428 (Fragment) OS=Mus musculus GN=Zfp428 PE=1 SV=1 - [H3BL05_MOUSE]	20.26	3	2	2	2	153	16.3073	4.2085
A0A087WR97	TAR DNA-binding protein 43 (Fragment) OS=Mus musculus GN=Tardbp PE=1 SV=1 - [A0A087WR97_MOUSE]	20.16	12	5	5	10	243	26.6983	7.76709
Q99PT1	Rho GDP-dissociation inhibitor 1 OS=Mus musculus GN=Arhgdia PE=1 SV=3 - [GDIR1_MOUSE]	20.1	1	3	3	24	204	23.3928	5.19873
Q9JII6	Alcohol dehydrogenase [NADP(+)] OS=Mus musculus GN=Akr1a1 PE=1 SV=3 - [AK1A1_MOUSE]	20	2	5	6	16	325	36.5639	7.38623
P14231	Sodium/potassium-transporting ATPase subunit beta-2 OS=Mus musculus GN=Atp1b2 PE=1 SV=2 - [AT1B2_MOUSE]	20	2	4	4	14	290	33.3225	8.30908
Q9D1X0	Nucleolar protein 3 OS=Mus musculus GN=Nol3 PE=1 SV=1 - [NOL3_MOUSE]	20	1	3	3	3	220	24.5524	4.06885
F6V8R7	Replication protein A 32 kDa subunit (Fragment) OS=Mus musculus GN=Rpa2 PE=1 SV=1 - [F6V8R7_MOUSE]	20	3	1	1	1	70	7.5027	9.14404
P62911	60S ribosomal protein L32 OS=Mus musculus GN=Rpl32 PE=1 SV=2 - [RL32_MOUSE]	20	1	2	2	3	135	15.8498	11.3267
Q5EBJ4	Ermin OS=Mus musculus GN=Ermn PE=1 SV=1 - [ERMIN_MOUSE]	19.93	1	6	6	8	281	32.1284	4.58936
A0A140LI84	Protein phosphatase methylesterase 1 (Fragment) OS=Mus musculus GN=Ppme1 PE=1 SV=1 - [A0A140LI84_MOUSE]	19.78	2	3	3	3	182	19.3745	5.12256
A0A0G2JFK2	Far upstream element-binding protein 1 (Fragment) OS=Mus musculus GN=Fubp1 PE=1 SV=1 - [A0A0G2JFK2_MOUSE]	19.61	7	3	4	6	306	32.4252	6.26514
P67984	60S ribosomal protein L22 OS=Mus musculus GN=Rpl22 PE=1 SV=2 - [RL22_MOUSE]	19.53	1	2	2	2	128	14.7498	9.18799
Q9CPQ8	ATP synthase subunit g, mitochondrial OS=Mus musculus GN=Atp5l PE=1 SV=1 - [ATP5L_MOUSE]	19.42	1	1	1	5	103	11.4172	9.74463
B7ZCU2	Abl interactor 1 OS=Mus musculus GN=Abi1 PE=1 SV=1 - [B7ZCU2_MOUSE]	19.34	8	4	6	12	393	43.1477	6.55127
P08226	Apolipoprotein E OS=Mus musculus GN=Apoe PE=1 SV=2 - [APOE_MOUSE]	19.29	4	7	7	12	311	35.8444	5.68115
Q93092	Transaldolase OS=Mus musculus GN=Taldo1 PE=1 SV=2 - [TALDO_MOUSE]	19.29	2	6	6	11	337	37.3634	7.03467
P61922	4-aminobutyrate aminotransferase, mitochondrial OS=Mus musculus GN=Abat PE=1 SV=1 - [GABT_MOUSE]	19.2	4	6	6	22	500	56.4156	8.08936
Q64520	Guanylate kinase OS=Mus musculus GN=Guk1 PE=1 SV=2 - [KGUA_MOUSE]	19.19	3	2	2	3	198	21.9042	6.55127
Q6P069	Sorcin OS=Mus musculus GN=Sri PE=1 SV=1 - [SORCN_MOUSE]	19.19	1	2	2	2	198	21.6133	5.59229
E0CY91	Ubiquitin-like protein 5 OS=Mus musculus GN=Ubl5 PE=4 SV=1 - [E0CY91_MOUSE]	19.15	7	1	1	1	47	5.39697	9.80322
Q61753	D-3-phosphoglycerate dehydrogenase OS=Mus musculus GN=Phgdh PE=1 SV=3 - [SERA_MOUSE]	19.14	2	9	9	50	533	56.5491	6.53662
P70349	Histidine triad nucleotide-binding protein 1 OS=Mus musculus GN=Hint1 PE=1 SV=3 - [HINT1_MOUSE]	19.05	2	5	5	9	126	13.7681	6.87354
D3YVN7	Elongation factor Tu OS=Mus musculus GN=Gm9755 PE=3 SV=1 - [D3YVN7_MOUSE]	19.03	3	8	8	18	452	49.507	7.56201
E9PYA3	Hydroxyacylglutathione hydrolase, mitochondrial (Fragment) OS=Mus musculus GN=Hagh PE=1 SV=1 - [E9PYA3_MOUSE]	18.99	5	4	4	7	237	25.9832	8.44092
Q78WH7	Calcium/calmodulin-dependent protein kinase II inhibitor 2 OS=Mus musculus GN=Camk2n2 PE=1 SV=1 - [CK2N2_MOUSE]	18.99	1	1	1	1	79	8.62229	5.47803
Q561M1	Acp1 protein OS=Mus musculus GN=Acp1 PE=1 SV=1 - [Q561M1_MOUSE]	18.99	2	4	4	6	158	17.9108	6.53662
P06837	Neuromodulin OS=Mus musculus GN=Gap43 PE=1 SV=1 - [NEUM_MOUSE]	18.94	1	2	2	5	227	23.6183	4.729
A2AC13	RAS-related C3 botulinum substrate 3, isoform CRA_a (Fragment) OS=Mus musculus GN=Rac3 PE=1 SV=1 - [A2AC13_MOUSE]	18.92	3	1	4	6	185	20.7217	8.22119
Q9CQN3	Mitochondrial import receptor subunit TOM6 homolog OS=Mus musculus GN=Tomm6 PE=3 SV=1 - [TOM6_MOUSE]	18.92	1	1	1	3	74	7.85997	4.89404
Q91V12	Cytosolic acyl coenzyme A thioester hydrolase OS=Mus musculus GN=Acot7 PE=1 SV=2 - [BACH_MOUSE]	18.9	2	6	6	33	381	42.5097	8.67529
P19246	Neurofilament heavy polypeptide OS=Mus musculus GN=Nefh PE=1 SV=3 - [NFH_MOUSE]	18.9	9	19	23	92	1090	116.924	5.80811
P62204	Calmodulin OS=Mus musculus GN=Calm1 PE=1 SV=2 - [CALM_MOUSE]	18.79	3	2	2	47	149	16.8268	4.22119
Q9ERS2	NADH dehydrogenase [ubiquinone] 1 alpha subcomplex subunit 13 OS=Mus musculus GN=Ndufa13 PE=1 SV=3 - [NDUAD_MOUSE]	18.75	1	2	2	2	144	16.8486	9.48096
Q3UJQ9	Succinyl-CoA:3-ketoacid-coenzyme A transferase OS=Mus musculus GN=Oxct1 PE=1 SV=1 - [Q3UJQ9_MOUSE]	18.72	2	8	8	19	486	52.2451	8.93896
Q9Z2U1	Proteasome subunit alpha type-5 OS=Mus musculus GN=Psma5 PE=1 SV=1 - [PSA5_MOUSE]	18.67	3	4	4	11	241	26.3942	4.79248
Q9CR51	V-type proton ATPase subunit G 1 OS=Mus musculus GN=Atp6v1g1 PE=1 SV=3 - [VATG1_MOUSE]	18.64	1	2	2	2	118	13.716	7.97217
D6REV5	Ribosome maturation protein SBDS OS=Mus musculus GN=Sbds PE=1 SV=1 - [D6REV5_MOUSE]	18.6	2	1	1	1	43	4.90966	11.4878
P61082	NEDD8-conjugating enzyme Ubc12 OS=Mus musculus GN=Ube2m PE=1 SV=1 - [UBC12_MOUSE]	18.58	4	4	4	8	183	20.8866	7.69385
P60897	26S proteasome complex subunit DSS1 OS=Mus musculus GN=Shfm1 PE=3 SV=1 - [DSS1_MOUSE]	18.57	1	1	1	1	70	8.27256	3.96729
Q9JJI8	60S ribosomal protein L38 OS=Mus musculus GN=Rpl38 PE=1 SV=3 - [RL38_MOUSE]	18.57	1	1	1	1	70	8.19872	10.0962
Q3UGS4	Mapk-regulated corepressor-interacting protein 1 OS=Mus musculus GN=Mcrip1 PE=1 SV=1 - [MCRI1_MOUSE]	18.56	1	1	1	1	97	11.0946	9.14404
A0A0G2JGC9	Leucine-rich repeat-containing protein 40 (Fragment) OS=Mus musculus GN=Lrrc40 PE=1 SV=1 - [A0A0G2JGC9_MOUSE]	18.52	6	1	1	1	54	5.64477	9.27588
A2AGN7	26S protease regulatory subunit 6A OS=Mus musculus GN=Psmc3 PE=1 SV=1 - [A2AGN7_MOUSE]	18.5	4	5	5	10	400	44.6409	5.021
A0A0R4J2B0	CUGBP Elav-like family member 2 OS=Mus musculus GN=Celf2 PE=1 SV=1 - [A0A0R4J2B0_MOUSE]	18.41	11	6	7	13	440	46.5783	8.98291
Q9CQ69	Cytochrome b-c1 complex subunit 8 OS=Mus musculus GN=Uqcrq PE=1 SV=3 - [QCR8_MOUSE]	18.29	1	2	2	2	82	9.76211	10.2573
Q9CR61	NADH dehydrogenase [ubiquinone] 1 beta subcomplex subunit 7 OS=Mus musculus GN=Ndufb7 PE=1 SV=3 - [NDUB7_MOUSE]	18.25	1	2	2	28	137	16.3202	8.17725
Q921M7	Protein FAM49B OS=Mus musculus GN=Fam49b PE=1 SV=1 - [FA49B_MOUSE]	18.21	2	4	4	6	324	36.7527	6.06201
Q3UZP4	Small VCP/p97-interacting protein OS=Mus musculus GN=Svip PE=3 SV=1 - [SVIP_MOUSE]	18.18	1	1	1	1	77	8.35831	8.90967
P97300	Neuroplastin OS=Mus musculus GN=Nptn PE=1 SV=3 - [NPTN_MOUSE]	18.14	5	7	7	18	397	44.3454	7.73779
A0A0J9YUD8	High mobility group protein B1 OS=Mus musculus GN=Hmgb1 PE=1 SV=1 - [A0A0J9YUD8_MOUSE]	18.13	5	3	3	3	171	19.7611	9.71533
P51881	ADP/ATP translocase 2 OS=Mus musculus GN=Slc25a5 PE=1 SV=3 - [ADT2_MOUSE]	18.12	2	4	7	10	298	32.9102	9.72998
A2A860	WW domain binding protein 2, isoform CRA_a OS=Mus musculus GN=Wbp2 PE=1 SV=1 - [A2A860_MOUSE]	18.06	2	1	1	1	216	23.2933	6.31592
P63328	Serine/threonine-protein phosphatase 2B catalytic subunit alpha isoform OS=Mus musculus GN=Ppp3ca PE=1 SV=1 - [PP2BA_MOUSE]	18.04	4	4	8	13	521	58.6063	5.85889
A0A0U1RPX4	Mitogen-activated protein kinase (Fragment) OS=Mus musculus GN=Mapk3 PE=1 SV=1 - [A0A0U1RPX4_MOUSE]	17.91	18	3	4	14	335	38.0895	6.06201
P01831	Thy-1 membrane glycoprotein OS=Mus musculus GN=Thy1 PE=1 SV=1 - [THY1_MOUSE]	17.9	1	5	5	21	162	18.0685	8.96826
Q9QYS9	Protein quaking OS=Mus musculus GN=Qki PE=1 SV=1 - [QKI_MOUSE]	17.89	1	4	4	14	341	37.6467	8.55811
Q60864	Stress-induced-phosphoprotein 1 OS=Mus musculus GN=Stip1 PE=1 SV=1 - [STIP1_MOUSE]	17.86	1	9	9	29	543	62.5424	6.80029
Q62433	Protein NDRG1 OS=Mus musculus GN=Ndrg1 PE=1 SV=1 - [NDRG1_MOUSE]	17.77	6	6	6	10	394	42.9809	6.1001
P63054	Purkinje cell protein 4 OS=Mus musculus GN=Pcp4 PE=3 SV=2 - [PCP4_MOUSE]	17.74	2	2	2	30	62	6.80329	6.7124
Q9D967	Magnesium-dependent phosphatase 1 OS=Mus musculus GN=Mdp1 PE=1 SV=1 - [MGDP1_MOUSE]	17.68	1	2	2	3	164	18.5706	6.80029
P62754	40S ribosomal protein S6 OS=Mus musculus GN=Rps6 PE=1 SV=1 - [RS6_MOUSE]	17.67	1	3	3	3	249	28.663	10.8433
E0CZ27	Histone H3 (Fragment) OS=Mus musculus GN=H3f3a PE=3 SV=1 - [E0CZ27_MOUSE]	17.65	6	3	3	5	119	13.3144	11.019
A2AL12	Heterogeneous nuclear ribonucleoprotein A3 OS=Mus musculus GN=Hnrnpa3 PE=1 SV=1 - [A2AL12_MOUSE]	17.61	6	5	5	28	318	34.4545	9.1001
A2AIM4	Tropomyosin beta chain OS=Mus musculus GN=Tpm2 PE=1 SV=1 - [A2AIM4_MOUSE]	17.61	4	1	4	6	284	32.9736	4.69092
P48428	Tubulin-specific chaperone A OS=Mus musculus GN=Tbca PE=1 SV=3 - [TBCA_MOUSE]	17.59	1	2	2	9	108	12.7496	5.2749
P31324	cAMP-dependent protein kinase type II-beta regulatory subunit OS=Mus musculus GN=Prkar2b PE=1 SV=3 - [KAP3_MOUSE]	17.55	2	5	5	5	416	46.138	4.98291
Q3UHH0	Calcium-transporting ATPase OS=Mus musculus GN=Atp2b2 PE=1 SV=1 - [Q3UHH0_MOUSE]	17.5	4	9	17	44	1194	132.022	5.96045
E0CXR4	Membrane-associated phosphatidylinositol transfer protein 2 (Fragment) OS=Mus musculus GN=Pitpnm2 PE=1 SV=1 - [E0CXR4_MOUSE]	17.5	5	1	1	1	40	4.69243	9.31982
Q9QUM9	Proteasome subunit alpha type-6 OS=Mus musculus GN=Psma6 PE=1 SV=1 - [PSA6_MOUSE]	17.48	3	4	4	7	246	27.3548	6.75635
Q6IRU5	Clathrin light chain B OS=Mus musculus GN=Cltb PE=1 SV=1 - [CLCB_MOUSE]	17.47	2	4	4	11	229	25.1562	4.62744
A0A0N4SVD2	Zyxin (Fragment) OS=Mus musculus GN=Zyx PE=1 SV=1 - [A0A0N4SVD2_MOUSE]	17.43	5	1	1	2	109	11.1567	4.84326
A2A8E2	Protein 0610037L13Rik OS=Mus musculus GN=0610037L13Rik PE=1 SV=1 - [A2A8E2_MOUSE]	17.39	4	2	2	2	138	15.7728	5.64307
P46460	Vesicle-fusing ATPase OS=Mus musculus GN=Nsf PE=1 SV=2 - [NSF_MOUSE]	17.34	3	12	12	61	744	82.561	6.94678
A0A087WPK2	Immunoglobulin-like and fibronectin type III domain-containing protein 1 (Fragment) OS=Mus musculus GN=Igfn1 PE=4 SV=1 - [A0A087WPK2_MOUSE]	17.31	3	1	1	1	208	22.5231	6.20166
A6ZI47	Fructose-bisphosphate aldolase OS=Mus musculus GN=Aldoart2 PE=1 SV=1 - [A6ZI47_MOUSE]	17.31	1	2	9	69	364	39.3461	7.44482
Q9D0S9	Histidine triad nucleotide-binding protein 2, mitochondrial OS=Mus musculus GN=Hint2 PE=1 SV=1 - [HINT2_MOUSE]	17.18	1	2	2	3	163	17.3094	9.81787
A0A087WRY3	Nuclear ubiquitous casein and cyclin-dependent kinase substrate 1 OS=Mus musculus GN=Nucks1 PE=1 SV=1 - [A0A087WRY3_MOUSE]	17.17	2	2	2	3	233	26.1685	5.12256
Q61166	Microtubule-associated protein RP/EB family member 1 OS=Mus musculus GN=Mapre1 PE=1 SV=3 - [MARE1_MOUSE]	17.16	1	3	3	9	268	29.9972	5.22412
Q62419	Endophilin-A2 OS=Mus musculus GN=Sh3gl1 PE=1 SV=1 - [SH3G1_MOUSE]	17.12	1	3	5	59	368	41.4922	5.71924
Q9QUI0	Transforming protein RhoA OS=Mus musculus GN=Rhoa PE=1 SV=1 - [RHOA_MOUSE]	17.1	7	3	3	4	193	21.7681	6.1001
Q64332	Synapsin-2 OS=Mus musculus GN=Syn2 PE=1 SV=2 - [SYN2_MOUSE]	17.06	1	8	9	49	586	63.3327	8.42627
Q9CPZ8	COX assembly mitochondrial protein homolog OS=Mus musculus GN=Cmc1 PE=1 SV=1 - [COXM1_MOUSE]	16.98	1	2	2	2	106	12.5444	8.23584
F7B227	Delta(3,5)-Delta(2,4)-dienoyl-CoA isomerase, mitochondrial (Fragment) OS=Mus musculus GN=Ech1 PE=1 SV=1 - [F7B227_MOUSE]	16.95	2	2	2	2	177	19.3067	5.66846
D3YYH8	Protein Prdm15 (Fragment) OS=Mus musculus GN=Prdm15 PE=1 SV=1 - [D3YYH8_MOUSE]	16.95	5	1	1	1	59	6.69006	4.34814
P47708	Rabphilin-3A OS=Mus musculus GN=Rph3a PE=1 SV=2 - [RP3A_MOUSE]	16.89	1	7	7	8	681	75.4417	8.26514
S4R1N6	40S ribosomal protein S18 OS=Mus musculus GN=Rps18 PE=3 SV=1 - [S4R1N6_MOUSE]	16.82	4	2	2	2	107	12.4757	10.1255
A0A0A0MQM0	Eukaryotic translation initiation factor 5A (Fragment) OS=Mus musculus GN=Eif5a PE=1 SV=1 - [A0A0A0MQM0_MOUSE]	16.78	3	2	2	2	149	16.2921	4.99561
Q9WUM5	Succinate--CoA ligase [ADP/GDP-forming] subunit alpha, mitochondrial OS=Mus musculus GN=Suclg1 PE=1 SV=4 - [SUCA_MOUSE]	16.76	1	3	3	29	346	36.132	9.39307
P50516	V-type proton ATPase catalytic subunit A OS=Mus musculus GN=Atp6v1a PE=1 SV=2 - [VATA_MOUSE]	16.69	3	8	8	90	617	68.2826	5.57959
P49722	Proteasome subunit alpha type-2 OS=Mus musculus GN=Psma2 PE=1 SV=3 - [PSA2_MOUSE]	16.67	1	2	2	3	234	25.9103	7.43018
A0A087WPV5	Thiamine-triphosphatase OS=Mus musculus GN=Thtpa PE=1 SV=1 - [A0A087WPV5_MOUSE]	16.67	3	1	1	1	48	5.1646	4.81787
P62627	Dynein light chain roadblock-type 1 OS=Mus musculus GN=Dynlrb1 PE=1 SV=3 - [DLRB1_MOUSE]	16.67	2	2	2	37	96	10.9828	7.25439
A0A0U1RPU7	Flavin reductase (NADPH) OS=Mus musculus GN=Blvrb PE=1 SV=1 - [A0A0U1RPU7_MOUSE]	16.67	3	1	1	1	126	12.8606	7.44482
P08113	Endoplasmin OS=Mus musculus GN=Hsp90b1 PE=1 SV=2 - [ENPL_MOUSE]	16.58	3	11	12	35	802	92.4183	4.81787
P56873	Sjoegren syndrome/scleroderma autoantigen 1 homolog OS=Mus musculus GN=Sssca1 PE=1 SV=1 - [SSA27_MOUSE]	16.58	1	2	2	3	199	21.3226	5.12256
P11031	Activated RNA polymerase II transcriptional coactivator p15 OS=Mus musculus GN=Sub1 PE=1 SV=3 - [TCP4_MOUSE]	16.54	1	2	2	2	127	14.4184	9.59814
A0A140LJL0	CD81 antigen (Fragment) OS=Mus musculus GN=Cd81 PE=1 SV=1 - [A0A140LJL0_MOUSE]	16.53	2	1	1	1	121	13.1674	4.99561
P10649	Glutathione S-transferase Mu 1 OS=Mus musculus GN=Gstm1 PE=1 SV=2 - [GSTM1_MOUSE]	16.51	16	4	4	7	218	25.9531	7.94287
E9Q1G8	Septin-7 OS=Mus musculus GN=Sept7 PE=1 SV=2 - [E9Q1G8_MOUSE]	16.48	3	5	5	6	437	50.617	8.57275
G3UVV4	Hexokinase 1, isoform CRA_f OS=Mus musculus GN=Hk1 PE=1 SV=1 - [G3UVV4_MOUSE]	16.47	5	12	12	19	917	101.808	6.66846
G3UWK0	Selenium-binding protein 2 (Fragment) OS=Mus musculus GN=Selenbp2 PE=4 SV=1 - [G3UWK0_MOUSE]	16.41	6	2	2	2	128	14.205	7.06396
G5E884	Serine/threonine-protein kinase PAK 1 OS=Mus musculus GN=Pak1 PE=1 SV=1 - [G5E884_MOUSE]	16.36	2	2	4	28	544	60.5697	5.85889
P84089	Enhancer of rudimentary homolog OS=Mus musculus GN=Erh PE=1 SV=1 - [ERH_MOUSE]	16.35	2	1	1	16	104	12.251	5.92236
Q8BK30	NADH dehydrogenase [ubiquinone] flavoprotein 3, mitochondrial OS=Mus musculus GN=Ndufv3 PE=1 SV=1 - [NDUV3_MOUSE]	16.35	1	1	1	1	104	11.8063	9.34912
Q9CQ60	6-phosphogluconolactonase OS=Mus musculus GN=Pgls PE=1 SV=1 - [6PGL_MOUSE]	16.34	4	3	3	23	257	27.2374	5.84619
A2A5E1	DnaJ homolog subfamily C member 7 (Fragment) OS=Mus musculus GN=Dnajc7 PE=1 SV=1 - [A2A5E1_MOUSE]	16.33	3	2	2	2	147	17.1663	8.85107
P61264	Syntaxin-1B OS=Mus musculus GN=Stx1b PE=1 SV=1 - [STX1B_MOUSE]	16.32	6	4	5	11	288	33.2238	5.37646
Q61990	Poly(rC)-binding protein 2 OS=Mus musculus GN=Pcbp2 PE=1 SV=1 - [PCBP2_MOUSE]	16.3	3	1	5	35	362	38.1974	6.78564
G3X915	LysM and putative peptidoglycan-binding domain-containing protein 2 OS=Mus musculus GN=Lysmd2 PE=1 SV=1 - [G3X915_MOUSE]	16.28	2	2	2	2	215	23.5801	5.51611
P10126	Elongation factor 1-alpha 1 OS=Mus musculus GN=Eef1a1 PE=1 SV=3 - [EF1A1_MOUSE]	16.23	1	2	4	8	462	50.0821	9.01221
P43024	Cytochrome c oxidase subunit 6A1, mitochondrial OS=Mus musculus GN=Cox6a1 PE=1 SV=2 - [CX6A1_MOUSE]	16.22	2	1	1	1	111	12.3443	9.979
Q8BJU0	Small glutamine-rich tetratricopeptide repeat-containing protein alpha OS=Mus musculus GN=Sgta PE=1 SV=2 - [SGTA_MOUSE]	16.19	1	4	4	9	315	34.3009	5.05908
Q7TSJ2	Microtubule-associated protein 6 OS=Mus musculus GN=Map6 PE=1 SV=2 - [MAP6_MOUSE]	16.11	3	10	10	100	906	96.3906	9.49561
A0A4W9	Neuronal growth regulator 1 OS=Mus musculus GN=Negr1 PE=1 SV=1 - [A0A4W9_MOUSE]	16.11	3	4	4	7	329	36.0952	6.85889
P21619	Lamin-B2 OS=Mus musculus GN=Lmnb2 PE=1 SV=2 - [LMNB2_MOUSE]	16.11	2	5	6	7	596	67.2773	5.50342
D3Z103	N-terminal EF-hand calcium-binding protein 2 (Fragment) OS=Mus musculus GN=Necab2 PE=1 SV=1 - [D3Z103_MOUSE]	16.07	2	3	3	3	224	25.1724	5.05908
D3YZZ4	TSC22 domain family protein 4 OS=Mus musculus GN=Tsc22d4 PE=1 SV=1 - [D3YZZ4_MOUSE]	16.07	3	2	2	3	168	17.567	8.51416
P70441	Na(+)/H(+) exchange regulatory cofactor NHE-RF1 OS=Mus musculus GN=Slc9a3r1 PE=1 SV=3 - [NHRF1_MOUSE]	16.06	1	4	4	10	355	38.5765	5.89697
Q8CC35	Synaptopodin OS=Mus musculus GN=Synpo PE=1 SV=2 - [SYNPO_MOUSE]	16.04	2	7	7	11	929	99.4904	9.42236
A0A0G2JFG5	Calcium/calmodulin-dependent protein kinase kinase 2 (Fragment) OS=Mus musculus GN=Camkk2 PE=1 SV=4 - [A0A0G2JFG5_MOUSE]	15.97	3	1	1	1	119	13.0055	9.5249
Q9WUL7	ADP-ribosylation factor-like protein 3 OS=Mus musculus GN=Arl3 PE=1 SV=1 - [ARL3_MOUSE]	15.93	1	2	2	2	182	20.4738	7.23975
A0A087WR90	Abl interactor 2 (Fragment) OS=Mus musculus GN=Abi2 PE=1 SV=6 - [A0A087WR90_MOUSE]	15.89	7	1	3	6	151	17.2361	9.77393
F8WHP8	ATP synthase subunit f, mitochondrial OS=Mus musculus GN=Atp5j2 PE=1 SV=1 - [F8WHP8_MOUSE]	15.79	2	1	1	2	76	8.99962	9.87646
A0A140LIZ5	26S protease regulatory subunit 6B OS=Mus musculus GN=Psmc4 PE=1 SV=1 - [A0A140LIZ5_MOUSE]	15.76	2	4	5	7	387	43.5226	5.26221
P60824	Cold-inducible RNA-binding protein OS=Mus musculus GN=Cirbp PE=1 SV=1 - [CIRBP_MOUSE]	15.7	2	2	2	4	172	18.5958	9.61279
H7BX22	Ran-specific GTPase-activating protein OS=Mus musculus GN=Ranbp1 PE=1 SV=1 - [H7BX22_MOUSE]	15.69	2	2	2	4	153	17.8762	8.23584
Q9D0E1	Heterogeneous nuclear ribonucleoprotein M OS=Mus musculus GN=Hnrnpm PE=1 SV=3 - [HNRPM_MOUSE]	15.64	5	10	10	18	729	77.5974	8.63135
A2BI12	PC4 and SFRS1-interacting protein OS=Mus musculus GN=Psip1 PE=1 SV=1 - [A2BI12_MOUSE]	15.6	3	3	3	3	327	36.9459	9.23193
O70251	Elongation factor 1-beta OS=Mus musculus GN=Eef1b PE=1 SV=5 - [EF1B_MOUSE]	15.56	2	3	3	16	225	24.6782	4.69092
P63276	40S ribosomal protein S17 OS=Mus musculus GN=Rps17 PE=1 SV=2 - [RS17_MOUSE]	15.56	1	2	2	2	135	15.5144	9.84717
D3Z2F7	Actin-related protein 2/3 complex subunit 3 OS=Mus musculus GN=Arpc3 PE=1 SV=1 - [D3Z2F7_MOUSE]	15.53	5	2	2	2	161	18.6704	8.79248
Q3U0V1	Far upstream element-binding protein 2 OS=Mus musculus GN=Khsrp PE=1 SV=2 - [FUBP2_MOUSE]	15.51	1	7	8	22	748	76.7277	7.32764
A0A0N4SVE1	V-type proton ATPase subunit F OS=Mus musculus GN=Atp6v1f PE=1 SV=1 - [A0A0N4SVE1_MOUSE]	15.49	3	2	2	12	71	8.15627	6.78564
Q8R071	Inositol-trisphosphate 3-kinase A OS=Mus musculus GN=Itpka PE=1 SV=1 - [IP3KA_MOUSE]	15.47	2	4	4	4	459	50.9029	7.72314
Q9CZC8	Secernin-1 OS=Mus musculus GN=Scrn1 PE=1 SV=1 - [SCRN1_MOUSE]	15.46	3	7	7	9	414	46.2966	4.79248
A0A140T8K8	60S ribosomal protein L13 OS=Mus musculus GN=Rpl13-ps3 PE=3 SV=1 - [A0A140T8K8_MOUSE]	15.46	2	4	4	8	207	23.9933	11.4878
A0A0G2JEX7	40S ribosomal protein S27 OS=Mus musculus GN=Rps27 PE=3 SV=1 - [A0A0G2JEX7_MOUSE]	15.38	4	1	1	3	52	5.64277	8.76318
D6RGA5	Pre-mRNA-splicing factor SPF27 OS=Mus musculus GN=Bcas2 PE=1 SV=1 - [D6RGA5_MOUSE]	15.38	2	1	1	1	78	8.64319	4.65283
Q3UZI5	Pleiotrophin OS=Mus musculus GN=Ptn PE=1 SV=1 - [Q3UZI5_MOUSE]	15.38	2	1	1	1	156	17.4028	9.56885
Q9WTX5	S-phase kinase-associated protein 1 OS=Mus musculus GN=Skp1 PE=1 SV=3 - [SKP1_MOUSE]	15.34	2	2	2	3	163	18.6603	4.53857
Q9DCC4	Pyrroline-5-carboxylate reductase 3 OS=Mus musculus GN=Pycrl PE=1 SV=2 - [P5CR3_MOUSE]	15.33	1	3	3	3	274	28.7027	7.26904
F7CXG9	39S ribosomal protein L13, mitochondrial (Fragment) OS=Mus musculus GN=Mrpl13 PE=1 SV=1 - [F7CXG9_MOUSE]	15.31	2	1	1	1	98	11.5111	9.08545
A0A140T8J4	Heme binding protein 1 OS=Mus musculus GN=Hebp1 PE=1 SV=1 - [A0A140T8J4_MOUSE]	15.26	2	1	1	1	190	21.0393	5.26221
A0A0G2JEA9	RNA-binding protein 8A OS=Mus musculus GN=Rbm8a PE=1 SV=1 - [A0A0G2JEA9_MOUSE]	15.2	4	1	1	2	125	14.4931	5.94775
F6W8Q2	Ras-related protein Rap-2a (Fragment) OS=Mus musculus GN=Rap2a PE=1 SV=1 - [F6W8Q2_MOUSE]	15.19	2	1	1	1	79	8.82009	4.4751
Q9Z1G3	V-type proton ATPase subunit C 1 OS=Mus musculus GN=Atp6v1c1 PE=1 SV=4 - [VATC1_MOUSE]	15.18	1	6	6	7	382	43.8599	7.45947
Q8BKZ9	Pyruvate dehydrogenase protein X component, mitochondrial OS=Mus musculus GN=Pdhx PE=1 SV=1 - [ODPX_MOUSE]	15.17	3	6	6	10	501	53.9652	7.75244
Q8K354	Carbonyl reductase [NADPH] 3 OS=Mus musculus GN=Cbr3 PE=1 SV=1 - [CBR3_MOUSE]	15.16	1	3	4	7	277	30.9339	6.56592
O55125	Protein NipSnap homolog 1 OS=Mus musculus GN=Nipsnap1 PE=1 SV=1 - [NIPS1_MOUSE]	15.14	1	5	5	10	284	33.342	9.43701
O08539	Myc box-dependent-interacting protein 1 OS=Mus musculus GN=Bin1 PE=1 SV=1 - [BIN1_MOUSE]	15.14	6	6	8	37	588	64.4302	5.03369
Q91VA7	Isocitrate dehydrogenase [NAD] subunit, mitochondrial OS=Mus musculus GN=Idh3b PE=1 SV=1 - [Q91VA7_MOUSE]	15.1	2	6	6	23	384	42.1677	8.60205
Q99K48	Non-POU domain-containing octamer-binding protein OS=Mus musculus GN=Nono PE=1 SV=3 - [NONO_MOUSE]	15.01	1	5	5	5	473	54.5064	8.95361
P62823	Ras-related protein Rab-3C OS=Mus musculus GN=Rab3c PE=1 SV=1 - [RAB3C_MOUSE]	14.98	39	1	2	4	227	25.8556	5.23682
P03930	ATP synthase protein 8 OS=Mus musculus GN=Mtatp8 PE=1 SV=1 - [ATP8_MOUSE]	14.93	1	1	1	5	67	7.76119	9.87646
F7BX26	Serine/threonine-protein phosphatase (Fragment) OS=Mus musculus GN=Ppp5c PE=1 SV=1 - [F7BX26_MOUSE]	14.92	2	5	5	7	476	54.2807	6.20166
Q9JIX0	Transcription and mRNA export factor ENY2 OS=Mus musculus GN=Eny2 PE=1 SV=1 - [ENY2_MOUSE]	14.85	1	1	1	1	101	11.5213	9.33447
F6SBE4	PHD finger protein 24 (Fragment) OS=Mus musculus GN=Phf24 PE=1 SV=1 - [F6SBE4_MOUSE]	14.84	3	2	2	3	256	29.0813	5.68115
Q8BH95	Enoyl-CoA hydratase, mitochondrial OS=Mus musculus GN=Echs1 PE=1 SV=1 - [ECHM_MOUSE]	14.83	1	4	4	11	290	31.4542	8.48486
Q9DD18	D-tyrosyl-tRNA(Tyr) deacylase 1 OS=Mus musculus GN=Dtd1 PE=1 SV=2 - [DTD1_MOUSE]	14.83	1	2	2	18	209	23.3698	7.86963
P43276	Histone H1.5 OS=Mus musculus GN=Hist1h1b PE=1 SV=2 - [H15_MOUSE]	14.8	1	1	3	5	223	22.5624	10.9165
Q3TYE5	Limbic system-associated membrane protein OS=Mus musculus GN=Lsamp PE=1 SV=1 - [Q3TYE5_MOUSE]	14.79	4	4	4	5	338	37.2871	6.68311
A0A0R3P9C8	NADH dehydrogenase [ubiquinone] 1 alpha subcomplex subunit 9, mitochondrial OS=Mus musculus GN=Ndufa9 PE=1 SV=1 - [A0A0R3P9C8_MOUSE]	14.75	2	4	4	7	373	42.0948	9.08545
Q9CQF7	Prefoldin 1 OS=Mus musculus GN=Pfdn1 PE=1 SV=1 - [Q9CQF7_MOUSE]	14.75	2	2	2	11	122	14.2465	6.81494
Q923T9	Calcium/calmodulin-dependent protein kinase type II subunit gamma OS=Mus musculus GN=Camk2g PE=1 SV=1 - [KCC2G_MOUSE]	14.74	18	4	7	13	529	59.5693	7.57666
P09813	Apolipoprotein A-II OS=Mus musculus GN=Apoa2 PE=1 SV=2 - [APOA2_MOUSE]	14.71	1	1	1	2	102	11.3017	7.18115
Q7M750	Opalin OS=Mus musculus GN=Opalin PE=1 SV=1 - [OPALI_MOUSE]	14.69	1	1	1	1	143	15.8231	4.88135
E9Q6P1	Phosphoserine aminotransferase (Fragment) OS=Mus musculus GN=Psat1 PE=1 SV=1 - [E9Q6P1_MOUSE]	14.65	3	2	2	5	157	16.8216	7.37158
Q61553	Fascin OS=Mus musculus GN=Fscn1 PE=1 SV=4 - [FSCN1_MOUSE]	14.6	2	6	6	12	493	54.4739	6.88818
Q9Z1S5	Neuronal-specific septin-3 OS=Mus musculus GN=Sept3 PE=1 SV=2 - [SEPT3_MOUSE]	14.57	1	6	6	7	350	40.0126	6.81494
P63325	40S ribosomal protein S10 OS=Mus musculus GN=Rps10 PE=1 SV=1 - [RS10_MOUSE]	14.55	1	1	1	1	165	18.9038	10.1548
P50396	Rab GDP dissociation inhibitor alpha OS=Mus musculus GN=Gdi1 PE=1 SV=3 - [GDIA_MOUSE]	14.54	3	6	8	70	447	50.4891	5.08447
O70435	Proteasome subunit alpha type-3 OS=Mus musculus GN=Psma3 PE=1 SV=3 - [PSA3_MOUSE]	14.51	4	3	3	6	255	28.3871	5.43994
Q9D115	Zinc finger protein 706 OS=Mus musculus GN=Znf706 PE=1 SV=1 - [ZN706_MOUSE]	14.47	1	1	1	1	76	8.49245	10.0083
Q00623	Apolipoprotein A-I OS=Mus musculus GN=Apoa1 PE=1 SV=2 - [APOA1_MOUSE]	14.39	1	4	4	10	264	30.5966	5.73193
Q9WUM4	Coronin-1C OS=Mus musculus GN=Coro1c PE=1 SV=2 - [COR1C_MOUSE]	14.35	3	6	6	10	474	53.087	7.07861
E9QMK3	Versican core protein OS=Mus musculus GN=Vcan PE=1 SV=1 - [E9QMK3_MOUSE]	14.35	7	7	7	28	655	74.2703	6.91748
P62274	40S ribosomal protein S29 OS=Mus musculus GN=Rps29 PE=3 SV=2 - [RS29_MOUSE]	14.29	2	1	1	2	56	6.6723	10.1255
H3BK66	WD repeat-containing protein 37 (Fragment) OS=Mus musculus GN=Wdr37 PE=1 SV=1 - [H3BK66_MOUSE]	14.29	5	1	1	1	133	14.8817	9.30518
A0A0J9YUM4	C-terminal-binding protein 1 OS=Mus musculus GN=Ctbp1 PE=1 SV=1 - [A0A0J9YUM4_MOUSE]	14.24	7	5	5	9	337	36.9831	6.7417
Q9EQ20	Methylmalonate-semialdehyde dehydrogenase [acylating], mitochondrial OS=Mus musculus GN=Aldh6a1 PE=1 SV=1 - [MMSA_MOUSE]	14.21	1	6	6	15	535	57.8785	8.07471
P08905	Lysozyme C-2 OS=Mus musculus GN=Lyz2 PE=1 SV=2 - [LYZ2_MOUSE]	14.19	1	1	1	1	148	16.6782	8.80713
O35381	Acidic leucine-rich nuclear phosphoprotein 32 family member A OS=Mus musculus GN=Anp32a PE=1 SV=1 - [AN32A_MOUSE]	14.17	5	2	3	4	247	28.5202	4.06885
D3YWY6	Mitochondrial pyruvate carrier OS=Mus musculus GN=Mpc1 PE=1 SV=1 - [D3YWY6_MOUSE]	14.12	4	1	1	1	85	9.7319	9.39307
P48036	Annexin A5 OS=Mus musculus GN=Anxa5 PE=1 SV=1 - [ANXA5_MOUSE]	14.11	2	4	4	4	319	35.7302	4.95752
Q9JKC6	Cell cycle exit and neuronal differentiation protein 1 OS=Mus musculus GN=Cend1 PE=1 SV=1 - [CEND_MOUSE]	14.09	1	1	1	1	149	14.9778	8.96826
P60202	Myelin proteolipid protein OS=Mus musculus GN=Plp1 PE=1 SV=2 - [MYPR_MOUSE]	14.08	1	4	4	20	277	30.0571	8.35303
Q9WUM3	Coronin-1B OS=Mus musculus GN=Coro1b PE=1 SV=1 - [COR1B_MOUSE]	14.05	2	3	3	3	484	53.878	5.78271
E9Q3T0	Protein Gm10073 OS=Mus musculus GN=Gm10073 PE=1 SV=1 - [E9Q3T0_MOUSE]	14.04	2	1	1	2	114	11.4257	4.36084
Q5M8N0	CB1 cannabinoid receptor-interacting protein 1 OS=Mus musculus GN=Cnrip1 PE=1 SV=1 - [CNRP1_MOUSE]	14.02	2	2	2	4	164	18.6006	7.95752
B1AZ46	Brain-specific angiogenesis inhibitor 1-associated protein 2 OS=Mus musculus GN=Baiap2 PE=1 SV=1 - [B1AZ46_MOUSE]	14.01	2	4	4	4	521	57.6461	8.79248
G3UXK7	Cytochrome c-type heme lyase OS=Mus musculus GN=Hccs PE=1 SV=1 - [G3UXK7_MOUSE]	13.98	2	1	1	1	93	9.54651	6.26514
Q9D8N0	Elongation factor 1-gamma OS=Mus musculus GN=Eef1g PE=1 SV=3 - [EF1G_MOUSE]	13.96	1	4	4	7	437	50.0292	6.7417
Q61036	Serine/threonine-protein kinase PAK 3 OS=Mus musculus GN=Pak3 PE=1 SV=2 - [PAK3_MOUSE]	13.95	5	2	4	17	559	62.3585	5.40186
H3BLI9	TSC22 domain family protein 1 OS=Mus musculus GN=Tsc22d1 PE=1 SV=1 - [H3BLI9_MOUSE]	13.95	5	1	1	1	86	9.35275	4.77979
H3BLR8	Diphosphoinositol polyphosphate phosphohydrolase 1 OS=Mus musculus GN=Nudt3 PE=1 SV=1 - [H3BLR8_MOUSE]	13.93	5	1	2	3	122	13.5997	4.93213
F7DE82	SRA stem-loop-interacting RNA-binding protein, mitochondrial (Fragment) OS=Mus musculus GN=Slirp PE=1 SV=1 - [F7DE82_MOUSE]	13.92	3	1	1	1	79	9.18384	11.5024
A0A0U1RNU6	B-cell CLL/lymphoma 7 protein family member C OS=Mus musculus GN=Bcl7c PE=1 SV=1 - [A0A0U1RNU6_MOUSE]	13.89	8	1	1	1	72	8.32644	10.2573
Q8VIJ6	Splicing factor, proline- and glutamine-rich OS=Mus musculus GN=Sfpq PE=1 SV=1 - [SFPQ_MOUSE]	13.88	1	8	8	19	699	75.3943	9.43701
Q9D0J8	Parathymosin OS=Mus musculus GN=Ptms PE=1 SV=3 - [PTMS_MOUSE]	13.86	1	2	2	3	101	11.4231	4.22119
Q9D0R8	Protein LSM12 homolog OS=Mus musculus GN=Lsm12 PE=1 SV=1 - [LSM12_MOUSE]	13.85	2	2	2	8	195	21.6871	7.73779
Q62048	Astrocytic phosphoprotein PEA-15 OS=Mus musculus GN=Pea15 PE=1 SV=1 - [PEA15_MOUSE]	13.85	1	2	2	2	130	15.0448	5.021
P14094	Sodium/potassium-transporting ATPase subunit beta-1 OS=Mus musculus GN=Atp1b1 PE=1 SV=1 - [AT1B1_MOUSE]	13.82	2	4	4	4	304	35.172	8.646
P56379	6.8 kDa mitochondrial proteolipid OS=Mus musculus GN=Mp68 PE=1 SV=1 - [68MP_MOUSE]	13.79	1	1	1	1	58	6.69359	9.99365
G3UWL7	Histone H2A OS=Mus musculus GN=H2afz PE=1 SV=1 - [G3UWL7_MOUSE]	13.79	4	1	2	7	87	9.11288	10.7847
P62311	U6 snRNA-associated Sm-like protein LSm3 OS=Mus musculus GN=Lsm3 PE=1 SV=2 - [LSM3_MOUSE]	13.73	1	1	1	2	102	11.838	4.70361
P47738	Aldehyde dehydrogenase, mitochondrial OS=Mus musculus GN=Aldh2 PE=1 SV=1 - [ALDH2_MOUSE]	13.68	5	6	6	14	519	56.5018	7.62061
A0A0G2JGK3	Myocyte-specific enhancer factor 2C (Fragment) OS=Mus musculus GN=Mef2c PE=1 SV=1 - [A0A0G2JGK3_MOUSE]	13.66	11	2	2	15	161	18.4382	6.771
O70492	Sorting nexin-3 OS=Mus musculus GN=Snx3 PE=1 SV=3 - [SNX3_MOUSE]	13.58	8	3	3	4	162	18.7457	8.66064
Q00PI9	Heterogeneous nuclear ribonucleoprotein U-like protein 2 OS=Mus musculus GN=Hnrnpul2 PE=1 SV=2 - [HNRL2_MOUSE]	13.56	1	8	8	16	745	84.8878	4.89404
Q8BMF4	Dihydrolipoyllysine-residue acetyltransferase component of pyruvate dehydrogenase complex, mitochondrial OS=Mus musculus GN=Dlat PE=1 SV=2 - [ODP2_MOUSE]	13.55	1	10	10	29	642	67.8987	8.57275
Q64521	Glycerol-3-phosphate dehydrogenase, mitochondrial OS=Mus musculus GN=Gpd2 PE=1 SV=2 - [GPDM_MOUSE]	13.48	2	10	10	20	727	80.9025	6.60986
O08795	Glucosidase 2 subunit beta OS=Mus musculus GN=Prkcsh PE=1 SV=1 - [GLU2B_MOUSE]	13.44	1	6	6	9	521	58.7558	4.4624
P62631	Elongation factor 1-alpha 2 OS=Mus musculus GN=Eef1a2 PE=1 SV=1 - [EF1A2_MOUSE]	13.39	1	3	5	7	463	50.4223	9.02686
D3Z3A0	MCG126099, isoform CRA_b OS=Mus musculus GN=Ppp1r2 PE=1 SV=1 - [D3Z3A0_MOUSE]	13.33	2	4	4	6	195	21.9055	4.729
A0A140LIM7	Pleckstrin homology-like domain family A member 2 (Fragment) OS=Mus musculus GN=Phlda2 PE=1 SV=1 - [A0A140LIM7_MOUSE]	13.33	2	1	1	1	105	12.1652	8.55811
P62746	Rho-related GTP-binding protein RhoB OS=Mus musculus GN=Rhob PE=1 SV=1 - [RHOB_MOUSE]	13.27	1	3	3	8	196	22.1091	5.23682
P61759	Prefoldin subunit 3 OS=Mus musculus GN=Vbp1 PE=1 SV=2 - [PFD3_MOUSE]	13.27	2	3	3	8	196	22.4214	6.27783
E9Q6R3	Vesicle-trafficking protein SEC22b OS=Mus musculus GN=Sec22b PE=1 SV=1 - [E9Q6R3_MOUSE]	13.25	2	3	3	5	166	18.9106	5.92236
P83882	60S ribosomal protein L36a OS=Mus musculus GN=Rpl36a PE=1 SV=2 - [RL36A_MOUSE]	13.21	1	2	2	2	106	12.4328	10.5796
Q0VGU4	MCG18019 OS=Mus musculus GN=Vgf PE=1 SV=1 - [Q0VGU4_MOUSE]	13.13	2	5	5	10	617	68.1909	4.70361
Q9JKK7	Tropomodulin-2 OS=Mus musculus GN=Tmod2 PE=1 SV=2 - [TMOD2_MOUSE]	13.11	1	4	4	9	351	39.4866	5.35107
Q8CHP8	Glycerol-3-phosphate phosphatase OS=Mus musculus GN=Pgp PE=1 SV=1 - [PGP_MOUSE]	13.08	1	3	3	5	321	34.5187	5.35107
D3Z7C6	Prostaglandin E synthase 3 OS=Mus musculus GN=Ptges3 PE=1 SV=1 - [D3Z7C6_MOUSE]	13.08	2	2	2	2	130	14.9729	4.79248
Q3UA72	Actin-related protein 2/3 complex subunit 5 OS=Mus musculus GN=Arpc5 PE=1 SV=1 - [Q3UA72_MOUSE]	13.04	2	1	1	2	92	9.68985	5.18604
Q60692	Proteasome subunit beta type-6 OS=Mus musculus GN=Psmb6 PE=1 SV=3 - [PSB6_MOUSE]	13.03	1	4	4	12	238	25.3625	5.10986
P97825	Hematological and neurological expressed 1 protein OS=Mus musculus GN=Hn1 PE=1 SV=3 - [HN1_MOUSE]	12.99	1	2	2	3	154	16.0708	5.31299
B1AQX9	SRC kinase-signaling inhibitor 1 OS=Mus musculus GN=Srcin1 PE=1 SV=1 - [B1AQX9_MOUSE]	12.98	5	10	10	15	1217	130.53	9.24658
Q9CQZ5	NADH dehydrogenase [ubiquinone] 1 alpha subcomplex subunit 6 OS=Mus musculus GN=Ndufa6 PE=1 SV=1 - [NDUA6_MOUSE]	12.98	1	1	1	2	131	15.273	10.1108
P57746	V-type proton ATPase subunit D OS=Mus musculus GN=Atp6v1d PE=1 SV=1 - [VATD_MOUSE]	12.96	1	2	2	2	247	28.3514	9.45166
P26883	Peptidyl-prolyl cis-trans isomerase FKBP1A OS=Mus musculus GN=Fkbp1a PE=1 SV=2 - [FKB1A_MOUSE]	12.96	2	1	1	4	108	11.9151	8.1626
A0A0J9YTY0	Septin-11 OS=Mus musculus GN=Sept11 PE=1 SV=1 - [A0A0J9YTY0_MOUSE]	12.94	7	5	7	7	425	48.9481	6.96143
A0A0N4SUQ1	Plasminogen activator inhibitor 1 RNA-binding protein OS=Mus musculus GN=Serbp1 PE=1 SV=1 - [A0A0N4SUQ1_MOUSE]	12.93	6	1	1	1	147	16.0684	9.65674
Q8BTR5	Dual specificity phosphatase 28 OS=Mus musculus GN=Dusp28 PE=1 SV=1 - [DUS28_MOUSE]	12.88	1	2	2	2	163	17.4939	7.75244
Q9D1R9	60S ribosomal protein L34 OS=Mus musculus GN=Rpl34 PE=1 SV=2 - [RL34_MOUSE]	12.82	4	2	2	2	117	13.2844	11.4731
Q03517	Secretogranin-2 OS=Mus musculus GN=Scg2 PE=1 SV=1 - [SCG2_MOUSE]	12.8	2	7	7	33	617	70.6004	4.75439
P48678	Prelamin-A/C OS=Mus musculus GN=Lmna PE=1 SV=2 - [LMNA_MOUSE]	12.78	2	6	6	20	665	74.1927	6.97607
Q9CR68	Cytochrome b-c1 complex subunit Rieske, mitochondrial OS=Mus musculus GN=Uqcrfs1 PE=1 SV=1 - [UCRI_MOUSE]	12.77	1	3	3	7	274	29.3492	8.70459
P80316	T-complex protein 1 subunit epsilon OS=Mus musculus GN=Cct5 PE=1 SV=1 - [TCPE_MOUSE]	12.75	2	5	5	8	541	59.5859	6.02393
Q6P3Y6	Tetratricopeptide repeat protein 9C OS=Mus musculus GN=Ttc9c PE=1 SV=1 - [Q6P3Y6_MOUSE]	12.73	2	1	1	1	110	12.7825	9.0415
P62281	40S ribosomal protein S11 OS=Mus musculus GN=Rps11 PE=1 SV=3 - [RS11_MOUSE]	12.66	3	2	2	2	158	18.419	10.3013
G5E829	Plasma membrane calcium-transporting ATPase 1 OS=Mus musculus GN=Atp2b1 PE=1 SV=1 - [AT2B1_MOUSE]	12.62	1	6	13	49	1220	134.662	5.90967
Q9WV60	Glycogen synthase kinase-3 beta OS=Mus musculus GN=Gsk3b PE=1 SV=2 - [GSK3B_MOUSE]	12.62	2	4	4	4	420	46.6809	8.77783
Q9EQS3	C-Myc-binding protein OS=Mus musculus GN=Mycbp PE=1 SV=5 - [MYCBP_MOUSE]	12.62	2	1	1	1	103	11.9623	5.90967
Q8R404	MICOS complex subunit MIC13 OS=Mus musculus GN=Mic13 PE=1 SV=1 - [MIC13_MOUSE]	12.61	1	1	1	2	119	13.3648	8.63135
Q9EQF6	Dihydropyrimidinase-related protein 5 OS=Mus musculus GN=Dpysl5 PE=1 SV=1 - [DPYL5_MOUSE]	12.59	1	7	7	8	564	61.4773	7.09326
G5E839	T-complex protein 1 subunit delta OS=Mus musculus GN=Cct4 PE=1 SV=1 - [G5E839_MOUSE]	12.57	3	5	5	7	509	54.8271	8.01611
A0A0R4J1E3	Drebrin OS=Mus musculus GN=Dbn1 PE=1 SV=1 - [A0A0R4J1E3_MOUSE]	12.56	3	4	4	9	661	72.5	4.43701
H3BJP2	S-formylglutathione hydrolase (Fragment) OS=Mus musculus GN=Esd PE=1 SV=1 - [H3BJP2_MOUSE]	12.55	8	2	2	2	247	27.1132	6.85889
Q922Q4	Pyrroline-5-carboxylate reductase 2 OS=Mus musculus GN=Pycr2 PE=1 SV=1 - [P5CR2_MOUSE]	12.5	3	4	4	6	320	33.6376	7.76709
A2AEC2	Transcription elongation factor A protein-like 3 (Fragment) OS=Mus musculus GN=Tceal3 PE=1 SV=1 - [A2AEC2_MOUSE]	12.5	4	2	2	5	176	19.9136	5.04639
A0A0A6YY34	Glutathione peroxidase OS=Mus musculus GN=Gpx1 PE=1 SV=1 - [A0A0A6YY34_MOUSE]	12.5	3	1	1	1	144	16.3433	7.25439
A0A0J9YUE9	Dynamin-1 OS=Mus musculus GN=Dnm1 PE=1 SV=1 - [A0A0J9YUE9_MOUSE]	12.46	11	8	8	14	835	93.9742	6.63916
P50580	Proliferation-associated protein 2G4 OS=Mus musculus GN=Pa2g4 PE=1 SV=3 - [PA2G4_MOUSE]	12.44	2	4	4	5	394	43.6712	6.85889
Q6PHN9	Ras-related protein Rab-35 OS=Mus musculus GN=Rab35 PE=1 SV=1 - [RAB35_MOUSE]	12.44	39	1	2	4	201	23.0108	8.29443
G3UY38	Heterogeneous nuclear ribonucleoprotein L OS=Mus musculus GN=Hnrnpl PE=1 SV=1 - [G3UY38_MOUSE]	12.28	3	6	6	15	456	50.5325	7.50342
Q99020	Heterogeneous nuclear ribonucleoprotein A/B OS=Mus musculus GN=Hnrnpab PE=1 SV=1 - [ROAA_MOUSE]	12.28	3	2	3	3	285	30.8123	7.91357
O70439	Syntaxin-7 OS=Mus musculus GN=Stx7 PE=1 SV=3 - [STX7_MOUSE]	12.26	2	2	2	2	261	29.8023	5.78271
H3BK16	ATP synthase mitochondrial F1 complex assembly factor 1 (Fragment) OS=Mus musculus GN=Atpaf1 PE=1 SV=1 - [H3BK16_MOUSE]	12.26	4	2	2	2	212	23.4568	7.04932
D6REG4	Glyoxylate reductase/hydroxypyruvate reductase OS=Mus musculus GN=Grhpr PE=1 SV=1 - [D6REG4_MOUSE]	12.18	1	1	3	8	197	21.2491	7.79639
Q9CR00	26S proteasome non-ATPase regulatory subunit 9 OS=Mus musculus GN=Psmd9 PE=1 SV=1 - [PSMD9_MOUSE]	12.16	2	3	3	5	222	24.7046	6.43018
Q9CPY7	Cytosol aminopeptidase OS=Mus musculus GN=Lap3 PE=1 SV=3 - [AMPL_MOUSE]	12.14	2	4	4	7	519	56.1058	7.72314
P20357	Microtubule-associated protein 2 OS=Mus musculus GN=Map2 PE=1 SV=2 - [MTAP2_MOUSE]	12.14	10	20	20	68	1828	199.01	4.90674
Q9D034	Guanine nucleotide-binding protein subunit alpha-13 OS=Mus musculus GN=Gna13 PE=1 SV=1 - [Q9D034_MOUSE]	12.14	4	1	2	10	173	19.9243	9.26123
Q9JLB0	MAGUK p55 subfamily member 6 OS=Mus musculus GN=Mpp6 PE=1 SV=1 - [MPP6_MOUSE]	12.12	2	4	5	5	553	62.5915	6.40479
Q02053	Ubiquitin-like modifier-activating enzyme 1 OS=Mus musculus GN=Uba1 PE=1 SV=1 - [UBA1_MOUSE]	12.1	1	10	10	25	1058	117.734	5.65576
O88844	Isocitrate dehydrogenase [NADP] cytoplasmic OS=Mus musculus GN=Idh1 PE=1 SV=2 - [IDHC_MOUSE]	12.08	7	3	4	7	414	46.6445	7.1665
J3QM80	Heterogeneous nuclear ribonucleoprotein F (Fragment) OS=Mus musculus GN=Hnrnpf PE=1 SV=8 - [J3QM80_MOUSE]	12.07	3	2	2	3	232	26.0641	6.44287
P62077	Mitochondrial import inner membrane translocase subunit Tim8 B OS=Mus musculus GN=Timm8b PE=1 SV=1 - [TIM8B_MOUSE]	12.05	1	1	1	6	83	9.28052	5.12256
O35737	Heterogeneous nuclear ribonucleoprotein H OS=Mus musculus GN=Hnrnph1 PE=1 SV=3 - [HNRH1_MOUSE]	12.03	2	2	4	12	449	49.1684	6.30322
E9Q133	T-complex protein 1 subunit gamma OS=Mus musculus GN=Cct3 PE=1 SV=1 - [E9Q133_MOUSE]	12.03	4	5	5	7	507	56.4913	6.69775
P23927	Alpha-crystallin B chain OS=Mus musculus GN=Cryab PE=1 SV=2 - [CRYAB_MOUSE]	12	1	2	2	2	175	20.0564	7.32764
P60487	Pyridoxal phosphate phosphatase OS=Mus musculus GN=Pdxp PE=1 SV=1 - [PLPP_MOUSE]	11.99	1	3	3	6	292	31.4921	5.74463
A2AM65	Heterochromatin protein 1-binding protein 3 (Fragment) OS=Mus musculus GN=Hp1bp3 PE=1 SV=1 - [A2AM65_MOUSE]	11.99	6	3	3	3	292	32.519	9.36377
Q9CYG7	Mitochondrial import receptor subunit TOM34 OS=Mus musculus GN=Tomm34 PE=1 SV=1 - [TOM34_MOUSE]	11.97	1	2	2	4	309	34.2568	9.14404
A0A1B0GT41	L-lactate dehydrogenase A chain (Fragment) OS=Mus musculus GN=Ldha PE=1 SV=1 - [A0A1B0GT41_MOUSE]	11.93	12	1	2	9	176	19.4253	8.66064
Q76MZ3	Serine/threonine-protein phosphatase 2A 65 kDa regulatory subunit A alpha isoform OS=Mus musculus GN=Ppp2r1a PE=1 SV=3 - [2AAA_MOUSE]	11.88	7	7	7	23	589	65.2809	5.10986
Q9DB50	AP-1 complex subunit sigma-2 OS=Mus musculus GN=Ap1s2 PE=1 SV=1 - [AP1S2_MOUSE]	11.88	1	1	1	1	160	18.9169	5.47803
P83870	PHD finger-like domain-containing protein 5A OS=Mus musculus GN=Phf5a PE=1 SV=1 - [PHF5A_MOUSE]	11.82	1	1	1	1	110	12.397	8.41162
Q8C048	Calcium-transporting ATPase OS=Mus musculus GN=Atp2b3 PE=1 SV=1 - [Q8C048_MOUSE]	11.8	3	3	11	41	1144	125.634	5.64307
F8WHZ9	Alpha-adducin OS=Mus musculus GN=Add1 PE=1 SV=1 - [F8WHZ9_MOUSE]	11.78	8	4	5	25	662	73.1178	6.58057
Q8BQB5	Protein 6430548M08Rik OS=Mus musculus GN=6430548M08Rik PE=1 SV=1 - [Q8BQB5_MOUSE]	11.78	4	2	2	2	297	33.3489	4.79248
Q61316	Heat shock 70 kDa protein 4 OS=Mus musculus GN=Hspa4 PE=1 SV=1 - [HSP74_MOUSE]	11.77	2	7	9	24	841	94.0733	5.23682
Q63810	Calcineurin subunit B type 1 OS=Mus musculus GN=Ppp3r1 PE=1 SV=3 - [CANB1_MOUSE]	11.76	1	1	1	3	170	19.2876	4.80518
E0CYU5	Methionine adenosyltransferase 2 subunit beta OS=Mus musculus GN=Mat2b PE=1 SV=1 - [E0CYU5_MOUSE]	11.76	2	1	1	1	102	11.706	7.47412
Q9CQJ8	NADH dehydrogenase [ubiquinone] 1 beta subcomplex subunit 9 OS=Mus musculus GN=Ndufb9 PE=1 SV=3 - [NDUB9_MOUSE]	11.73	1	1	1	1	179	21.9697	7.79639
D6RFB9	Syntaxin-1A OS=Mus musculus GN=Stx1a PE=1 SV=1 - [D6RFB9_MOUSE]	11.72	7	2	3	4	256	29.4666	4.98291
P51163	Uroporphyrinogen-III synthase OS=Mus musculus GN=Uros PE=1 SV=1 - [HEM4_MOUSE]	11.7	1	2	2	2	265	28.4856	6.53662
Q8C845	EF-hand domain-containing protein D2 OS=Mus musculus GN=Efhd2 PE=1 SV=1 - [Q8C845_MOUSE]	11.67	2	4	4	17	240	26.7836	5.13525
O88485	Cytoplasmic dynein 1 intermediate chain 1 OS=Mus musculus GN=Dync1i1 PE=1 SV=2 - [DC1I1_MOUSE]	11.62	3	5	5	6	628	70.6806	5.12256
Q8JZS0	Protein lin-7 homolog A OS=Mus musculus GN=Lin7a PE=1 SV=2 - [LIN7A_MOUSE]	11.59	1	1	2	3	233	25.9766	8.71924
F6USD5	Mesencephalic astrocyte-derived neurotrophic factor (Fragment) OS=Mus musculus GN=Manf PE=1 SV=1 - [F6USD5_MOUSE]	11.57	5	1	1	1	121	13.7381	6.53662
Q8K207	Uncharacterized protein C1orf21 homolog OS=Mus musculus PE=1 SV=1 - [CA021_MOUSE]	11.57	1	1	1	1	121	13.8737	5.22412
B1AQZ0	Septin-8 OS=Mus musculus GN=Sept8 PE=1 SV=1 - [B1AQZ0_MOUSE]	11.57	6	2	4	4	484	55.839	6.1001
S4R2T7	Ankyrin-2 (Fragment) OS=Mus musculus GN=Ank2 PE=1 SV=2 - [S4R2T7_MOUSE]	11.48	4	3	11	17	1219	131.12	8.25049
E0CY19	cAMP-regulated phosphoprotein 21 (Fragment) OS=Mus musculus GN=Arpp21 PE=1 SV=8 - [E0CY19_MOUSE]	11.46	8	1	1	8	96	10.4612	4.94482
E0CZ78	Serine/threonine-protein phosphatase OS=Mus musculus GN=Ppp3cb PE=1 SV=1 - [E0CZ78_MOUSE]	11.45	5	1	5	9	524	59.0365	5.90967
Q8K2B3	Succinate dehydrogenase [ubiquinone] flavoprotein subunit, mitochondrial OS=Mus musculus GN=Sdha PE=1 SV=1 - [SDHA_MOUSE]	11.45	1	6	6	14	664	72.5392	7.37158
Q9DB15	39S ribosomal protein L12, mitochondrial OS=Mus musculus GN=Mrpl12 PE=1 SV=2 - [RM12_MOUSE]	11.44	1	2	2	2	201	21.6948	9.29053
Q9JJU8	SH3 domain-binding glutamic acid-rich-like protein OS=Mus musculus GN=Sh3bgrl PE=1 SV=1 - [SH3L1_MOUSE]	11.4	1	1	1	2	114	12.8032	4.91943
Q99J09	Methylosome protein 50 OS=Mus musculus GN=Wdr77 PE=1 SV=1 - [MEP50_MOUSE]	11.4	2	3	3	3	342	36.9192	5.2749
E9Q0U7	Heat shock protein 105 kDa OS=Mus musculus GN=Hsph1 PE=1 SV=1 - [E9Q0U7_MOUSE]	11.38	4	5	7	20	817	91.62	5.59229
P99026	Proteasome subunit beta type-4 OS=Mus musculus GN=Psmb4 PE=1 SV=1 - [PSB4_MOUSE]	11.36	1	2	2	3	264	29.0973	5.64307
Q8K4Z3	NAD(P)H-hydrate epimerase OS=Mus musculus GN=Naxe PE=1 SV=1 - [NNRE_MOUSE]	11.35	1	1	1	4	282	30.9528	7.69385
Q9QYG0	Protein NDRG2 OS=Mus musculus GN=Ndrg2 PE=1 SV=1 - [NDRG2_MOUSE]	11.32	1	4	4	34	371	40.7632	5.40186
Q8C2Q8	ATP synthase subunit gamma OS=Mus musculus GN=Atp5c1 PE=1 SV=1 - [Q8C2Q8_MOUSE]	11.31	7	4	4	4	274	30.2368	8.83643
P80317	T-complex protein 1 subunit zeta OS=Mus musculus GN=Cct6a PE=1 SV=3 - [TCPZ_MOUSE]	11.3	1	6	6	8	531	57.9677	7.07861
P70195	Proteasome subunit beta type-7 OS=Mus musculus GN=Psmb7 PE=1 SV=1 - [PSB7_MOUSE]	11.19	1	1	1	1	277	29.8723	7.98682
P14206	40S ribosomal protein SA OS=Mus musculus GN=Rpsa PE=1 SV=4 - [RSSA_MOUSE]	11.19	1	3	3	8	295	32.8174	4.86865
A0A0A6YX18	V-type proton ATPase subunit H OS=Mus musculus GN=Atp6v1h PE=1 SV=1 - [A0A0A6YX18_MOUSE]	11.18	4	5	5	13	465	54.0742	6.60986
A0A0R4IZX5	Neurocan core protein OS=Mus musculus GN=Ncan PE=1 SV=1 - [A0A0R4IZX5_MOUSE]	11.12	2	11	11	36	1268	137.089	5.75732
Q9DC07	LIM zinc-binding domain-containing Nebulette OS=Mus musculus GN=Nebl PE=1 SV=1 - [LNEBL_MOUSE]	11.11	2	2	2	2	270	31.0931	8.30908
P58252	Elongation factor 2 OS=Mus musculus GN=Eef2 PE=1 SV=2 - [EF2_MOUSE]	11.07	1	7	7	17	858	95.2529	6.82959
Q9CR57	60S ribosomal protein L14 OS=Mus musculus GN=Rpl14 PE=1 SV=3 - [RL14_MOUSE]	11.06	1	2	2	5	217	23.5492	11.019
Q9WV27	Sodium/potassium-transporting ATPase subunit alpha-4 OS=Mus musculus GN=Atp1a4 PE=1 SV=3 - [AT1A4_MOUSE]	11.05	1	1	10	97	1032	114.813	5.70654
P61971	Nuclear transport factor 2 OS=Mus musculus GN=Nutf2 PE=1 SV=1 - [NTF2_MOUSE]	11.02	1	1	1	1	127	14.469	5.37646
P29699	Alpha-2-HS-glycoprotein OS=Mus musculus GN=Ahsg PE=1 SV=1 - [FETUA_MOUSE]	11.01	1	2	2	4	345	37.3017	6.50732
F7CE88	Eukaryotic peptide chain release factor GTP-binding subunit ERF3A (Fragment) OS=Mus musculus GN=Gspt1 PE=4 SV=1 - [F7CE88_MOUSE]	11	3	1	1	1	100	11.2579	8.35303
P47791	Glutathione reductase, mitochondrial OS=Mus musculus GN=Gsr PE=1 SV=3 - [GSHR_MOUSE]	11	1	4	4	8	500	53.6285	7.98682
P14873	Microtubule-associated protein 1B OS=Mus musculus GN=Map1b PE=1 SV=2 - [MAP1B_MOUSE]	10.96	1	22	23	34	2464	270.089	4.83057
Q9Z130	Heterogeneous nuclear ribonucleoprotein D-like OS=Mus musculus GN=Hnrnpdl PE=1 SV=1 - [HNRDL_MOUSE]	10.96	3	3	4	12	301	33.5381	7.31299
P07309	Transthyretin OS=Mus musculus GN=Ttr PE=1 SV=1 - [TTHY_MOUSE]	10.88	1	1	1	1	147	15.766	6.16357
Q8K3J1	NADH dehydrogenase [ubiquinone] iron-sulfur protein 8, mitochondrial OS=Mus musculus GN=Ndufs8 PE=1 SV=1 - [NDUS8_MOUSE]	10.85	1	2	2	9	212	24.0228	6.21436
Q3UNH4	G protein-regulated inducer of neurite outgrowth 1 OS=Mus musculus GN=Gprin1 PE=1 SV=2 - [GRIN1_MOUSE]	10.84	1	5	5	9	932	95.4374	7.92822
P80314	T-complex protein 1 subunit beta OS=Mus musculus GN=Cct2 PE=1 SV=4 - [TCPB_MOUSE]	10.84	1	4	4	4	535	57.4411	6.40479
Q62465	Synaptic vesicle membrane protein VAT-1 homolog OS=Mus musculus GN=Vat1 PE=1 SV=3 - [VAT1_MOUSE]	10.84	1	4	4	6	406	43.069	6.3667
Q91ZJ5	UTP--glucose-1-phosphate uridylyltransferase OS=Mus musculus GN=Ugp2 PE=1 SV=3 - [UGPA_MOUSE]	10.83	1	5	5	5	508	56.9437	7.60596
Q9CQ54	NADH dehydrogenase [ubiquinone] 1 subunit C2 OS=Mus musculus GN=Ndufc2 PE=1 SV=1 - [NDUC2_MOUSE]	10.83	1	1	1	1	120	14.1542	9.20264
P24270	Catalase OS=Mus musculus GN=Cat PE=1 SV=4 - [CATA_MOUSE]	10.82	2	4	4	6	527	59.7577	7.88428
Q9CZ44	NSFL1 cofactor p47 OS=Mus musculus GN=Nsfl1c PE=1 SV=1 - [NSF1C_MOUSE]	10.81	2	4	4	7	370	40.6854	5.14795
P35802	Neuronal membrane glycoprotein M6-a OS=Mus musculus GN=Gpm6a PE=1 SV=1 - [GPM6A_MOUSE]	10.79	1	3	3	3	278	31.1284	5.2749
Q9D819	Inorganic pyrophosphatase OS=Mus musculus GN=Ppa1 PE=1 SV=1 - [IPYR_MOUSE]	10.73	1	2	2	3	289	32.6462	5.60498
O35129	Prohibitin-2 OS=Mus musculus GN=Phb2 PE=1 SV=1 - [PHB2_MOUSE]	10.7	3	2	2	2	299	33.2759	9.83252
Q99JP6	Homer protein homolog 3 OS=Mus musculus GN=Homer3 PE=1 SV=2 - [HOME3_MOUSE]	10.67	2	3	3	4	356	39.6701	5.36377
Q9EST5	Acidic leucine-rich nuclear phosphoprotein 32 family member B OS=Mus musculus GN=Anp32b PE=1 SV=1 - [AN32B_MOUSE]	10.66	2	2	3	3	272	31.0601	4.00537
P62827	GTP-binding nuclear protein Ran OS=Mus musculus GN=Ran PE=1 SV=3 - [RAN_MOUSE]	10.65	2	3	3	3	216	24.4076	7.48877
P49312	Heterogeneous nuclear ribonucleoprotein A1 OS=Mus musculus GN=Hnrnpa1 PE=1 SV=2 - [ROA1_MOUSE]	10.63	2	2	2	16	320	34.1753	9.23193
P51150	Ras-related protein Rab-7a OS=Mus musculus GN=Rab7a PE=1 SV=2 - [RAB7A_MOUSE]	10.63	1	2	2	3	207	23.4748	6.69775
Q921I1	Serotransferrin OS=Mus musculus GN=Tf PE=1 SV=1 - [TRFE_MOUSE]	10.62	7	6	6	9	697	76.6737	7.18115
Q9JHG6	Calcipressin-1 OS=Mus musculus GN=Rcan1 PE=1 SV=1 - [RCAN1_MOUSE]	10.61	2	2	2	2	198	22.6915	6.22705
Q80XI4	Phosphatidylinositol 5-phosphate 4-kinase type-2 beta OS=Mus musculus GN=Pip4k2b PE=1 SV=1 - [PI42B_MOUSE]	10.58	1	2	4	8	416	47.2888	7.32764
D3YZA1	Chromatin target of PRMT1 protein (Fragment) OS=Mus musculus GN=Chtop PE=1 SV=8 - [D3YZA1_MOUSE]	10.57	4	1	1	4	123	13.4385	12.6011
A0A0R4J1N9	Transcription factor A, mitochondrial OS=Mus musculus GN=Tfam PE=1 SV=1 - [A0A0R4J1N9_MOUSE]	10.55	3	2	2	2	199	23.3693	9.71533
B0R031	Leucine-rich repeat-containing protein 57 (Fragment) OS=Mus musculus GN=Lrrc57 PE=1 SV=1 - [B0R031_MOUSE]	10.48	4	1	1	2	124	13.8523	5.50342
D3Z6W5	TMEM9 domain family, member B, isoform CRA_a OS=Mus musculus GN=Tmem9b PE=1 SV=1 - [D3Z6W5_MOUSE]	10.48	2	1	1	1	124	14.4206	8.63135
Q9D6E4	Tetratricopeptide repeat protein 9B OS=Mus musculus GN=Ttc9b PE=1 SV=1 - [TTC9B_MOUSE]	10.46	1	1	1	1	239	25.8933	9.48096
Q8C5G6	Toll-interacting protein OS=Mus musculus GN=Tollip PE=1 SV=1 - [Q8C5G6_MOUSE]	10.45	3	2	2	2	220	24.5242	6.31592
P34884	Macrophage migration inhibitory factor OS=Mus musculus GN=Mif PE=1 SV=2 - [MIF_MOUSE]	10.43	1	1	1	4	115	12.4962	7.34229
Q6P6I8	Signal-regulatory protein alpha OS=Mus musculus GN=Sirpa PE=1 SV=1 - [Q6P6I8_MOUSE]	10.41	8	3	4	9	509	55.9514	8.27979
Q9CWE0	Mitochondrial fission regulator 1-like OS=Mus musculus GN=Mtfr1l PE=1 SV=1 - [MFR1L_MOUSE]	10.38	4	2	2	2	289	31.7062	6.1001
P0C027	Diphosphoinositol polyphosphate phosphohydrolase 3-alpha OS=Mus musculus GN=Nudt10 PE=1 SV=1 - [NUD10_MOUSE]	10.37	2	1	2	2	164	18.5813	5.69385
Q8R5C5	Beta-centractin OS=Mus musculus GN=Actr1b PE=1 SV=1 - [ACTY_MOUSE]	10.37	4	3	3	4	376	42.2547	6.40479
O70172	Phosphatidylinositol 5-phosphate 4-kinase type-2 alpha OS=Mus musculus GN=Pip4k2a PE=1 SV=1 - [PI42A_MOUSE]	10.37	2	1	3	4	405	46.1225	6.99072
P62320	Small nuclear ribonucleoprotein Sm D3 OS=Mus musculus GN=Snrpd3 PE=1 SV=1 - [SMD3_MOUSE]	10.32	1	2	2	4	126	13.9073	10.3159
Q6PER3	Microtubule-associated protein RP/EB family member 3 OS=Mus musculus GN=Mapre3 PE=1 SV=1 - [MARE3_MOUSE]	10.32	2	2	2	4	281	31.946	5.5415
F8WIK0	Anamorsin (Fragment) OS=Mus musculus GN=Ciapin1 PE=1 SV=1 - [F8WIK0_MOUSE]	10.32	2	1	1	1	126	13.5364	4.80518
Q9Z2Q6	Septin-5 OS=Mus musculus GN=Sept5 PE=1 SV=2 - [SEPT5_MOUSE]	10.3	1	3	3	4	369	42.7207	6.66846
P62334	26S protease regulatory subunit 10B OS=Mus musculus GN=Psmc6 PE=1 SV=1 - [PRS10_MOUSE]	10.28	1	3	3	4	389	44.1451	7.48877
O88745	Scrapie-responsive protein 1 OS=Mus musculus GN=Scrg1 PE=2 SV=1 - [SCRG1_MOUSE]	10.2	1	1	1	1	98	11.1656	7.91357
D3YXC2	Mitochondrial carrier homolog 1 (Fragment) OS=Mus musculus GN=Mtch1 PE=1 SV=1 - [D3YXC2_MOUSE]	10.19	2	1	1	1	108	12.1953	9.74463
Q9QZD9	Eukaryotic translation initiation factor 3 subunit I OS=Mus musculus GN=Eif3i PE=1 SV=1 - [EIF3I_MOUSE]	10.15	2	3	3	3	325	36.4376	5.64307
Q99LP6	GrpE protein homolog 1, mitochondrial OS=Mus musculus GN=Grpel1 PE=1 SV=1 - [GRPE1_MOUSE]	10.14	1	2	2	2	217	24.2919	8.38232
Q29ZQ5	Myelin-oligodendrocyte glycoprotein OS=Mus musculus GN=Mog PE=1 SV=1 - [Q29ZQ5_MOUSE]	10.1	3	3	3	5	208	23.7933	6.90283
B1B0P8	Palmitoyl-protein thioesterase 1 OS=Mus musculus GN=Ppt1 PE=1 SV=1 - [B1B0P8_MOUSE]	10.06	3	1	1	2	179	19.5367	7.85498
D3Z2C6	Gamma-glutamyltranspeptidase 1 (Fragment) OS=Mus musculus GN=Ggt1 PE=4 SV=1 - [D3Z2C6_MOUSE]	10	11	1	1	1	60	6.59957	8.54346
D3Z0T5	Protein canopy homolog 4 (Fragment) OS=Mus musculus GN=Cnpy4 PE=1 SV=1 - [D3Z0T5_MOUSE]	10	2	1	1	1	160	18.0443	6.55127
A2AWQ2	Protein RCC2 (Fragment) OS=Mus musculus GN=Rcc2 PE=1 SV=1 - [A2AWQ2_MOUSE]	10	2	1	1	1	170	17.8161	10.1108
E9Q6W2	Cytochrome c oxidase assembly factor 3 homolog, mitochondrial OS=Mus musculus GN=Coa3 PE=1 SV=1 - [E9Q6W2_MOUSE]	10	2	1	1	1	90	9.81627	11.4438
Q08331	Calretinin OS=Mus musculus GN=Calb2 PE=1 SV=3 - [CALB2_MOUSE]	9.96	1	2	2	5	271	31.3525	5.021
O35685	Nuclear migration protein nudC OS=Mus musculus GN=Nudc PE=1 SV=1 - [NUDC_MOUSE]	9.94	1	2	2	2	332	38.3343	5.26221
Q9D0M3	Cytochrome c1, heme protein, mitochondrial OS=Mus musculus GN=Cyc1 PE=1 SV=1 - [CY1_MOUSE]	9.85	1	2	2	7	325	35.3049	9.15869
Q9CX86	Heterogeneous nuclear ribonucleoprotein A0 OS=Mus musculus GN=Hnrnpa0 PE=1 SV=1 - [ROA0_MOUSE]	9.84	1	2	2	3	305	30.5117	9.30518
Q921L6	Cortactin, isoform CRA_a OS=Mus musculus GN=Cttn PE=1 SV=1 - [Q921L6_MOUSE]	9.82	2	4	4	4	509	57.0514	5.32568
Q9D8B3	Charged multivesicular body protein 4b OS=Mus musculus GN=Chmp4b PE=1 SV=2 - [CHM4B_MOUSE]	9.82	1	2	2	2	224	24.9206	4.81787
O88447	Kinesin light chain 1 OS=Mus musculus GN=Klc1 PE=1 SV=3 - [KLC1_MOUSE]	9.8	6	3	3	4	541	61.4118	5.68115
D3Z6H3	Dynactin 6, isoform CRA_b OS=Mus musculus GN=Dctn6 PE=1 SV=1 - [D3Z6H3_MOUSE]	9.73	3	1	1	1	185	20.0283	6.37939
P29387	Guanine nucleotide-binding protein subunit beta-4 OS=Mus musculus GN=Gnb4 PE=1 SV=4 - [GBB4_MOUSE]	9.71	2	1	2	3	340	37.355	6.16357
E9QPX3	NADH dehydrogenase [ubiquinone] iron-sulfur protein 4, mitochondrial OS=Mus musculus GN=Ndufs4 PE=1 SV=1 - [E9QPX3_MOUSE]	9.71	2	1	1	1	175	19.7902	9.99365
Q3TWV4	AP-2 complex subunit mu OS=Mus musculus GN=Ap2m1 PE=1 SV=1 - [Q3TWV4_MOUSE]	9.7	2	3	3	5	433	49.3579	9.53955
E9Q9P1	Leucine zipper transcription factor-like protein 1 OS=Mus musculus GN=Lztfl1 PE=1 SV=1 - [E9Q9P1_MOUSE]	9.7	2	1	1	1	134	15.509	4.95752
Q8R0F8	Acylpyruvase FAHD1, mitochondrial OS=Mus musculus GN=Fahd1 PE=1 SV=2 - [FAHD1_MOUSE]	9.69	1	1	1	1	227	25.1559	7.69385
Q9R1T4	Septin-6 OS=Mus musculus GN=Sept6 PE=1 SV=4 - [SEPT6_MOUSE]	9.68	3	2	3	5	434	49.5882	6.43018
G3UYZ1	Immunoglobulin superfamily member 8 OS=Mus musculus GN=Igsf8 PE=1 SV=1 - [G3UYZ1_MOUSE]	9.67	4	5	5	28	548	58.0957	7.91357
F6SX81	G-protein-signaling modulator 1 (Fragment) OS=Mus musculus GN=Gpsm1 PE=1 SV=1 - [F6SX81_MOUSE]	9.66	3	2	2	3	497	54.8271	6.13818
A0A0G2JDN7	Microtubule-associated protein OS=Mus musculus GN=Map4 PE=1 SV=1 - [A0A0G2JDN7_MOUSE]	9.65	9	6	6	12	902	94.4603	8.96826
F8WGT1	Adenosylhomocysteinase OS=Mus musculus GN=Ahcyl2 PE=1 SV=1 - [F8WGT1_MOUSE]	9.64	6	4	4	4	612	66.7285	7.35693
P28474	Alcohol dehydrogenase class-3 OS=Mus musculus GN=Adh5 PE=1 SV=3 - [ADHX_MOUSE]	9.63	1	2	2	2	374	39.5221	7.25439
O55106	Striatin OS=Mus musculus GN=Strn PE=1 SV=2 - [STRN_MOUSE]	9.62	4	5	6	7	780	85.9127	5.2749
Q9CXW3	Calcyclin-binding protein OS=Mus musculus GN=Cacybp PE=1 SV=1 - [CYBP_MOUSE]	9.61	1	2	2	3	229	26.4938	7.86963
F8WIX8	Histone H2A OS=Mus musculus GN=Hist1h2al PE=3 SV=1 - [F8WIX8_MOUSE]	9.6	13	1	2	8	125	13.5987	10.7407
Q9QYF9	Protein NDRG3 OS=Mus musculus GN=Ndrg3 PE=1 SV=1 - [NDRG3_MOUSE]	9.6	3	4	4	5	375	41.5285	5.24951
P08752	Guanine nucleotide-binding protein G(i) subunit alpha-2 OS=Mus musculus GN=Gnai2 PE=1 SV=5 - [GNAI2_MOUSE]	9.58	16	1	4	13	355	40.463	5.45264
Q80WR5	UPF0688 protein C1orf174 homolog OS=Mus musculus PE=1 SV=1 - [CA174_MOUSE]	9.57	1	1	1	5	230	24.7591	6.03662
Q640R3	Hepatocyte cell adhesion molecule OS=Mus musculus GN=Hepacam PE=1 SV=2 - [HECAM_MOUSE]	9.57	1	2	2	4	418	46.3384	9.42236
D3YXZ3	Kinesin light chain 2 OS=Mus musculus GN=Klc2 PE=1 SV=1 - [D3YXZ3_MOUSE]	9.56	4	5	5	10	617	68.1349	7.06396
D3YVF0	A-kinase anchor protein 5 OS=Mus musculus GN=Akap5 PE=1 SV=2 - [AKAP5_MOUSE]	9.53	2	4	4	13	745	79.3495	4.75439
Q9CRC6	BLOC-1-related complex subunit 7 OS=Mus musculus GN=Borcs7 PE=1 SV=1 - [BORC7_MOUSE]	9.52	1	1	1	2	105	11.539	6.78564
P45376	Aldose reductase OS=Mus musculus GN=Akr1b1 PE=1 SV=3 - [ALDR_MOUSE]	9.49	1	3	3	7	316	35.7095	7.18115
G5E846	Peripherin OS=Mus musculus GN=Prph PE=1 SV=1 - [G5E846_MOUSE]	9.47	3	3	3	6	475	54.2646	5.51611
A0A0N4SUN5	Nuclear receptor-interacting protein 2 (Fragment) OS=Mus musculus GN=Nrip2 PE=4 SV=1 - [A0A0N4SUN5_MOUSE]	9.47	4	1	1	1	190	20.9779	8.20654
Q9CR95	Adaptin ear-binding coat-associated protein 1 OS=Mus musculus GN=Necap1 PE=1 SV=2 - [NECP1_MOUSE]	9.45	1	2	2	4	275	29.6211	6.37939
Q00493	Carboxypeptidase E OS=Mus musculus GN=Cpe PE=1 SV=2 - [CBPE_MOUSE]	9.45	1	3	3	3	476	53.2223	5.18604
P12960	Contactin-1 OS=Mus musculus GN=Cntn1 PE=1 SV=1 - [CNTN1_MOUSE]	9.41	1	6	6	12	1020	113.317	6.16357
S4R225	WD repeat-containing protein 13 OS=Mus musculus GN=Wdr13 PE=1 SV=1 - [S4R225_MOUSE]	9.41	3	2	2	2	393	42.9775	7.45947
A0A0A6YWA8	Translocon-associated protein subunit beta (Fragment) OS=Mus musculus GN=Ssr2 PE=1 SV=1 - [A0A0A6YWA8_MOUSE]	9.4	4	1	1	1	117	12.7266	4.93213
E9Q4M4	MICOS complex subunit OS=Mus musculus GN=Chchd6 PE=1 SV=1 - [E9Q4M4_MOUSE]	9.39	2	2	2	3	245	26.3716	8.6167
O09167	60S ribosomal protein L21 OS=Mus musculus GN=Rpl21 PE=1 SV=3 - [RL21_MOUSE]	9.38	2	1	1	1	160	18.5501	10.4917
P62881	Guanine nucleotide-binding protein subunit beta-5 OS=Mus musculus GN=Gnb5 PE=1 SV=1 - [GBB5_MOUSE]	9.37	1	2	2	3	395	43.5369	6.45557
P32921	Tryptophan--tRNA ligase, cytoplasmic OS=Mus musculus GN=Wars PE=1 SV=2 - [SYWC_MOUSE]	9.36	1	3	3	10	481	54.3231	6.88818
D3Z1U9	NADH dehydrogenase [ubiquinone] flavoprotein 1, mitochondrial OS=Mus musculus GN=Ndufv1 PE=1 SV=1 - [D3Z1U9_MOUSE]	9.35	3	3	3	5	385	41.8069	6.96143
D3Z5R4	WAS/WASL-interacting protein family member 3 OS=Mus musculus GN=Wipf3 PE=1 SV=1 - [D3Z5R4_MOUSE]	9.35	3	3	3	3	449	45.1101	10.8433
Q63912	Oligodendrocyte-myelin glycoprotein OS=Mus musculus GN=Omg PE=1 SV=1 - [OMGP_MOUSE]	9.32	2	3	3	12	440	49.252	8.41162
O35226	26S proteasome non-ATPase regulatory subunit 4 OS=Mus musculus GN=Psmd4 PE=1 SV=1 - [PSMD4_MOUSE]	9.31	2	3	3	3	376	40.6782	4.79248
Q68FD5	Clathrin heavy chain 1 OS=Mus musculus GN=Cltc PE=1 SV=3 - [CLH1_MOUSE]	9.31	2	13	13	81	1675	191.435	5.69385
E9PZI9	OX-2 membrane glycoprotein OS=Mus musculus GN=Cd200 PE=1 SV=1 - [E9PZI9_MOUSE]	9.3	5	1	1	1	129	14.2982	7.81104
I3ITR1	MCG50313 OS=Mus musculus GN=AK157302 PE=4 SV=1 - [I3ITR1_MOUSE]	9.3	2	1	1	1	129	14.2094	8.85107
G5E8S7	NmrA-like family domain containing 1, isoform CRA_a OS=Mus musculus GN=Nmral1 PE=1 SV=1 - [G5E8S7_MOUSE]	9.28	3	2	2	2	291	31.6922	8.32373
Q5SQY2	Biorientation of chromosomes in cell division protein 1 OS=Mus musculus GN=Bod1 PE=3 SV=1 - [BOD1_MOUSE]	9.25	2	1	1	1	173	18.3523	5.89697
P60867	40S ribosomal protein S20 OS=Mus musculus GN=Rps20 PE=1 SV=1 - [RS20_MOUSE]	9.24	1	1	1	1	119	13.3643	9.93506
J3QN38	Protein Gm21972 (Fragment) OS=Mus musculus GN=Gm21972 PE=4 SV=1 - [J3QN38_MOUSE]	9.18	2	1	1	1	98	11.2225	4.41162
P57759	Endoplasmic reticulum resident protein 29 OS=Mus musculus GN=Erp29 PE=1 SV=2 - [ERP29_MOUSE]	9.16	1	2	2	4	262	28.8051	6.15088
Q9DBG5	Perilipin-3 OS=Mus musculus GN=Plin3 PE=1 SV=1 - [PLIN3_MOUSE]	9.15	1	3	3	3	437	47.233	5.61768
G3UXJ6	Heterogeneous nuclear ribonucleoprotein Q OS=Mus musculus GN=Syncrip PE=1 SV=1 - [G3UXJ6_MOUSE]	9.15	12	2	5	7	448	49.6737	7.18115
A0A0A6YX02	Ragulator complex protein LAMTOR1 OS=Mus musculus GN=Lamtor1 PE=1 SV=1 - [A0A0A6YX02_MOUSE]	9.15	2	1	1	2	142	15.7287	5.45264
P06745	Glucose-6-phosphate isomerase OS=Mus musculus GN=Gpi PE=1 SV=4 - [G6PI_MOUSE]	9.14	2	4	4	4	558	62.7272	8.1333
Q9JLJ2	4-trimethylaminobutyraldehyde dehydrogenase OS=Mus musculus GN=Aldh9a1 PE=1 SV=1 - [AL9A1_MOUSE]	9.11	2	3	3	4	494	53.4801	6.97607
Q6YJU1	Fetuin-B OS=Mus musculus GN=Fetub PE=1 SV=1 - [Q6YJU1_MOUSE]	9.09	2	1	1	1	308	33.8579	6.53662
D5MCW4	Protein CutA OS=Mus musculus GN=Cuta PE=1 SV=1 - [D5MCW4_MOUSE]	9.09	2	1	1	1	154	16.4426	6.29053
Q5M8N4	Epimerase family protein SDR39U1 OS=Mus musculus GN=Sdr39u1 PE=1 SV=1 - [D39U1_MOUSE]	9.09	1	3	3	4	308	32.9743	8.90967
A2AC05	Tether-containing UBX domain for GLUT4 (Fragment) OS=Mus musculus GN=Aspscr1 PE=1 SV=1 - [A2AC05_MOUSE]	9.09	2	1	1	1	220	22.9755	8.66064
G3XA10	Heterogeneous nuclear ribonucleoprotein U OS=Mus musculus GN=Gm28062 PE=1 SV=1 - [G3XA10_MOUSE]	9.08	2	6	6	26	793	86.7513	5.92236
A0A0G2JGQ6	Serine/threonine-protein kinase DCLK1 OS=Mus musculus GN=Dclk1 PE=1 SV=1 - [A0A0G2JGQ6_MOUSE]	9.07	6	3	3	5	739	82.0539	8.66064
A0A1B0GSR4	RuvB-like 2 (Fragment) OS=Mus musculus GN=Ruvbl2 PE=1 SV=1 - [A0A1B0GSR4_MOUSE]	9.05	4	2	2	2	221	23.5124	8.88037
B2RSH2	Guanine nucleotide-binding protein G(i) subunit alpha-1 OS=Mus musculus GN=Gnai1 PE=1 SV=1 - [GNAI1_MOUSE]	9.04	15	1	4	13	354	40.3352	5.97314
Q3TY60	Protein FAM131B OS=Mus musculus GN=Fam131b PE=1 SV=1 - [F131B_MOUSE]	9.04	2	2	2	2	332	35.9355	4.44971
P12970	60S ribosomal protein L7a OS=Mus musculus GN=Rpl7a PE=1 SV=2 - [RL7A_MOUSE]	9.02	4	2	2	4	266	29.958	10.5649
P42125	Enoyl-CoA delta isomerase 1, mitochondrial OS=Mus musculus GN=Eci1 PE=1 SV=2 - [ECI1_MOUSE]	9	1	2	2	4	289	32.2298	8.98291
Q8BNW9	Kelch repeat and BTB domain-containing protein 11 OS=Mus musculus GN=Kbtbd11 PE=1 SV=3 - [KBTBB_MOUSE]	9	1	4	4	5	633	67.9036	5.38916
Q8CDN6	Thioredoxin-like protein 1 OS=Mus musculus GN=Txnl1 PE=1 SV=3 - [TXNL1_MOUSE]	9	1	2	2	2	289	32.2167	4.95752
Q8VDK1	Nitrilase homolog 1 OS=Mus musculus GN=Nit1 PE=1 SV=2 - [NIT1_MOUSE]	8.98	1	2	2	3	323	35.682	7.94287
Q9DCC8	Mitochondrial import receptor subunit TOM20 homolog OS=Mus musculus GN=Tomm20 PE=1 SV=1 - [TOM20_MOUSE]	8.97	1	1	1	17	145	16.2736	8.60205
Q5SXA5	TOM1-like protein 2 OS=Mus musculus GN=Tom1l2 PE=1 SV=1 - [Q5SXA5_MOUSE]	8.97	5	3	3	5	457	50.0388	4.67822
D3Z1L8	Glutamate decarboxylase 1 OS=Mus musculus GN=Gad1 PE=1 SV=1 - [D3Z1L8_MOUSE]	8.97	3	2	2	3	223	25.0724	6.29053
Q9CX34	Protein SGT1 homolog OS=Mus musculus GN=Sugt1 PE=1 SV=3 - [SGT1_MOUSE]	8.93	1	2	2	2	336	38.135	5.45264
O88342	WD repeat-containing protein 1 OS=Mus musculus GN=Wdr1 PE=1 SV=3 - [WDR1_MOUSE]	8.91	2	5	5	8	606	66.365	6.59521
Q00915	Retinol-binding protein 1 OS=Mus musculus GN=Rbp1 PE=1 SV=2 - [RET1_MOUSE]	8.89	1	1	1	2	135	15.8358	5.24951
P08030	Adenine phosphoribosyltransferase OS=Mus musculus GN=Aprt PE=1 SV=2 - [APT_MOUSE]	8.89	1	1	1	1	180	19.7115	6.78564
Q3U4W8	Ubiquitin carboxyl-terminal hydrolase 5 OS=Mus musculus GN=Usp5 PE=1 SV=1 - [Q3U4W8_MOUSE]	8.86	3	5	5	13	835	93.2954	5.05908
A0A140LHL5	NAD-dependent protein deacetylase sirtuin-2 OS=Mus musculus GN=Sirt2 PE=1 SV=1 - [A0A140LHL5_MOUSE]	8.83	2	3	3	15	351	39.3998	6.771
P50247	Adenosylhomocysteinase OS=Mus musculus GN=Ahcy PE=1 SV=3 - [SAHH_MOUSE]	8.8	2	4	4	4	432	47.6573	6.53662
Q9QXT0	Protein canopy homolog 2 OS=Mus musculus GN=Cnpy2 PE=1 SV=1 - [CNPY2_MOUSE]	8.79	1	1	1	4	182	20.7543	5.07178
O08915	AH receptor-interacting protein OS=Mus musculus GN=Aip PE=1 SV=1 - [AIP_MOUSE]	8.79	2	2	2	3	330	37.5811	6.40479
P16627	Heat shock 70 kDa protein 1-like OS=Mus musculus GN=Hspa1l PE=1 SV=4 - [HS71L_MOUSE]	8.74	3	1	4	27	641	70.5932	6.23975
Q8VHL1	Histone-lysine N-methyltransferase SETD7 OS=Mus musculus GN=Setd7 PE=1 SV=2 - [SETD7_MOUSE]	8.74	1	2	2	4	366	40.4811	4.65283
Q80XD3	Regulator of G-protein-signaling 7 OS=Mus musculus GN=Rgs7 PE=1 SV=1 - [Q80XD3_MOUSE]	8.72	6	4	4	4	470	54.9798	7.85498
Q9QUP5	Hyaluronan and proteoglycan link protein 1 OS=Mus musculus GN=Hapln1 PE=1 SV=1 - [HPLN1_MOUSE]	8.71	1	4	4	4	356	40.4522	7.79639
Q99LF4	tRNA-splicing ligase RtcB homolog OS=Mus musculus GN=Rtcb PE=1 SV=1 - [RTCB_MOUSE]	8.71	1	3	3	3	505	55.2139	7.2251
Q921J2	GTP-binding protein Rheb OS=Mus musculus GN=Rheb PE=1 SV=1 - [RHEB_MOUSE]	8.7	1	1	1	1	184	20.4385	5.92236
P70333	Heterogeneous nuclear ribonucleoprotein H2 OS=Mus musculus GN=Hnrnph2 PE=1 SV=1 - [HNRH2_MOUSE]	8.69	1	1	3	11	449	49.2483	6.30322
A0A0A6YX73	cAMP-dependent protein kinase type II-alpha regulatory subunit OS=Mus musculus GN=Prkar2a PE=1 SV=1 - [A0A0A6YX73_MOUSE]	8.68	3	3	3	7	380	43.1384	4.93213
Q8C4W3	Neuritin-like protein OS=Mus musculus GN=Nrn1l PE=2 SV=2 - [NRN1L_MOUSE]	8.64	1	1	1	1	162	17.3787	7.2251
P46414	Cyclin-dependent kinase inhibitor 1B OS=Mus musculus GN=Cdkn1b PE=1 SV=2 - [CDN1B_MOUSE]	8.63	1	2	2	4	197	22.1797	7.02002
Q6DFY2	Opioid binding protein/cell adhesion molecule-like OS=Mus musculus GN=Opcml PE=1 SV=1 - [Q6DFY2_MOUSE]	8.61	2	3	3	5	337	37.1328	6.68311
Q9D6J5	NADH dehydrogenase [ubiquinone] 1 beta subcomplex subunit 8, mitochondrial OS=Mus musculus GN=Ndufb8 PE=1 SV=1 - [NDUB8_MOUSE]	8.6	1	1	1	1	186	21.8615	6.63916
Q9CY16	28S ribosomal protein S28, mitochondrial OS=Mus musculus GN=Mrps28 PE=1 SV=1 - [RT28_MOUSE]	8.6	1	1	1	1	186	20.5077	8.92432
Q9DCZ4	MICOS complex subunit Mic26 OS=Mus musculus GN=Apoo PE=1 SV=2 - [MIC26_MOUSE]	8.59	1	2	2	4	198	22.5896	9.24658
K3W4T3	V-type proton ATPase subunit a OS=Mus musculus GN=Atp6v0a1 PE=1 SV=1 - [K3W4T3_MOUSE]	8.59	3	5	5	14	838	96.3642	6.84424
A0A0U1RPK4	4F2 cell-surface antigen heavy chain OS=Mus musculus GN=Slc3a2 PE=1 SV=1 - [A0A0U1RPK4_MOUSE]	8.58	2	2	2	9	303	33.6723	5.35107
P10639	Thioredoxin OS=Mus musculus GN=Txn PE=1 SV=3 - [THIO_MOUSE]	8.57	1	1	1	1	105	11.6676	4.91943
Q9WUD1	STIP1 homology and U box-containing protein 1 OS=Mus musculus GN=Stub1 PE=1 SV=1 - [CHIP_MOUSE]	8.55	1	1	2	2	304	34.8873	6.01123
A2AH29	ADP-ribose pyrophosphatase, mitochondrial (Fragment) OS=Mus musculus GN=Nudt9 PE=1 SV=1 - [A2AH29_MOUSE]	8.55	4	1	1	1	152	16.8235	9.26123
P14733	Lamin-B1 OS=Mus musculus GN=Lmnb1 PE=1 SV=3 - [LMNB1_MOUSE]	8.5	1	2	3	5	588	66.7448	5.16064
F6VNW5	Glutamate--cysteine ligase regulatory subunit (Fragment) OS=Mus musculus GN=Gclm PE=1 SV=1 - [F6VNW5_MOUSE]	8.5	3	1	1	2	153	16.9866	5.59229
Q8BHL8	Proteasome inhibitor PI31 subunit OS=Mus musculus GN=Psmf1 PE=1 SV=1 - [PSMF1_MOUSE]	8.49	1	1	1	2	271	29.6458	5.24951
D3Z5N9	MCG49198 OS=Mus musculus GN=Gm5449 PE=4 SV=1 - [D3Z5N9_MOUSE]	8.47	2	1	1	1	118	13.5371	9.68604
Q99LC3	NADH dehydrogenase [ubiquinone] 1 alpha subcomplex subunit 10, mitochondrial OS=Mus musculus GN=Ndufa10 PE=1 SV=1 - [NDUAA_MOUSE]	8.45	1	2	2	2	355	40.5777	7.78174
A0A0J9YUK4	Cytoplasmic protein NCK2 (Fragment) OS=Mus musculus GN=Nck2 PE=1 SV=1 - [A0A0J9YUK4_MOUSE]	8.45	2	1	1	1	142	16.1854	9.11475
A2A7U0	Protein Zmym1 (Fragment) OS=Mus musculus GN=Zmym1 PE=1 SV=1 - [A2A7U0_MOUSE]	8.43	3	1	1	1	83	9.0345	8.60205
Q922Y1	UBX domain-containing protein 1 OS=Mus musculus GN=Ubxn1 PE=1 SV=1 - [UBXN1_MOUSE]	8.42	1	2	2	2	297	33.552	5.26221
Q80UW2	F-box only protein 2 OS=Mus musculus GN=Fbxo2 PE=1 SV=1 - [FBX2_MOUSE]	8.42	1	2	2	41	297	33.6551	4.28467
E9Q8N8	Anion exchange protein OS=Mus musculus GN=Slc4a4 PE=1 SV=1 - [E9Q8N8_MOUSE]	8.41	4	6	6	8	1094	123.008	6.88818
P31230	Aminoacyl tRNA synthase complex-interacting multifunctional protein 1 OS=Mus musculus GN=Aimp1 PE=1 SV=2 - [AIMP1_MOUSE]	8.39	2	2	2	3	310	33.9759	8.35303
Q8K2C6	NAD-dependent protein deacylase sirtuin-5, mitochondrial OS=Mus musculus GN=Sirt5 PE=1 SV=1 - [SIR5_MOUSE]	8.39	1	2	2	2	310	34.1122	8.52881
A0A0A0MQM3	NADH-cytochrome b5 reductase 3 (Fragment) OS=Mus musculus GN=Cyb5r3 PE=1 SV=6 - [A0A0A0MQM3_MOUSE]	8.39	3	1	1	1	143	16.2096	9.65674
Q62443	Neuronal pentraxin-1 OS=Mus musculus GN=Nptx1 PE=1 SV=1 - [NPTX1_MOUSE]	8.33	1	2	2	5	432	47.0878	6.44287
E0CYQ2	NudC domain-containing protein 2 OS=Mus musculus GN=Nudcd2 PE=1 SV=1 - [E0CYQ2_MOUSE]	8.33	2	1	1	4	132	14.7202	4.67822
D3YXH5	Sideroflexin-5 OS=Mus musculus GN=Sfxn5 PE=1 SV=1 - [D3YXH5_MOUSE]	8.33	3	1	1	1	108	11.933	6.78564
Z4YLT8	RING finger protein 11 (Fragment) OS=Mus musculus GN=Rnf11 PE=1 SV=1 - [Z4YLT8_MOUSE]	8.33	2	1	1	1	144	16.3968	4.84326
A0A140LHI9	Sodium- and chloride-dependent glycine transporter 2 OS=Mus musculus GN=Slc6a5 PE=1 SV=1 - [A0A140LHI9_MOUSE]	8.29	3	1	1	1	181	18.3211	6.91748
Q8R2Y8	Peptidyl-tRNA hydrolase 2, mitochondrial OS=Mus musculus GN=Ptrh2 PE=1 SV=1 - [PTH2_MOUSE]	8.29	1	1	1	1	181	19.514	7.41553
Q9QYB8	Beta-adducin OS=Mus musculus GN=Add2 PE=1 SV=4 - [ADDB_MOUSE]	8.28	2	4	5	16	725	80.5913	6.21436
Q8BP67	60S ribosomal protein L24 OS=Mus musculus GN=Rpl24 PE=1 SV=2 - [RL24_MOUSE]	8.28	1	1	1	4	157	17.7679	11.2534
Q61361	Brevican core protein OS=Mus musculus GN=Bcan PE=1 SV=2 - [PGCB_MOUSE]	8.27	1	8	8	36	883	95.7549	4.93213
Q06890	Clusterin OS=Mus musculus GN=Clu PE=1 SV=1 - [CLUS_MOUSE]	8.26	6	2	2	3	448	51.6226	5.66846
A0A0A6YW88	CaM kinase-like vesicle-associated protein OS=Mus musculus GN=Camkv PE=1 SV=1 - [A0A0A6YW88_MOUSE]	8.26	2	3	3	9	484	51.6428	5.45264
B1ATL6	Dual-specificity mitogen-activated protein kinase kinase 4 (Fragment) OS=Mus musculus GN=Map2k4 PE=1 SV=1 - [B1ATL6_MOUSE]	8.25	2	1	1	1	206	22.4612	8.646
Q9QZB9	Dynactin subunit 5 OS=Mus musculus GN=Dctn5 PE=1 SV=1 - [DCTN5_MOUSE]	8.24	1	1	1	1	182	20.1273	8.01611
Q9QYJ3	DnaJ homolog subfamily B member 1 OS=Mus musculus GN=Dnajb1 PE=1 SV=3 - [DNJB1_MOUSE]	8.24	2	2	2	2	340	38.1434	8.63135
O08583	THO complex subunit 4 OS=Mus musculus GN=Alyref PE=1 SV=3 - [THOC4_MOUSE]	8.24	1	1	1	1	255	26.9236	11.1509
P40124	Adenylyl cyclase-associated protein 1 OS=Mus musculus GN=Cap1 PE=1 SV=4 - [CAP1_MOUSE]	8.23	1	3	3	3	474	51.5324	7.51807
D3Z396	Neurotrimin OS=Mus musculus GN=Ntm PE=1 SV=1 - [D3Z396_MOUSE]	8.23	3	2	2	3	316	34.9327	6.96143
P43006	Excitatory amino acid transporter 2 OS=Mus musculus GN=Slc1a2 PE=1 SV=1 - [EAA2_MOUSE]	8.22	5	4	4	13	572	61.9896	6.68311
P20108	Thioredoxin-dependent peroxide reductase, mitochondrial OS=Mus musculus GN=Prdx3 PE=1 SV=1 - [PRDX3_MOUSE]	8.17	1	2	2	3	257	28.1094	7.57666
Q8K0Z7	Translational activator of cytochrome c oxidase 1 OS=Mus musculus GN=Taco1 PE=1 SV=1 - [TACO1_MOUSE]	8.16	1	1	1	1	294	32.2935	8.11865
Q9D1C8	Vacuolar protein sorting-associated protein 28 homolog OS=Mus musculus GN=Vps28 PE=1 SV=1 - [VPS28_MOUSE]	8.14	1	1	1	1	221	25.4357	5.5415
P62715	Serine/threonine-protein phosphatase 2A catalytic subunit beta isoform OS=Mus musculus GN=Ppp2cb PE=1 SV=1 - [PP2AB_MOUSE]	8.09	2	1	1	1	309	35.5523	5.42725
Q9D735	Uncharacterized protein C19orf43 homolog OS=Mus musculus PE=1 SV=1 - [CS043_MOUSE]	8.09	1	1	1	1	173	18.3653	9.67139
Q6R891	Neurabin-2 OS=Mus musculus GN=Ppp1r9b PE=1 SV=1 - [NEB2_MOUSE]	8.08	1	4	4	5	817	89.4657	4.91943
Q9WUK2	Eukaryotic translation initiation factor 4H OS=Mus musculus GN=Eif4h PE=1 SV=3 - [IF4H_MOUSE]	8.06	1	2	2	8	248	27.3244	7.2251
Q6NVE9	Protein phosphatase PTC7 homolog OS=Mus musculus GN=Pptc7 PE=1 SV=1 - [PPTC7_MOUSE]	8.06	1	2	2	2	310	33.0273	5.2749
Q8VCI5	Peroxisomal biogenesis factor 19 OS=Mus musculus GN=Pex19 PE=1 SV=1 - [PEX19_MOUSE]	8.03	1	1	1	1	299	32.7126	4.33545
P62900	60S ribosomal protein L31 OS=Mus musculus GN=Rpl31 PE=1 SV=1 - [RL31_MOUSE]	8	1	1	1	1	125	14.4539	10.5356
B0V2N8	Annexin (Fragment) OS=Mus musculus GN=Anxa2 PE=1 SV=1 - [B0V2N8_MOUSE]	7.95	3	1	1	1	176	19.5841	5.96045
O35658	Complement component 1 Q subcomponent-binding protein, mitochondrial OS=Mus musculus GN=C1qbp PE=1 SV=1 - [C1QBP_MOUSE]	7.91	2	3	3	21	278	30.9935	4.91943
B2FDG7	28S ribosomal protein S5, mitochondrial (Fragment) OS=Mus musculus GN=Mrps5 PE=1 SV=1 - [B2FDG7_MOUSE]	7.91	2	1	1	1	139	15.0348	10.7554
Q3UYN2	Copine-6 OS=Mus musculus GN=Cpne6 PE=1 SV=1 - [Q3UYN2_MOUSE]	7.91	3	3	3	3	556	61.6135	5.50342
Q80Y14	Glutaredoxin-related protein 5, mitochondrial OS=Mus musculus GN=Glrx5 PE=1 SV=2 - [GLRX5_MOUSE]	7.89	1	1	1	1	152	16.2824	6.55127
P31001	Desmin OS=Mus musculus GN=Des PE=1 SV=3 - [DESM_MOUSE]	7.89	1	1	4	6	469	53.465	5.2749
Q8BYI9	Tenascin-R OS=Mus musculus GN=Tnr PE=1 SV=2 - [TENR_MOUSE]	7.88	2	6	6	22	1358	149.495	4.94482
Q68FG2	Protein Sptbn2 OS=Mus musculus GN=Sptbn2 PE=1 SV=1 - [Q68FG2_MOUSE]	7.87	1	11	13	25	2388	270.756	5.85889
Q9D898	Actin-related protein 2/3 complex subunit 5-like protein OS=Mus musculus GN=Arpc5l PE=1 SV=1 - [ARP5L_MOUSE]	7.84	1	1	1	2	153	16.9698	6.80029
O55126	Protein NipSnap homolog 2 OS=Mus musculus GN=Gbas PE=1 SV=1 - [NIPS2_MOUSE]	7.83	2	2	2	7	281	32.9119	9.26123
P53026	60S ribosomal protein L10a OS=Mus musculus GN=Rpl10a PE=1 SV=3 - [RL10A_MOUSE]	7.83	2	2	2	2	217	24.9006	9.979
P62855	40S ribosomal protein S26 OS=Mus musculus GN=Rps26 PE=1 SV=3 - [RS26_MOUSE]	7.83	1	1	1	1	115	13.0071	11.0044
P63085	Mitogen-activated protein kinase 1 OS=Mus musculus GN=Mapk1 PE=1 SV=3 - [MK01_MOUSE]	7.82	16	1	3	3	358	41.2492	6.97607
F6UND7	Tyrosine-protein kinase OS=Mus musculus GN=Hck PE=1 SV=1 - [F6UND7_MOUSE]	7.82	64	3	3	4	524	59.0736	7.23975
D3YUM8	Proteasome subunit beta type OS=Mus musculus GN=Gm4950 PE=1 SV=1 - [D3YUM8_MOUSE]	7.8	2	1	1	1	205	22.9604	6.88818
F7AAP4	Calcium-transporting ATPase OS=Mus musculus GN=Atp2b4 PE=1 SV=1 - [F7AAP4_MOUSE]	7.8	3	5	8	21	1166	128.48	6.53662
Q99JY0	Trifunctional enzyme subunit beta, mitochondrial OS=Mus musculus GN=Hadhb PE=1 SV=1 - [ECHB_MOUSE]	7.79	5	4	4	6	475	51.3534	9.37842
Q91X52	L-xylulose reductase OS=Mus musculus GN=Dcxr PE=1 SV=2 - [DCXR_MOUSE]	7.79	2	2	2	2	244	25.7294	7.31299
Q9CQQ8	U6 snRNA-associated Sm-like protein LSm7 OS=Mus musculus GN=Lsm7 PE=1 SV=1 - [LSM7_MOUSE]	7.77	1	1	1	1	103	11.629	5.2749
Q9CZU6	Citrate synthase, mitochondrial OS=Mus musculus GN=Cs PE=1 SV=1 - [CISY_MOUSE]	7.76	2	3	3	3	464	51.7034	8.57275
D3Z263	Protein Rtca (Fragment) OS=Mus musculus GN=Rtca PE=1 SV=1 - [D3Z263_MOUSE]	7.75	2	1	1	1	142	15.5042	9.45166
Q00897	Alpha-1-antitrypsin 1-4 OS=Mus musculus GN=Serpina1d PE=1 SV=1 - [A1AT4_MOUSE]	7.75	2	2	2	4	413	45.9694	5.43994
Q9CQI3	Glia maturation factor beta OS=Mus musculus GN=Gmfb PE=1 SV=3 - [GMFB_MOUSE]	7.75	4	2	2	2	142	16.7124	5.16064
A0A087WP24	Protein ABHD14B (Fragment) OS=Mus musculus GN=Abhd14b PE=1 SV=1 - [A0A087WP24_MOUSE]	7.75	7	1	1	1	142	14.9389	7.35693
A0A0R4J0Z3	Aquaporin 4, isoform CRA_a OS=Mus musculus GN=Aqp4 PE=1 SV=1 - [A0A0R4J0Z3_MOUSE]	7.74	2	2	2	2	323	34.5128	7.69385
P62267	40S ribosomal protein S23 OS=Mus musculus GN=Rps23 PE=1 SV=3 - [RS23_MOUSE]	7.69	1	1	1	1	143	15.7977	10.4917
Q8CEJ2	MCG117705, isoform CRA_a OS=Mus musculus GN=Uxt PE=1 SV=1 - [Q8CEJ2_MOUSE]	7.64	2	1	1	1	157	18.1754	5.80811
Q91Z53	Glyoxylate reductase/hydroxypyruvate reductase OS=Mus musculus GN=Grhpr PE=1 SV=1 - [GRHPR_MOUSE]	7.62	1	1	3	8	328	35.3065	7.6499
Q3U5Q7	UMP-CMP kinase 2, mitochondrial OS=Mus musculus GN=Cmpk2 PE=1 SV=2 - [CMPK2_MOUSE]	7.61	1	3	3	5	447	50.0047	7.26904
S4R1F6	RNA binding motif protein, X chromosome, isoform CRA_a OS=Mus musculus GN=Rbmx PE=1 SV=1 - [S4R1F6_MOUSE]	7.6	4	1	1	1	263	28.6813	9.89111
Q52KF7	Disks large homolog 3 OS=Mus musculus GN=Dlg3 PE=1 SV=1 - [Q52KF7_MOUSE]	7.59	8	3	5	7	817	90.2716	7.03467
F8WIS0	C-C chemokine receptor type 9 OS=Mus musculus GN=Ccr9 PE=3 SV=1 - [F8WIS0_MOUSE]	7.56	2	1	1	1	357	40.6139	8.99756
D3Z2Y8	D-beta-hydroxybutyrate dehydrogenase, mitochondrial (Fragment) OS=Mus musculus GN=Bdh1 PE=1 SV=1 - [D3Z2Y8_MOUSE]	7.55	2	1	1	2	265	29.128	9.61279
H3BKL5	3-ketoacyl-CoA thiolase A, peroxisomal OS=Mus musculus GN=Acaa1a PE=1 SV=1 - [H3BKL5_MOUSE]	7.51	4	2	2	2	373	38.3375	8.54346
Q9D6W8	BLOC-1-related complex subunit 6 OS=Mus musculus GN=Borcs6 PE=1 SV=1 - [BORC6_MOUSE]	7.5	1	1	1	1	360	37.988	5.33838
O09131	Glutathione S-transferase omega-1 OS=Mus musculus GN=Gsto1 PE=1 SV=2 - [GSTO1_MOUSE]	7.5	1	1	1	3	240	27.4799	7.35693
Q8BTZ7	Mannose-1-phosphate guanyltransferase beta OS=Mus musculus GN=Gmppb PE=1 SV=1 - [GMPPB_MOUSE]	7.5	1	1	1	1	360	39.8906	6.7417
P00405	Cytochrome c oxidase subunit 2 OS=Mus musculus GN=Mtco2 PE=1 SV=1 - [COX2_MOUSE]	7.49	1	1	1	1	227	25.959	4.729
G3UYK8	Coronin OS=Mus musculus GN=Coro1a PE=1 SV=1 - [G3UYK8_MOUSE]	7.46	3	3	3	5	389	43.233	6.7417
Q91W01	Phosphomannomutase OS=Mus musculus GN=Pmm1 PE=1 SV=1 - [Q91W01_MOUSE]	7.43	2	1	1	1	202	23.0886	5.26221
P14115	60S ribosomal protein L27a OS=Mus musculus GN=Rpl27a PE=1 SV=5 - [RL27A_MOUSE]	7.43	1	1	1	1	148	16.595	11.1216
Q61598	Rab GDP dissociation inhibitor beta OS=Mus musculus GN=Gdi2 PE=1 SV=1 - [GDIB_MOUSE]	7.42	1	1	3	9	445	50.5047	6.25244
A0A140T8V3	Protein Vdac3-ps1 OS=Mus musculus GN=Vdac3-ps1 PE=4 SV=1 - [A0A140T8V3_MOUSE]	7.42	3	1	2	3	283	30.6763	8.66064
Q9CQQ7	ATP synthase F(0) complex subunit B1, mitochondrial OS=Mus musculus GN=Atp5f1 PE=1 SV=1 - [AT5F1_MOUSE]	7.42	1	2	2	3	256	28.9304	9.05615
D3YZT0	60S ribosomal protein L9 OS=Mus musculus GN=Rpl9 PE=1 SV=2 - [D3YZT0_MOUSE]	7.41	5	1	1	1	108	12.3348	10.1694
A0A140LHR4	Serpin H1 (Fragment) OS=Mus musculus GN=Serpinh1 PE=1 SV=1 - [A0A140LHR4_MOUSE]	7.39	2	1	1	1	203	21.6354	8.74854
P62918	60S ribosomal protein L8 OS=Mus musculus GN=Rpl8 PE=1 SV=2 - [RL8_MOUSE]	7.39	1	2	2	2	257	28.0073	11.0337
Q3UGN9	Signal transducing adapter molecule 1 OS=Mus musculus GN=Stam PE=1 SV=1 - [Q3UGN9_MOUSE]	7.36	3	2	2	4	462	51.1122	4.86865
Q9D7E4	UPF0449 protein C19orf25 homolog OS=Mus musculus PE=1 SV=1 - [CS025_MOUSE]	7.34	1	1	1	1	109	12.1042	5.24951
P49443	Protein phosphatase 1A OS=Mus musculus GN=Ppm1a PE=1 SV=1 - [PPM1A_MOUSE]	7.33	1	2	2	2	382	42.4057	5.36377
H3BLB1	Phosphoethanolamine/phosphocholine phosphatase (Fragment) OS=Mus musculus GN=Phospho1 PE=1 SV=1 - [H3BLB1_MOUSE]	7.33	2	1	1	1	191	21.2146	8.07471
A0A0A6YXR4	Quinone oxidoreductase (Fragment) OS=Mus musculus GN=Cryz PE=1 SV=5 - [A0A0A6YXR4_MOUSE]	7.31	8	2	2	2	301	32.0587	8.29443
D3YYK8	Microtubule-associated protein RP/EB family member 2 (Fragment) OS=Mus musculus GN=Mapre2 PE=1 SV=1 - [D3YYK8_MOUSE]	7.31	3	1	1	1	260	29.4067	6.44287
Q5SNY8	Cilia- and flagella-associated protein 36 (Fragment) OS=Mus musculus GN=Cfap36 PE=1 SV=8 - [Q5SNY8_MOUSE]	7.3	2	1	1	1	137	15.7259	4.70361
Q9JKS5	Intracellular hyaluronan-binding protein 4 OS=Mus musculus GN=Habp4 PE=1 SV=2 - [HABP4_MOUSE]	7.3	2	1	1	1	411	45.8964	6.84424
Q99KX1	Myeloid leukemia factor 2 OS=Mus musculus GN=Mlf2 PE=1 SV=1 - [MLF2_MOUSE]	7.29	1	2	2	6	247	28.0372	6.97607
A0A0J9YUE4	Regulator of G-protein-signaling 6 (Fragment) OS=Mus musculus GN=Rgs6 PE=1 SV=1 - [A0A0J9YUE4_MOUSE]	7.28	12	1	1	1	206	23.713	5.99854
P17426	AP-2 complex subunit alpha-1 OS=Mus musculus GN=Ap2a1 PE=1 SV=1 - [AP2A1_MOUSE]	7.27	3	3	6	10	977	107.596	7.03467
Q6P9K8	Caskin-1 OS=Mus musculus GN=Caskin1 PE=1 SV=2 - [CSKI1_MOUSE]	7.27	1	5	5	10	1431	150.403	9.17334
P56942	Pro-MCH OS=Mus musculus GN=Pmch PE=1 SV=2 - [MCH_MOUSE]	7.27	1	1	1	1	165	18.5042	7.13721
Q8R1Q8	Cytoplasmic dynein 1 light intermediate chain 1 OS=Mus musculus GN=Dync1li1 PE=1 SV=1 - [DC1L1_MOUSE]	7.27	1	3	3	3	523	56.5791	6.41748
P17427	AP-2 complex subunit alpha-2 OS=Mus musculus GN=Ap2a2 PE=1 SV=2 - [AP2A2_MOUSE]	7.25	3	4	7	11	938	103.951	6.93213
E9Q6A9	Catenin beta-1 OS=Mus musculus GN=Ctnnb1 PE=1 SV=1 - [E9Q6A9_MOUSE]	7.25	5	3	3	5	607	66.5199	7.59131
P62852	40S ribosomal protein S25 OS=Mus musculus GN=Rps25 PE=1 SV=1 - [RS25_MOUSE]	7.2	1	1	1	1	125	13.7337	10.1108
Q78ZA7	Nucleosome assembly protein 1-like 4 OS=Mus musculus GN=Nap1l4 PE=1 SV=1 - [NP1L4_MOUSE]	7.2	3	2	2	4	375	42.6529	4.66553
Q99JR8	SWI/SNF-related matrix-associated actin-dependent regulator of chromatin subfamily D member 2 OS=Mus musculus GN=Smarcd2 PE=1 SV=2 - [SMRD2_MOUSE]	7.16	1	1	1	1	531	59.0476	9.64209
Q91YQ3	Cold shock domain-containing protein C2 OS=Mus musculus GN=Csdc2 PE=1 SV=2 - [CSDC2_MOUSE]	7.14	1	1	1	1	154	16.8426	7.54736
Q9QYB1	Chloride intracellular channel protein 4 OS=Mus musculus GN=Clic4 PE=1 SV=3 - [CLIC4_MOUSE]	7.11	1	1	1	1	253	28.7107	5.59229
A2AIH8	Pirin (Fragment) OS=Mus musculus GN=Pir PE=1 SV=1 - [A2AIH8_MOUSE]	7.11	2	1	1	1	253	27.9253	6.91748
Q6PGB6	N-alpha-acetyltransferase 50 OS=Mus musculus GN=Naa50 PE=1 SV=1 - [NAA50_MOUSE]	7.1	1	1	1	1	169	19.402	8.80713
E9PUX4	60S ribosomal protein L6 OS=Mus musculus GN=Rpl6l PE=3 SV=1 - [E9PUX4_MOUSE]	7.09	2	3	3	4	296	33.5699	10.6968
S4R1V0	PDZ and LIM domain protein 1 (Fragment) OS=Mus musculus GN=Pdlim1 PE=1 SV=1 - [S4R1V0_MOUSE]	7.07	2	1	1	2	198	21.3546	6.37939
O88910	MAGUK p55 subfamily member 3 OS=Mus musculus GN=Mpp3 PE=1 SV=2 - [MPP3_MOUSE]	7.04	2	2	2	2	568	64.3609	6.34131
Q8BYQ0	Arylacetamide deacetylase-like 1, isoform CRA_c OS=Mus musculus GN=Nceh1 PE=1 SV=1 - [Q8BYQ0_MOUSE]	7.04	2	1	1	1	199	21.7062	6.52197
Q3SXD3	HD domain-containing protein 2 OS=Mus musculus GN=Hddc2 PE=1 SV=1 - [HDDC2_MOUSE]	7.04	1	1	1	1	199	22.7383	5.021
Q8C2Q3	RNA-binding protein 14 OS=Mus musculus GN=Rbm14 PE=1 SV=1 - [RBM14_MOUSE]	7.03	6	4	4	4	669	69.406	9.67139
A3KGE4	Noelin OS=Mus musculus GN=Olfm1 PE=1 SV=1 - [A3KGE4_MOUSE]	7.01	4	2	2	4	442	50.9951	6.53662
A2AG39	Stomatin-like protein 2, mitochondrial (Fragment) OS=Mus musculus GN=Stoml2 PE=1 SV=1 - [A2AG39_MOUSE]	6.99	3	1	1	1	286	30.8552	7.28369
A1BN54	Alpha actinin 1a OS=Mus musculus GN=Actn1 PE=1 SV=1 - [A1BN54_MOUSE]	6.99	7	6	6	10	887	102.655	5.47803
O88851	Putative hydrolase RBBP9 OS=Mus musculus GN=Rbbp9 PE=1 SV=2 - [RBBP9_MOUSE]	6.99	1	1	1	1	186	20.8983	5.97314
Q9JKB1	Ubiquitin carboxyl-terminal hydrolase isozyme L3 OS=Mus musculus GN=Uchl3 PE=1 SV=2 - [UCHL3_MOUSE]	6.96	1	1	1	1	230	26.135	5.04639
Q2TPA8	Hydroxysteroid dehydrogenase-like protein 2 OS=Mus musculus GN=Hsdl2 PE=1 SV=1 - [HSDL2_MOUSE]	6.94	3	2	2	4	490	54.1739	6.7417
Q8C605	ATP-dependent 6-phosphofructokinase OS=Mus musculus GN=Pfkp PE=1 SV=1 - [Q8C605_MOUSE]	6.89	3	3	4	10	784	85.4923	6.88818
E0CY18	AN1-type zinc finger protein 2B (Fragment) OS=Mus musculus GN=Zfand2b PE=1 SV=1 - [E0CY18_MOUSE]	6.88	3	1	1	3	218	23.6825	7.72314
Q9R060	Cytosolic Fe-S cluster assembly factor NUBP1 OS=Mus musculus GN=Nubp1 PE=1 SV=1 - [NUBP1_MOUSE]	6.88	1	1	1	1	320	34.063	5.89697
Q9Z1W8	Potassium-transporting ATPase alpha chain 2 OS=Mus musculus GN=Atp12a PE=1 SV=3 - [AT12A_MOUSE]	6.86	1	2	8	69	1035	114.654	6.32861
Q99JR1	Sideroflexin-1 OS=Mus musculus GN=Sfxn1 PE=1 SV=3 - [SFXN1_MOUSE]	6.83	1	1	2	13	322	35.6263	9.23193
P60766	Cell division control protein 42 homolog OS=Mus musculus GN=Cdc42 PE=1 SV=2 - [CDC42_MOUSE]	6.81	1	2	2	7	191	21.245	6.55127
A2A6Q8	Myosin light chain 4 (Fragment) OS=Mus musculus GN=Myl4 PE=1 SV=8 - [A2A6Q8_MOUSE]	6.81	3	1	1	1	191	21.0315	5.03369
Q8BR90	UPF0600 protein C5orf51 homolog OS=Mus musculus PE=1 SV=1 - [CE051_MOUSE]	6.8	1	1	1	1	294	33.4496	5.18604
A0A0N4SV00	T-complex protein 1 subunit eta OS=Mus musculus GN=Cct7 PE=1 SV=1 - [A0A0N4SV00_MOUSE]	6.77	3	4	4	5	502	55.0226	7.82568
A0A140T8V1	Protein Fabp3-ps1 OS=Mus musculus GN=Fabp3-ps1 PE=3 SV=1 - [A0A140T8V1_MOUSE]	6.77	2	1	1	1	133	14.9247	7.34229
Q60625	Intercellular adhesion molecule 5 OS=Mus musculus GN=Icam5 PE=1 SV=2 - [ICAM5_MOUSE]	6.76	1	5	5	12	917	96.8846	6.31592
P09671	Superoxide dismutase [Mn], mitochondrial OS=Mus musculus GN=Sod2 PE=1 SV=3 - [SODM_MOUSE]	6.76	1	1	1	2	222	24.5875	8.6167
Q3USB7	Inactive phospholipase C-like protein 1 OS=Mus musculus GN=Plcl1 PE=1 SV=3 - [PLCL1_MOUSE]	6.75	1	3	3	4	1096	122.594	5.64307
B8JK82	Angiomotin-like protein 2 (Fragment) OS=Mus musculus GN=Amotl2 PE=1 SV=1 - [B8JK82_MOUSE]	6.74	5	1	1	1	193	21.1446	7.72314
Q62261	Spectrin beta chain, non-erythrocytic 1 OS=Mus musculus GN=Sptbn1 PE=1 SV=2 - [SPTB2_MOUSE]	6.73	2	12	14	27	2363	274.052	5.57959
Q78PG9	Coiled-coil domain-containing protein 25 OS=Mus musculus GN=Ccdc25 PE=1 SV=1 - [CCD25_MOUSE]	6.73	1	1	1	1	208	24.4642	6.94678
A2AEG6	Glycoprotein m6b, isoform CRA_g OS=Mus musculus GN=Gpm6b PE=1 SV=1 - [A2AEG6_MOUSE]	6.71	2	3	3	5	328	36.1727	6.13818
G3UY29	MCG22989, isoform CRA_a OS=Mus musculus GN=Rab11b PE=4 SV=1 - [G3UY29_MOUSE]	6.71	6	1	1	1	149	16.9138	6.96143
Q7TQF7	Amphiphysin OS=Mus musculus GN=Amph PE=1 SV=1 - [AMPH_MOUSE]	6.71	6	4	6	14	686	74.9672	4.62744
D3YUB9	Polyadenylate-binding protein 2 (Fragment) OS=Mus musculus GN=Pabpn1 PE=4 SV=2 - [D3YUB9_MOUSE]	6.71	6	1	1	1	164	18.2139	5.07178
A2A9X5	5'(3')-deoxyribonucleotidase, cytosolic type OS=Mus musculus GN=Nt5c PE=1 SV=1 - [A2A9X5_MOUSE]	6.7	2	1	1	35	194	21.9253	5.32568
B7ZC23	Nuclear receptor coactivator 5 OS=Mus musculus GN=Ncoa5 PE=1 SV=1 - [B7ZC23_MOUSE]	6.69	2	1	1	1	299	31.5349	9.74463
B7ZCP4	Copine-1 OS=Mus musculus GN=Cpne1 PE=1 SV=1 - [B7ZCP4_MOUSE]	6.67	5	2	2	3	480	52.8203	5.84619
A0A0J9YTV1	Bifunctional polynucleotide phosphatase/kinase OS=Mus musculus GN=Pnkp PE=1 SV=1 - [A0A0J9YTV1_MOUSE]	6.67	5	1	1	1	180	19.1129	6.7417
Q8BH58	TIP41-like protein OS=Mus musculus GN=Tiprl PE=1 SV=1 - [TIPRL_MOUSE]	6.64	1	1	1	2	271	31.2336	5.63037
E9Q805	FERM, RhoGEF and pleckstrin domain-containing protein 1 (Fragment) OS=Mus musculus GN=Farp1 PE=1 SV=1 - [E9Q805_MOUSE]	6.64	2	1	1	1	211	23.8483	6.27783
Q9CQE5	Regulator of G-protein signaling 10 OS=Mus musculus GN=Rgs10 PE=1 SV=1 - [RGS10_MOUSE]	6.63	1	1	1	1	181	21.1376	6.81494
P70404	Isocitrate dehydrogenase [NAD] subunit gamma 1, mitochondrial OS=Mus musculus GN=Idh3g PE=1 SV=1 - [IDHG1_MOUSE]	6.62	1	3	3	6	393	42.7582	9.01221
Q501J6	Probable ATP-dependent RNA helicase DDX17 OS=Mus musculus GN=Ddx17 PE=1 SV=1 - [DDX17_MOUSE]	6.62	2	3	3	5	650	72.354	8.5874
A0A1B0GSF7	60S ribosomal protein L18 OS=Mus musculus GN=Rpl18 PE=1 SV=1 - [A0A1B0GSF7_MOUSE]	6.62	4	1	1	1	136	15.2355	11.8101
O55143	Sarcoplasmic/endoplasmic reticulum calcium ATPase 2 OS=Mus musculus GN=Atp2a2 PE=1 SV=2 - [AT2A2_MOUSE]	6.61	6	4	4	18	1044	114.784	5.33838
D3YZP9	Coiled-coil domain-containing protein 6 OS=Mus musculus GN=Ccdc6 PE=1 SV=1 - [CCDC6_MOUSE]	6.61	1	2	2	3	469	52.9058	7.34229
F7CPX0	SH3-containing GRB2-like protein 3-interacting protein 1 (Fragment) OS=Mus musculus GN=Sgip1 PE=1 SV=1 - [F7CPX0_MOUSE]	6.61	2	3	3	5	575	61.9736	7.00537
Q810U4	Neuronal cell adhesion molecule OS=Mus musculus GN=Nrcam PE=1 SV=2 - [NRCAM_MOUSE]	6.61	1	7	7	12	1256	138.435	5.90967
P70196	TNF receptor-associated factor 6 OS=Mus musculus GN=Traf6 PE=1 SV=2 - [TRAF6_MOUSE]	6.6	1	1	1	1	530	60.0301	6.55127
Q3TFP0	Serine/arginine-rich-splicing factor 10 OS=Mus musculus GN=Srsf10 PE=1 SV=1 - [Q3TFP0_MOUSE]	6.59	2	1	1	1	182	22.1219	10.3306
A2AUK8	Band 4.1-like protein 1 OS=Mus musculus GN=Epb41l1 PE=1 SV=1 - [A2AUK8_MOUSE]	6.57	6	5	5	7	867	96.7933	5.65576
P59999	Actin-related protein 2/3 complex subunit 4 OS=Mus musculus GN=Arpc4 PE=1 SV=3 - [ARPC4_MOUSE]	6.55	1	1	1	1	168	19.6543	8.42627
Q9Z1J3	Cysteine desulfurase, mitochondrial OS=Mus musculus GN=Nfs1 PE=1 SV=3 - [NFS1_MOUSE]	6.54	2	2	2	2	459	50.538	8.1626
Q6ZWZ7	60S ribosomal protein L17 OS=Mus musculus GN=Rpl17 PE=1 SV=1 - [Q6ZWZ7_MOUSE]	6.52	2	1	1	1	184	21.3834	10.1841
E9Q7L0	Protein Ogdhl OS=Mus musculus GN=Ogdhl PE=1 SV=1 - [E9Q7L0_MOUSE]	6.51	1	2	5	11	1029	116.526	6.84424
D3YX34	Dynactin subunit 1 OS=Mus musculus GN=Dctn1 PE=1 SV=1 - [D3YX34_MOUSE]	6.48	4	6	6	6	1142	126.742	5.47803
Q8CAQ8	MICOS complex subunit Mic60 OS=Mus musculus GN=Immt PE=1 SV=1 - [MIC60_MOUSE]	6.47	5	4	4	8	757	83.8482	6.60986
O70433	Four and a half LIM domains protein 2 OS=Mus musculus GN=Fhl2 PE=1 SV=1 - [FHL2_MOUSE]	6.45	1	1	1	1	279	32.0505	7.29834
Q9JMG7	Hepatoma-derived growth factor-related protein 3 OS=Mus musculus GN=Hdgfrp3 PE=1 SV=2 - [HDGR3_MOUSE]	6.44	1	1	1	2	202	22.4169	8.39697
B7ZD63	RNA-binding protein 39 (Fragment) OS=Mus musculus GN=Rbm39 PE=1 SV=1 - [B7ZD63_MOUSE]	6.41	5	1	1	1	156	19.0292	11.4292
G3UX44	Estradiol 17-beta-dehydrogenase 8 (Fragment) OS=Mus musculus GN=H2-Ke6 PE=1 SV=1 - [G3UX44_MOUSE]	6.41	2	1	1	1	234	23.9704	8.79248
Q8K341	Alpha-tubulin N-acetyltransferase 1 OS=Mus musculus GN=Atat1 PE=1 SV=1 - [ATAT_MOUSE]	6.41	3	2	2	2	421	47.1346	9.979
H3BLF9	Rho guanine nucleotide exchange factor 2 (Fragment) OS=Mus musculus GN=Arhgef2 PE=1 SV=1 - [H3BLF9_MOUSE]	6.4	9	1	1	1	203	22.6172	8.25049
P52196	Thiosulfate sulfurtransferase OS=Mus musculus GN=Tst PE=1 SV=3 - [THTR_MOUSE]	6.4	1	1	1	2	297	33.4448	7.85498
Q8VHI6	Wiskott-Aldrich syndrome protein family member 3 OS=Mus musculus GN=Wasf3 PE=1 SV=1 - [WASF3_MOUSE]	6.39	1	2	2	3	501	55.1696	6.3667
Q8C522	Endonuclease domain-containing 1 protein OS=Mus musculus GN=Endod1 PE=1 SV=2 - [ENDD1_MOUSE]	6.39	1	3	3	5	501	55.2267	6.16357
E9PVP5	Molybdopterin synthase catalytic subunit OS=Mus musculus GN=Mocs2 PE=1 SV=1 - [E9PVP5_MOUSE]	6.37	3	1	1	1	157	17.0966	4.95752
P55264	Adenosine kinase OS=Mus musculus GN=Adk PE=1 SV=2 - [ADK_MOUSE]	6.37	1	2	2	2	361	40.1235	6.21436
P62137	Serine/threonine-protein phosphatase PP1-alpha catalytic subunit OS=Mus musculus GN=Ppp1ca PE=1 SV=1 - [PP1A_MOUSE]	6.36	1	2	2	2	330	37.5158	6.32861
J3QK20	Voltage-dependent L-type calcium channel subunit beta-4 OS=Mus musculus GN=Cacnb4 PE=1 SV=1 - [J3QK20_MOUSE]	6.36	7	1	2	3	519	57.8144	9.14404
Q8R3S2	Tetraspanin-33 OS=Mus musculus GN=Tspan33 PE=1 SV=1 - [TSN33_MOUSE]	6.36	1	1	1	1	283	31.5291	7.1665
F8WJK8	Hsc70-interacting protein OS=Mus musculus GN=St13 PE=1 SV=1 - [F8WJK8_MOUSE]	6.35	4	2	2	3	362	40.513	5.30029
Q8QZT2	Centriole, cilia and spindle-associated protein OS=Mus musculus GN=Ccsap PE=1 SV=1 - [CCSAP_MOUSE]	6.35	1	1	1	1	252	28.3611	9.21729
P14106	Complement C1q subcomponent subunit B OS=Mus musculus GN=C1qb PE=1 SV=2 - [C1QB_MOUSE]	6.32	2	2	2	2	253	26.7006	8.14795
Q02819	Nucleobindin-1 OS=Mus musculus GN=Nucb1 PE=1 SV=2 - [NUCB1_MOUSE]	6.32	3	2	2	7	459	53.3759	5.07178
Q9CPW2	Ferredoxin-2, mitochondrial OS=Mus musculus GN=Fdx2 PE=1 SV=1 - [FDX2_MOUSE]	6.32	1	1	1	1	174	18.7545	6.03662
Q921C1	Gap junction gamma-3 protein OS=Mus musculus GN=Gjc3 PE=1 SV=2 - [CXG3_MOUSE]	6.32	1	1	1	1	269	30.2727	8.36768
Q8R326	Paraspeckle component 1 OS=Mus musculus GN=Pspc1 PE=1 SV=1 - [PSPC1_MOUSE]	6.31	1	2	2	2	523	58.7213	6.66846
P25318	Collagen alpha-2(VIII) chain OS=Mus musculus GN=Col8a2 PE=2 SV=2 - [CO8A2_MOUSE]	6.29	1	1	1	1	699	66.9012	9.34912
Q99L13	3-hydroxyisobutyrate dehydrogenase, mitochondrial OS=Mus musculus GN=Hibadh PE=1 SV=1 - [3HIDH_MOUSE]	6.27	1	2	2	3	335	35.4166	8.1333
Q8C8R3	Ankyrin-2 OS=Mus musculus GN=Ank2 PE=1 SV=2 - [ANK2_MOUSE]	6.26	6	11	19	26	3898	425.999	5.17334
D3Z4U0	Zinc finger Ran-binding domain-containing protein 2 OS=Mus musculus GN=Zranb2 PE=1 SV=2 - [D3Z4U0_MOUSE]	6.25	2	2	2	2	320	36.2595	9.67139
A0A0A6YY72	Inosine-5'-monophosphate dehydrogenase 2 (Fragment) OS=Mus musculus GN=Impdh2 PE=1 SV=1 - [A0A0A6YY72_MOUSE]	6.25	2	1	1	1	320	34.1076	8.79248
Q6PDY2	2-aminoethanethiol dioxygenase OS=Mus musculus GN=Ado PE=1 SV=2 - [AEDO_MOUSE]	6.25	1	1	1	1	256	28.3543	5.97314
Q91X97	Neurocalcin-delta OS=Mus musculus GN=Ncald PE=1 SV=4 - [NCALD_MOUSE]	6.22	1	1	1	17	193	22.2309	5.35107
P62748	Hippocalcin-like protein 1 OS=Mus musculus GN=Hpcal1 PE=1 SV=2 - [HPCL1_MOUSE]	6.22	2	1	1	33	193	22.324	5.50342
Q9Z2Y8	Proline synthase co-transcribed bacterial homolog protein OS=Mus musculus GN=Prosc PE=1 SV=1 - [PROSC_MOUSE]	6.2	6	2	2	4	274	30.0296	8.26514
Z4YJV4	2-oxoglutarate dehydrogenase, mitochondrial OS=Mus musculus GN=Ogdh PE=1 SV=1 - [Z4YJV4_MOUSE]	6.18	2	2	5	10	1019	115.953	6.97607
P63318	Protein kinase C gamma type OS=Mus musculus GN=Prkcg PE=1 SV=1 - [KPCG_MOUSE]	6.17	2	3	3	6	697	78.3071	7.45947
Q8BPW9	Aspartyl aminopeptidase OS=Mus musculus GN=Dnpep PE=1 SV=1 - [Q8BPW9_MOUSE]	6.17	3	2	2	2	470	51.6295	7.41553
Q3TBU7	Arf-GAP domain and FG repeat-containing protein 2 (Fragment) OS=Mus musculus GN=Agfg2 PE=1 SV=1 - [Q3TBU7_MOUSE]	6.16	3	1	1	1	406	41.7137	8.98291
Q9D1Q6	Endoplasmic reticulum resident protein 44 OS=Mus musculus GN=Erp44 PE=1 SV=1 - [ERP44_MOUSE]	6.16	3	2	2	3	406	46.8233	5.2749
P16546	Spectrin alpha chain, non-erythrocytic 1 OS=Mus musculus GN=Sptan1 PE=1 SV=4 - [SPTN1_MOUSE]	6.15	6	13	13	40	2472	284.422	5.32568
Q9WV92	Band 4.1-like protein 3 OS=Mus musculus GN=Epb41l3 PE=1 SV=1 - [E41L3_MOUSE]	6.14	1	4	4	6	929	103.274	5.31299
P46664	Adenylosuccinate synthetase isozyme 2 OS=Mus musculus GN=Adss PE=1 SV=2 - [PURA2_MOUSE]	6.14	1	2	2	2	456	49.9896	6.37939
B1AXV0	DOMON domain-containing protein FRRS1L OS=Mus musculus GN=Frrs1l PE=1 SV=1 - [FRS1L_MOUSE]	6.14	1	1	1	1	293	32.4859	5.42725
D3Z3B8	Disks large homolog 1 OS=Mus musculus GN=Dlg1 PE=1 SV=1 - [D3Z3B8_MOUSE]	6.12	9	3	5	5	834	91.5664	6.34131
E9Q7S0	Synaptojanin-1 OS=Mus musculus GN=Synj1 PE=1 SV=1 - [E9Q7S0_MOUSE]	6.11	7	5	5	11	1309	144.505	7.34229
P31938	Dual specificity mitogen-activated protein kinase kinase 1 OS=Mus musculus GN=Map2k1 PE=1 SV=2 - [MP2K1_MOUSE]	6.11	1	2	2	2	393	43.4464	6.69775
J3QMN4	Thioredoxin reductase 2, mitochondrial OS=Mus musculus GN=Txnrd2 PE=1 SV=1 - [J3QMN4_MOUSE]	6.11	11	3	3	4	491	53.0182	8.88037
P09240	Cholecystokinin OS=Mus musculus GN=Cck PE=1 SV=3 - [CCKN_MOUSE]	6.09	1	1	1	1	115	12.7615	9.34912
Q9CR86	Calcium-regulated heat stable protein 1 OS=Mus musculus GN=Carhsp1 PE=1 SV=1 - [CHSP1_MOUSE]	6.08	1	2	2	2	148	16.0521	8.20654
P56213	FAD-linked sulfhydryl oxidase ALR OS=Mus musculus GN=Gfer PE=1 SV=2 - [ALR_MOUSE]	6.06	1	1	1	1	198	22.862	7.92822
Q8R5F9	Cleft palate-related protein 1 OS=Mus musculus GN=AY074887 PE=2 SV=2 - [Q8R5F9_MOUSE]	6.06	1	1	1	1	132	14.1013	11.0483
Q9QYR6	Microtubule-associated protein 1A OS=Mus musculus GN=Map1a PE=1 SV=2 - [MAP1A_MOUSE]	6.05	2	13	14	47	2776	299.957	4.99561
A0A0A6YXP3	Muscleblind-like protein 1 (Fragment) OS=Mus musculus GN=Mbnl1 PE=1 SV=1 - [A0A0A6YXP3_MOUSE]	6.04	7	1	1	1	182	19.6539	8.77783
F7B5B5	Protein Hnrnpr OS=Mus musculus GN=Hnrnpr PE=1 SV=1 - [F7B5B5_MOUSE]	6.03	6	1	4	6	531	59.5896	9.15869
A2AEJ8	Cleavage stimulation factor subunit 2 (Fragment) OS=Mus musculus GN=Cstf2 PE=1 SV=1 - [A2AEJ8_MOUSE]	5.98	3	1	1	1	184	20.1072	6.02393
O35465	Peptidyl-prolyl cis-trans isomerase FKBP8 OS=Mus musculus GN=Fkbp8 PE=1 SV=2 - [FKBP8_MOUSE]	5.97	2	2	2	3	402	43.5013	5.16064
E9QKH8	Catenin delta-2 OS=Mus musculus GN=Ctnnd2 PE=1 SV=1 - [E9QKH8_MOUSE]	5.94	6	5	5	8	1246	134.859	7.6499
Q8K0U4	Heat shock 70 kDa protein 12A OS=Mus musculus GN=Hspa12a PE=1 SV=1 - [HS12A_MOUSE]	5.93	1	3	3	3	675	74.8245	6.771
Q8CCK0	Core histone macro-H2A.2 OS=Mus musculus GN=H2afy2 PE=1 SV=3 - [H2AW_MOUSE]	5.91	1	1	1	1	372	40.0674	9.68604
J3QJV7	Rab GTPase-binding effector protein 1 OS=Mus musculus GN=Rabep1 PE=1 SV=1 - [J3QJV7_MOUSE]	5.91	2	3	3	4	778	89.7724	4.99561
Q8BFQ8	Parkinson disease 7 domain-containing protein 1 OS=Mus musculus GN=Pddc1 PE=1 SV=1 - [PDDC1_MOUSE]	5.91	1	1	1	2	220	23.2628	7.04932
P60843	Eukaryotic initiation factor 4A-I OS=Mus musculus GN=Eif4a1 PE=1 SV=1 - [IF4A1_MOUSE]	5.91	4	2	2	3	406	46.1246	5.47803
Q91WK5	Glycine cleavage system H protein, mitochondrial OS=Mus musculus GN=Gcsh PE=1 SV=2 - [GCSH_MOUSE]	5.88	1	1	1	1	170	18.6253	4.75439
D3Z1X5	Rho GTPase-activating protein 26 (Fragment) OS=Mus musculus GN=Arhgap26 PE=1 SV=1 - [D3Z1X5_MOUSE]	5.88	3	1	1	1	170	19.514	9.02686
O54724	Polymerase I and transcript release factor OS=Mus musculus GN=Ptrf PE=1 SV=1 - [PTRF_MOUSE]	5.87	1	2	2	2	392	43.927	5.51611
Q6PE13	Proline-rich transmembrane protein 3 OS=Mus musculus GN=Prrt3 PE=1 SV=1 - [PRRT3_MOUSE]	5.87	2	3	3	3	971	101.162	7.51807
Q9ESM3	Hyaluronan and proteoglycan link protein 2 OS=Mus musculus GN=Hapln2 PE=1 SV=1 - [HPLN2_MOUSE]	5.87	1	1	1	2	341	37.9012	9.08545
B7ZCL9	55 kDa erythrocyte membrane protein (Fragment) OS=Mus musculus GN=Mpp1 PE=1 SV=1 - [B7ZCL9_MOUSE]	5.85	4	1	1	1	205	22.9867	8.70459
D6RI30	Diacylglycerol kinase theta OS=Mus musculus GN=Dgkq PE=1 SV=1 - [D6RI30_MOUSE]	5.84	2	1	1	1	257	27.81	9.23193
Q9CQ19	Myosin regulatory light polypeptide 9 OS=Mus musculus GN=Myl9 PE=1 SV=3 - [MYL9_MOUSE]	5.81	1	1	1	2	172	19.8415	4.91943
Q3THE2	Myosin regulatory light chain 12B OS=Mus musculus GN=Myl12b PE=1 SV=2 - [ML12B_MOUSE]	5.81	2	1	1	19	172	19.7665	4.84326
Q9WVQ5	Methylthioribulose-1-phosphate dehydratase OS=Mus musculus GN=Apip PE=1 SV=1 - [MTNB_MOUSE]	5.81	1	1	1	1	241	26.9311	6.90283
F6QH25	CD166 antigen (Fragment) OS=Mus musculus GN=Alcam PE=1 SV=1 - [F6QH25_MOUSE]	5.8	4	1	1	1	345	38.4194	5.60498
Q8VDS4	Regulation of nuclear pre-mRNA domain-containing protein 1A OS=Mus musculus GN=Rprd1a PE=1 SV=1 - [RPR1A_MOUSE]	5.77	1	1	1	1	312	35.6786	7.57666
Q6NZD2	Sorting nexin 1 OS=Mus musculus GN=Snx1 PE=1 SV=1 - [Q6NZD2_MOUSE]	5.76	2	2	2	2	521	58.8426	5.26221
Q9JK48	Endophilin-B1 OS=Mus musculus GN=Sh3glb1 PE=1 SV=1 - [SHLB1_MOUSE]	5.75	3	2	2	3	365	40.8298	6.03662
P12658	Calbindin OS=Mus musculus GN=Calb1 PE=1 SV=2 - [CALB1_MOUSE]	5.75	1	1	1	1	261	29.9751	4.83057
Q61165	Sodium/hydrogen exchanger 1 OS=Mus musculus GN=Slc9a1 PE=1 SV=1 - [SL9A1_MOUSE]	5.73	1	2	2	2	820	91.4095	7.12256
A0A0R4J107	Acylamino-acid-releasing enzyme (Fragment) OS=Mus musculus GN=Apeh PE=1 SV=1 - [A0A0R4J107_MOUSE]	5.73	3	2	2	3	716	79.7638	5.59229
Q3TDT0	Tripartite motif-containing protein 3 OS=Mus musculus GN=Trim3 PE=1 SV=1 - [Q3TDT0_MOUSE]	5.72	3	4	4	4	717	78.2226	8.1626
P09103	Protein disulfide-isomerase OS=Mus musculus GN=P4hb PE=1 SV=2 - [PDIA1_MOUSE]	5.7	1	2	2	4	509	57.0228	4.88135
P97351	40S ribosomal protein S3a OS=Mus musculus GN=Rps3a PE=1 SV=3 - [RS3A_MOUSE]	5.68	1	2	2	2	264	29.8657	9.72998
Q9CY97	RNA polymerase II subunit A C-terminal domain phosphatase SSU72 OS=Mus musculus GN=Ssu72 PE=1 SV=1 - [SSU72_MOUSE]	5.67	1	1	1	1	194	22.5029	5.21143
Q9JIS5	Synaptic vesicle glycoprotein 2A OS=Mus musculus GN=Sv2a PE=1 SV=1 - [SV2A_MOUSE]	5.66	1	3	3	7	742	82.5939	5.56689
P12961	Neuroendocrine protein 7B2 OS=Mus musculus GN=Scg5 PE=1 SV=1 - [7B2_MOUSE]	5.66	1	1	1	1	212	23.8509	5.80811
Q3UUI3	Acyl-coenzyme A thioesterase THEM4 OS=Mus musculus GN=Them4 PE=1 SV=1 - [THEM4_MOUSE]	5.65	1	1	1	1	230	26.0146	9.64209
P47857	ATP-dependent 6-phosphofructokinase, muscle type OS=Mus musculus GN=Pfkm PE=1 SV=3 - [PFKAM_MOUSE]	5.64	1	4	5	11	780	85.2146	8.00146
Q6F5F2	Protein Sirpb1a OS=Mus musculus GN=SIRP-beta PE=2 SV=1 - [Q6F5F2_MOUSE]	5.63	5	1	2	2	391	43.4639	7.98682
Q9WV34	MAGUK p55 subfamily member 2 OS=Mus musculus GN=Mpp2 PE=1 SV=1 - [MPP2_MOUSE]	5.62	1	2	3	3	552	61.5168	6.44287
Q8BH59	Calcium-binding mitochondrial carrier protein Aralar1 OS=Mus musculus GN=Slc25a12 PE=1 SV=1 - [CMC1_MOUSE]	5.61	1	3	3	5	677	74.5227	8.25049
D3Z111	Acyl-protein thioesterase 1 OS=Mus musculus GN=Lypla1 PE=1 SV=1 - [D3Z111_MOUSE]	5.61	3	1	1	2	196	21.1375	6.17627
P61021	Ras-related protein Rab-5B OS=Mus musculus GN=Rab5b PE=1 SV=1 - [RAB5B_MOUSE]	5.58	1	1	1	1	215	23.6919	8.1333
B2FDE8	Putative transferase CAF17 homolog, mitochondrial (Fragment) OS=Mus musculus GN=Iba57 PE=1 SV=1 - [B2FDE8_MOUSE]	5.58	2	1	1	1	215	22.6408	9.56885
B1ATI9	Growth arrest-specific protein 7 OS=Mus musculus GN=Gas7 PE=1 SV=1 - [B1ATI9_MOUSE]	5.58	3	1	1	1	412	47.2317	7.59131
Q8CBY8	Dynactin subunit 4 OS=Mus musculus GN=Dctn4 PE=1 SV=1 - [DCTN4_MOUSE]	5.57	1	2	2	6	467	53.0231	7.72314
D3Z1G7	Cob(I)yrinic acid a,c-diamide adenosyltransferase, mitochondrial OS=Mus musculus GN=Mmab PE=1 SV=1 - [D3Z1G7_MOUSE]	5.56	2	1	1	2	180	19.8891	9.40771
D3Z5P0	Serine/threonine-protein kinase BRSK1 OS=Mus musculus GN=Brsk1 PE=1 SV=1 - [D3Z5P0_MOUSE]	5.55	2	2	2	3	703	77.1486	9.17334
Q9Z0H8	CAP-Gly domain-containing linker protein 2 OS=Mus musculus GN=Clip2 PE=1 SV=2 - [CLIP2_MOUSE]	5.54	1	3	4	4	1047	115.84	6.48096
Q9D394	Protein RUFY3 OS=Mus musculus GN=Rufy3 PE=1 SV=1 - [RUFY3_MOUSE]	5.54	2	2	2	2	469	52.9732	5.49072
Q99LU0	Charged multivesicular body protein 1b-1 OS=Mus musculus GN=Chmp1b1 PE=1 SV=1 - [CH1B1_MOUSE]	5.53	2	1	1	1	199	22.1101	8.104
G3UWM7	28S ribosomal protein S29, mitochondrial (Fragment) OS=Mus musculus GN=Dap3 PE=1 SV=1 - [G3UWM7_MOUSE]	5.53	5	1	1	1	217	25.1219	8.104
Q3ULD5	Methylcrotonoyl-CoA carboxylase beta chain, mitochondrial OS=Mus musculus GN=Mccc2 PE=1 SV=1 - [MCCB_MOUSE]	5.51	1	2	2	3	563	61.3402	8.00146
O09174	Alpha-methylacyl-CoA racemase OS=Mus musculus GN=Amacr PE=1 SV=4 - [AMACR_MOUSE]	5.51	1	1	1	1	381	41.6775	7.40088
Q8R317	Ubiquilin-1 OS=Mus musculus GN=Ubqln1 PE=1 SV=1 - [UBQL1_MOUSE]	5.5	3	3	3	6	582	61.9372	4.94482
P35505	Fumarylacetoacetase OS=Mus musculus GN=Fah PE=1 SV=2 - [FAAA_MOUSE]	5.49	2	2	2	4	419	46.146	7.18115
O55137	Acyl-coenzyme A thioesterase 1 OS=Mus musculus GN=Acot1 PE=1 SV=1 - [ACOT1_MOUSE]	5.49	7	2	2	4	419	46.1067	6.58057
Q9ER00	Syntaxin-12 OS=Mus musculus GN=Stx12 PE=1 SV=1 - [STX12_MOUSE]	5.47	1	1	1	1	274	31.1759	5.43994
P46096	Synaptotagmin-1 OS=Mus musculus GN=Syt1 PE=1 SV=1 - [SYT1_MOUSE]	5.46	1	1	2	3	421	47.3878	8.52881
E9PYI8	Ubiquitin carboxyl-terminal hydrolase 14 OS=Mus musculus GN=Usp14 PE=1 SV=1 - [E9PYI8_MOUSE]	5.46	2	2	2	3	458	52.2853	5.65576
P62192	26S protease regulatory subunit 4 OS=Mus musculus GN=Psmc1 PE=1 SV=1 - [PRS4_MOUSE]	5.45	1	1	2	4	440	49.1537	6.21436
D3Z3M7	CAP-Gly domain-containing linker protein 1 OS=Mus musculus GN=Clip1 PE=1 SV=1 - [D3Z3M7_MOUSE]	5.45	7	3	4	4	1320	147.912	5.31299
A0A0R4J2C2	Synaptotagmin II OS=Mus musculus GN=Syt2 PE=1 SV=1 - [A0A0R4J2C2_MOUSE]	5.45	2	1	2	2	422	47.2182	7.98682
Q9CPU0	Lactoylglutathione lyase OS=Mus musculus GN=Glo1 PE=1 SV=3 - [LGUL_MOUSE]	5.43	1	1	1	1	184	20.7964	5.46533
Q9CPT4	Myeloid-derived growth factor OS=Mus musculus GN=Mydgf PE=1 SV=1 - [MYDGF_MOUSE]	5.42	1	1	1	1	166	17.971	6.78564
P12382	ATP-dependent 6-phosphofructokinase, liver type OS=Mus musculus GN=Pfkl PE=1 SV=4 - [PFKAL_MOUSE]	5.38	1	1	3	4	780	85.3054	7.1665
P97447	Four and a half LIM domains protein 1 OS=Mus musculus GN=Fhl1 PE=1 SV=3 - [FHL1_MOUSE]	5.36	3	1	1	1	280	31.8668	8.36768
Q8BH69	Selenide, water dikinase 1 OS=Mus musculus GN=Sephs1 PE=1 SV=1 - [SPS1_MOUSE]	5.36	1	1	1	1	392	42.8787	5.97314
G5E8R3	Pyruvate carboxylase OS=Mus musculus GN=Pcx PE=1 SV=1 - [G5E8R3_MOUSE]	5.35	3	6	6	9	1178	129.618	6.7124
P35293	Ras-related protein Rab-18 OS=Mus musculus GN=Rab18 PE=1 SV=2 - [RAB18_MOUSE]	5.34	1	1	1	1	206	23.0207	5.36377
Q9DCT2	NADH dehydrogenase [ubiquinone] iron-sulfur protein 3, mitochondrial OS=Mus musculus GN=Ndufs3 PE=1 SV=2 - [NDUS3_MOUSE]	5.32	1	2	2	21	263	30.1305	7.1665
E9Q3V6	Septin-2 OS=Mus musculus GN=Sept2 PE=1 SV=1 - [E9Q3V6_MOUSE]	5.3	2	1	1	1	321	36.9549	6.0874
Q9JM63	ATP-sensitive inward rectifier potassium channel 10 OS=Mus musculus GN=Kcnj10 PE=1 SV=1 - [KCJ10_MOUSE]	5.28	1	1	1	2	379	42.4053	8.29443
Q02105	Complement C1q subcomponent subunit C OS=Mus musculus GN=C1qc PE=1 SV=2 - [C1QC_MOUSE]	5.28	1	1	1	1	246	25.9749	8.54346
Q00558	Factor VIII intron 22 protein OS=Mus musculus GN=F8a1 PE=1 SV=1 - [F8I2_MOUSE]	5.26	2	1	1	1	380	40.4641	6.88818
E9Q2V1	Carbonic anhydrase-related protein 10 OS=Mus musculus GN=Car10 PE=1 SV=1 - [E9Q2V1_MOUSE]	5.26	2	1	1	1	304	34.9296	8.08936
P61963	DDB1- and CUL4-associated factor 7 OS=Mus musculus GN=Dcaf7 PE=1 SV=1 - [DCAF7_MOUSE]	5.26	1	1	1	1	342	38.9011	5.51611
F2Z459	Protein Acat3 OS=Mus musculus GN=Acat3 PE=1 SV=1 - [F2Z459_MOUSE]	5.24	4	1	1	1	248	26.2294	7.53271
Q8R191	Synaptogyrin-3 OS=Mus musculus GN=Syngr3 PE=1 SV=1 - [SNG3_MOUSE]	5.24	1	1	1	5	229	24.5454	8.17725
P23242	Gap junction alpha-1 protein OS=Mus musculus GN=Gja1 PE=1 SV=2 - [CXA1_MOUSE]	5.24	1	1	1	1	382	42.9769	8.76318
Q9ESN6	Tripartite motif-containing protein 2 OS=Mus musculus GN=Trim2 PE=1 SV=1 - [TRIM2_MOUSE]	5.24	3	2	2	3	744	81.3941	6.96143
Q3UHJ0	AP2-associated protein kinase 1 OS=Mus musculus GN=Aak1 PE=1 SV=2 - [AAK1_MOUSE]	5.21	1	3	3	23	959	103.282	6.69775
Q4VA93	Protein kinase C OS=Mus musculus GN=Prkca PE=1 SV=1 - [Q4VA93_MOUSE]	5.21	3	3	3	3	672	76.7742	7.04932
Q8BUV3	Gephyrin OS=Mus musculus GN=Gphn PE=1 SV=2 - [GEPH_MOUSE]	5.2	2	3	3	3	769	83.2298	5.60498
Q9JHI5	Isovaleryl-CoA dehydrogenase, mitochondrial OS=Mus musculus GN=Ivd PE=1 SV=1 - [IVD_MOUSE]	5.19	1	3	3	4	424	46.2959	8.29443
Q9QZ57	Heat shock protein beta-3 OS=Mus musculus GN=Hspb3 PE=2 SV=1 - [HSPB3_MOUSE]	5.19	1	1	1	1	154	17.2189	5.38916
Q9CYW4	Haloacid dehalogenase-like hydrolase domain-containing protein 3 OS=Mus musculus GN=Hdhd3 PE=1 SV=1 - [HDHD3_MOUSE]	5.18	1	1	1	1	251	28.0093	6.80029
Q9CXS4	Centromere protein V OS=Mus musculus GN=Cenpv PE=1 SV=2 - [CENPV_MOUSE]	5.16	1	1	1	2	252	27.5238	9.78857
Q9Z1Z2	Serine-threonine kinase receptor-associated protein OS=Mus musculus GN=Strap PE=1 SV=2 - [STRAP_MOUSE]	5.14	1	1	1	1	350	38.418	5.12256
A2AFG7	Neural cell adhesion molecule L1 OS=Mus musculus GN=L1cam PE=1 SV=1 - [A2AFG7_MOUSE]	5.12	5	5	5	7	1250	139.735	5.84619
A0A0R4J252	Transporter (Fragment) OS=Mus musculus GN=Slc6a17 PE=1 SV=1 - [A0A0R4J252_MOUSE]	5.1	3	2	2	2	686	76.432	6.45557
Q9DBL1	Short/branched chain specific acyl-CoA dehydrogenase, mitochondrial OS=Mus musculus GN=Acadsb PE=1 SV=1 - [ACDSB_MOUSE]	5.09	2	1	1	1	432	47.8433	7.86963
P97478	5-demethoxyubiquinone hydroxylase, mitochondrial OS=Mus musculus GN=Coq7 PE=1 SV=3 - [COQ7_MOUSE]	5.07	3	1	1	1	217	24.0263	7.1665
Q9D892	Inosine triphosphate pyrophosphatase OS=Mus musculus GN=Itpa PE=1 SV=2 - [ITPA_MOUSE]	5.05	1	2	2	3	198	21.883	5.87158
Q3UGR5	Haloacid dehalogenase-like hydrolase domain-containing protein 2 OS=Mus musculus GN=Hdhd2 PE=1 SV=2 - [HDHD2_MOUSE]	5.02	1	1	1	1	259	28.7121	6.04932
Q99LB2	Dehydrogenase/reductase SDR family member 4 OS=Mus musculus GN=Dhrs4 PE=1 SV=3 - [DHRS4_MOUSE]	5.02	1	1	1	1	279	29.8657	9.37842
F7BNZ5	Breast carcinoma-amplified sequence 1 homolog (Fragment) OS=Mus musculus GN=Bcas1 PE=1 SV=1 - [F7BNZ5_MOUSE]	5.01	4	2	2	7	379	40.5124	9.02686
Q8JZP2	Synapsin-3 OS=Mus musculus GN=Syn3 PE=1 SV=2 - [SYN3_MOUSE]	5.01	1	1	2	13	579	63.2748	9.37842
A0A0A6YVS6	Ras/Rap GTPase-activating protein SynGAP (Fragment) OS=Mus musculus GN=Syngap1 PE=1 SV=2 - [A0A0A6YVS6_MOUSE]	5	10	5	5	11	1281	141.805	8.89502
D3YU09	Guanine deaminase OS=Mus musculus GN=Gda PE=1 SV=1 - [D3YU09_MOUSE]	5	2	2	2	9	380	42.4525	5.32568
Q9DBC7	cAMP-dependent protein kinase type I-alpha regulatory subunit OS=Mus musculus GN=Prkar1a PE=1 SV=3 - [KAP0_MOUSE]	4.99	4	2	2	3	381	43.158	5.35107
A2ALS5	Rap1 GTPase-activating protein 1 OS=Mus musculus GN=Rap1gap PE=1 SV=2 - [RPGP1_MOUSE]	4.98	3	2	2	2	663	73.3874	5.87158
Q8K310	Matrin-3 OS=Mus musculus GN=Matr3 PE=1 SV=1 - [MATR3_MOUSE]	4.96	11	4	4	12	846	94.5718	6.25244
E9Q2S9	Coiled-coil domain-containing protein 43 OS=Mus musculus GN=Ccdc43 PE=1 SV=1 - [E9Q2S9_MOUSE]	4.95	2	1	1	2	222	25.02	5.021
E9Q1X8	Voltage-dependent calcium channel subunit alpha-2/delta-1 OS=Mus musculus GN=Cacna2d1 PE=1 SV=2 - [E9Q1X8_MOUSE]	4.95	2	4	4	6	1091	123.128	5.17334
Q9CQ65	S-methyl-5'-thioadenosine phosphorylase OS=Mus musculus GN=Mtap PE=1 SV=1 - [MTAP_MOUSE]	4.95	1	2	2	2	283	31.0417	7.13721
P31650	Sodium- and chloride-dependent GABA transporter 3 OS=Mus musculus GN=Slc6a11 PE=1 SV=2 - [S6A11_MOUSE]	4.94	1	3	3	3	627	69.9143	6.97607
A0A140LHA2	Mitotic checkpoint protein BUB3 OS=Mus musculus GN=Bub3 PE=1 SV=1 - [A0A140LHA2_MOUSE]	4.94	2	1	1	1	324	36.743	6.84424
Q3THK7	GMP synthase [glutamine-hydrolyzing] OS=Mus musculus GN=Gmps PE=1 SV=2 - [GUAA_MOUSE]	4.91	1	2	2	3	693	76.6749	6.72705
Q99M71	Mammalian ependymin-related protein 1 OS=Mus musculus GN=Epdr1 PE=1 SV=1 - [EPDR1_MOUSE]	4.91	1	1	1	5	224	25.4687	7.57666
Q8CEB6	1,5-anhydro-D-fructose reductase OS=Mus musculus GN=Akr1e1 PE=1 SV=1 - [Q8CEB6_MOUSE]	4.9	2	1	2	4	245	28.2467	7.82568
A0A0A6YWH7	Antithrombin-III (Fragment) OS=Mus musculus GN=Serpinc1 PE=1 SV=1 - [A0A0A6YWH7_MOUSE]	4.9	2	1	1	1	286	31.9241	8.25049
G3UYX3	Protein Nova2 OS=Mus musculus GN=Nova2 PE=1 SV=2 - [G3UYX3_MOUSE]	4.88	2	1	2	2	492	49.0366	8.1626
P58404	Striatin-4 OS=Mus musculus GN=Strn4 PE=1 SV=2 - [STRN4_MOUSE]	4.87	4	2	3	4	760	81.5945	5.37646
[truncated: 498 more rows]
